# Supplementary material
Source: PubMed Central journal article supplement (PMC2816026)
Supplement: M800521-MCP200_5.pdf [file M800521-MCP200_5.pdf]

Supplementary Data S5 (Reini et al, 2009)

Content:

|                                                                                                                                                          |    |
|----------------------------------------------------------------------------------------------------------------------------------------------------------|----|
| A: Representative fragmentation spectra and mass tables of InlB <sub>321</sub> regulated phosphopeptides from protein kinases according to table 1. .... | 2  |
| B: Likelihood curve graphics of InlB <sub>321</sub> regulated phosphopeptides from protein kinases according to table 1. ....                            | 14 |
| C: Fragmentation spectra and mass tables of phosphopeptides from protein kinases according to supplementary data S1/S2. ....                             | 21 |

**A. Representative fragmentation spectra and mass tables of InIB<sub>321</sub> regulated phosphopeptides from protein kinases according to table 1.**

**MK03\_HUMAN: IADPEHDHTGFLpTEpYVATR**

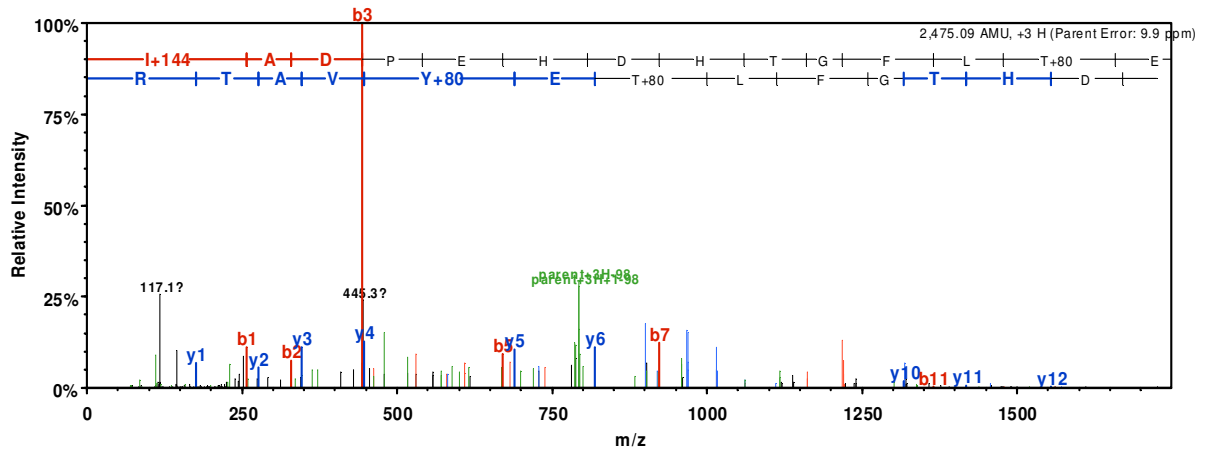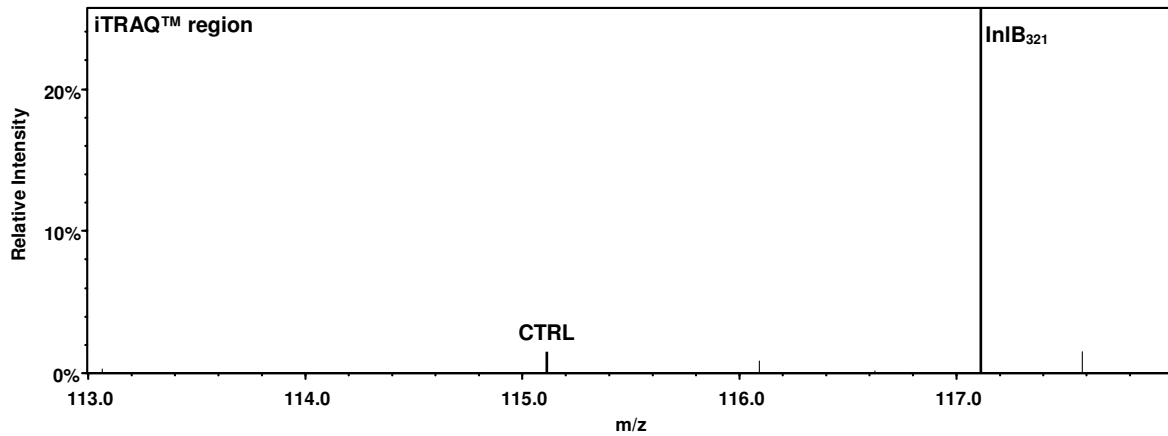

| B  | B Ions  | B+2H    | B-NH3   | B-H2O   | AA    | Y Ions  | Y+2H    | Y-NH3   | Y-H2O   | Y  |
|----|---------|---------|---------|---------|-------|---------|---------|---------|---------|----|
| 1  | 258.2   |         |         |         | I+144 | 2,476.1 | 1,238.5 | 2,459.0 | 2,458.1 | 19 |
| 2  | 329.2   |         |         |         | A     | 2,218.9 | 1,109.9 | 2,201.9 | 2,200.9 | 18 |
| 3  | 444.3   |         |         | 426.2   | D     | 2,147.8 | 1,074.4 | 2,130.8 | 2,129.8 | 17 |
| 4  | 541.3   |         |         | 523.3   | P     | 2,032.8 | 1,016.9 | 2,015.8 | 2,014.8 | 16 |
| 5  | 670.4   |         |         | 652.3   | E     | 1,935.8 | 968.4   | 1,918.7 | 1,917.8 | 15 |
| 6  | 807.4   | 404.2   |         | 789.4   | H     | 1,806.7 | 903.9   | 1,789.7 | 1,788.7 | 14 |
| 7  | 922.4   | 461.7   |         | 904.4   | D     | 1,669.7 | 835.3   | 1,652.6 | 1,651.7 | 13 |
| 8  | 1,059.5 | 530.3   |         | 1,041.5 | H     | 1,554.6 | 777.8   | 1,537.6 | 1,536.6 | 12 |
| 9  | 1,160.5 | 580.8   |         | 1,142.5 | T     | 1,417.6 | 709.3   | 1,400.6 | 1,399.6 | 11 |
| 10 | 1,217.6 | 609.3   |         | 1,199.6 | G     | 1,316.5 | 658.8   | 1,299.5 | 1,298.5 | 10 |
| 11 | 1,364.6 | 682.8   |         | 1,346.6 | F     | 1,259.5 | 630.3   | 1,242.5 | 1,241.5 | 9  |
| 12 | 1,477.7 | 739.4   |         | 1,459.7 | L     | 1,112.4 | 556.7   | 1,095.4 | 1,094.4 | 8  |
| 13 | 1,658.7 | 829.9   |         | 1,640.7 | T+80  | 999.4   | 500.2   | 982.3   | 981.3   | 7  |
| 14 | 1,787.8 | 894.4   |         | 1,769.8 | E     | 818.3   | 409.7   | 801.3   | 800.3   | 6  |
| 15 | 2,030.8 | 1,015.9 |         | 2,012.8 | Y+80  | 689.3   |         | 672.3   | 671.3   | 5  |
| 16 | 2,129.9 | 1,065.4 |         | 2,111.9 | V     | 446.3   |         | 429.2   | 428.3   | 4  |
| 17 | 2,200.9 | 1,101.0 |         | 2,182.9 | A     | 347.2   |         | 330.2   | 329.2   | 3  |
| 18 | 2,302.0 | 1,151.5 |         | 2,283.9 | T     | 276.2   |         | 259.1   | 258.2   | 2  |
| 19 | 2,476.1 | 1,238.5 | 2,459.0 | 2,458.1 | R     | 175.1   |         | 158.1   |         | 1  |

# MK01\_HUMAN: VADPDHHTGFLpTEpYVATR

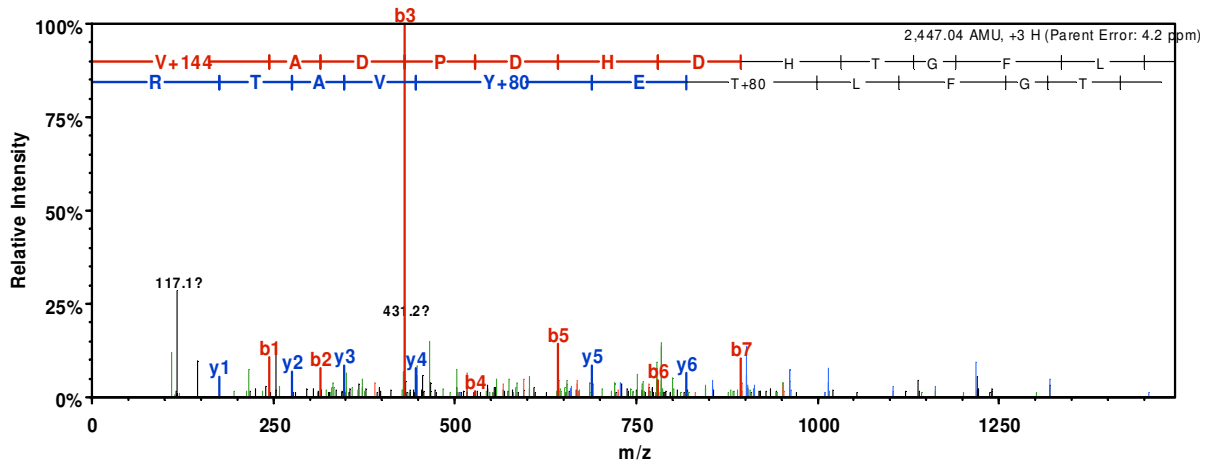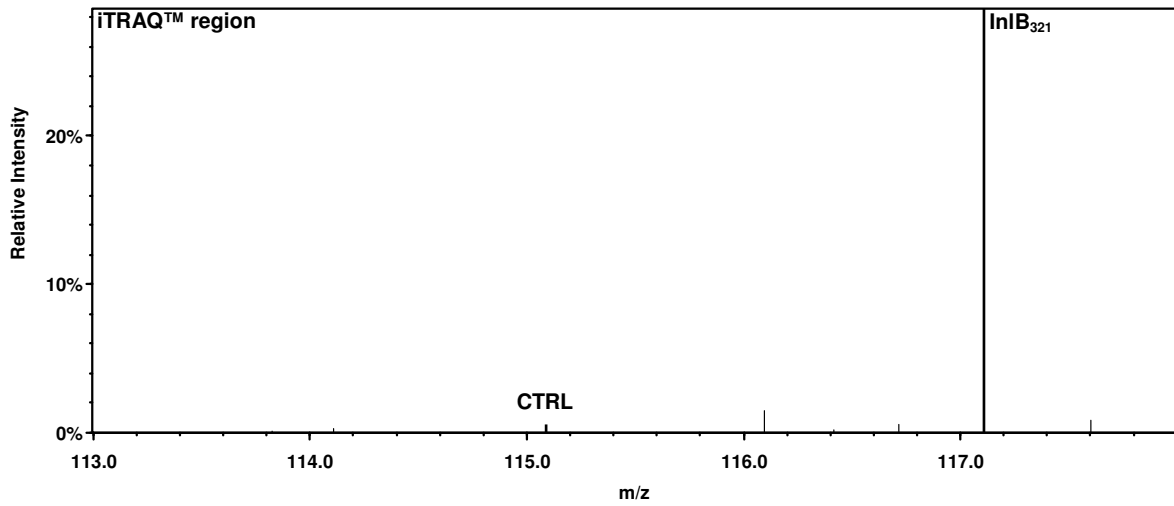

| B  | B Ions  | B+2H    | B-NH3   | B-H2O   | AA    | Y Ions  | Y+2H    | Y-NH3   | Y-H2O   | Y  |
|----|---------|---------|---------|---------|-------|---------|---------|---------|---------|----|
| 1  | 244.2   |         |         |         | V+144 | 2,448.0 | 1,224.5 | 2,431.0 | 2,430.0 | 19 |
| 2  | 315.2   |         |         |         | A     | 2,204.9 | 1,102.9 | 2,187.8 | 2,186.9 | 18 |
| 3  | 430.2   |         |         | 412.2   | D     | 2,133.8 | 1,067.4 | 2,116.8 | 2,115.8 | 17 |
| 4  | 527.3   |         |         | 509.3   | P     | 2,018.8 | 1,009.9 | 2,001.8 | 2,000.8 | 16 |
| 5  | 642.3   |         |         | 624.3   | D     | 1,921.8 | 961.4   | 1,904.7 | 1,903.7 | 15 |
| 6  | 779.4   | 390.2   |         | 761.4   | H     | 1,806.7 | 903.9   | 1,789.7 | 1,788.7 | 14 |
| 7  | 894.4   | 447.7   |         | 876.4   | D     | 1,669.7 | 835.3   | 1,652.6 | 1,651.7 | 13 |
| 8  | 1,031.5 | 516.2   |         | 1,013.5 | H     | 1,554.6 | 777.8   | 1,537.6 | 1,536.6 | 12 |
| 9  | 1,132.5 | 566.8   |         | 1,114.5 | T     | 1,417.6 | 709.3   | 1,400.6 | 1,399.6 | 11 |
| 10 | 1,189.5 | 595.3   |         | 1,171.5 | G     | 1,316.5 | 658.8   | 1,299.5 | 1,298.5 | 10 |
| 11 | 1,336.6 | 668.8   |         | 1,318.6 | F     | 1,259.5 | 630.3   | 1,242.5 | 1,241.5 | 9  |
| 12 | 1,449.7 | 725.3   |         | 1,431.7 | L     | 1,112.4 | 556.7   | 1,095.4 | 1,094.4 | 8  |
| 13 | 1,630.7 | 815.9   |         | 1,612.7 | T+80  | 999.4   | 500.2   | 982.3   | 981.3   | 7  |
| 14 | 1,759.7 | 880.4   |         | 1,741.7 | E     | 818.3   | 409.7   | 801.3   | 800.3   | 6  |
| 15 | 2,002.8 | 1,001.9 |         | 1,984.8 | Y+80  | 689.3   |         | 672.3   | 671.3   | 5  |
| 16 | 2,101.8 | 1,051.4 |         | 2,083.8 | V     | 446.3   |         | 429.2   | 428.3   | 4  |
| 17 | 2,172.9 | 1,086.9 |         | 2,154.9 | A     | 347.2   |         | 330.2   | 329.2   | 3  |
| 18 | 2,273.9 | 1,137.5 |         | 2,255.9 | T     | 276.2   |         | 259.1   | 258.2   | 2  |
| 19 | 2,448.0 | 1,224.5 | 2,431.0 | 2,430.0 | R     | 175.1   |         | 158.1   |         | 1  |

# MP2K2\_HUMAN: LNQPGTP<sub>p</sub>TR

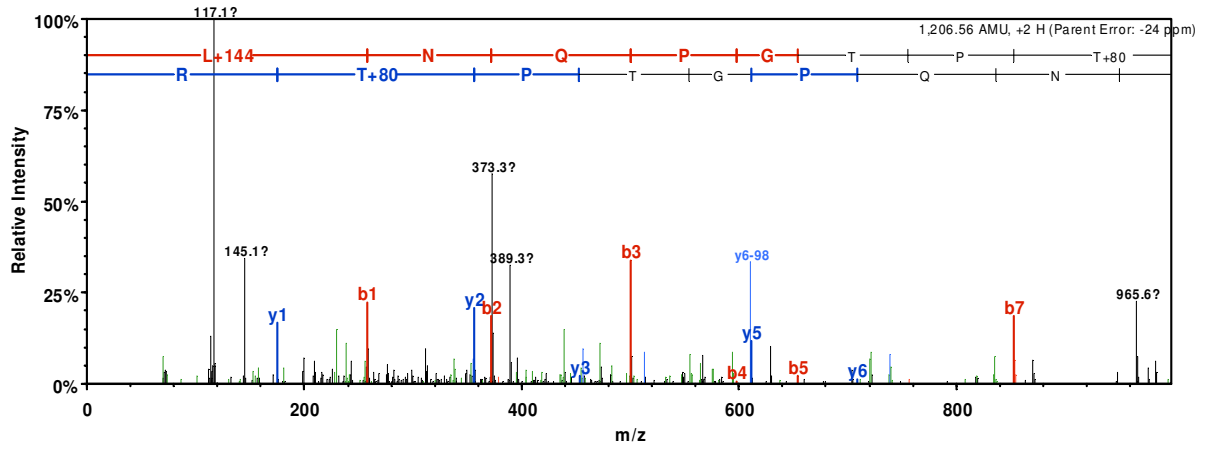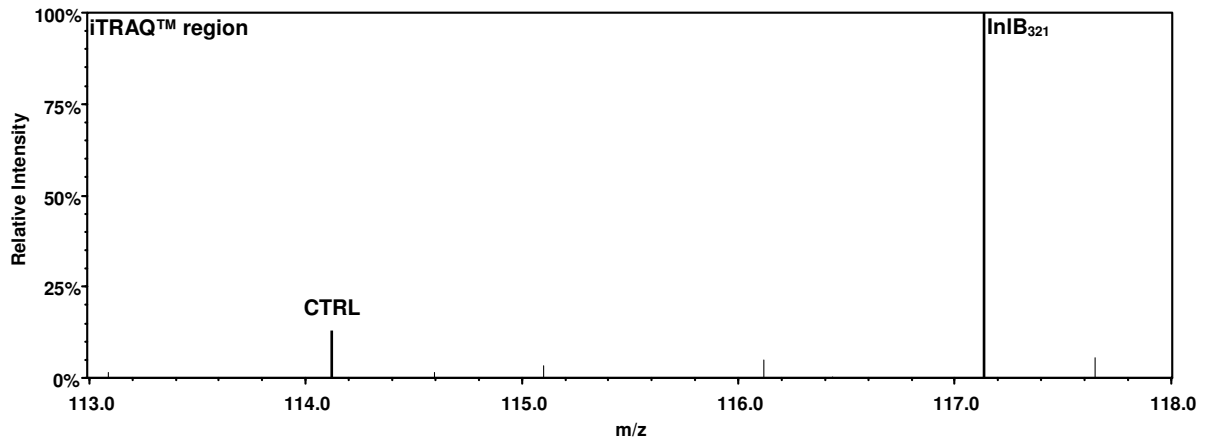

| B | B Ions  | B+2H  | B-NH3   | B-H2O   | AA    | Y Ions  | Y+2H  | Y-NH3   | Y-H2O   | Y |
|---|---------|-------|---------|---------|-------|---------|-------|---------|---------|---|
| 1 | 258.2   |       |         |         | L+144 | 1,207.6 | 604.3 | 1,190.6 | 1,189.6 | 9 |
| 2 | 372.2   |       | 355.2   |         | N     | 950.4   | 475.7 | 933.4   | 932.4   | 8 |
| 3 | 500.3   |       | 483.3   |         | Q     | 836.4   | 418.7 | 819.3   | 818.4   | 7 |
| 4 | 597.3   |       | 580.3   |         | P     | 708.3   | 354.7 | 691.3   | 690.3   | 6 |
| 5 | 654.4   |       | 637.3   |         | G     | 611.3   |       | 594.2   | 593.2   | 5 |
| 6 | 755.4   | 378.2 | 738.4   | 737.4   | T     | 554.2   |       | 537.2   | 536.2   | 4 |
| 7 | 852.5   | 426.7 | 835.4   | 834.5   | P     | 453.2   |       | 436.2   | 435.2   | 3 |
| 8 | 1,033.5 | 517.2 | 1,016.5 | 1,015.5 | T+80  | 356.1   |       | 339.1   | 338.1   | 2 |
| 9 | 1,207.6 | 604.3 | 1,190.6 | 1,189.6 | R     | 175.1   |       | 158.1   |         | 1 |

# GSK3A\_HUMAN: TS<sup>p</sup>SFAEPGGGGGGGGGGP<sup>S</sup>GGASGPGGTGGGK

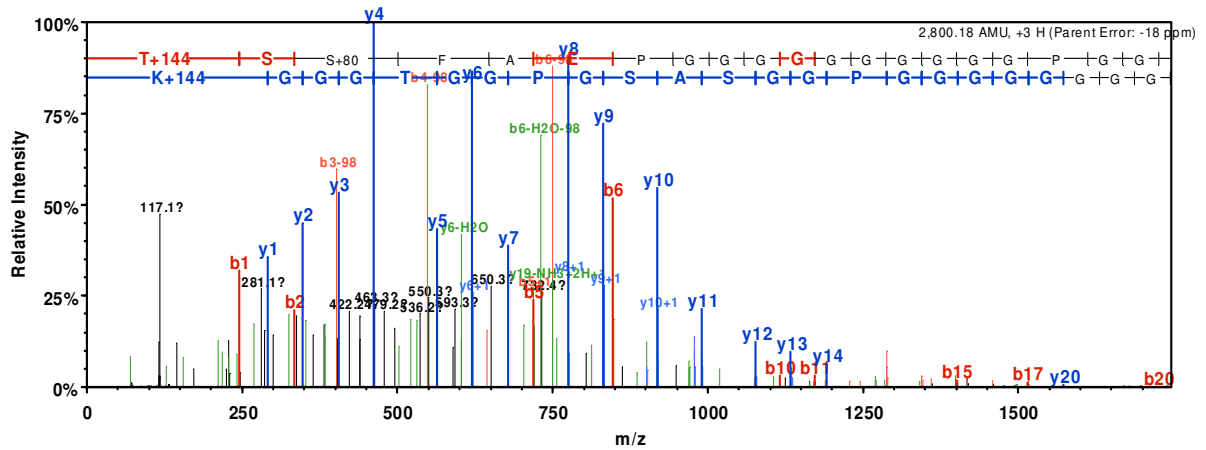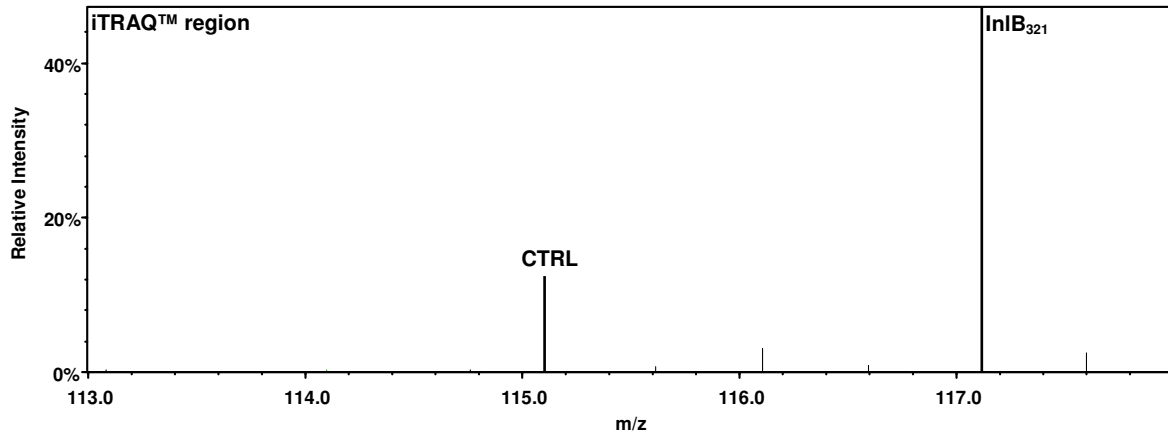

| B  | B Ions  | B+2H    | B-NH3   | B-H2O   | AA    | Y Ions  | Y+2H    | Y-NH3   | Y-H2O   | Y  |
|----|---------|---------|---------|---------|-------|---------|---------|---------|---------|----|
| 1  | 246.2   |         |         | 228.1   | T+144 | 2,801.2 | 1,401.1 | 2,784.2 | 2,783.2 | 32 |
| 2  | 333.2   |         |         | 315.2   | S     | 2,556.1 | 1,278.5 | 2,539.1 | 2,538.1 | 31 |
| 3  | 500.2   |         |         | 482.2   | S+80  | 2,469.1 | 1,235.0 | 2,452.0 | 2,451.0 | 30 |
| 4  | 647.3   |         |         | 629.2   | F     | 2,302.1 | 1,151.5 | 2,285.0 | 2,284.0 | 29 |
| 5  | 718.3   |         |         | 700.3   | A     | 2,155.0 | 1,078.0 | 2,138.0 | 2,137.0 | 28 |
| 6  | 847.3   | 424.2   |         | 829.3   | E     | 2,084.0 | 1,042.5 | 2,066.9 | 2,065.9 | 27 |
| 7  | 944.4   | 472.7   |         | 926.4   | P     | 1,954.9 | 978.0   | 1,937.9 | 1,936.9 | 26 |
| 8  | 1,001.4 | 501.2   |         | 983.4   | G     | 1,857.9 | 929.4   | 1,840.8 | 1,839.8 | 25 |
| 9  | 1,058.4 | 529.7   |         | 1,040.4 | G     | 1,800.8 | 900.9   | 1,783.8 | 1,782.8 | 24 |
| 10 | 1,115.5 | 558.2   |         | 1,097.4 | G     | 1,743.8 | 872.4   | 1,726.8 | 1,725.8 | 23 |
| 11 | 1,172.5 | 586.7   |         | 1,154.5 | G     | 1,686.8 | 843.9   | 1,669.8 | 1,668.8 | 22 |
| 12 | 1,229.5 | 615.3   |         | 1,211.5 | G     | 1,629.8 | 815.4   | 1,612.7 | 1,611.8 | 21 |
| 13 | 1,286.5 | 643.8   |         | 1,268.5 | G     | 1,572.7 | 786.9   | 1,555.7 | 1,554.7 | 20 |
| 14 | 1,343.5 | 672.3   |         | 1,325.5 | G     | 1,515.7 | 758.4   | 1,498.7 | 1,497.7 | 19 |
| 15 | 1,400.6 | 700.8   |         | 1,382.6 | G     | 1,458.7 | 729.9   | 1,441.7 | 1,440.7 | 18 |
| 16 | 1,457.6 | 729.3   |         | 1,439.6 | G     | 1,401.7 | 701.3   | 1,384.7 | 1,383.7 | 17 |
| 17 | 1,514.6 | 757.8   |         | 1,496.6 | G     | 1,344.7 | 672.8   | 1,327.6 | 1,326.7 | 16 |
| 18 | 1,611.7 | 806.3   |         | 1,593.6 | P     | 1,287.6 | 644.3   | 1,270.6 | 1,269.6 | 15 |
| 19 | 1,668.7 | 834.8   |         | 1,650.7 | G     | 1,190.6 | 595.8   | 1,173.6 | 1,172.6 | 14 |
| 20 | 1,725.7 | 863.4   |         | 1,707.7 | G     | 1,133.6 | 567.3   | 1,116.5 | 1,115.6 | 13 |
| 21 | 1,812.7 | 906.9   |         | 1,794.7 | S     | 1,076.5 | 538.8   | 1,059.5 | 1,058.5 | 12 |
| 22 | 1,883.8 | 942.4   |         | 1,865.8 | A     | 989.5   | 495.3   | 972.5   | 971.5   | 11 |
| 23 | 1,970.8 | 985.9   |         | 1,952.8 | S     | 918.5   | 459.7   | 901.5   | 900.5   | 10 |
| 24 | 2,027.8 | 1,014.4 |         | 2,009.8 | G     | 831.4   | 416.2   | 814.4   | 813.4   | 9  |
| 25 | 2,124.9 | 1,062.9 |         | 2,106.9 | P     | 774.4   | 387.7   | 757.4   | 756.4   | 8  |
| 26 | 2,181.9 | 1,091.5 |         | 2,163.9 | G     | 677.4   | 339.2   | 660.3   | 659.4   | 7  |
| 27 | 2,238.9 | 1,120.0 |         | 2,220.9 | G     | 620.3   | 310.7   | 603.3   | 602.3   | 6  |
| 28 | 2,340.0 | 1,170.5 |         | 2,322.0 | T     | 563.3   |         | 546.3   | 545.3   | 5  |
| 29 | 2,397.0 | 1,199.0 |         | 2,379.0 | G     | 462.3   |         | 445.3   |         | 4  |
| 30 | 2,454.0 | 1,227.5 |         | 2,436.0 | G     | 405.3   |         | 388.2   |         | 3  |
| 31 | 2,511.0 | 1,256.0 |         | 2,493.0 | G     | 348.2   |         | 331.2   |         | 2  |
| 32 | 2,801.2 | 1,401.1 | 2,784.2 | 2,783.2 | K+144 | 291.2   |         | 274.2   |         | 1  |

# GSK3B\_HUMAN: TTpSFAESCKPVQQPSAFGSMK

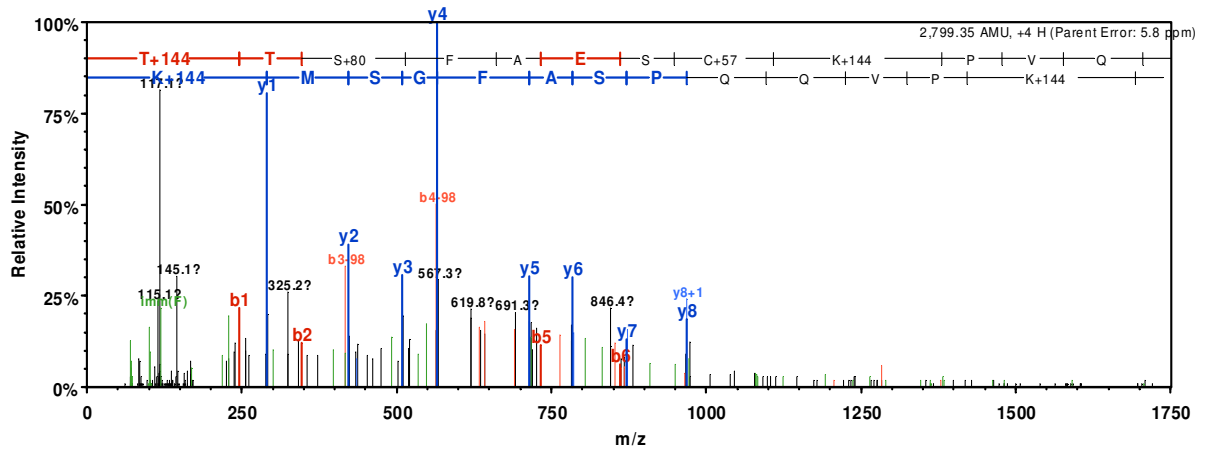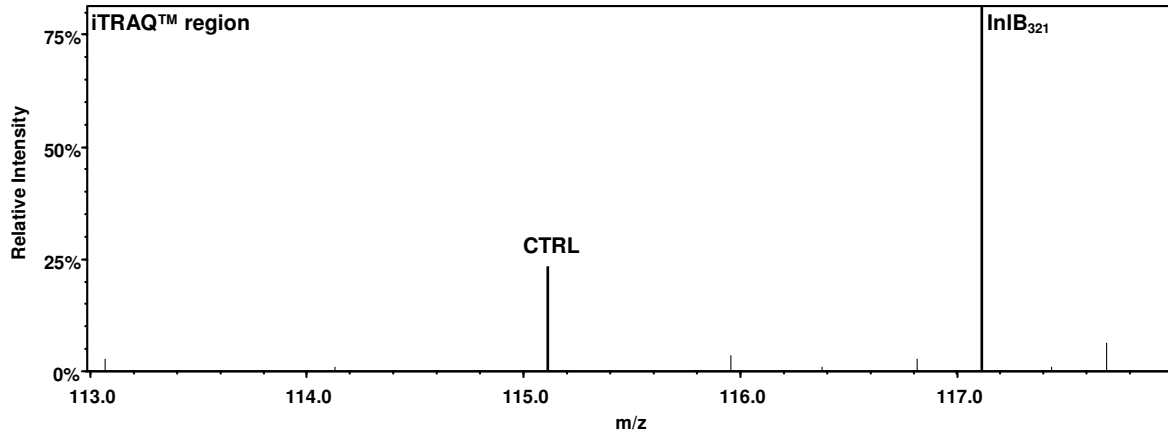

| B  | B Ions  | B+2H    | B-NH3   | B-H2O   | AA    | Y Ions  | Y+2H    | Y-NH3   | Y-H2O   | Y  |
|----|---------|---------|---------|---------|-------|---------|---------|---------|---------|----|
| 1  | 246.2   |         |         | 228.1   | T+144 | 2,800.3 | 1,400.7 | 2,783.3 | 2,782.3 | 21 |
| 2  | 347.2   |         |         | 329.2   | T     | 2,555.2 | 1,278.1 | 2,538.2 | 2,537.2 | 20 |
| 3  | 514.2   |         |         | 496.2   | S+80  | 2,454.1 | 1,227.6 | 2,437.1 | 2,436.1 | 19 |
| 4  | 661.3   |         |         | 643.3   | F     | 2,287.1 | 1,144.1 | 2,270.1 | 2,269.1 | 18 |
| 5  | 732.3   |         |         | 714.3   | A     | 2,140.1 | 1,070.5 | 2,123.1 | 2,122.1 | 17 |
| 6  | 861.4   | 431.2   |         | 843.3   | E     | 2,069.0 | 1,035.0 | 2,052.0 | 2,051.0 | 16 |
| 7  | 948.4   | 474.7   |         | 930.4   | S     | 1,940.0 | 970.5   | 1,923.0 | 1,922.0 | 15 |
| 8  | 1,108.4 | 554.7   |         | 1,090.4 | C+57  | 1,853.0 | 927.0   | 1,835.9 | 1,835.0 | 14 |
| 9  | 1,380.6 | 690.8   | 1,363.6 | 1,362.6 | K+144 | 1,692.9 | 847.0   | 1,675.9 | 1,674.9 | 13 |
| 10 | 1,477.7 | 739.3   | 1,460.6 | 1,459.7 | P     | 1,420.7 | 710.9   | 1,403.7 | 1,402.7 | 12 |
| 11 | 1,576.7 | 788.9   | 1,559.7 | 1,558.7 | V     | 1,323.7 | 662.3   | 1,306.7 | 1,305.7 | 11 |
| 12 | 1,704.8 | 852.9   | 1,687.8 | 1,686.8 | Q     | 1,224.6 | 612.8   | 1,207.6 | 1,206.6 | 10 |
| 13 | 1,832.8 | 916.9   | 1,815.8 | 1,814.8 | Q     | 1,096.6 | 548.8   | 1,079.5 | 1,078.5 | 9  |
| 14 | 1,929.9 | 965.5   | 1,912.9 | 1,911.9 | P     | 968.5   | 484.8   | 951.5   | 950.5   | 8  |
| 15 | 2,016.9 | 1,009.0 | 1,999.9 | 1,998.9 | S     | 871.4   | 436.2   | 854.4   | 853.4   | 7  |
| 16 | 2,088.0 | 1,044.5 | 2,070.9 | 2,070.0 | A     | 784.4   | 392.7   | 767.4   | 766.4   | 6  |
| 17 | 2,235.0 | 1,118.0 | 2,218.0 | 2,217.0 | F     | 713.4   |         | 696.4   | 695.4   | 5  |
| 18 | 2,292.1 | 1,146.5 | 2,275.0 | 2,274.1 | G     | 566.3   |         | 549.3   | 548.3   | 4  |
| 19 | 2,379.1 | 1,190.1 | 2,362.1 | 2,361.1 | S     | 509.3   |         | 492.3   | 491.3   | 3  |
| 20 | 2,510.1 | 1,255.6 | 2,493.1 | 2,492.1 | M     | 422.3   |         | 405.2   |         | 2  |
| 21 | 2,800.3 | 1,400.7 | 2,783.3 | 2,782.3 | K+144 | 291.2   |         | 274.2   |         | 1  |

# NEK9\_HUMAN: SS<sup>p</sup>TVTEAPIAVVTSR

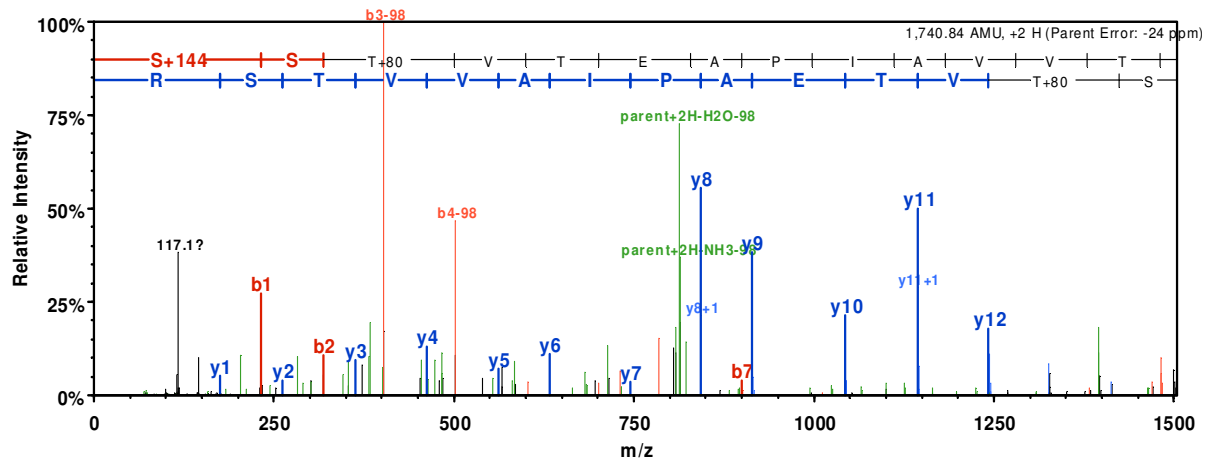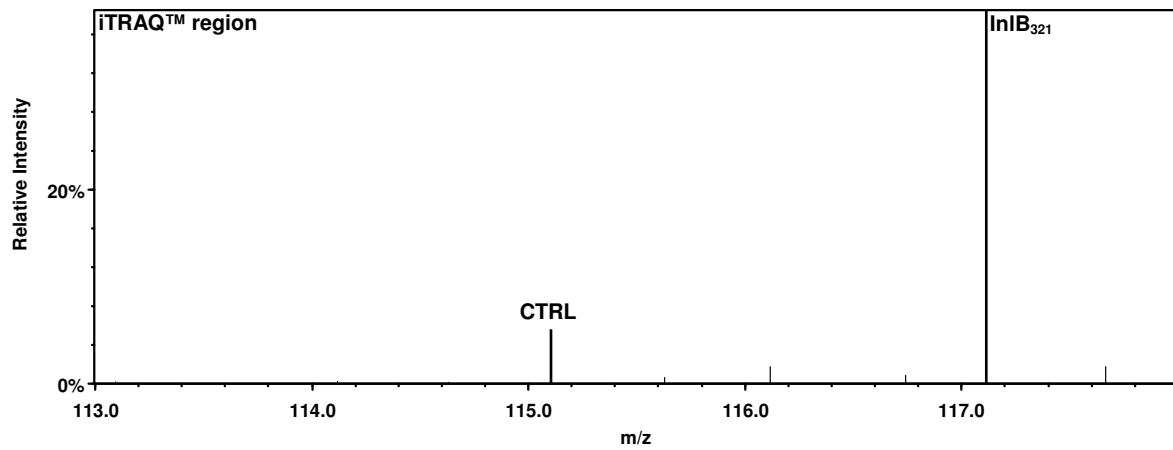

| B  | B Ions  | B+2H  | B-NH3   | B-H2O   | AA    | Y Ions  | Y+2H  | Y-NH3   | Y-H2O   | Y  |
|----|---------|-------|---------|---------|-------|---------|-------|---------|---------|----|
| 1  | 232.1   |       |         | 214.1   | S+144 | 1,741.9 | 871.4 | 1,724.9 | 1,723.9 | 15 |
| 2  | 319.2   |       |         | 301.2   | S     | 1,510.8 | 755.9 | 1,493.7 | 1,492.7 | 14 |
| 3  | 500.2   |       |         | 482.2   | T+80  | 1,423.7 | 712.4 | 1,406.7 | 1,405.7 | 13 |
| 4  | 599.3   |       |         | 581.2   | V     | 1,242.7 | 621.9 | 1,225.7 | 1,224.7 | 12 |
| 5  | 700.3   |       |         | 682.3   | T     | 1,143.6 | 572.3 | 1,126.6 | 1,125.6 | 11 |
| 6  | 829.3   | 415.2 |         | 811.3   | E     | 1,042.6 | 521.8 | 1,025.6 | 1,024.6 | 10 |
| 7  | 900.4   | 450.7 |         | 882.4   | A     | 913.5   | 457.3 | 896.5   | 895.5   | 9  |
| 8  | 997.4   | 499.2 |         | 979.4   | P     | 842.5   | 421.8 | 825.5   | 824.5   | 8  |
| 9  | 1,110.5 | 555.8 |         | 1,092.5 | I     | 745.5   | 373.2 | 728.4   | 727.4   | 7  |
| 10 | 1,181.6 | 591.3 |         | 1,163.5 | A     | 632.4   | 316.7 | 615.3   | 614.4   | 6  |
| 11 | 1,280.6 | 640.8 |         | 1,262.6 | V     | 561.3   |       | 544.3   | 543.3   | 5  |
| 12 | 1,379.7 | 690.4 |         | 1,361.7 | V     | 462.3   |       | 445.2   | 444.3   | 4  |
| 13 | 1,480.7 | 740.9 |         | 1,462.7 | T     | 363.2   |       | 346.2   | 345.2   | 3  |
| 14 | 1,567.8 | 784.4 |         | 1,549.8 | S     | 262.2   |       | 245.1   | 244.1   | 2  |
| 15 | 1,741.9 | 871.4 | 1,724.9 | 1,723.9 | R     | 175.1   |       | 158.1   |         | 1  |

# AAPK1\_HUMAN: SGpSVSNYR

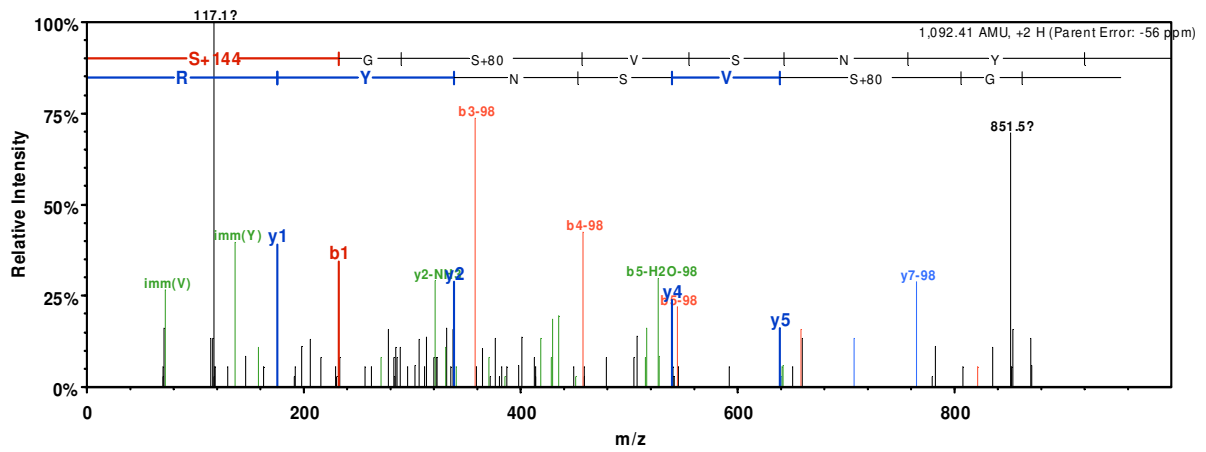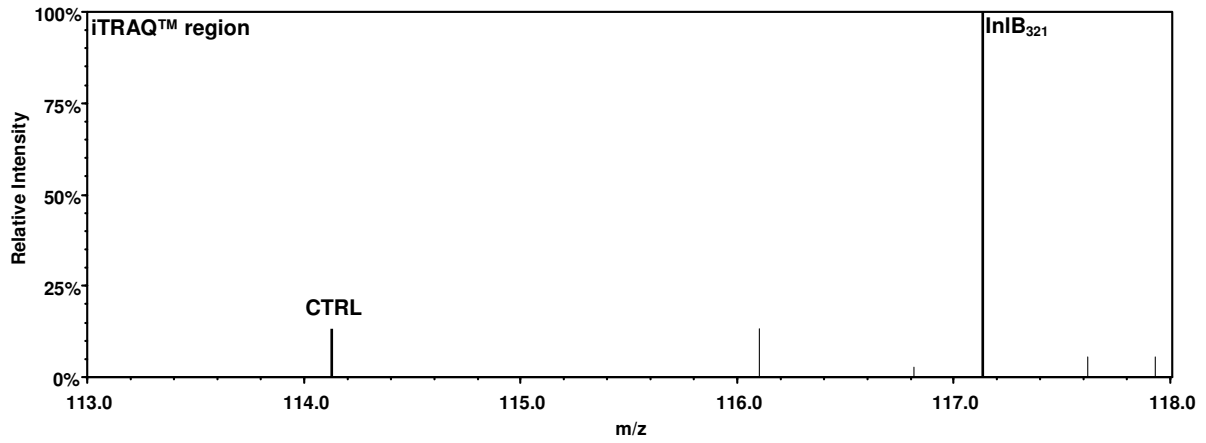

| B | B Ions  | B+2H  | B-NH3   | B-H2O   | AA    | Y Ions  | Y+2H  | Y-NH3   | Y-H2O   | Y |
|---|---------|-------|---------|---------|-------|---------|-------|---------|---------|---|
| 1 | 232.1   |       |         | 214.1   | S+144 | 1,093.5 | 547.2 | 1,076.5 | 1,075.5 | 8 |
| 2 | 289.2   |       |         | 271.2   | G     | 862.3   | 431.7 | 845.3   | 844.3   | 7 |
| 3 | 456.2   |       |         | 438.2   | S+80  | 805.3   | 403.2 | 788.3   | 787.3   | 6 |
| 4 | 555.2   |       |         | 537.2   | V     | 638.3   |       | 621.3   | 620.3   | 5 |
| 5 | 642.3   |       |         | 624.3   | S     | 539.3   |       | 522.2   | 521.2   | 4 |
| 6 | 756.3   | 378.7 | 739.3   | 738.3   | N     | 452.2   |       | 435.2   |         | 3 |
| 7 | 919.4   | 460.2 | 902.3   | 901.4   | Y     | 338.2   |       | 321.2   |         | 2 |
| 8 | 1,093.5 | 547.2 | 1,076.5 | 1,075.5 | R     | 175.1   |       | 158.1   |         | 1 |



# CDKL5\_HUMAN: DLTNNNIPHLLpSPK

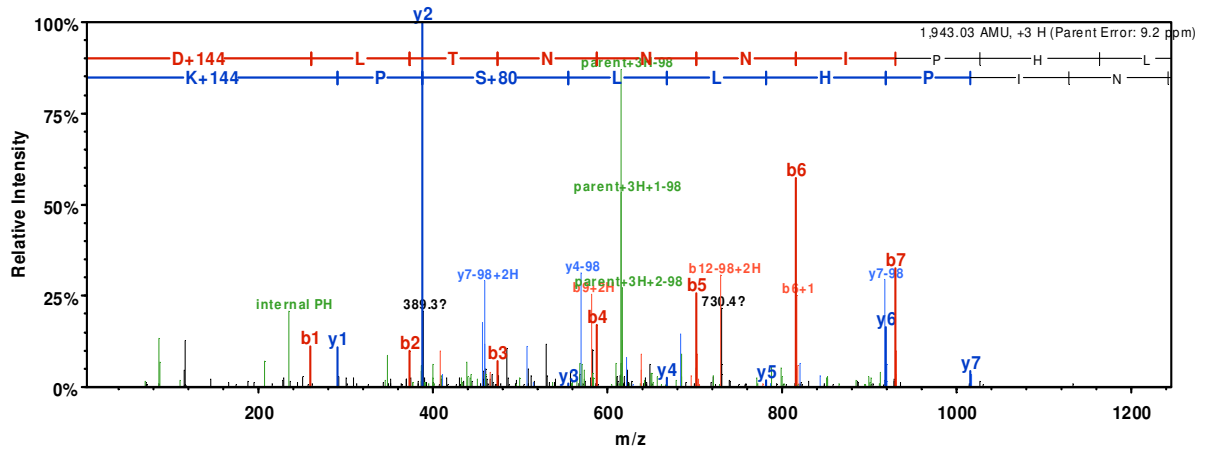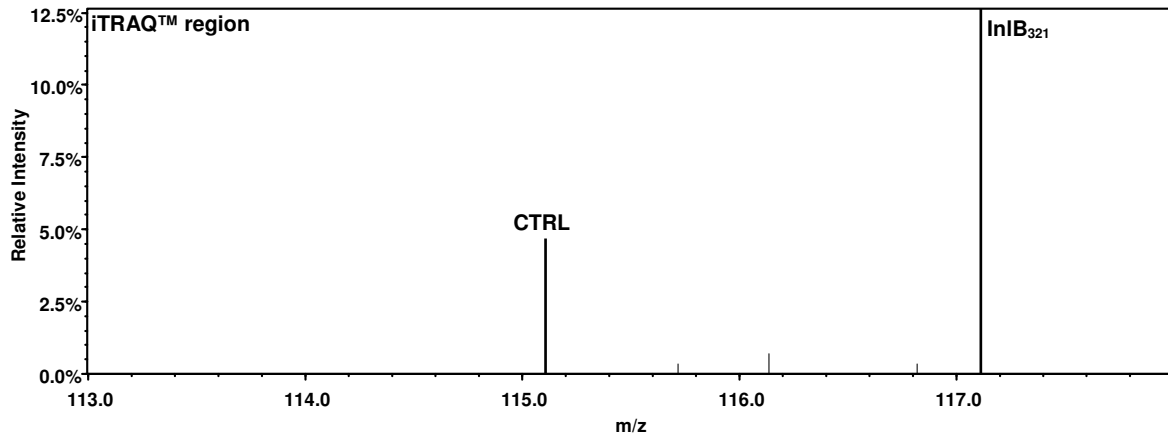

| B  | B Ions  | B+2H  | B-NH3   | B-H2O   | AA    | Y Ions  | Y+2H  | Y-NH3   | Y-H2O   | Y  |
|----|---------|-------|---------|---------|-------|---------|-------|---------|---------|----|
| 1  | 260.1   |       |         | 242.1   | D+144 | 1,944.0 | 972.5 | 1,927.0 | 1,926.0 | 14 |
| 2  | 373.2   |       |         | 355.2   | L     | 1,684.9 | 842.9 | 1,667.9 | 1,666.9 | 13 |
| 3  | 474.3   |       |         | 456.3   | T     | 1,571.8 | 786.4 | 1,554.8 | 1,553.8 | 12 |
| 4  | 588.3   |       | 571.3   | 570.3   | N     | 1,470.8 | 735.9 | 1,453.7 | 1,452.7 | 11 |
| 5  | 702.4   |       | 685.3   | 684.3   | N     | 1,356.7 | 678.9 | 1,339.7 | 1,338.7 | 10 |
| 6  | 816.4   | 408.7 | 799.4   | 798.4   | N     | 1,242.7 | 621.8 | 1,225.6 | 1,224.7 | 9  |
| 7  | 929.5   | 465.2 | 912.5   | 911.5   | I     | 1,128.6 | 564.8 | 1,111.6 | 1,110.6 | 8  |
| 8  | 1,026.5 | 513.8 | 1,009.5 | 1,008.5 | P     | 1,015.5 | 508.3 | 998.5   | 997.5   | 7  |
| 9  | 1,163.6 | 582.3 | 1,146.6 | 1,145.6 | H     | 918.5   | 459.8 | 901.5   | 900.5   | 6  |
| 10 | 1,276.7 | 638.8 | 1,259.7 | 1,258.7 | L     | 781.4   |       | 764.4   | 763.4   | 5  |
| 11 | 1,389.8 | 695.4 | 1,372.7 | 1,371.8 | L     | 668.4   |       | 651.3   | 650.3   | 4  |
| 12 | 1,556.8 | 778.9 | 1,539.7 | 1,538.7 | S+80  | 555.3   |       | 538.2   | 537.3   | 3  |
| 13 | 1,653.8 | 827.4 | 1,636.8 | 1,635.8 | P     | 388.3   |       | 371.2   |         | 2  |
| 14 | 1,944.0 | 972.5 | 1,927.0 | 1,926.0 | K+144 | 291.2   |       | 274.2   |         | 1  |

# KS6A3\_HUMAN: KIpTSTAL

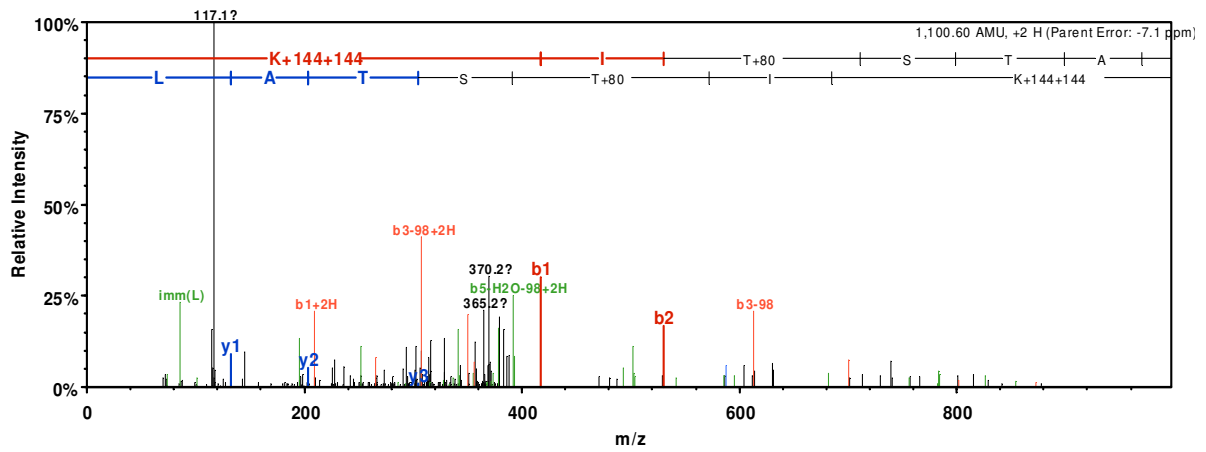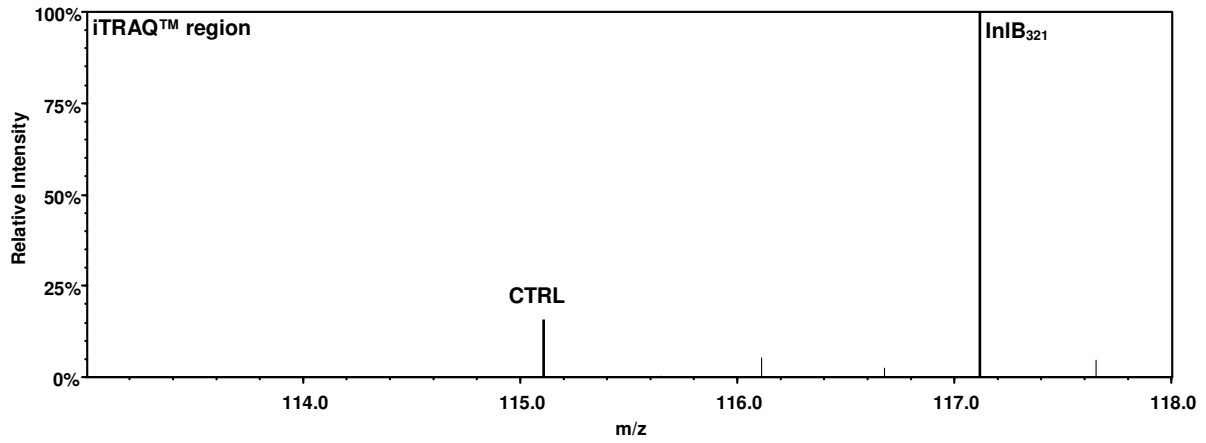

| B | B Ions  | B+2H  | B-NH3   | B-H2O   | AA    | Y Ions  | Y+2H  | Y-NH3   | Y-H2O   | Y |
|---|---------|-------|---------|---------|-------|---------|-------|---------|---------|---|
| 1 | 417.3   | 209.2 | 400.3   |         | K+288 | 1,101.6 | 551.3 | 1,084.6 | 1,083.6 | 7 |
| 2 | 530.4   | 265.7 | 513.4   |         | I     | 685.3   |       |         | 667.3   | 6 |
| 3 | 711.4   | 356.2 | 694.4   | 693.4   | T+80  | 572.2   |       |         | 554.2   | 5 |
| 4 | 798.4   | 399.7 | 781.4   | 780.4   | S     | 391.2   |       |         | 373.2   | 4 |
| 5 | 899.5   | 450.2 | 882.5   | 881.5   | T     | 304.2   |       |         | 286.2   | 3 |
| 6 | 970.5   | 485.8 | 953.5   | 952.5   | A     | 203.1   |       |         |         | 2 |
| 7 | 1,101.6 | 551.3 | 1,084.6 | 1,083.6 | L     | 132.1   |       |         |         | 1 |

**MARK2\_HUMAN: LDpTFCGSPPYAAPELFQGK**  
(homolog in MARK1\_HUMAN and MARK3\_HUMAN)

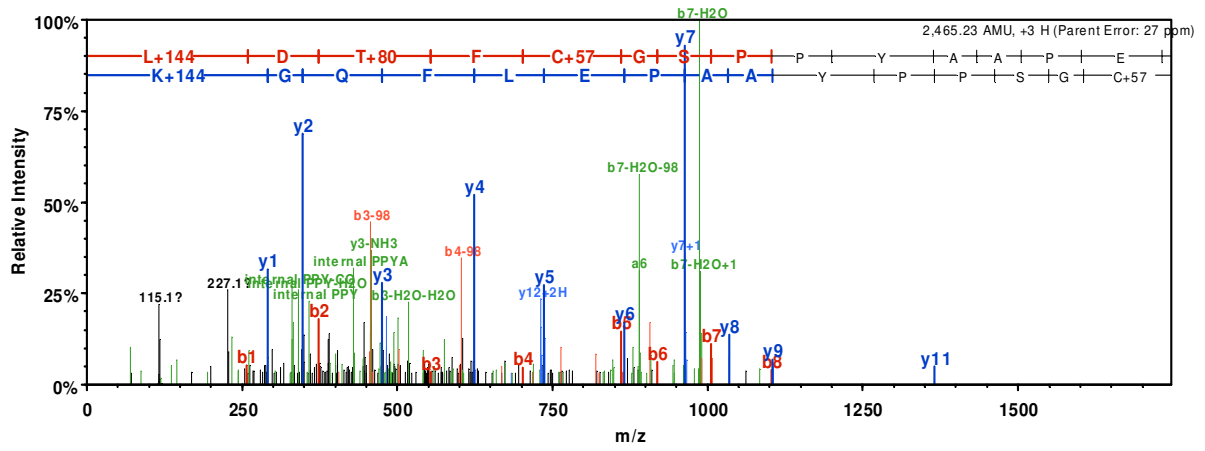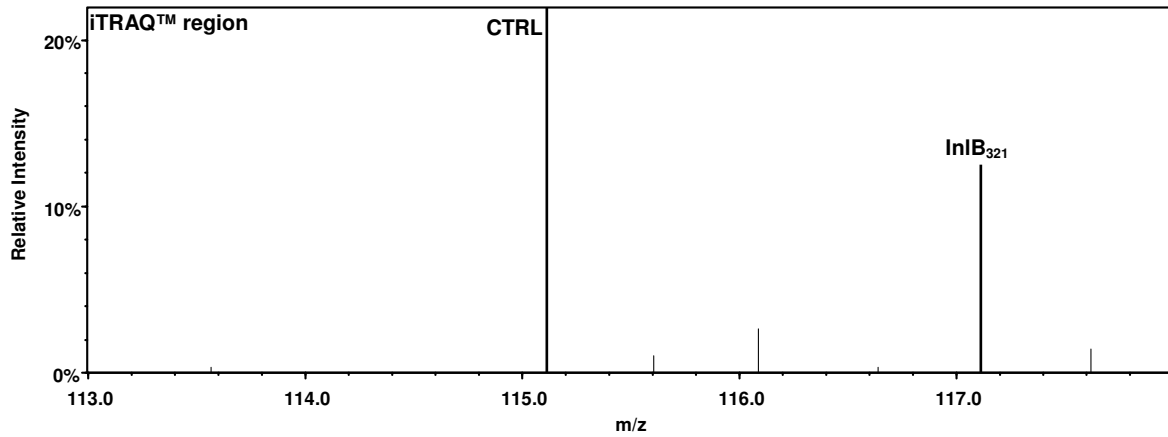

| B  | B Ions  | B+2H    | B-NH3   | B-H2O   | AA    | Y Ions  | Y+2H    | Y-NH3   | Y-H2O   | Y  |
|----|---------|---------|---------|---------|-------|---------|---------|---------|---------|----|
| 1  | 258.2   |         |         |         | L+144 | 2,466.2 | 1,233.6 | 2,449.1 | 2,448.2 | 19 |
| 2  | 373.2   |         |         | 355.2   | D     | 2,209.0 | 1,105.0 | 2,192.0 | 2,191.0 | 18 |
| 3  | 554.2   |         |         | 536.2   | T+80  | 2,094.0 | 1,047.5 | 2,076.9 | 2,075.9 | 17 |
| 4  | 701.3   |         |         | 683.3   | F     | 1,912.9 | 957.0   | 1,895.9 | 1,894.9 | 16 |
| 5  | 861.3   |         |         | 843.3   | C+57  | 1,765.9 | 883.4   | 1,748.8 | 1,747.9 | 15 |
| 6  | 918.4   | 459.7   |         | 900.3   | G     | 1,605.8 | 803.4   | 1,588.8 | 1,587.8 | 14 |
| 7  | 1,005.4 | 503.2   |         | 987.4   | S     | 1,548.8 | 774.9   | 1,531.8 | 1,530.8 | 13 |
| 8  | 1,102.4 | 551.7   |         | 1,084.4 | P     | 1,461.8 | 731.4   | 1,444.8 | 1,443.8 | 12 |
| 9  | 1,199.5 | 600.3   |         | 1,181.5 | P     | 1,364.7 | 682.9   | 1,347.7 | 1,346.7 | 11 |
| 10 | 1,362.6 | 681.8   |         | 1,344.5 | Y     | 1,267.7 | 634.3   | 1,250.7 | 1,249.7 | 10 |
| 11 | 1,433.6 | 717.3   |         | 1,415.6 | A     | 1,104.6 | 552.8   | 1,087.6 | 1,086.6 | 9  |
| 12 | 1,504.6 | 752.8   |         | 1,486.6 | A     | 1,033.6 | 517.3   | 1,016.6 | 1,015.6 | 8  |
| 13 | 1,601.7 | 801.3   |         | 1,583.7 | P     | 962.5   | 481.8   | 945.5   | 944.5   | 7  |
| 14 | 1,730.7 | 865.9   |         | 1,712.7 | E     | 865.5   | 433.2   | 848.5   | 847.5   | 6  |
| 15 | 1,843.8 | 922.4   |         | 1,825.8 | L     | 736.4   |         | 719.4   |         | 5  |
| 16 | 1,990.9 | 995.9   |         | 1,972.9 | F     | 623.4   |         | 606.3   |         | 4  |
| 17 | 2,118.9 | 1,060.0 | 2,101.9 | 2,100.9 | Q     | 476.3   |         | 459.3   |         | 3  |
| 18 | 2,176.0 | 1,088.5 | 2,158.9 | 2,157.9 | G     | 348.2   |         | 331.2   |         | 2  |
| 19 | 2,466.2 | 1,233.6 | 2,449.1 | 2,448.2 | K+144 | 291.2   |         | 274.2   |         | 1  |

# FYN\_HUMAN: LIEDNEpYTAR

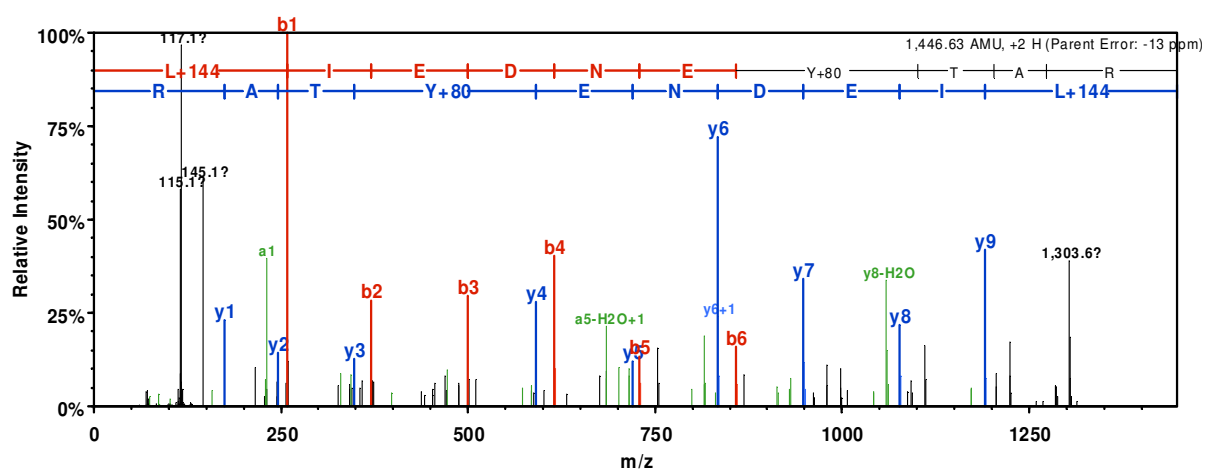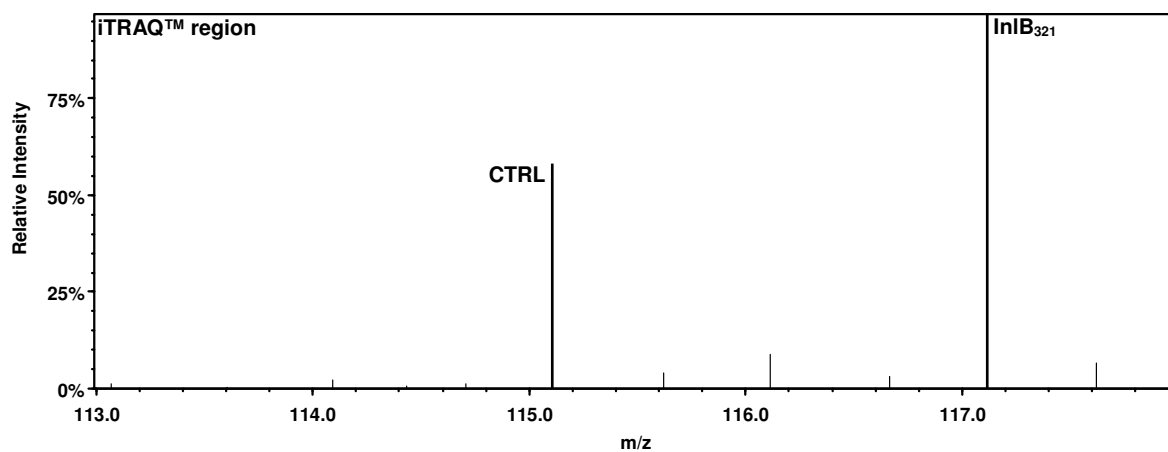

| B  | B Ions  | B+2H  | B-NH3   | B-H2O   | AA    | Y Ions  | Y+2H  | Y-NH3   | Y-H2O   | Y  |
|----|---------|-------|---------|---------|-------|---------|-------|---------|---------|----|
| 1  | 258.2   |       |         |         | L+144 | 1,447.7 | 724.3 | 1,430.6 | 1,429.6 | 10 |
| 2  | 371.3   |       |         |         | I     | 1,190.5 | 595.7 | 1,173.4 | 1,172.5 | 9  |
| 3  | 500.3   |       |         | 482.3   | E     | 1,077.4 | 539.2 | 1,060.4 | 1,059.4 | 8  |
| 4  | 615.3   |       |         | 597.3   | D     | 948.3   | 474.7 | 931.3   | 930.3   | 7  |
| 5  | 729.4   |       | 712.4   | 711.4   | N     | 833.3   | 417.2 | 816.3   | 815.3   | 6  |
| 6  | 858.4   | 429.7 | 841.4   | 840.4   | E     | 719.3   |       | 702.2   | 701.3   | 5  |
| 7  | 1,101.5 | 551.2 | 1,084.4 | 1,083.5 | Y+80  | 590.2   |       | 573.2   | 572.2   | 4  |
| 8  | 1,202.5 | 601.8 | 1,185.5 | 1,184.5 | T     | 347.2   |       | 330.2   | 329.2   | 3  |
| 9  | 1,273.5 | 637.3 | 1,256.5 | 1,255.5 | A     | 246.2   |       | 229.1   |         | 2  |
| 10 | 1,447.7 | 724.3 | 1,430.6 | 1,429.6 | R     | 175.1   |       | 158.1   |         | 1  |

# KC1D\_HUMAN: GAPVNIpSSSDLTGR

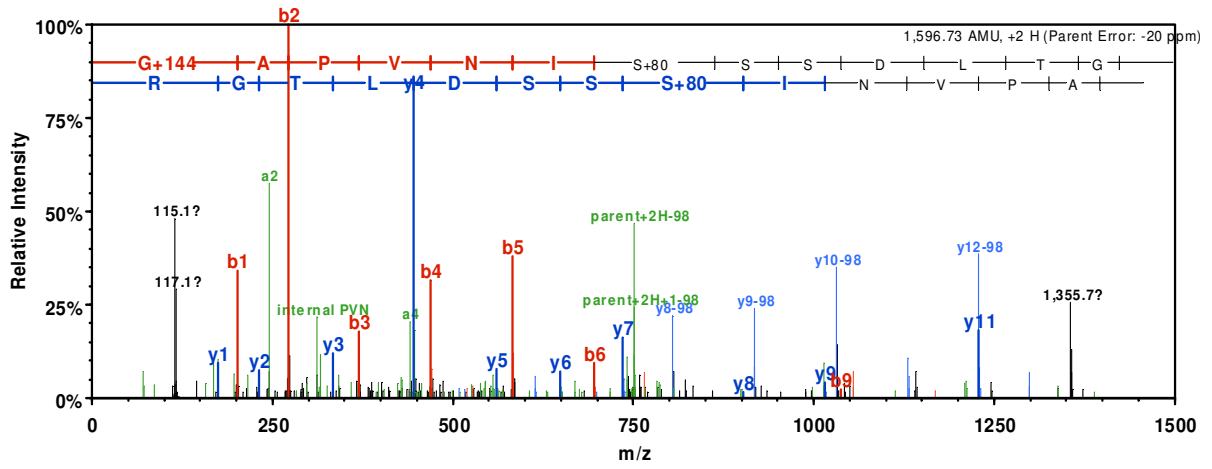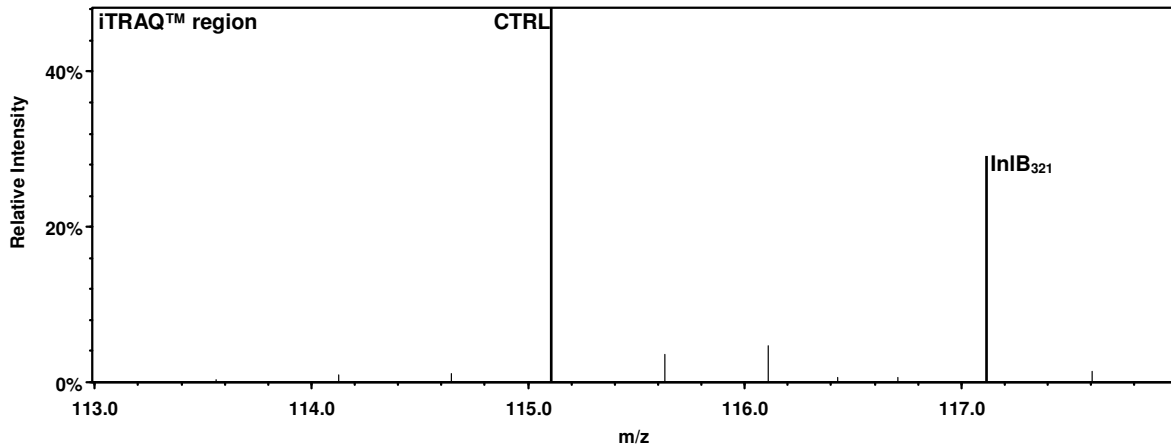

| B  | B Ions  | B+2H  | B-NH3   | B-H2O   | AA    | Y Ions  | Y+2H  | Y-NH3   | Y-H2O   | Y  |
|----|---------|-------|---------|---------|-------|---------|-------|---------|---------|----|
| 1  | 202.1   |       |         |         | G+144 | 1,597.8 | 799.4 | 1,580.7 | 1,579.8 | 14 |
| 2  | 273.2   |       |         |         | A     | 1,396.6 | 698.8 | 1,379.6 | 1,378.6 | 13 |
| 3  | 370.2   |       |         |         | P     | 1,325.6 | 663.3 | 1,308.6 | 1,307.6 | 12 |
| 4  | 469.3   |       |         |         | V     | 1,228.6 | 614.8 | 1,211.5 | 1,210.5 | 11 |
| 5  | 583.3   |       | 566.3   |         | N     | 1,129.5 | 565.2 | 1,112.5 | 1,111.5 | 10 |
| 6  | 696.4   | 348.7 | 679.4   |         | I     | 1,015.4 | 508.2 | 998.4   | 997.4   | 9  |
| 7  | 863.4   | 432.2 | 846.4   | 845.4   | S+80  | 902.4   | 451.7 | 885.3   | 884.4   | 8  |
| 8  | 950.4   | 475.7 | 933.4   | 932.4   | S     | 735.4   | 368.2 | 718.3   | 717.4   | 7  |
| 9  | 1,037.5 | 519.2 | 1,020.5 | 1,019.5 | S     | 648.3   | 324.7 | 631.3   | 630.3   | 6  |
| 10 | 1,152.5 | 576.8 | 1,135.5 | 1,134.5 | D     | 561.3   |       | 544.3   | 543.3   | 5  |
| 11 | 1,265.6 | 633.3 | 1,248.6 | 1,247.6 | L     | 446.3   |       | 429.2   | 428.3   | 4  |
| 12 | 1,366.6 | 683.8 | 1,349.6 | 1,348.6 | T     | 333.2   |       | 316.2   | 315.2   | 3  |
| 13 | 1,423.7 | 712.3 | 1,406.6 | 1,405.6 | G     | 232.1   |       | 215.1   |         | 2  |
| 14 | 1,597.8 | 799.4 | 1,580.7 | 1,579.8 | R     | 175.1   |       | 158.1   |         | 1  |

**B. Likelihood curve graphics of InI<sub>B321</sub> regulated phosphopeptides from protein kinases according to table 1.**

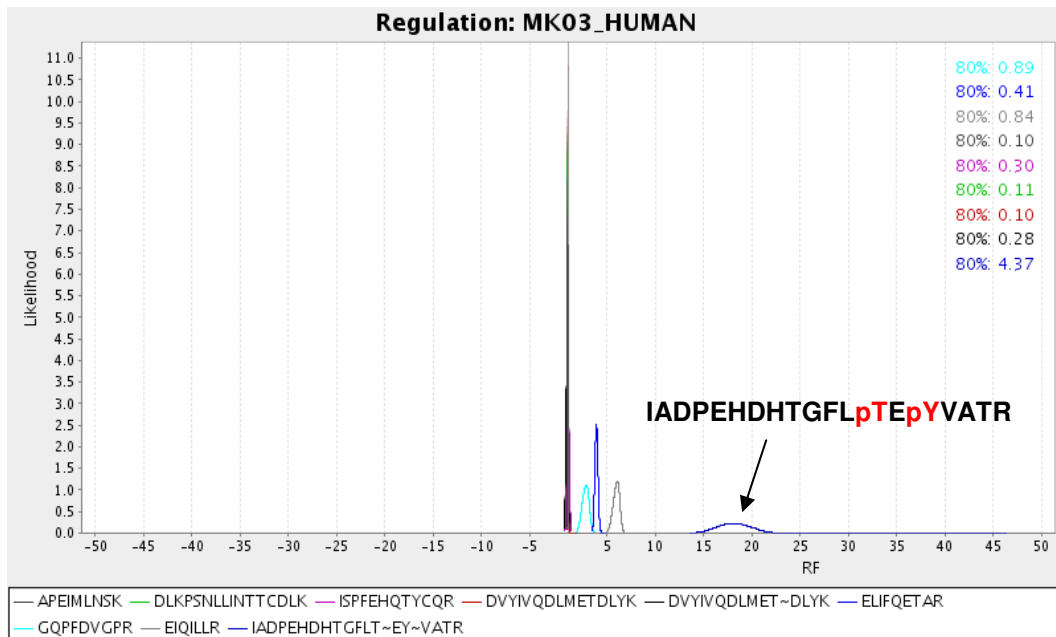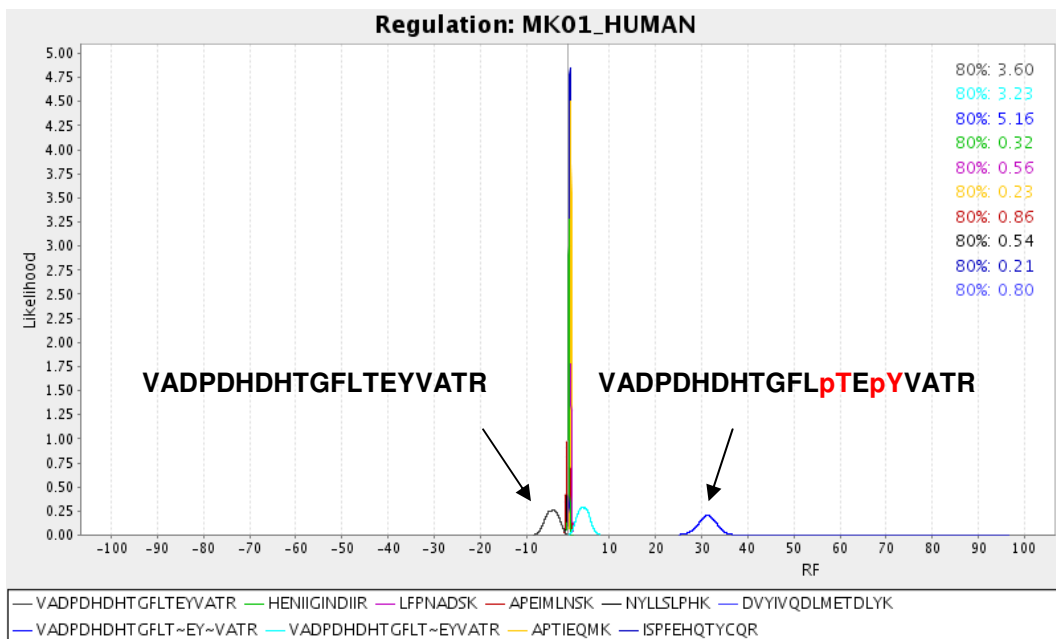

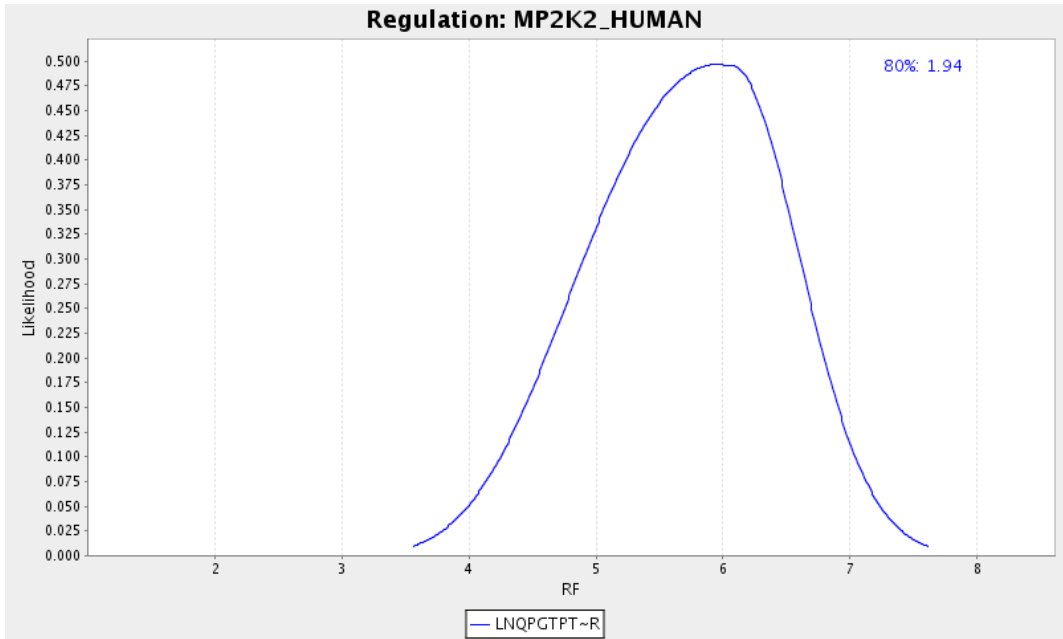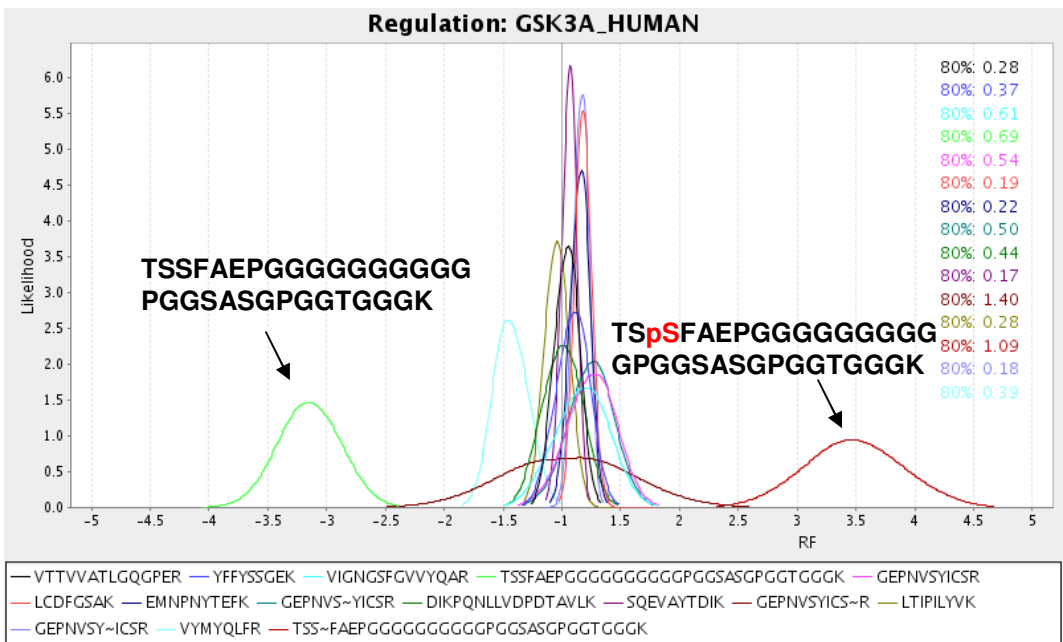

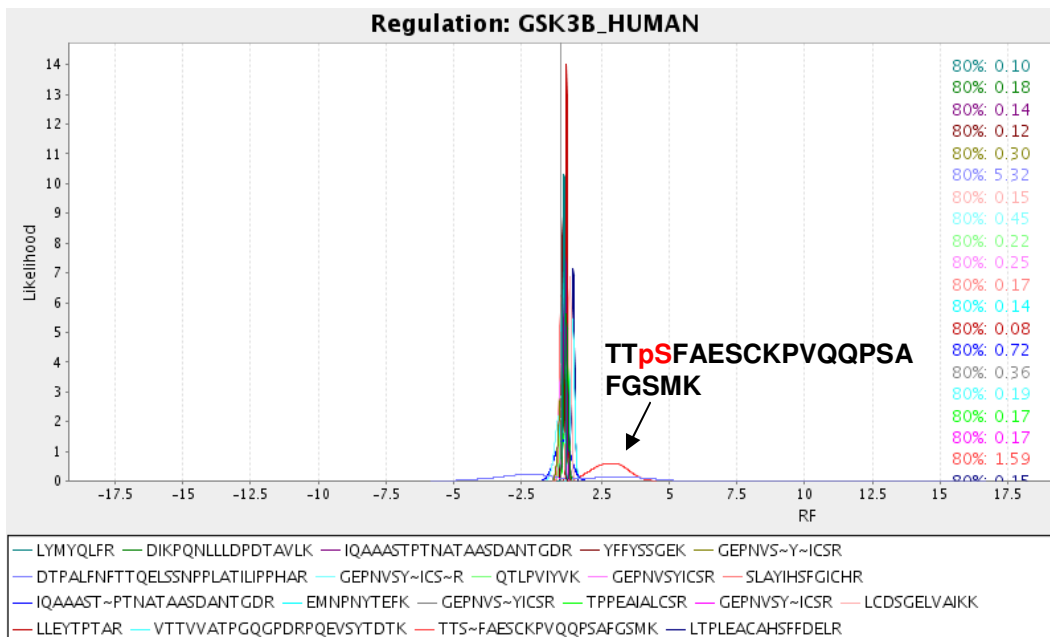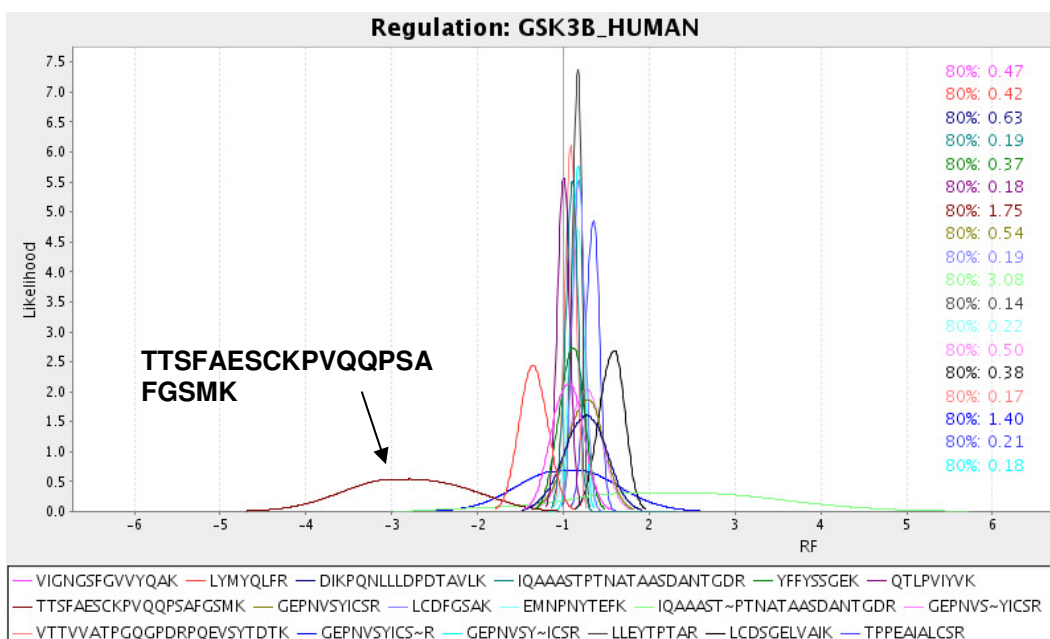



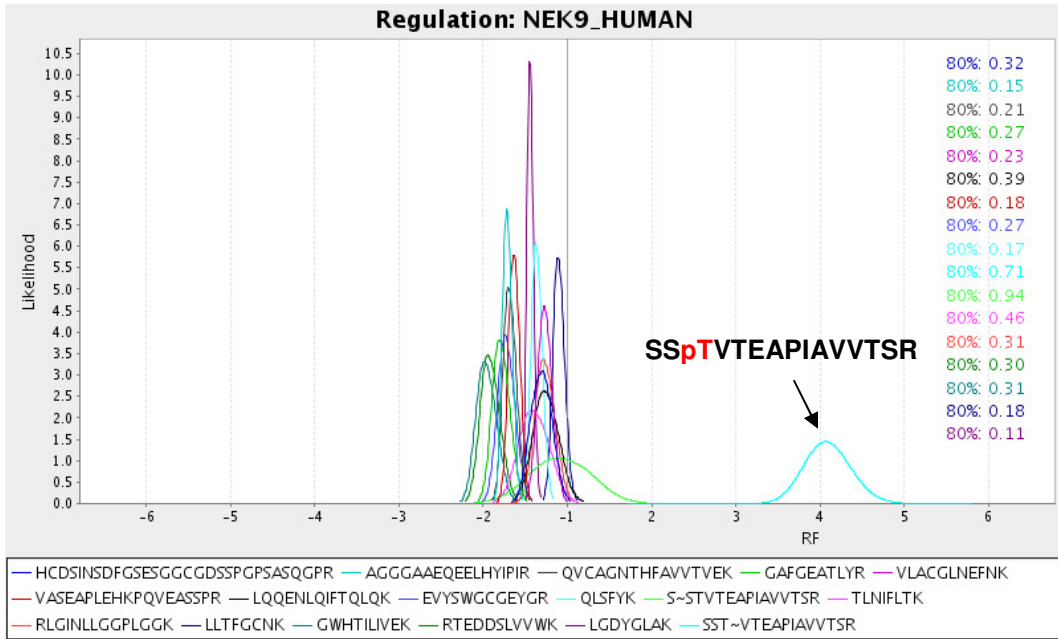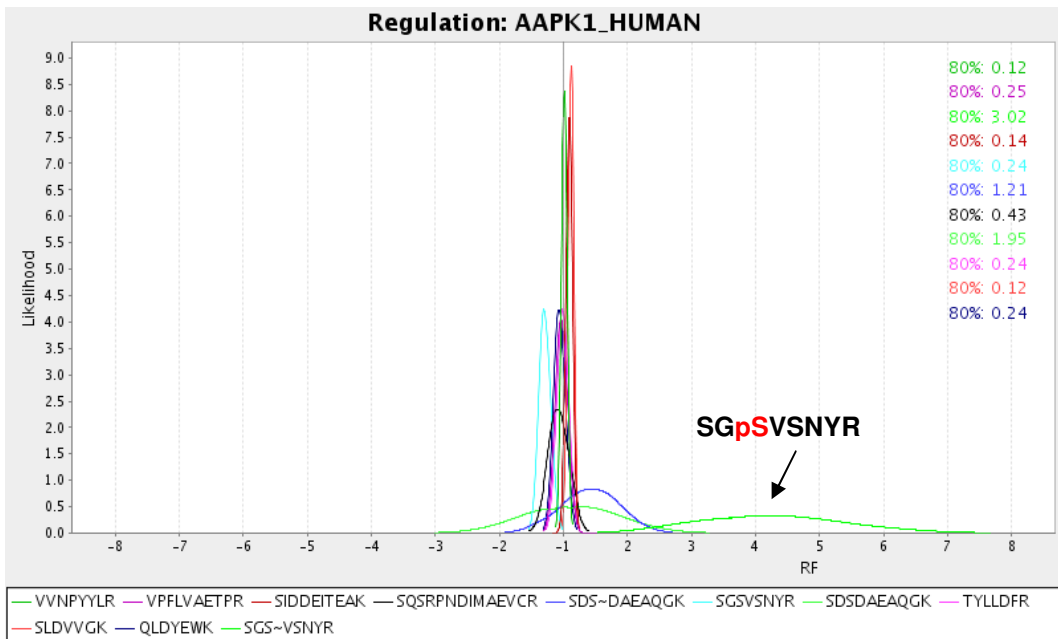

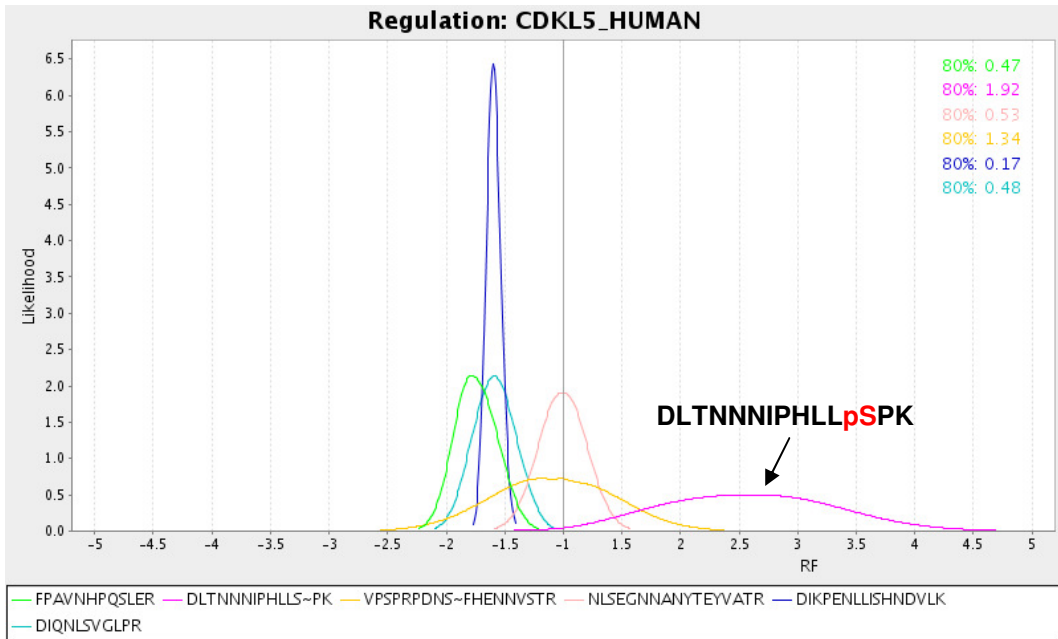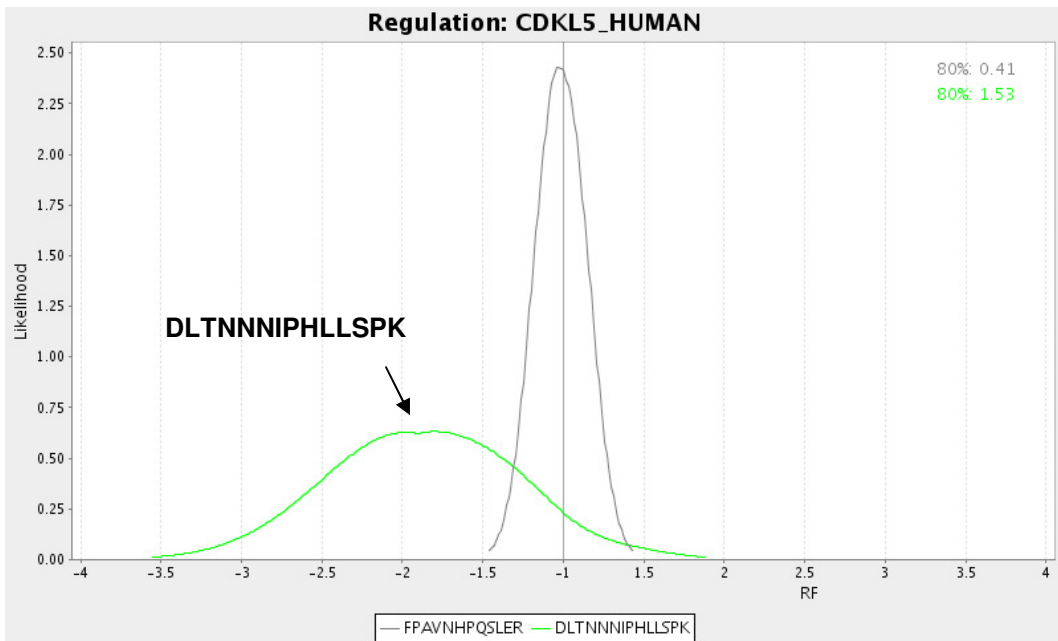

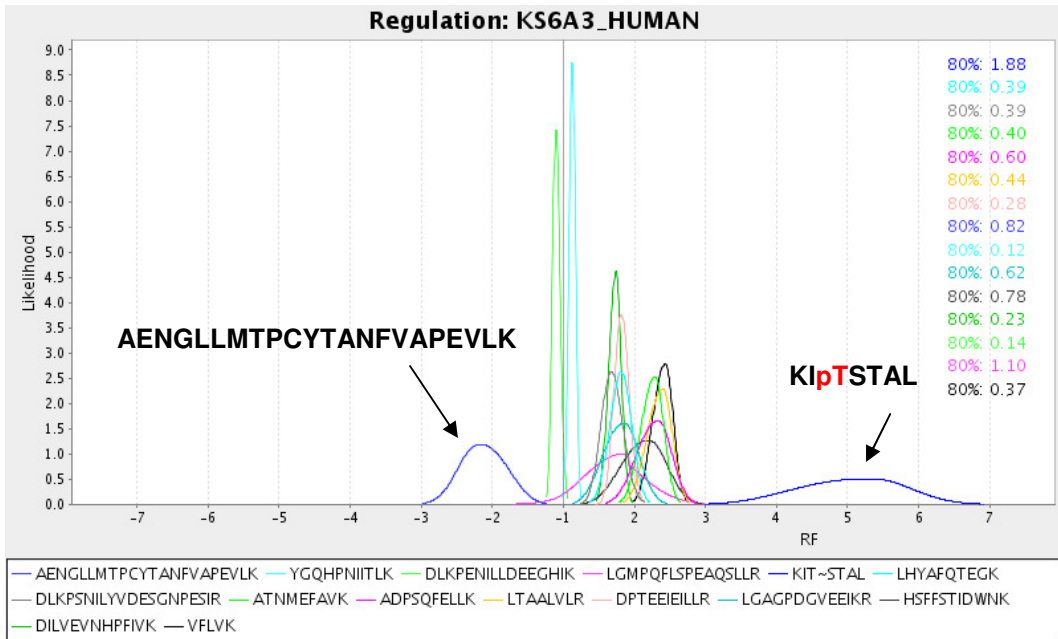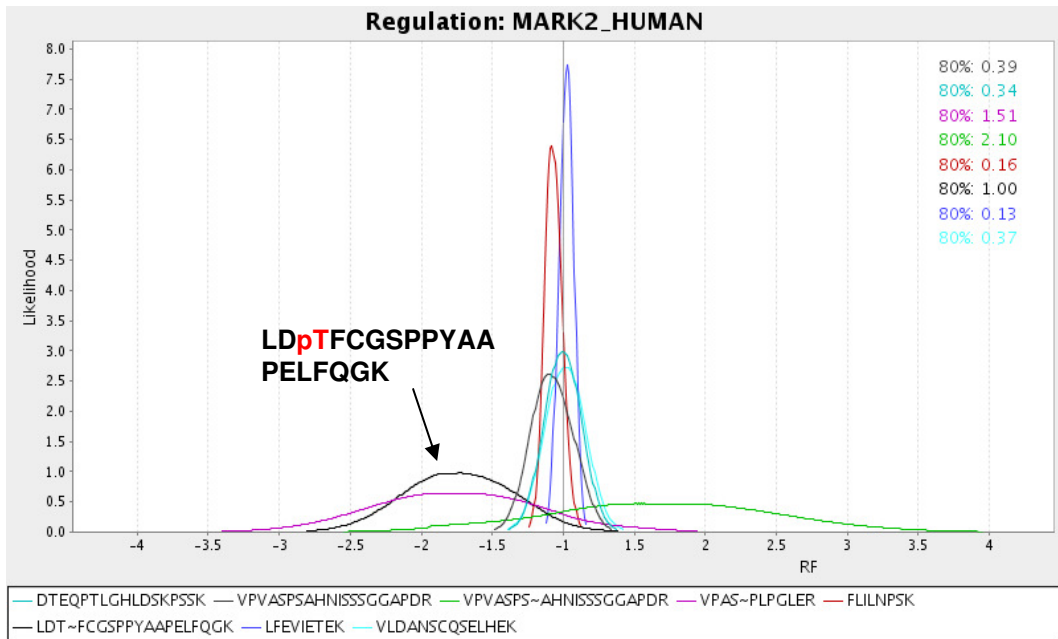

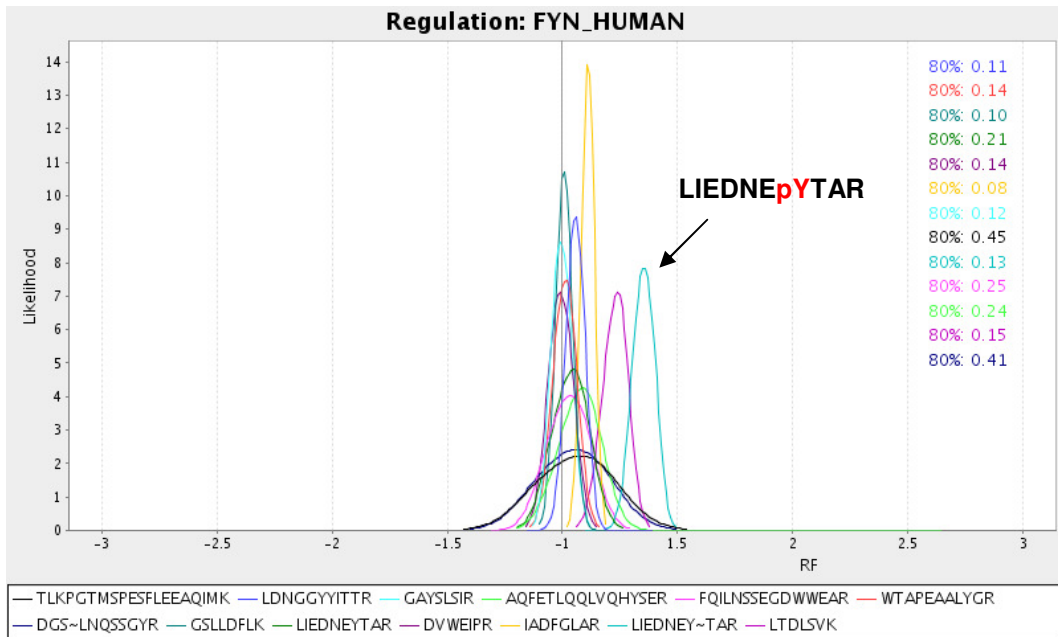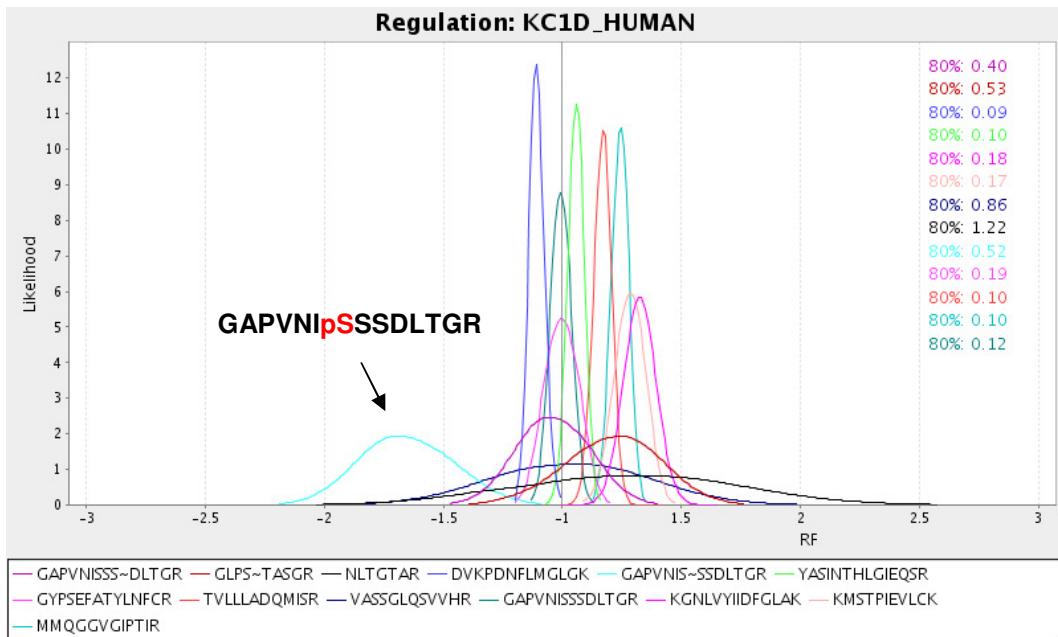

C. Fragmentation spectra and mass tables of phosphopeptides from protein kinases according to supplementary data S1/S2.

AAK1\_HUMAN: AGQTQPNGILPIQPALpTPR

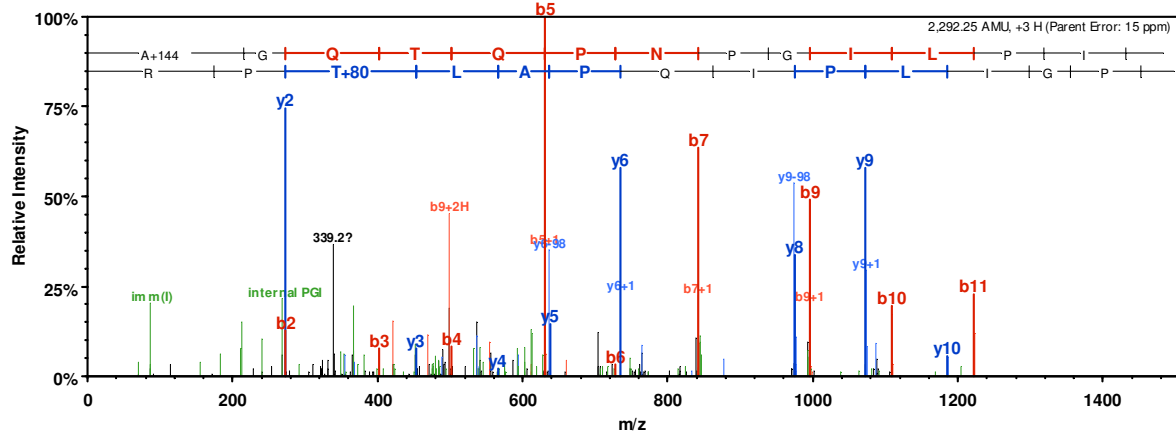

| B  | B Ions  | B+2H    | B-NH3   | B-H2O   | AA    | Y Ions  | Y+2H    | Y-NH3   | Y-H2O   | Y  |
|----|---------|---------|---------|---------|-------|---------|---------|---------|---------|----|
| 1  | 216.1   |         |         |         | A+144 | 2,293.2 | 1,147.1 | 2,276.2 | 2,275.2 | 20 |
| 2  | 273.2   |         |         |         | G     | 2,078.1 | 1,039.5 | 2,061.1 | 2,060.1 | 19 |
| 3  | 401.2   |         | 384.2   |         | Q     | 2,021.1 | 1,011.0 | 2,004.0 | 2,003.0 | 18 |
| 4  | 502.3   |         | 485.2   | 484.3   | T     | 1,893.0 | 947.0   | 1,876.0 | 1,875.0 | 17 |
| 5  | 630.3   |         | 613.3   | 612.3   | Q     | 1,792.0 | 896.5   | 1,774.9 | 1,773.9 | 16 |
| 6  | 727.4   | 364.2   | 710.4   | 709.4   | P     | 1,663.9 | 832.5   | 1,646.9 | 1,645.9 | 15 |
| 7  | 841.4   | 421.2   | 824.4   | 823.4   | N     | 1,566.8 | 783.9   | 1,549.8 | 1,548.8 | 14 |
| 8  | 938.5   | 469.7   | 921.5   | 920.5   | P     | 1,452.8 | 726.9   | 1,435.8 | 1,434.8 | 13 |
| 9  | 995.5   | 498.3   | 978.5   | 977.5   | G     | 1,355.7 | 678.4   | 1,338.7 | 1,337.7 | 12 |
| 10 | 1,108.6 | 554.8   | 1,091.6 | 1,090.6 | I     | 1,298.7 | 649.9   | 1,281.7 | 1,280.7 | 11 |
| 11 | 1,221.7 | 611.3   | 1,204.6 | 1,203.7 | L     | 1,185.6 | 593.3   | 1,168.6 | 1,167.6 | 10 |
| 12 | 1,318.7 | 659.9   | 1,301.7 | 1,300.7 | P     | 1,072.6 | 536.8   | 1,055.5 | 1,054.5 | 9  |
| 13 | 1,431.8 | 716.4   | 1,414.8 | 1,413.8 | I     | 975.5   | 488.3   | 958.5   | 957.5   | 8  |
| 14 | 1,559.9 | 780.4   | 1,542.8 | 1,541.9 | Q     | 862.4   | 431.7   | 845.4   | 844.4   | 7  |
| 15 | 1,656.9 | 829.0   | 1,639.9 | 1,638.9 | P     | 734.4   | 367.7   | 717.3   | 716.3   | 6  |
| 16 | 1,728.0 | 864.5   | 1,710.9 | 1,709.9 | A     | 637.3   |         | 620.3   | 619.3   | 5  |
| 17 | 1,841.0 | 921.0   | 1,824.0 | 1,823.0 | L     | 566.3   |         | 549.2   | 548.3   | 4  |
| 18 | 2,022.1 | 1,011.5 | 2,005.0 | 2,004.0 | T+80  | 453.2   |         | 436.2   | 435.2   | 3  |
| 19 | 2,119.1 | 1,060.1 | 2,102.1 | 2,101.1 | P     | 272.2   |         | 255.1   |         | 2  |
| 20 | 2,293.2 | 1,147.1 | 2,276.2 | 2,275.2 | R     | 175.1   |         | 158.1   |         | 1  |

# AAK1\_HUMAN: EQGGSLGpSGSSGGGGSTSLGSGYIGR

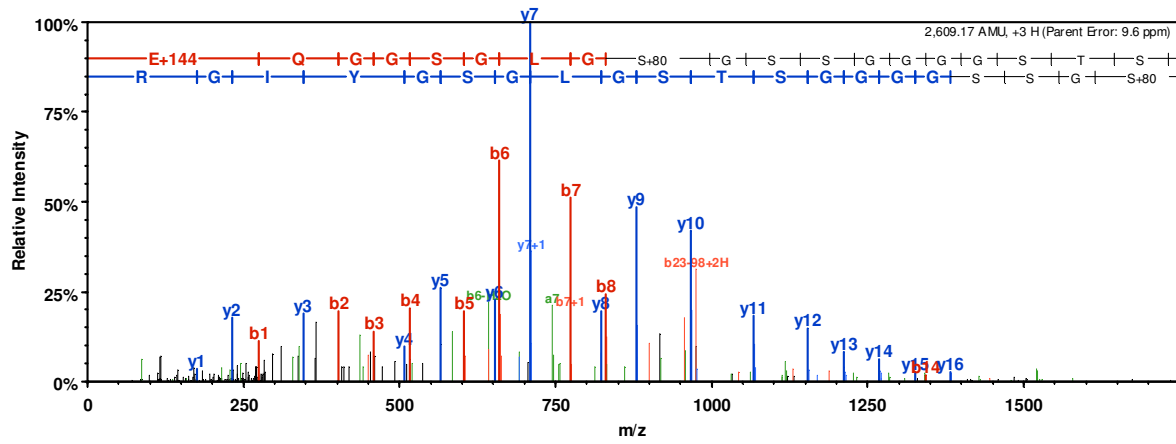

| B  | B Ions  | B+2H    | B-NH3   | B-H2O   | AA    | Y Ions  | Y+2H    | Y-NH3   | Y-H2O   | Y  |
|----|---------|---------|---------|---------|-------|---------|---------|---------|---------|----|
| 1  | 274.2   |         |         | 256.1   | E+144 | 2,610.2 | 1,305.6 | 2,593.1 | 2,592.1 | 28 |
| 2  | 402.2   |         | 385.2   | 384.2   | Q     | 2,337.0 | 1,169.0 | 2,320.0 | 2,319.0 | 27 |
| 3  | 459.2   |         | 442.2   | 441.2   | G     | 2,209.0 | 1,105.0 | 2,191.9 | 2,190.9 | 26 |
| 4  | 516.3   |         | 499.2   | 498.2   | G     | 2,151.9 | 1,076.5 | 2,134.9 | 2,133.9 | 25 |
| 5  | 603.3   |         | 586.3   | 585.3   | S     | 2,094.9 | 1,048.0 | 2,077.9 | 2,076.9 | 24 |
| 6  | 660.3   | 330.7   | 643.3   | 642.3   | G     | 2,007.9 | 1,004.4 | 1,990.9 | 1,989.9 | 23 |
| 7  | 773.4   | 387.2   | 756.4   | 755.4   | L     | 1,950.9 | 975.9   | 1,933.8 | 1,932.8 | 22 |
| 8  | 830.4   | 415.7   | 813.4   | 812.4   | G     | 1,837.8 | 919.4   | 1,820.7 | 1,819.8 | 21 |
| 9  | 997.4   | 499.2   | 980.4   | 979.4   | S+80  | 1,780.8 | 890.9   | 1,763.7 | 1,762.7 | 20 |
| 10 | 1,054.4 | 527.7   | 1,037.4 | 1,036.4 | G     | 1,613.8 | 807.4   | 1,596.7 | 1,595.7 | 19 |
| 11 | 1,141.5 | 571.2   | 1,124.4 | 1,123.5 | S     | 1,556.7 | 778.9   | 1,539.7 | 1,538.7 | 18 |
| 12 | 1,228.5 | 614.8   | 1,211.5 | 1,210.5 | S     | 1,469.7 | 735.4   | 1,452.7 | 1,451.7 | 17 |
| 13 | 1,285.5 | 643.3   | 1,268.5 | 1,267.5 | G     | 1,382.7 | 691.8   | 1,365.6 | 1,364.7 | 16 |
| 14 | 1,342.5 | 671.8   | 1,325.5 | 1,324.5 | G     | 1,325.6 | 663.3   | 1,308.6 | 1,307.6 | 15 |
| 15 | 1,399.6 | 700.3   | 1,382.5 | 1,381.6 | G     | 1,268.6 | 634.8   | 1,251.6 | 1,250.6 | 14 |
| 16 | 1,456.6 | 728.8   | 1,439.6 | 1,438.6 | G     | 1,211.6 | 606.3   | 1,194.6 | 1,193.6 | 13 |
| 17 | 1,543.6 | 772.3   | 1,526.6 | 1,525.6 | S     | 1,154.6 | 577.8   | 1,137.6 | 1,136.6 | 12 |
| 18 | 1,644.7 | 822.8   | 1,627.6 | 1,626.7 | T     | 1,067.5 | 534.3   | 1,050.5 | 1,049.5 | 11 |
| 19 | 1,731.7 | 866.4   | 1,714.7 | 1,713.7 | S     | 966.5   | 483.8   | 949.5   | 948.5   | 10 |
| 20 | 1,788.7 | 894.9   | 1,771.7 | 1,770.7 | G     | 879.5   | 440.2   | 862.4   | 861.5   | 9  |
| 21 | 1,901.8 | 951.4   | 1,884.8 | 1,883.8 | L     | 822.4   | 411.7   | 805.4   | 804.4   | 8  |
| 22 | 1,958.8 | 979.9   | 1,941.8 | 1,940.8 | G     | 709.4   | 355.2   | 692.3   | 691.4   | 7  |
| 23 | 2,045.9 | 1,023.4 | 2,028.8 | 2,027.8 | S     | 652.3   | 326.7   | 635.3   | 634.3   | 6  |
| 24 | 2,102.9 | 1,051.9 | 2,085.8 | 2,084.9 | G     | 565.3   |         | 548.3   |         | 5  |
| 25 | 2,265.9 | 1,133.5 | 2,248.9 | 2,247.9 | Y     | 508.3   |         | 491.3   |         | 4  |
| 26 | 2,379.0 | 1,190.0 | 2,362.0 | 2,361.0 | I     | 345.2   |         | 328.2   |         | 3  |
| 27 | 2,436.0 | 1,218.5 | 2,419.0 | 2,418.0 | G     | 232.1   |         | 215.1   |         | 2  |
| 28 | 2,610.2 | 1,305.6 | 2,593.1 | 2,592.1 | R     | 175.1   |         | 158.1   |         | 1  |

# AAK1\_HUMAN: ILpSDVTHTSAVFGVPASK

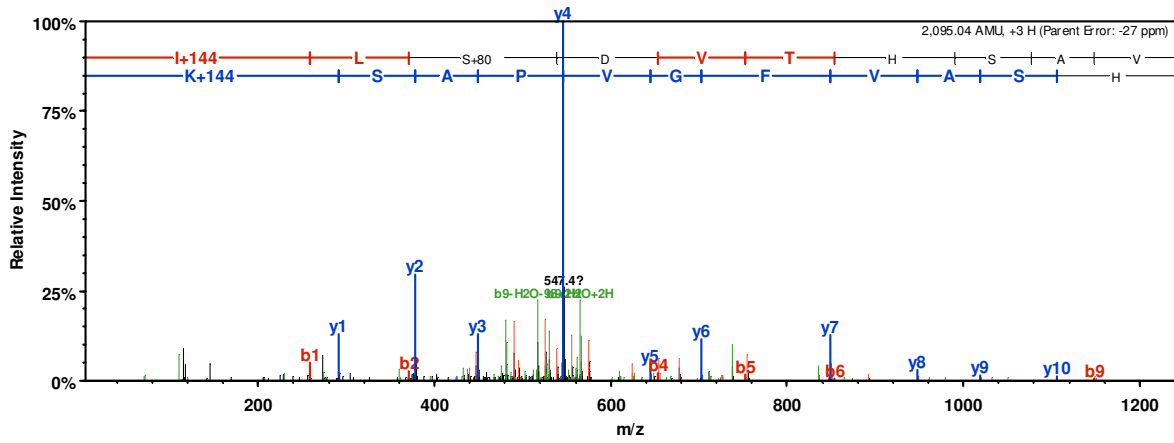

| B  | B Ions  | B+2H    | B-NH3   | B-H2O   | AA    | Y Ions  | Y+2H    | Y-NH3   | Y-H2O   | Y  |
|----|---------|---------|---------|---------|-------|---------|---------|---------|---------|----|
| 1  | 258.2   |         |         |         | I+144 | 2,096.1 | 1,048.6 | 2,079.1 | 2,078.1 | 17 |
| 2  | 371.3   |         |         |         | L     | 1,838.9 | 920.0   | 1,821.9 | 1,820.9 | 16 |
| 3  | 538.3   |         |         | 520.3   | S+80  | 1,725.8 | 863.4   | 1,708.8 | 1,707.8 | 15 |
| 4  | 653.3   |         |         | 635.3   | D     | 1,558.8 | 779.9   | 1,541.8 | 1,540.8 | 14 |
| 5  | 752.4   |         |         | 734.4   | V     | 1,443.8 | 722.4   | 1,426.8 | 1,425.8 | 13 |
| 6  | 853.4   | 427.2   |         | 835.4   | T     | 1,344.7 | 672.9   | 1,327.7 | 1,326.7 | 12 |
| 7  | 990.5   | 495.7   |         | 972.5   | H     | 1,243.7 | 622.3   | 1,226.7 | 1,225.7 | 11 |
| 8  | 1,077.5 | 539.3   |         | 1,059.5 | S     | 1,106.6 | 553.8   | 1,089.6 | 1,088.6 | 10 |
| 9  | 1,148.5 | 574.8   |         | 1,130.5 | A     | 1,019.6 | 510.3   | 1,002.6 | 1,001.6 | 9  |
| 10 | 1,247.6 | 624.3   |         | 1,229.6 | V     | 948.6   | 474.8   | 931.5   | 930.6   | 8  |
| 11 | 1,394.7 | 697.8   |         | 1,376.7 | F     | 849.5   | 425.3   | 832.5   | 831.5   | 7  |
| 12 | 1,451.7 | 726.4   |         | 1,433.7 | G     | 702.4   | 351.7   | 685.4   | 684.4   | 6  |
| 13 | 1,550.8 | 775.9   |         | 1,532.8 | V     | 645.4   |         | 628.4   | 627.4   | 5  |
| 14 | 1,647.8 | 824.4   |         | 1,629.8 | P     | 546.3   |         | 529.3   | 528.3   | 4  |
| 15 | 1,718.9 | 859.9   |         | 1,700.9 | A     | 449.3   |         | 432.3   | 431.3   | 3  |
| 16 | 1,805.9 | 903.5   |         | 1,787.9 | S     | 378.2   |         | 361.2   | 360.2   | 2  |
| 17 | 2,096.1 | 1,048.6 | 2,079.1 | 2,078.1 | K+144 | 291.2   |         | 274.2   |         | 1  |

# AAK1\_HUMAN: ILpSDVpTHSAVFGVPASK

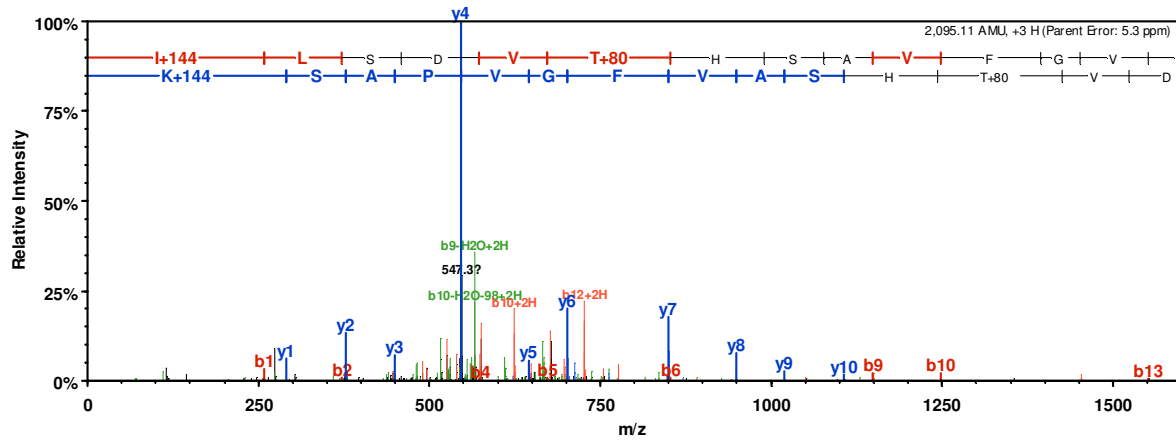

| B  | B Ions  | B+2H    | B-NH3   | B-H2O   | AA    | Y Ions  | Y+2H    | Y-NH3   | Y-H2O   | Y  |
|----|---------|---------|---------|---------|-------|---------|---------|---------|---------|----|
| 1  | 258.2   |         |         |         | I+144 | 2,096.1 | 1,048.6 | 2,079.1 | 2,078.1 | 17 |
| 2  | 371.3   |         |         |         | L     | 1,838.9 | 920.0   | 1,821.9 | 1,820.9 | 16 |
| 3  | 458.3   |         |         | 440.3   | S     | 1,725.8 | 863.4   | 1,708.8 | 1,707.8 | 15 |
| 4  | 573.3   |         |         | 555.3   | D     | 1,638.8 | 819.9   | 1,621.8 | 1,620.8 | 14 |
| 5  | 672.4   |         |         | 654.4   | V     | 1,523.8 | 762.4   | 1,506.7 | 1,505.8 | 13 |
| 6  | 853.4   | 427.2   |         | 835.4   | T+80  | 1,424.7 | 712.9   | 1,407.7 | 1,406.7 | 12 |
| 7  | 990.5   | 495.7   |         | 972.5   | H     | 1,243.7 | 622.3   | 1,226.7 | 1,225.7 | 11 |
| 8  | 1,077.5 | 539.3   |         | 1,059.5 | S     | 1,106.6 | 553.8   | 1,089.6 | 1,088.6 | 10 |
| 9  | 1,148.5 | 574.8   |         | 1,130.5 | A     | 1,019.6 | 510.3   | 1,002.6 | 1,001.6 | 9  |
| 10 | 1,247.6 | 624.3   |         | 1,229.6 | V     | 948.6   | 474.8   | 931.5   | 930.6   | 8  |
| 11 | 1,394.7 | 697.8   |         | 1,376.7 | F     | 849.5   | 425.3   | 832.5   | 831.5   | 7  |
| 12 | 1,451.7 | 726.4   |         | 1,433.7 | G     | 702.4   | 351.7   | 685.4   | 684.4   | 6  |
| 13 | 1,550.8 | 775.9   |         | 1,532.8 | V     | 645.4   |         | 628.4   | 627.4   | 5  |
| 14 | 1,647.8 | 824.4   |         | 1,629.8 | P     | 546.3   |         | 529.3   | 528.3   | 4  |
| 15 | 1,718.9 | 859.9   |         | 1,700.9 | A     | 449.3   |         | 432.3   | 431.3   | 3  |
| 16 | 1,805.9 | 903.5   |         | 1,787.9 | S     | 378.2   |         | 361.2   | 360.2   | 2  |
| 17 | 2,096.1 | 1,048.6 | 2,079.1 | 2,078.1 | K+144 | 291.2   |         | 274.2   |         | 1  |



# AAK1\_HUMAN: SApTTTPSGpSPR

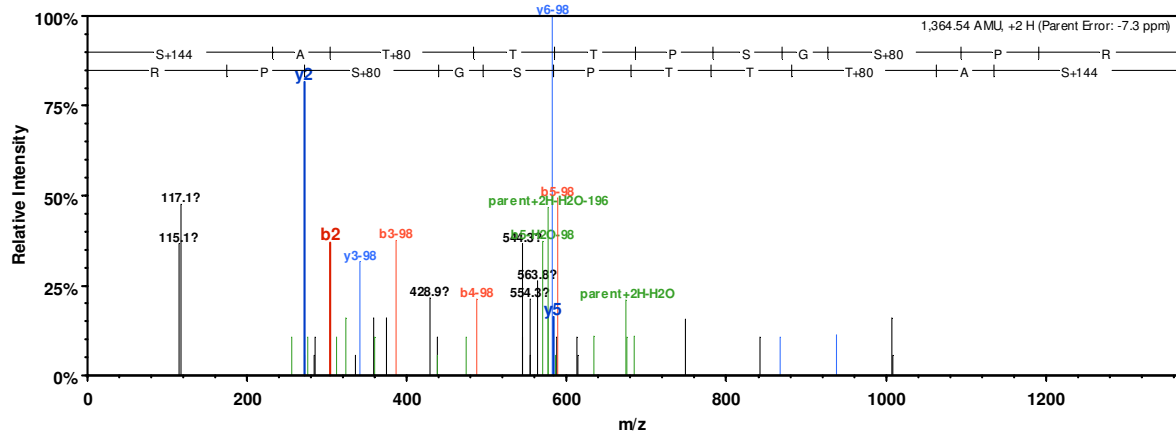

| B  | B Ions  | B+2H  | B-NH3   | B-H2O   | AA    | Y Ions  | Y+2H  | Y-NH3   | Y-H2O   | Y  |
|----|---------|-------|---------|---------|-------|---------|-------|---------|---------|----|
| 1  | 232.1   |       |         | 214.1   | S+144 | 1,365.6 | 683.3 | 1,348.5 | 1,347.5 | 11 |
| 2  | 303.2   |       |         | 285.2   | A     | 1,134.4 | 567.7 | 1,117.4 | 1,116.4 | 10 |
| 3  | 484.2   |       |         | 466.2   | T+80  | 1,063.4 | 532.2 | 1,046.4 | 1,045.4 | 9  |
| 4  | 585.2   |       |         | 567.2   | T     | 882.4   | 441.7 | 865.3   | 864.4   | 8  |
| 5  | 686.3   |       |         | 668.3   | T     | 781.3   | 391.2 | 764.3   | 763.3   | 7  |
| 6  | 783.3   | 392.2 |         | 765.3   | P     | 680.3   | 340.6 | 663.3   | 662.3   | 6  |
| 7  | 870.4   | 435.7 |         | 852.4   | S     | 583.2   |       | 566.2   | 565.2   | 5  |
| 8  | 927.4   | 464.2 |         | 909.4   | G     | 496.2   |       | 479.2   | 478.2   | 4  |
| 9  | 1,094.4 | 547.7 |         | 1,076.4 | S+80  | 439.2   |       | 422.1   | 421.2   | 3  |
| 10 | 1,191.4 | 596.2 |         | 1,173.4 | P     | 272.2   |       | 255.1   |         | 2  |
| 11 | 1,365.6 | 683.3 | 1,348.5 | 1,347.5 | R     | 175.1   |       | 158.1   |         | 1  |

# AAK1\_HUMAN: SATTpTPSGSPR

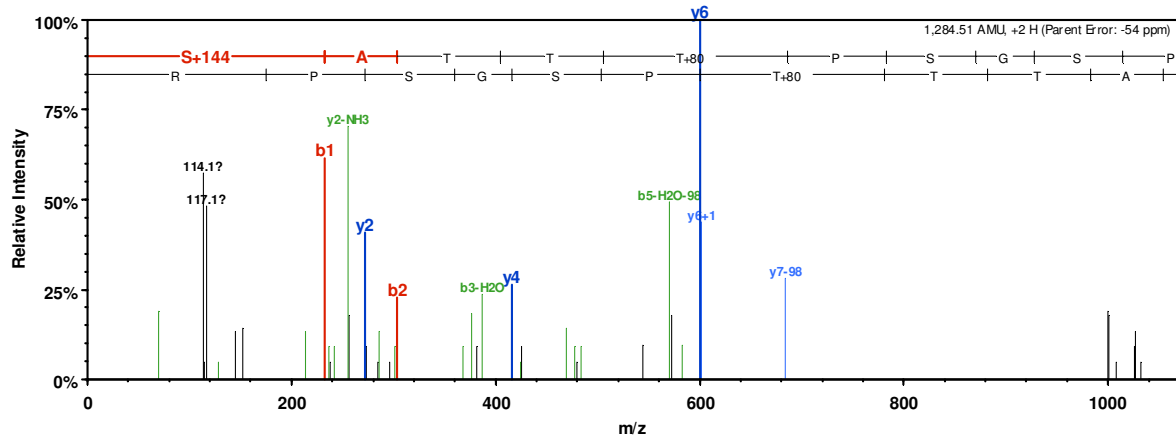

| B  | B Ions  | B+2H  | B-NH3   | B-H2O   | AA    | Y Ions  | Y+2H  | Y-NH3   | Y-H2O   | Y  |
|----|---------|-------|---------|---------|-------|---------|-------|---------|---------|----|
| 1  | 232.1   |       |         | 214.1   | S+144 | 1,285.6 | 643.3 | 1,268.6 | 1,267.6 | 11 |
| 2  | 303.2   |       |         | 285.2   | A     | 1,054.5 | 527.7 | 1,037.4 | 1,036.4 | 10 |
| 3  | 404.2   |       |         | 386.2   | T     | 983.4   | 492.2 | 966.4   | 965.4   | 9  |
| 4  | 505.3   |       |         | 487.3   | T     | 882.4   | 441.7 | 865.3   | 864.4   | 8  |
| 5  | 686.3   |       |         | 668.3   | T+80  | 781.3   | 391.2 | 764.3   | 763.3   | 7  |
| 6  | 783.3   | 392.2 |         | 765.3   | P     | 600.3   | 300.7 | 583.3   | 582.3   | 6  |
| 7  | 870.4   | 435.7 |         | 852.4   | S     | 503.3   |       | 486.2   | 485.2   | 5  |
| 8  | 927.4   | 464.2 |         | 909.4   | G     | 416.2   |       | 399.2   | 398.2   | 4  |
| 9  | 1,014.4 | 507.7 |         | 996.4   | S     | 359.2   |       | 342.2   | 341.2   | 3  |
| 10 | 1,111.5 | 556.2 |         | 1,093.5 | P     | 272.2   |       | 255.1   |         | 2  |
| 11 | 1,285.6 | 643.3 | 1,268.6 | 1,267.6 | R     | 175.1   |       | 158.1   |         | 1  |

# AAK1\_HUMAN: VGpSLTPPpSSPK

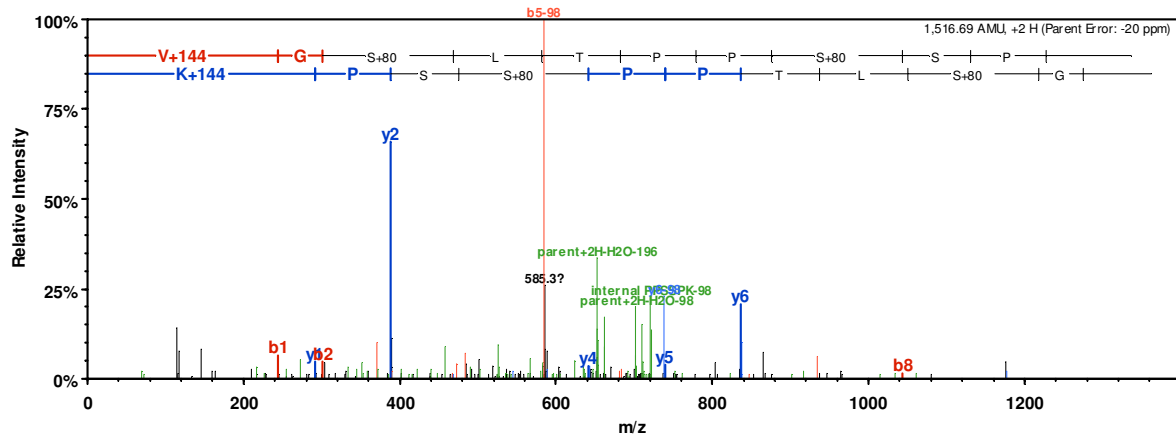

| B  | B Ions  | B+2H  | B-NH3   | B-H2O   | AA    | Y Ions  | Y+2H  | Y-NH3   | Y-H2O   | Y  |
|----|---------|-------|---------|---------|-------|---------|-------|---------|---------|----|
| 1  | 244.2   |       |         |         | V+144 | 1,517.7 | 759.4 | 1,500.7 | 1,499.7 | 11 |
| 2  | 301.2   |       |         |         | G     | 1,274.6 | 637.8 | 1,257.5 | 1,256.5 | 10 |
| 3  | 468.2   |       |         | 450.2   | S+80  | 1,217.5 | 609.3 | 1,200.5 | 1,199.5 | 9  |
| 4  | 581.3   |       |         | 563.3   | L     | 1,050.5 | 525.8 | 1,033.5 | 1,032.5 | 8  |
| 5  | 682.3   |       |         | 664.3   | T     | 937.5   | 469.2 | 920.4   | 919.4   | 7  |
| 6  | 779.4   | 390.2 |         | 761.4   | P     | 836.4   | 418.7 | 819.4   | 818.4   | 6  |
| 7  | 876.4   | 438.7 |         | 858.4   | P     | 739.4   |       | 722.3   | 721.3   | 5  |
| 8  | 1,043.4 | 522.2 |         | 1,025.4 | S+80  | 642.3   |       | 625.3   | 624.3   | 4  |
| 9  | 1,130.5 | 565.7 |         | 1,112.5 | S     | 475.3   |       | 458.3   | 457.3   | 3  |
| 10 | 1,227.5 | 614.3 |         | 1,209.5 | P     | 388.3   |       | 371.2   |         | 2  |
| 11 | 1,517.7 | 759.4 | 1,500.7 | 1,499.7 | K+144 | 291.2   |       | 274.2   |         | 1  |

# AAK1\_HUMAN: VGpSLTPPSpSPK

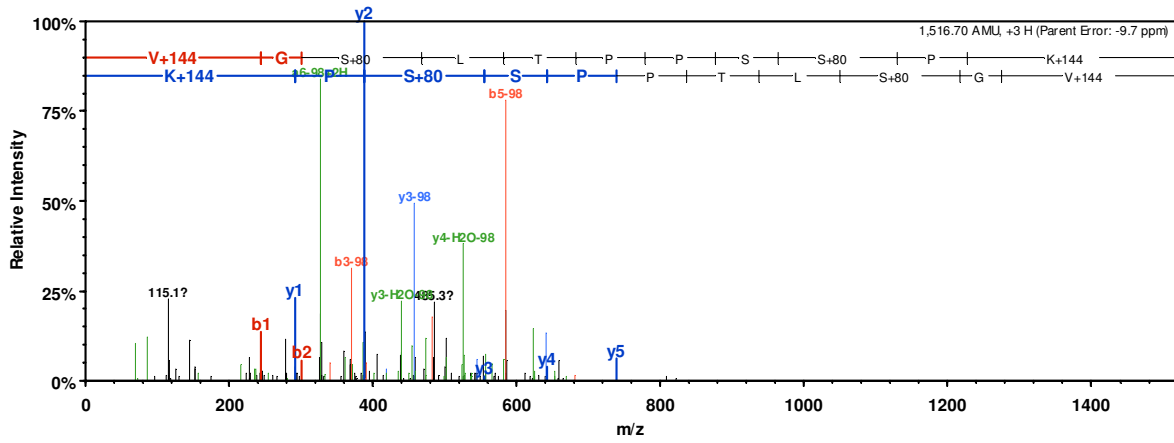

| B  | B Ions  | B+2H  | B-NH3   | B-H2O   | AA    | Y Ions  | Y+2H  | Y-NH3   | Y-H2O   | Y  |
|----|---------|-------|---------|---------|-------|---------|-------|---------|---------|----|
| 1  | 244.2   |       |         |         | V+144 | 1,517.7 | 759.4 | 1,500.7 | 1,499.7 | 11 |
| 2  | 301.2   |       |         |         | G     | 1,274.6 | 637.8 | 1,257.5 | 1,256.5 | 10 |
| 3  | 468.2   |       |         | 450.2   | S+80  | 1,217.5 | 609.3 | 1,200.5 | 1,199.5 | 9  |
| 4  | 581.3   |       |         | 563.3   | L     | 1,050.5 | 525.8 | 1,033.5 | 1,032.5 | 8  |
| 5  | 682.3   |       |         | 664.3   | T     | 937.5   | 469.2 | 920.4   | 919.4   | 7  |
| 6  | 779.4   | 390.2 |         | 761.4   | P     | 836.4   | 418.7 | 819.4   | 818.4   | 6  |
| 7  | 876.4   | 438.7 |         | 858.4   | P     | 739.4   |       | 722.3   | 721.3   | 5  |
| 8  | 963.5   | 482.2 |         | 945.5   | S     | 642.3   |       | 625.3   | 624.3   | 4  |
| 9  | 1,130.5 | 565.7 |         | 1,112.5 | S+80  | 555.3   |       | 538.2   | 537.3   | 3  |
| 10 | 1,227.5 | 614.3 |         | 1,209.5 | P     | 388.3   |       | 371.2   |         | 2  |
| 11 | 1,517.7 | 759.4 | 1,500.7 | 1,499.7 | K+144 | 291.2   |       | 274.2   |         | 1  |

# AAK1\_HUMAN: VGSLpTPPSpSPK

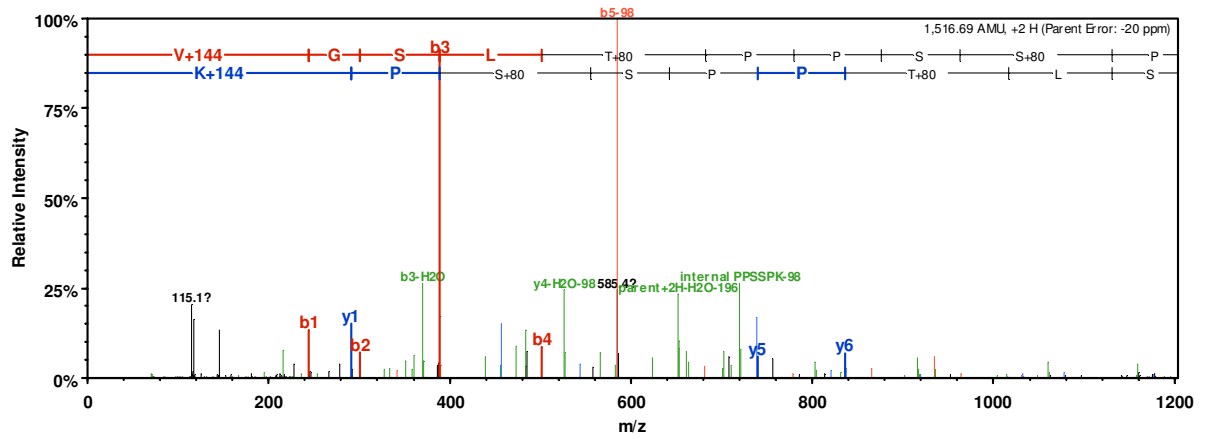

| B  | B Ions  | B+2H  | B-NH3   | B-H2O   | AA    | Y Ions  | Y+2H  | Y-NH3   | Y-H2O   | Y  |
|----|---------|-------|---------|---------|-------|---------|-------|---------|---------|----|
| 1  | 244.2   |       |         |         | V+144 | 1,517.7 | 759.4 | 1,500.7 | 1,499.7 | 11 |
| 2  | 301.2   |       |         |         | G     | 1,274.6 | 637.8 | 1,257.5 | 1,256.5 | 10 |
| 3  | 388.2   |       |         | 370.2   | S     | 1,217.5 | 609.3 | 1,200.5 | 1,199.5 | 9  |
| 4  | 501.3   |       |         | 483.3   | L     | 1,130.5 | 565.8 | 1,113.5 | 1,112.5 | 8  |
| 5  | 682.3   |       |         | 664.3   | T+80  | 1,017.4 | 509.2 | 1,000.4 | 999.4   | 7  |
| 6  | 779.4   | 390.2 |         | 761.4   | P     | 836.4   | 418.7 | 819.4   | 818.4   | 6  |
| 7  | 876.4   | 438.7 |         | 858.4   | P     | 739.4   |       | 722.3   | 721.3   | 5  |
| 8  | 963.5   | 482.2 |         | 945.5   | S     | 642.3   |       | 625.3   | 624.3   | 4  |
| 9  | 1,130.5 | 565.7 |         | 1,112.5 | S+80  | 555.3   |       | 538.2   | 537.3   | 3  |
| 10 | 1,227.5 | 614.3 |         | 1,209.5 | P     | 388.3   |       | 371.2   |         | 2  |
| 11 | 1,517.7 | 759.4 | 1,500.7 | 1,499.7 | K+144 | 291.2   |       | 274.2   |         | 1  |

# AAK1\_HUMAN: VGSLTPPpSpSPK

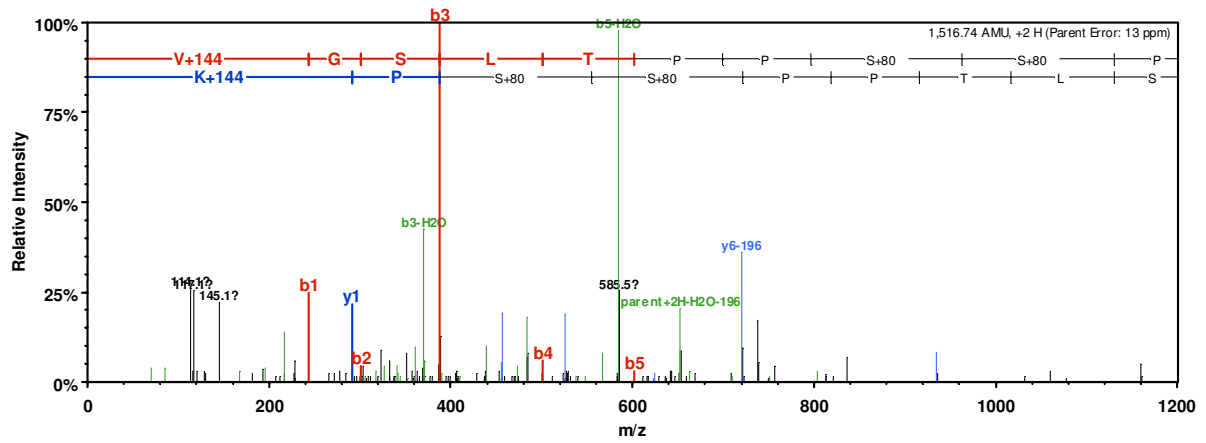

| B  | B Ions  | B+2H  | B-NH3   | B-H2O   | AA    | Y Ions  | Y+2H  | Y-NH3   | Y-H2O   | Y  |
|----|---------|-------|---------|---------|-------|---------|-------|---------|---------|----|
| 1  | 244.2   |       |         |         | V+144 | 1,517.7 | 759.4 | 1,500.7 | 1,499.7 | 11 |
| 2  | 301.2   |       |         |         | G     | 1,274.6 | 637.8 | 1,257.5 | 1,256.5 | 10 |
| 3  | 388.2   |       |         | 370.2   | S     | 1,217.5 | 609.3 | 1,200.5 | 1,199.5 | 9  |
| 4  | 501.3   |       |         | 483.3   | L     | 1,130.5 | 565.8 | 1,113.5 | 1,112.5 | 8  |
| 5  | 602.4   |       |         | 584.4   | T     | 1,017.4 | 509.2 | 1,000.4 | 999.4   | 7  |
| 6  | 699.4   | 350.2 |         | 681.4   | P     | 916.4   | 458.7 | 899.3   | 898.4   | 6  |
| 7  | 796.5   | 398.7 |         | 778.5   | P     | 819.3   |       | 802.3   | 801.3   | 5  |
| 8  | 963.5   | 482.2 |         | 945.5   | S+80  | 722.3   |       | 705.2   | 704.3   | 4  |
| 9  | 1,130.5 | 565.7 |         | 1,112.5 | S+80  | 555.3   |       | 538.2   | 537.3   | 3  |
| 10 | 1,227.5 | 614.3 |         | 1,209.5 | P     | 388.3   |       | 371.2   |         | 2  |
| 11 | 1,517.7 | 759.4 | 1,500.7 | 1,499.7 | K+144 | 291.2   |       | 274.2   |         | 1  |

# AAK1\_HUMAN: VQ<sup>p</sup>TTPPPAVQGQK

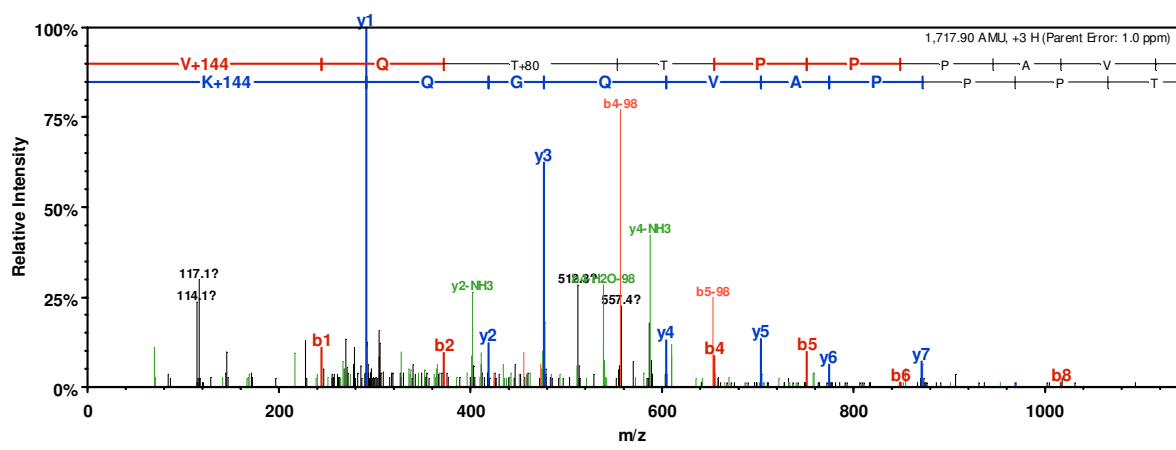

| B  | B Ions  | B+2H  | B-NH3   | B-H2O   | AA    | Y Ions  | Y+2H  | Y-NH3   | Y-H2O   | Y  |
|----|---------|-------|---------|---------|-------|---------|-------|---------|---------|----|
| 1  | 244.2   |       |         |         | V+144 | 1,718.9 | 860.0 | 1,701.9 | 1,700.9 | 13 |
| 2  | 372.2   |       | 355.2   |         | Q     | 1,475.7 | 738.4 | 1,458.7 | 1,457.7 | 12 |
| 3  | 553.3   |       | 536.2   | 535.2   | T+80  | 1,347.7 | 674.3 | 1,330.7 | 1,329.7 | 11 |
| 4  | 654.3   |       | 637.3   | 636.3   | T     | 1,166.7 | 583.8 | 1,149.6 | 1,148.7 | 10 |
| 5  | 751.4   |       | 734.3   | 733.3   | P     | 1,065.6 | 533.3 | 1,048.6 |         | 9  |
| 6  | 848.4   | 424.7 | 831.4   | 830.4   | P     | 968.6   | 484.8 | 951.5   |         | 8  |
| 7  | 945.5   | 473.2 | 928.4   | 927.4   | P     | 871.5   | 436.3 | 854.5   |         | 7  |
| 8  | 1,016.5 | 508.8 | 999.5   | 998.5   | A     | 774.5   | 387.7 | 757.4   |         | 6  |
| 9  | 1,115.6 | 558.3 | 1,098.5 | 1,097.6 | V     | 703.4   |       | 686.4   |         | 5  |
| 10 | 1,243.6 | 622.3 | 1,226.6 | 1,225.6 | Q     | 604.4   |       | 587.3   |         | 4  |
| 11 | 1,300.6 | 650.8 | 1,283.6 | 1,282.6 | G     | 476.3   |       | 459.3   |         | 3  |
| 12 | 1,428.7 | 714.9 | 1,411.7 | 1,410.7 | Q     | 419.3   |       | 402.2   |         | 2  |
| 13 | 1,718.9 | 860.0 | 1,701.9 | 1,700.9 | K+144 | 291.2   |       | 274.2   |         | 1  |

# AAK1\_HUMAN: VQTpTPPPAVQGQK

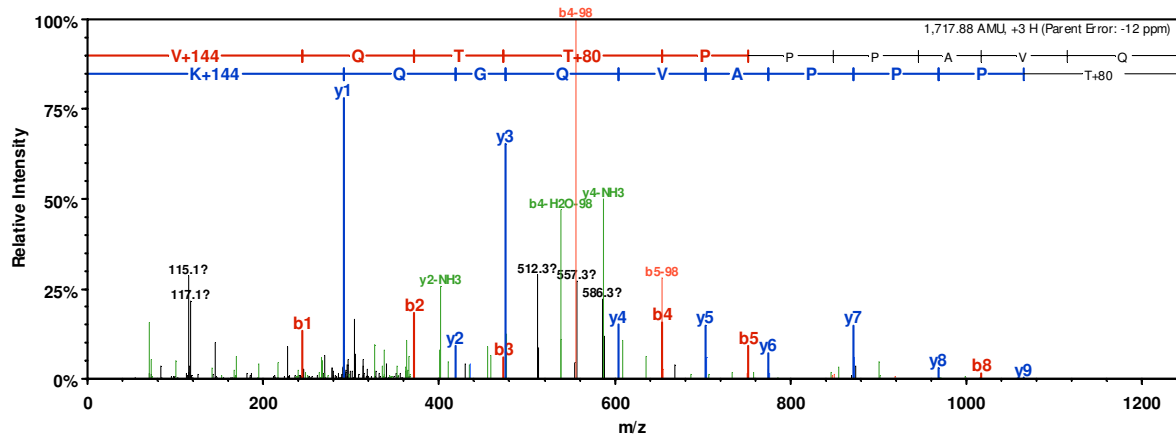

| B  | B Ions  | B+2H  | B-NH3   | B-H2O   | AA    | Y Ions  | Y+2H  | Y-NH3   | Y-H2O   | Y  |
|----|---------|-------|---------|---------|-------|---------|-------|---------|---------|----|
| 1  | 244.2   |       |         |         | V+144 | 1,718.9 | 860.0 | 1,701.9 | 1,700.9 | 13 |
| 2  | 372.2   |       | 355.2   |         | Q     | 1,475.7 | 738.4 | 1,458.7 | 1,457.7 | 12 |
| 3  | 473.3   |       | 456.3   | 455.3   | T     | 1,347.7 | 674.3 | 1,330.7 | 1,329.7 | 11 |
| 4  | 654.3   |       | 637.3   | 636.3   | T+80  | 1,246.6 | 623.8 | 1,229.6 | 1,228.6 | 10 |
| 5  | 751.4   |       | 734.3   | 733.3   | P     | 1,065.6 | 533.3 | 1,048.6 |         | 9  |
| 6  | 848.4   | 424.7 | 831.4   | 830.4   | P     | 968.6   | 484.8 | 951.5   |         | 8  |
| 7  | 945.5   | 473.2 | 928.4   | 927.4   | P     | 871.5   | 436.3 | 854.5   |         | 7  |
| 8  | 1,016.5 | 508.8 | 999.5   | 998.5   | A     | 774.5   | 387.7 | 757.4   |         | 6  |
| 9  | 1,115.6 | 558.3 | 1,098.5 | 1,097.6 | V     | 703.4   |       | 686.4   |         | 5  |
| 10 | 1,243.6 | 622.3 | 1,226.6 | 1,225.6 | Q     | 604.4   |       | 587.3   |         | 4  |
| 11 | 1,300.6 | 650.8 | 1,283.6 | 1,282.6 | G     | 476.3   |       | 459.3   |         | 3  |
| 12 | 1,428.7 | 714.9 | 1,411.7 | 1,410.7 | Q     | 419.3   |       | 402.2   |         | 2  |
| 13 | 1,718.9 | 860.0 | 1,701.9 | 1,700.9 | K+144 | 291.2   |       | 274.2   |         | 1  |



# AAPK1\_HUMAN: SDpSDAEAQGK

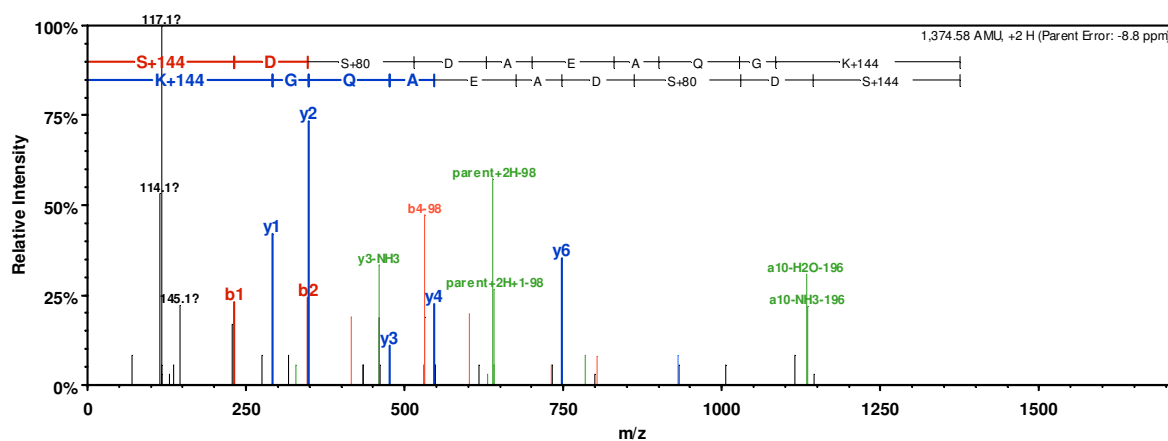

| B  | B Ions  | B+2H  | B-NH3   | B-H2O   | AA    | Y Ions  | Y+2H  | Y-NH3   | Y-H2O   | Y  |
|----|---------|-------|---------|---------|-------|---------|-------|---------|---------|----|
| 1  | 232.1   |       |         | 214.1   | S+144 | 1,375.6 | 688.3 | 1,358.6 | 1,357.6 | 10 |
| 2  | 347.2   |       |         | 329.2   | D     | 1,144.5 | 572.7 | 1,127.4 | 1,126.5 | 9  |
| 3  | 514.2   |       |         | 496.2   | S+80  | 1,029.4 | 515.2 | 1,012.4 | 1,011.4 | 8  |
| 4  | 629.2   |       |         | 611.2   | D     | 862.4   | 431.7 | 845.4   | 844.4   | 7  |
| 5  | 700.2   |       |         | 682.2   | A     | 747.4   | 374.2 | 730.4   | 729.4   | 6  |
| 6  | 829.3   | 415.1 |         | 811.3   | E     | 676.4   |       | 659.3   | 658.4   | 5  |
| 7  | 900.3   | 450.7 |         | 882.3   | A     | 547.3   |       | 530.3   |         | 4  |
| 8  | 1,028.4 | 514.7 | 1,011.3 | 1,010.4 | Q     | 476.3   |       | 459.3   |         | 3  |
| 9  | 1,085.4 | 543.2 | 1,068.4 | 1,067.4 | G     | 348.2   |       | 331.2   |         | 2  |
| 10 | 1,375.6 | 688.3 | 1,358.6 | 1,357.6 | K+144 | 291.2   |       | 274.2   |         | 1  |

# ABL2\_HUMAN: GAQASSGpSPALPR

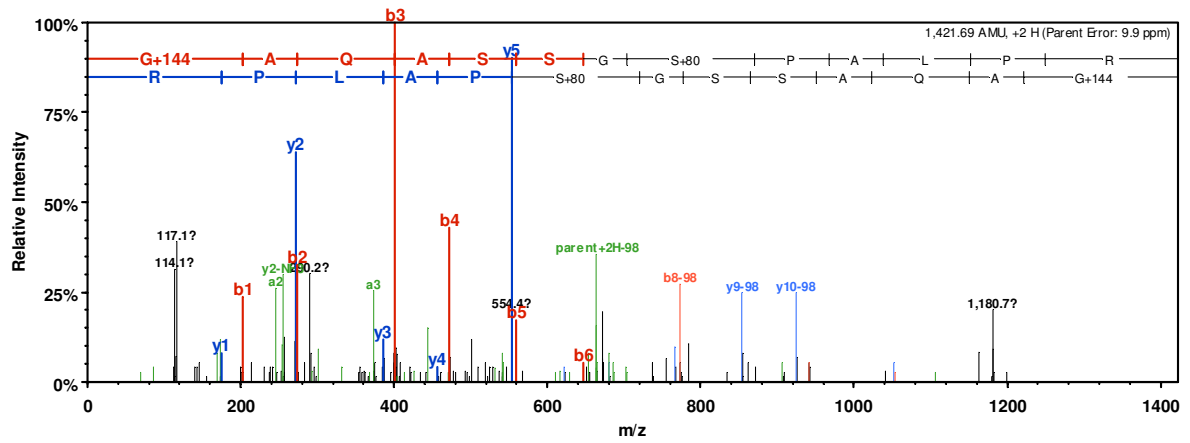

| B  | B Ions  | B+2H  | B-NH3   | B-H2O   | AA    | Y Ions  | Y+2H  | Y-NH3   | Y-H2O   | Y  |
|----|---------|-------|---------|---------|-------|---------|-------|---------|---------|----|
| 1  | 202.1   |       |         |         | G+144 | 1,422.7 | 711.8 | 1,405.7 | 1,404.7 | 13 |
| 2  | 273.2   |       |         |         | A     | 1,221.6 | 611.3 | 1,204.5 | 1,203.6 | 12 |
| 3  | 401.2   |       | 384.2   |         | Q     | 1,150.5 | 575.8 | 1,133.5 | 1,132.5 | 11 |
| 4  | 472.3   |       | 455.2   |         | A     | 1,022.5 | 511.7 | 1,005.4 | 1,004.5 | 10 |
| 5  | 559.3   |       | 542.3   | 541.3   | S     | 951.4   | 476.2 | 934.4   | 933.4   | 9  |
| 6  | 646.3   | 323.7 | 629.3   | 628.3   | S     | 864.4   | 432.7 | 847.4   | 846.4   | 8  |
| 7  | 703.3   | 352.2 | 686.3   | 685.3   | G     | 777.4   | 389.2 | 760.3   | 759.4   | 7  |
| 8  | 870.3   | 435.7 | 853.3   | 852.3   | S+80  | 720.3   | 360.7 | 703.3   | 702.3   | 6  |
| 9  | 967.4   | 484.2 | 950.4   | 949.4   | P     | 553.3   |       | 536.3   |         | 5  |
| 10 | 1,038.4 | 519.7 | 1,021.4 | 1,020.4 | A     | 456.3   |       | 439.3   |         | 4  |
| 11 | 1,151.5 | 576.3 | 1,134.5 | 1,133.5 | L     | 385.3   |       | 368.2   |         | 3  |
| 12 | 1,248.6 | 624.8 | 1,231.5 | 1,230.6 | P     | 272.2   |       | 255.1   |         | 2  |
| 13 | 1,422.7 | 711.8 | 1,405.7 | 1,404.7 | R     | 175.1   |       | 158.1   |         | 1  |

# AURKB\_HUMAN: ENpSYPWPYGR

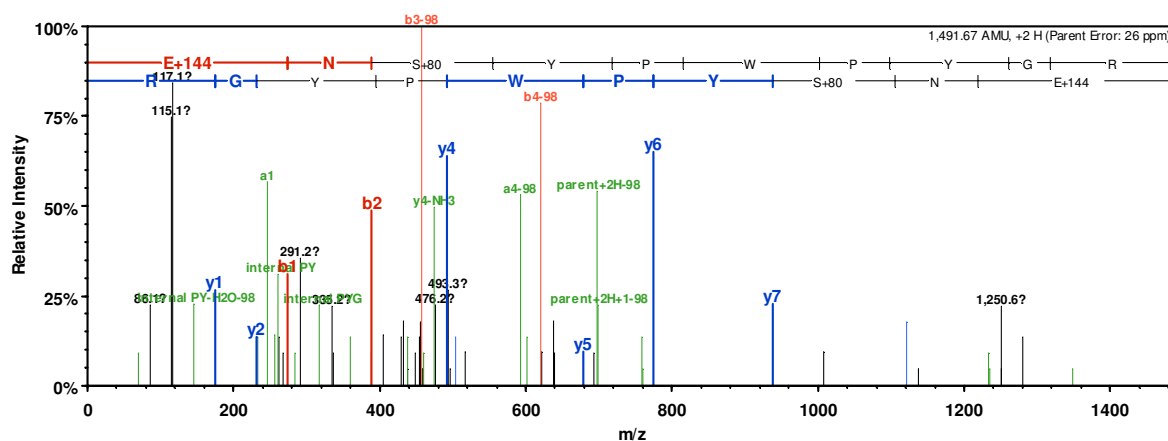

| B  | B Ions  | B+2H  | B-NH3   | B-H2O   | AA    | Y Ions  | Y+2H  | Y-NH3   | Y-H2O   | Y  |
|----|---------|-------|---------|---------|-------|---------|-------|---------|---------|----|
| 1  | 274.2   |       |         | 256.1   | E+144 | 1,492.6 | 746.8 | 1,475.6 | 1,474.6 | 10 |
| 2  | 388.2   |       | 371.2   | 370.2   | N     | 1,219.5 | 610.3 | 1,202.5 | 1,201.5 | 9  |
| 3  | 555.2   |       | 538.2   | 537.2   | S+80  | 1,105.5 | 553.2 | 1,088.4 | 1,087.4 | 8  |
| 4  | 718.3   |       | 701.2   | 700.2   | Y     | 938.5   | 469.7 | 921.4   |         | 7  |
| 5  | 815.3   |       | 798.3   | 797.3   | P     | 775.4   | 388.2 | 758.4   |         | 6  |
| 6  | 1,001.4 | 501.2 | 984.4   | 983.4   | W     | 678.3   |       | 661.3   |         | 5  |
| 7  | 1,098.4 | 549.7 | 1,081.4 | 1,080.4 | P     | 492.3   |       | 475.2   |         | 4  |
| 8  | 1,261.5 | 631.3 | 1,244.5 | 1,243.5 | Y     | 395.2   |       | 378.2   |         | 3  |
| 9  | 1,318.5 | 659.8 | 1,301.5 | 1,300.5 | G     | 232.1   |       | 215.1   |         | 2  |
| 10 | 1,492.6 | 746.8 | 1,475.6 | 1,474.6 | R     | 175.1   |       | 158.1   |         | 1  |

# BMP2K\_HUMAN: SEGGpSGGGAAGGGAGGAGAGAGCGSGGSSVGVR

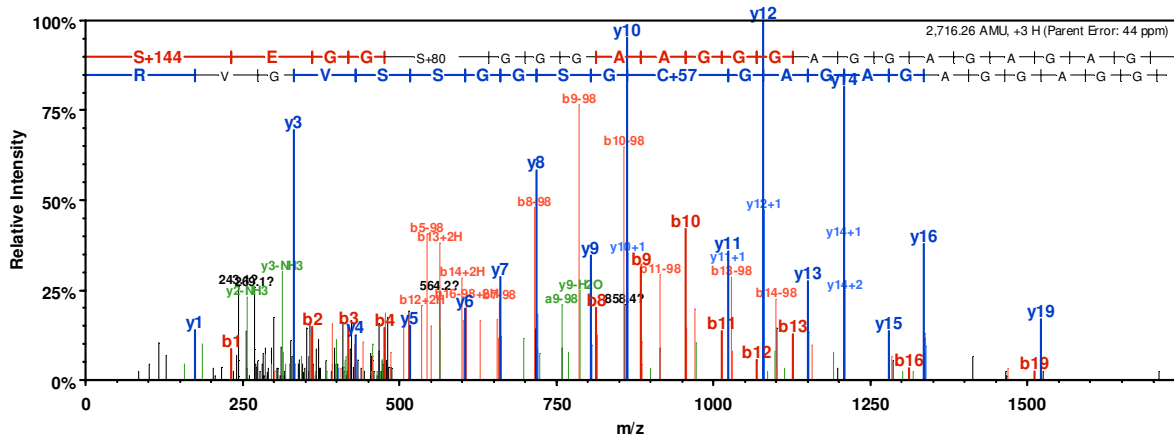

| B  | B Ions  | B+2H    | B-NH3   | B-H2O   | AA    | Y Ions  | Y+2H    | Y-NH3   | Y-H2O   | Y  |
|----|---------|---------|---------|---------|-------|---------|---------|---------|---------|----|
| 1  | 232.1   |         |         | 214.1   | S+144 | 2,717.1 | 1,359.1 | 2,700.1 | 2,699.1 | 33 |
| 2  | 361.2   |         |         | 343.2   | E     | 2,486.0 | 1,243.5 | 2,469.0 | 2,468.0 | 32 |
| 3  | 418.2   |         |         | 400.2   | G     | 2,357.0 | 1,179.0 | 2,339.9 | 2,339.0 | 31 |
| 4  | 475.2   |         |         | 457.2   | G     | 2,299.9 | 1,150.5 | 2,282.9 | 2,281.9 | 30 |
| 5  | 642.2   |         |         | 624.2   | S+80  | 2,242.9 | 1,122.0 | 2,225.9 | 2,224.9 | 29 |
| 6  | 699.2   | 350.1   |         | 681.2   | G     | 2,075.9 | 1,038.5 | 2,058.9 | 2,057.9 | 28 |
| 7  | 756.3   | 378.6   |         | 738.3   | G     | 2,018.9 | 1,010.0 | 2,001.9 | 2,000.9 | 27 |
| 8  | 813.3   | 407.1   |         | 795.3   | G     | 1,961.9 | 981.4   | 1,944.9 | 1,943.9 | 26 |
| 9  | 884.3   | 442.7   |         | 866.3   | A     | 1,904.9 | 952.9   | 1,887.8 | 1,886.9 | 25 |
| 10 | 955.4   | 478.2   |         | 937.4   | A     | 1,833.8 | 917.4   | 1,816.8 | 1,815.8 | 24 |
| 11 | 1,012.4 | 506.7   |         | 994.4   | G     | 1,762.8 | 881.9   | 1,745.8 | 1,744.8 | 23 |
| 12 | 1,069.4 | 535.2   |         | 1,051.4 | G     | 1,705.8 | 853.4   | 1,688.7 | 1,687.8 | 22 |
| 13 | 1,126.4 | 563.7   |         | 1,108.4 | G     | 1,648.7 | 824.9   | 1,631.7 | 1,630.7 | 21 |
| 14 | 1,197.5 | 599.2   |         | 1,179.5 | A     | 1,591.7 | 796.4   | 1,574.7 | 1,573.7 | 20 |
| 15 | 1,254.5 | 627.7   |         | 1,236.5 | G     | 1,520.7 | 760.8   | 1,503.7 | 1,502.7 | 19 |
| 16 | 1,311.5 | 656.3   |         | 1,293.5 | G     | 1,463.7 | 732.3   | 1,446.6 | 1,445.7 | 18 |
| 17 | 1,382.5 | 691.8   |         | 1,364.5 | A     | 1,406.6 | 703.8   | 1,389.6 | 1,388.6 | 17 |
| 18 | 1,439.6 | 720.3   |         | 1,421.6 | G     | 1,335.6 | 668.3   | 1,318.6 | 1,317.6 | 16 |
| 19 | 1,510.6 | 755.8   |         | 1,492.6 | A     | 1,278.6 | 639.8   | 1,261.6 | 1,260.6 | 15 |
| 20 | 1,567.6 | 784.3   |         | 1,549.6 | G     | 1,207.5 | 604.3   | 1,190.5 | 1,189.5 | 14 |
| 21 | 1,638.7 | 819.8   |         | 1,620.7 | A     | 1,150.5 | 575.8   | 1,133.5 | 1,132.5 | 13 |
| 22 | 1,695.7 | 848.3   |         | 1,677.7 | G     | 1,079.5 | 540.2   | 1,062.5 | 1,061.5 | 12 |
| 23 | 1,855.7 | 928.4   |         | 1,837.7 | C+57  | 1,022.5 | 511.7   | 1,005.4 | 1,004.5 | 11 |
| 24 | 1,912.7 | 956.9   |         | 1,894.7 | G     | 862.4   | 431.7   | 845.4   | 844.4   | 10 |
| 25 | 1,999.8 | 1,000.4 |         | 1,981.8 | S     | 805.4   | 403.2   | 788.4   | 787.4   | 9  |
| 26 | 2,056.8 | 1,028.9 |         | 2,038.8 | G     | 718.4   | 359.7   | 701.4   | 700.4   | 8  |
| 27 | 2,113.8 | 1,057.4 |         | 2,095.8 | G     | 661.4   | 331.2   | 644.3   | 643.4   | 7  |
| 28 | 2,200.8 | 1,100.9 |         | 2,182.8 | S     | 604.3   | 302.7   | 587.3   | 586.3   | 6  |
| 29 | 2,287.9 | 1,144.4 |         | 2,269.9 | S     | 517.3   |         | 500.3   | 499.3   | 5  |
| 30 | 2,386.9 | 1,194.0 |         | 2,368.9 | V     | 430.3   |         | 413.3   |         | 4  |
| 31 | 2,444.0 | 1,222.5 |         | 2,426.0 | G     | 331.2   |         | 314.2   |         | 3  |
| 32 | 2,543.0 | 1,272.0 |         | 2,525.0 | V     | 274.2   |         | 257.2   |         | 2  |
| 33 | 2,717.1 | 1,359.1 | 2,700.1 | 2,699.1 | R     | 175.1   |         | 158.1   |         | 1  |

# BMP2K\_HUMAN: SEpSNEDLFGGLVFPFDEITGSQQQK

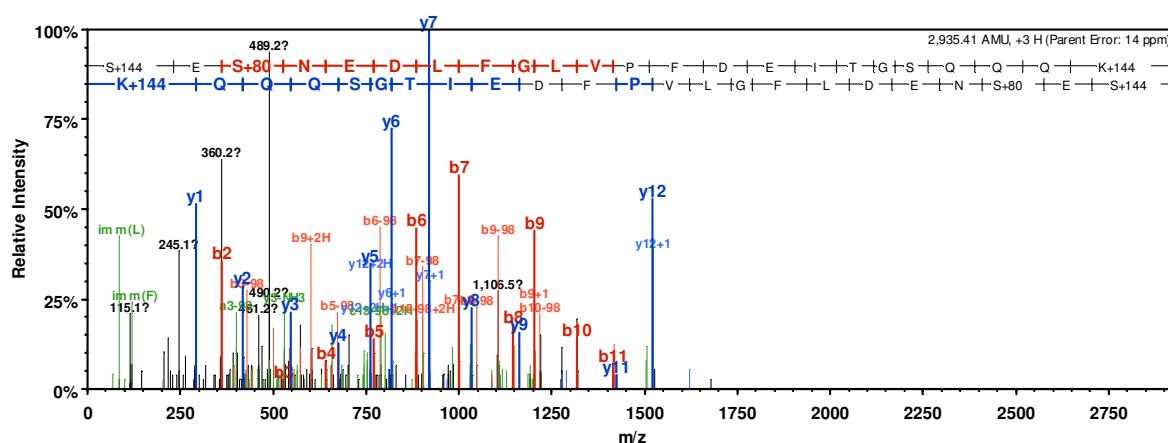

| B  | B Ions  | B+2H    | B-NH3   | B-H2O   | AA    | Y Ions  | Y+2H    | Y-NH3   | Y-H2O   | Y  |
|----|---------|---------|---------|---------|-------|---------|---------|---------|---------|----|
| 1  | 232.1   |         |         | 214.1   | S+144 | 2,936.4 | 1,468.7 | 2,919.4 | 2,918.4 | 23 |
| 2  | 361.2   |         |         | 343.2   | E     | 2,705.2 | 1,353.1 | 2,688.2 | 2,687.2 | 22 |
| 3  | 528.2   |         |         | 510.2   | S+80  | 2,576.2 | 1,288.6 | 2,559.2 | 2,558.2 | 21 |
| 4  | 642.2   |         | 625.2   | 624.2   | N     | 2,409.2 | 1,205.1 | 2,392.2 | 2,391.2 | 20 |
| 5  | 771.3   |         | 754.2   | 753.3   | E     | 2,295.2 | 1,148.1 | 2,278.1 | 2,277.2 | 19 |
| 6  | 886.3   | 443.7   | 869.3   | 868.3   | D     | 2,166.1 | 1,083.6 | 2,149.1 | 2,148.1 | 18 |
| 7  | 999.4   | 500.2   | 982.4   | 981.4   | L     | 2,051.1 | 1,026.1 | 2,034.1 | 2,033.1 | 17 |
| 8  | 1,146.4 | 573.7   | 1,129.4 | 1,128.4 | F     | 1,938.0 | 969.5   | 1,921.0 | 1,920.0 | 16 |
| 9  | 1,203.5 | 602.2   | 1,186.4 | 1,185.5 | G     | 1,790.9 | 896.0   | 1,773.9 | 1,772.9 | 15 |
| 10 | 1,316.6 | 658.8   | 1,299.5 | 1,298.5 | L     | 1,733.9 | 867.5   | 1,716.9 | 1,715.9 | 14 |
| 11 | 1,415.6 | 708.3   | 1,398.6 | 1,397.6 | V     | 1,620.8 | 810.9   | 1,603.8 | 1,602.8 | 13 |
| 12 | 1,512.7 | 756.8   | 1,495.6 | 1,494.7 | P     | 1,521.8 | 761.4   | 1,504.7 | 1,503.8 | 12 |
| 13 | 1,659.7 | 830.4   | 1,642.7 | 1,641.7 | F     | 1,424.7 | 712.9   | 1,407.7 | 1,406.7 | 11 |
| 14 | 1,774.8 | 887.9   | 1,757.7 | 1,756.8 | D     | 1,277.6 | 639.3   | 1,260.6 | 1,259.6 | 10 |
| 15 | 1,903.8 | 952.4   | 1,886.8 | 1,885.8 | E     | 1,162.6 | 581.8   | 1,145.6 | 1,144.6 | 9  |
| 16 | 2,016.9 | 1,009.0 | 1,999.9 | 1,998.9 | I     | 1,033.6 | 517.3   | 1,016.5 | 1,015.6 | 8  |
| 17 | 2,117.9 | 1,059.5 | 2,100.9 | 2,099.9 | T     | 920.5   | 460.8   | 903.5   | 902.5   | 7  |
| 18 | 2,175.0 | 1,088.0 | 2,157.9 | 2,157.0 | G     | 819.4   | 410.2   | 802.4   | 801.4   | 6  |
| 19 | 2,262.0 | 1,131.5 | 2,245.0 | 2,244.0 | S     | 762.4   |         | 745.4   | 744.4   | 5  |
| 20 | 2,390.1 | 1,195.5 | 2,373.0 | 2,372.0 | Q     | 675.4   |         | 658.4   |         | 4  |
| 21 | 2,518.1 | 1,259.6 | 2,501.1 | 2,500.1 | Q     | 547.3   |         | 530.3   |         | 3  |
| 22 | 2,646.2 | 1,323.6 | 2,629.1 | 2,628.2 | Q     | 419.3   |         | 402.2   |         | 2  |
| 23 | 2,936.4 | 1,468.7 | 2,919.4 | 2,918.4 | K+144 | 291.2   |         | 274.2   |         | 1  |

# CD2L7\_HUMAN: GpSPVFLPR

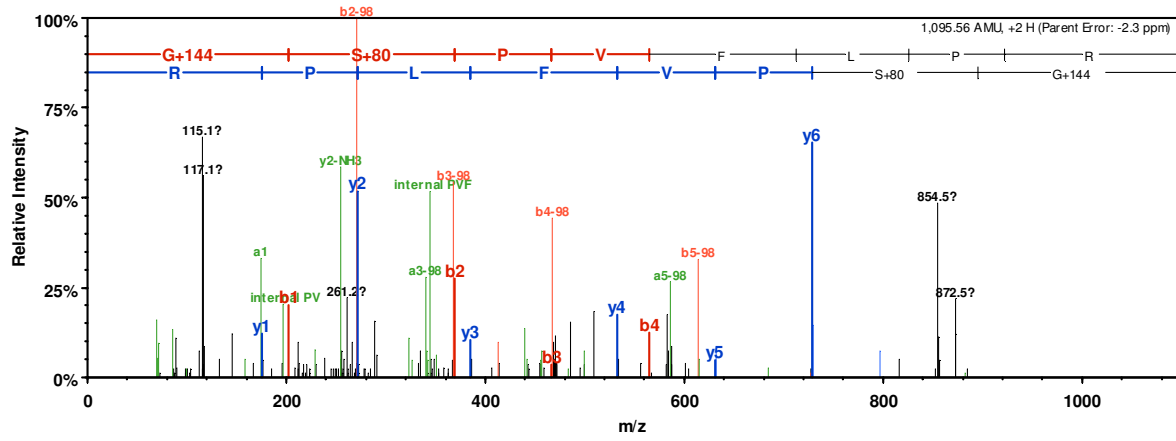

| B | B Ions  | B+2H  | B-NH3   | B-H2O   | AA    | Y Ions  | Y+2H  | Y-NH3   | Y-H2O   | Y |
|---|---------|-------|---------|---------|-------|---------|-------|---------|---------|---|
| 1 | 202.1   |       |         |         | G+144 | 1,096.6 | 548.8 | 1,079.5 | 1,078.6 | 8 |
| 2 | 369.1   |       |         | 351.1   | S+80  | 895.4   | 448.2 | 878.4   | 877.4   | 7 |
| 3 | 466.2   |       |         | 448.2   | P     | 728.4   | 364.7 | 711.4   |         | 6 |
| 4 | 565.3   |       |         | 547.2   | V     | 631.4   |       | 614.4   |         | 5 |
| 5 | 712.3   |       |         | 694.3   | F     | 532.3   |       | 515.3   |         | 4 |
| 6 | 825.4   | 413.2 |         | 807.4   | L     | 385.3   |       | 368.2   |         | 3 |
| 7 | 922.5   | 461.7 |         | 904.4   | P     | 272.2   |       | 255.1   |         | 2 |
| 8 | 1,096.6 | 548.8 | 1,079.5 | 1,078.6 | R     | 175.1   |       | 158.1   |         | 1 |

# CD2L7\_HUMAN: LYNSEESRPYpTNK

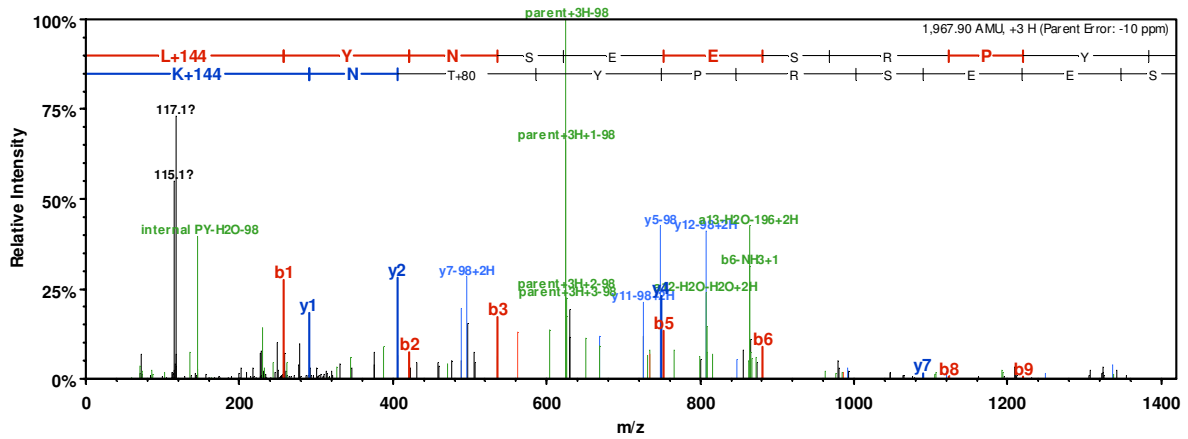

| B  | B Ions  | B+2H  | B-NH3   | B-H2O   | AA    | Y Ions  | Y+2H  | Y-NH3   | Y-H2O   | Y  |
|----|---------|-------|---------|---------|-------|---------|-------|---------|---------|----|
| 1  | 258.2   |       |         |         | L+144 | 1,968.9 | 985.0 | 1,951.9 | 1,950.9 | 13 |
| 2  | 421.3   |       |         |         | Y     | 1,711.7 | 856.4 | 1,694.7 | 1,693.7 | 12 |
| 3  | 535.3   |       | 518.3   |         | N     | 1,548.7 | 774.8 | 1,531.7 | 1,530.7 | 11 |
| 4  | 622.3   |       | 605.3   | 604.3   | S     | 1,434.6 | 717.8 | 1,417.6 | 1,416.6 | 10 |
| 5  | 751.4   |       | 734.3   | 733.4   | E     | 1,347.6 | 674.3 | 1,330.6 | 1,329.6 | 9  |
| 6  | 880.4   | 440.7 | 863.4   | 862.4   | E     | 1,218.6 | 609.8 | 1,201.5 | 1,200.6 | 8  |
| 7  | 967.4   | 484.2 | 950.4   | 949.4   | S     | 1,089.5 | 545.3 | 1,072.5 | 1,071.5 | 7  |
| 8  | 1,123.6 | 562.3 | 1,106.5 | 1,105.5 | R     | 1,002.5 | 501.7 | 985.5   | 984.5   | 6  |
| 9  | 1,220.6 | 610.8 | 1,203.6 | 1,202.6 | P     | 846.4   |       | 829.4   | 828.4   | 5  |
| 10 | 1,383.7 | 692.3 | 1,366.6 | 1,365.7 | Y     | 749.3   |       | 732.3   | 731.3   | 4  |
| 11 | 1,564.7 | 782.8 | 1,547.7 | 1,546.7 | T+80  | 586.3   |       | 569.2   | 568.3   | 3  |
| 12 | 1,678.7 | 839.9 | 1,661.7 | 1,660.7 | N     | 405.3   |       | 388.2   |         | 2  |
| 13 | 1,968.9 | 985.0 | 1,951.9 | 1,950.9 | K+144 | 291.2   |       | 274.2   |         | 1  |

# CDC2\_HUMAN: VYpTHEVVTLWYR

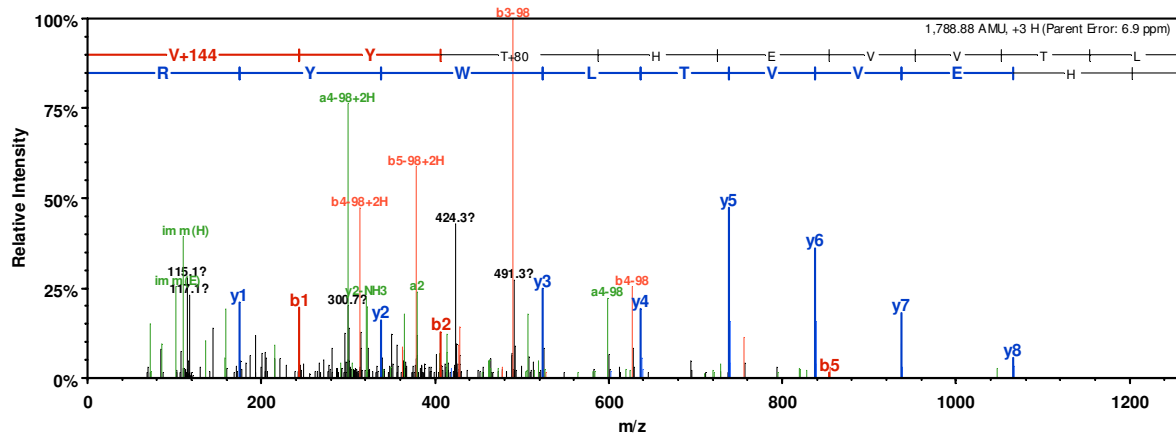

| B  | B Ions  | B+2H  | B-NH3   | B-H2O   | AA    | Y Ions  | Y+2H  | Y-NH3   | Y-H2O   | Y  |
|----|---------|-------|---------|---------|-------|---------|-------|---------|---------|----|
| 1  | 244.2   |       |         |         | V+144 | 1,789.9 | 895.4 | 1,772.9 | 1,771.9 | 12 |
| 2  | 407.2   |       |         |         | Y     | 1,546.7 | 773.9 | 1,529.7 | 1,528.7 | 11 |
| 3  | 588.3   |       |         | 570.2   | T+80  | 1,383.6 | 692.3 | 1,366.6 | 1,365.6 | 10 |
| 4  | 725.3   | 363.2 |         | 707.3   | H     | 1,202.6 | 601.8 | 1,185.6 | 1,184.6 | 9  |
| 5  | 854.4   | 427.7 |         | 836.3   | E     | 1,065.6 | 533.3 | 1,048.5 | 1,047.6 | 8  |
| 6  | 953.4   | 477.2 |         | 935.4   | V     | 936.5   | 468.8 | 919.5   | 918.5   | 7  |
| 7  | 1,052.5 | 526.8 |         | 1,034.5 | V     | 837.5   | 419.2 | 820.4   | 819.5   | 6  |
| 8  | 1,153.5 | 577.3 |         | 1,135.5 | T     | 738.4   |       | 721.4   | 720.4   | 5  |
| 9  | 1,266.6 | 633.8 |         | 1,248.6 | L     | 637.3   |       | 620.3   |         | 4  |
| 10 | 1,452.7 | 726.9 |         | 1,434.7 | W     | 524.3   |       | 507.2   |         | 3  |
| 11 | 1,615.8 | 808.4 |         | 1,597.8 | Y     | 338.2   |       | 321.2   |         | 2  |
| 12 | 1,789.9 | 895.4 | 1,772.9 | 1,771.9 | R     | 175.1   |       | 158.1   |         | 1  |



# CDC2\_HUMAN: YLDpSIPPGQYMDSSLVK

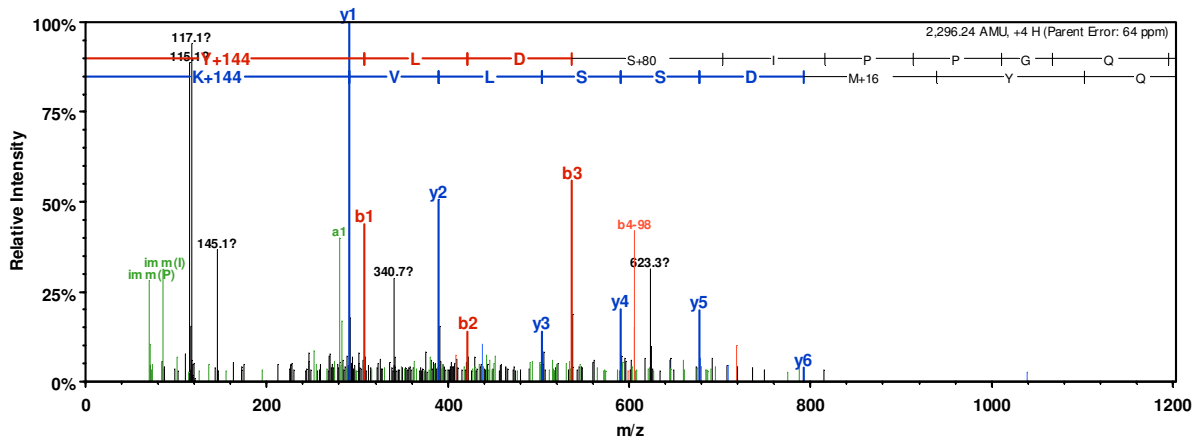

| B  | B Ions  | B+2H    | B-NH3   | B-H2O   | AA    | Y Ions  | Y+2H    | Y-NH3   | Y-H2O   | Y       |
|----|---------|---------|---------|---------|-------|---------|---------|---------|---------|---------|
| 1  | 308.2   |         |         |         |       | Y+144   | 2,297.1 | 1,149.1 | 2,280.1 | 2,279.1 |
| 2  | 421.3   |         |         |         |       | L       | 1,989.9 | 995.5   | 1,972.9 | 1,971.9 |
| 3  | 536.3   |         |         | 518.3   | D     | 1,876.9 | 938.9   | 1,859.8 | 1,858.8 |         |
| 4  | 703.3   |         |         | 685.3   | S+80  | 1,761.8 | 881.4   | 1,744.8 | 1,743.8 |         |
| 5  | 816.4   |         |         | 798.4   | I     | 1,594.8 | 797.9   | 1,577.8 | 1,576.8 |         |
| 6  | 913.4   | 457.2   |         | 895.4   | P     | 1,481.7 | 741.4   | 1,464.7 | 1,463.7 |         |
| 7  | 1,010.5 | 505.7   |         | 992.5   | P     | 1,384.7 | 692.8   | 1,367.7 | 1,366.7 |         |
| 8  | 1,067.5 | 534.3   |         | 1,049.5 | G     | 1,287.6 | 644.3   | 1,270.6 | 1,269.6 |         |
| 9  | 1,195.6 | 598.3   | 1,178.5 | 1,177.5 | Q     | 1,230.6 | 615.8   | 1,213.6 | 1,212.6 |         |
| 10 | 1,358.6 | 679.8   | 1,341.6 | 1,340.6 | Y     | 1,102.6 | 551.8   | 1,085.5 | 1,084.5 |         |
| 11 | 1,505.7 | 753.3   | 1,488.6 | 1,487.6 | M+16  | 939.5   | 470.3   | 922.5   | 921.5   |         |
| 12 | 1,620.7 | 810.8   | 1,603.7 | 1,602.7 | D     | 792.5   | 396.7   | 775.4   | 774.4   |         |
| 13 | 1,707.7 | 854.4   | 1,690.7 | 1,689.7 | S     | 677.4   |         | 660.4   | 659.4   |         |
| 14 | 1,794.7 | 897.9   | 1,777.7 | 1,776.7 | S     | 590.4   |         | 573.4   | 572.4   |         |
| 15 | 1,907.8 | 954.4   | 1,890.8 | 1,889.8 | L     | 503.4   |         | 486.3   |         |         |
| 16 | 2,006.9 | 1,004.0 | 1,989.9 | 1,988.9 | V     | 390.3   |         | 373.3   |         |         |
| 17 | 2,297.1 | 1,149.1 | 2,280.1 | 2,279.1 | K+144 | 291.2   |         | 274.2   |         |         |

# CDK2\_HUMAN: IGEGpTpYGVVYK

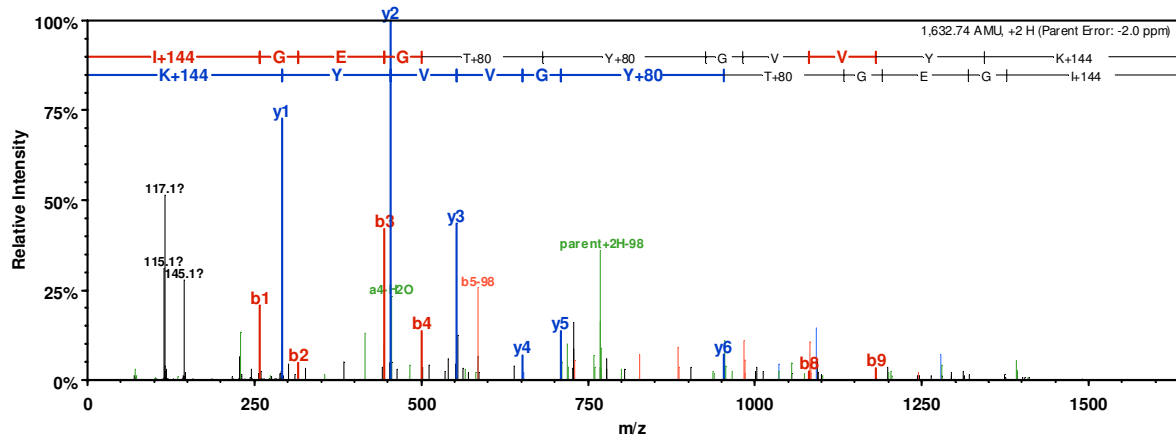

| B  | B Ions  | B+2H  | B-NH3   | B-H2O   | AA    | Y Ions  | Y+2H  | Y-NH3   | Y-H2O   | Y  |
|----|---------|-------|---------|---------|-------|---------|-------|---------|---------|----|
| 1  | 258.2   |       |         |         | I+144 | 1,633.8 | 817.4 | 1,616.7 | 1,615.7 | 11 |
| 2  | 315.2   |       |         |         | G     | 1,376.6 | 688.8 | 1,359.5 | 1,358.6 | 10 |
| 3  | 444.3   |       |         | 426.2   | E     | 1,319.5 | 660.3 | 1,302.5 | 1,301.5 | 9  |
| 4  | 501.3   |       |         | 483.3   | G     | 1,190.5 | 595.8 | 1,173.5 | 1,172.5 | 8  |
| 5  | 682.3   |       |         | 664.3   | T+80  | 1,133.5 | 567.2 | 1,116.5 | 1,115.5 | 7  |
| 6  | 925.3   | 463.2 |         | 907.3   | Y+80  | 952.5   | 476.7 | 935.4   |         | 6  |
| 7  | 982.3   | 491.7 |         | 964.3   | G     | 709.4   |       | 692.4   |         | 5  |
| 8  | 1,081.4 | 541.2 |         | 1,063.4 | V     | 652.4   |       | 635.4   |         | 4  |
| 9  | 1,180.5 | 590.7 |         | 1,162.5 | V     | 553.3   |       | 536.3   |         | 3  |
| 10 | 1,343.5 | 672.3 |         | 1,325.5 | Y     | 454.3   |       | 437.3   |         | 2  |
| 11 | 1,633.8 | 817.4 | 1,616.7 | 1,615.7 | K+144 | 291.2   |       | 274.2   |         | 1  |

# CDK2\_HUMAN: IGEGpTYGVVYK

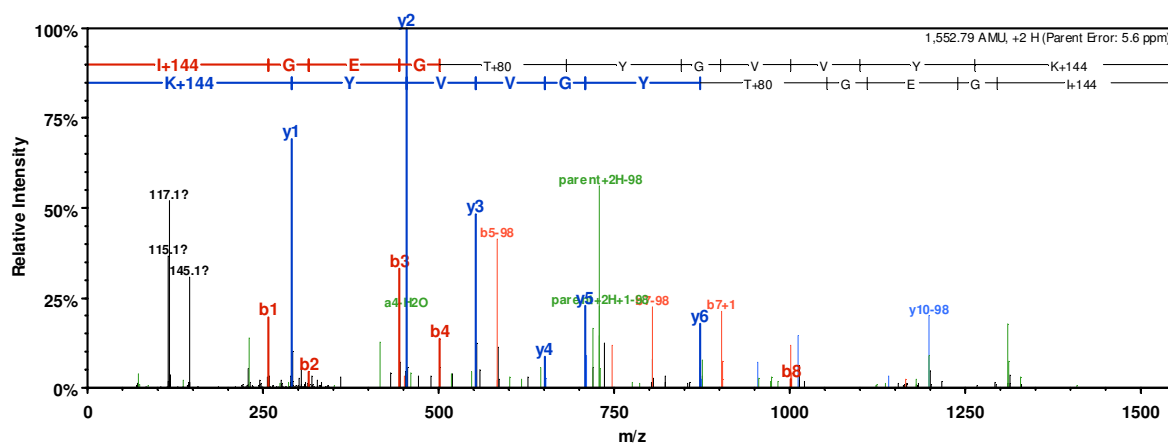

| B  | B Ions  | B+2H  | B-NH3   | B-H2O   | AA    | Y Ions  | Y+2H  | Y-NH3   | Y-H2O   | Y  |
|----|---------|-------|---------|---------|-------|---------|-------|---------|---------|----|
| 1  | 258.2   |       |         |         | I+144 | 1,553.8 | 777.4 | 1,536.8 | 1,535.8 | 11 |
| 2  | 315.2   |       |         |         | G     | 1,296.6 | 648.8 | 1,279.6 | 1,278.6 | 10 |
| 3  | 444.3   |       |         | 426.2   | E     | 1,239.6 | 620.3 | 1,222.6 | 1,221.6 | 9  |
| 4  | 501.3   |       |         | 483.3   | G     | 1,110.5 | 555.8 | 1,093.5 | 1,092.5 | 8  |
| 5  | 682.3   |       |         | 664.3   | T+80  | 1,053.5 | 527.3 | 1,036.5 | 1,035.5 | 7  |
| 6  | 845.4   | 423.2 |         | 827.3   | Y     | 872.5   | 436.8 | 855.5   |         | 6  |
| 7  | 902.4   | 451.7 |         | 884.4   | G     | 709.4   |       | 692.4   |         | 5  |
| 8  | 1,001.4 | 501.2 |         | 983.4   | V     | 652.4   |       | 635.4   |         | 4  |
| 9  | 1,100.5 | 550.8 |         | 1,082.5 | V     | 553.3   |       | 536.3   |         | 3  |
| 10 | 1,263.6 | 632.3 |         | 1,245.6 | Y     | 454.3   |       | 437.3   |         | 2  |
| 11 | 1,553.8 | 777.4 | 1,536.8 | 1,535.8 | K+144 | 291.2   |       | 274.2   |         | 1  |

# CDK2\_HUMAN: IGEGT<sup>p</sup>YGVVYK

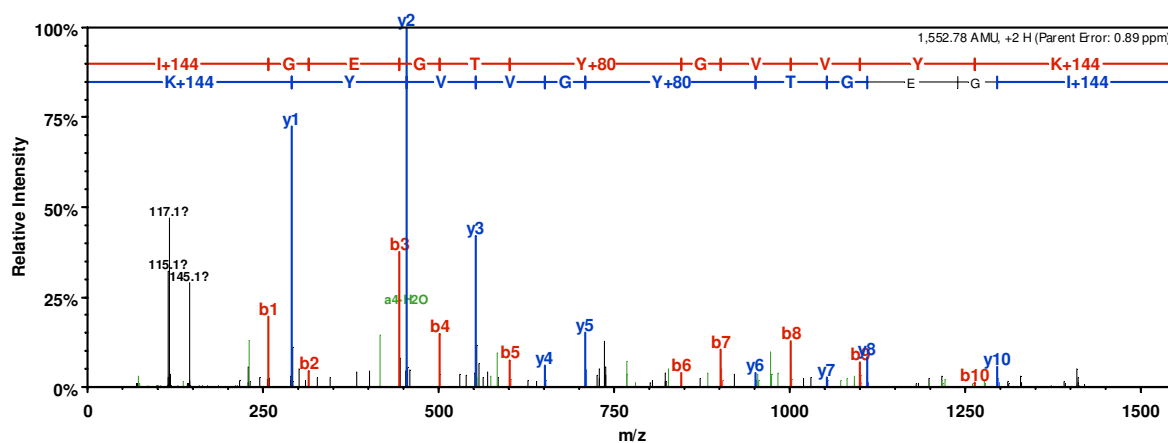

| B  | B Ions  | B+2H  | B-NH3   | B-H2O   | AA    | Y Ions  | Y+2H  | Y-NH3   | Y-H2O   | Y  |
|----|---------|-------|---------|---------|-------|---------|-------|---------|---------|----|
| 1  | 258.2   |       |         |         | I+144 | 1,553.8 | 777.4 | 1,536.8 | 1,535.8 | 11 |
| 2  | 315.2   |       |         |         | G     | 1,296.6 | 648.8 | 1,279.6 | 1,278.6 | 10 |
| 3  | 444.3   |       |         | 426.2   | E     | 1,239.6 | 620.3 | 1,222.6 | 1,221.6 | 9  |
| 4  | 501.3   |       |         | 483.3   | G     | 1,110.5 | 555.8 | 1,093.5 | 1,092.5 | 8  |
| 5  | 602.3   |       |         | 584.3   | T     | 1,053.5 | 527.3 | 1,036.5 | 1,035.5 | 7  |
| 6  | 845.4   | 423.2 |         | 827.3   | Y+80  | 952.5   | 476.7 | 935.4   |         | 6  |
| 7  | 902.4   | 451.7 |         | 884.4   | G     | 709.4   |       | 692.4   |         | 5  |
| 8  | 1,001.4 | 501.2 |         | 983.4   | V     | 652.4   |       | 635.4   |         | 4  |
| 9  | 1,100.5 | 550.8 |         | 1,082.5 | V     | 553.3   |       | 536.3   |         | 3  |
| 10 | 1,263.6 | 632.3 |         | 1,245.6 | Y     | 454.3   |       | 437.3   |         | 2  |
| 11 | 1,553.8 | 777.4 | 1,536.8 | 1,535.8 | K+144 | 291.2   |       | 274.2   |         | 1  |

# CDK2\_HUMAN: IGEGTYGVVpYK

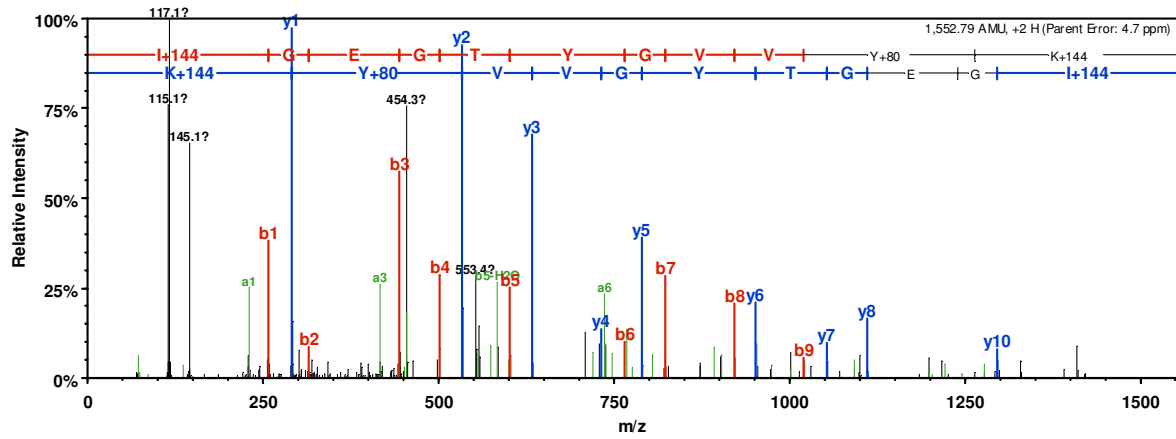

| B  | B Ions  | B+2H  | B-NH3   | B-H2O   | AA    | Y Ions  | Y+2H  | Y-NH3   | Y-H2O   | Y  |
|----|---------|-------|---------|---------|-------|---------|-------|---------|---------|----|
| 1  | 258.2   |       |         |         | I+144 | 1,553.8 | 777.4 | 1,536.8 | 1,535.8 | 11 |
| 2  | 315.2   |       |         |         | G     | 1,296.6 | 648.8 | 1,279.6 | 1,278.6 | 10 |
| 3  | 444.3   |       |         | 426.2   | E     | 1,239.6 | 620.3 | 1,222.6 | 1,221.6 | 9  |
| 4  | 501.3   |       |         | 483.3   | G     | 1,110.5 | 555.8 | 1,093.5 | 1,092.5 | 8  |
| 5  | 602.3   |       |         | 584.3   | T     | 1,053.5 | 527.3 | 1,036.5 | 1,035.5 | 7  |
| 6  | 765.4   | 383.2 |         | 747.4   | Y     | 952.5   | 476.7 | 935.4   |         | 6  |
| 7  | 822.4   | 411.7 |         | 804.4   | G     | 789.4   |       | 772.4   |         | 5  |
| 8  | 921.5   | 461.2 |         | 903.5   | V     | 732.4   |       | 715.4   |         | 4  |
| 9  | 1,020.5 | 510.8 |         | 1,002.5 | V     | 633.3   |       | 616.3   |         | 3  |
| 10 | 1,263.6 | 632.3 |         | 1,245.6 | Y+80  | 534.2   |       | 517.2   |         | 2  |
| 11 | 1,553.8 | 777.4 | 1,536.8 | 1,535.8 | K+144 | 291.2   |       | 274.2   |         | 1  |

# CDK2\_HUMAN: TYpTHEVVTLWYR

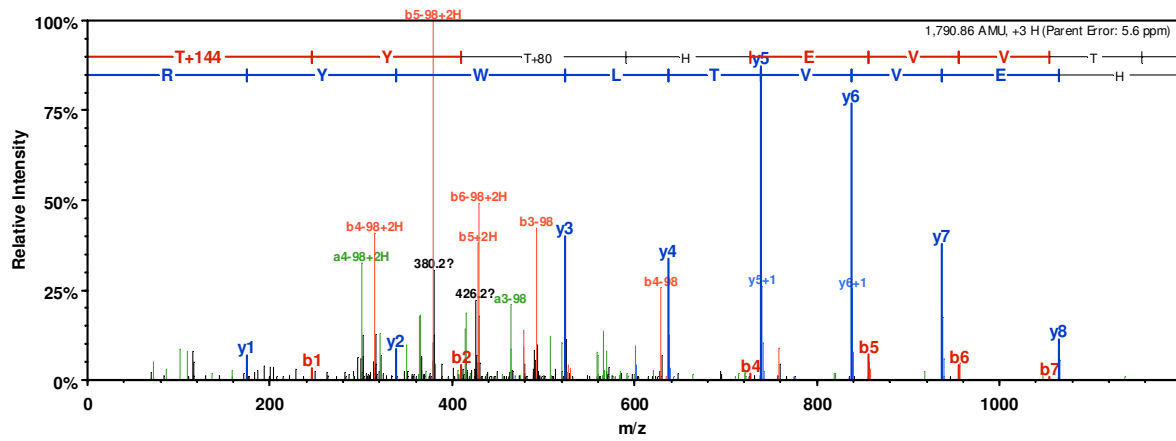

| B  | B Ions  | B+2H  | B-NH3   | B-H2O   | AA    | Y Ions  | Y+2H  | Y-NH3   | Y-H2O   | Y  |
|----|---------|-------|---------|---------|-------|---------|-------|---------|---------|----|
| 1  | 246.2   |       |         | 228.1   | T+144 | 1,791.9 | 896.4 | 1,774.8 | 1,773.8 | 12 |
| 2  | 409.2   |       |         | 391.2   | Y     | 1,546.7 | 773.9 | 1,529.7 | 1,528.7 | 11 |
| 3  | 590.2   |       |         | 572.2   | T+80  | 1,383.6 | 692.3 | 1,366.6 | 1,365.6 | 10 |
| 4  | 727.3   | 364.2 |         | 709.3   | H     | 1,202.6 | 601.8 | 1,185.6 | 1,184.6 | 9  |
| 5  | 856.3   | 428.7 |         | 838.3   | E     | 1,065.6 | 533.3 | 1,048.5 | 1,047.6 | 8  |
| 6  | 955.4   | 478.2 |         | 937.4   | V     | 936.5   | 468.8 | 919.5   | 918.5   | 7  |
| 7  | 1,054.5 | 527.7 |         | 1,036.5 | V     | 837.5   | 419.2 | 820.4   | 819.5   | 6  |
| 8  | 1,155.5 | 578.3 |         | 1,137.5 | T     | 738.4   |       | 721.4   | 720.4   | 5  |
| 9  | 1,268.6 | 634.8 |         | 1,250.6 | L     | 637.3   |       | 620.3   |         | 4  |
| 10 | 1,454.7 | 727.8 |         | 1,436.7 | W     | 524.3   |       | 507.2   |         | 3  |
| 11 | 1,617.7 | 809.4 |         | 1,599.7 | Y     | 338.2   |       | 321.2   |         | 2  |
| 12 | 1,791.9 | 896.4 | 1,774.8 | 1,773.8 | R     | 175.1   |       | 158.1   |         | 1  |

# CDK5\_HUMAN: IGEGTYGpTVFK

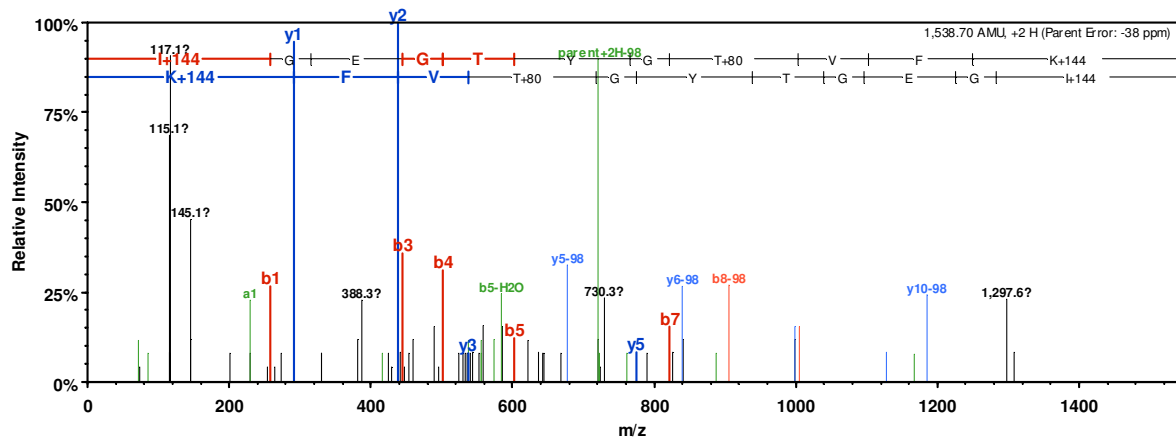

| B  | B Ions | B+2H  | B-NH3  | B-H2O  | AA    | Y Ions | Y+2H  | Y-NH3  | Y-H2O  | Y  |
|----|--------|-------|--------|--------|-------|--------|-------|--------|--------|----|
| 1  | 258.2  |       |        |        | I+144 | 1539.8 | 770.4 | 1522.7 | 1521.8 | 11 |
| 2  | 315.2  |       |        |        | G     | 1282.6 | 641.8 | 1265.6 | 1264.6 | 10 |
| 3  | 444.3  |       |        | 426.2  | E     | 1225.6 | 613.3 | 1208.5 | 1207.6 | 9  |
| 4  | 501.3  |       |        | 483.3  | G     | 1096.5 | 548.8 | 1079.5 | 1078.5 | 8  |
| 5  | 602.3  |       |        | 584.3  | T     | 1039.5 | 520.3 | 1022.5 | 1021.5 | 7  |
| 6  | 765.4  | 383.2 |        | 747.4  | Y     | 938.5  | 469.7 | 921.4  | 920.4  | 6  |
| 7  | 822.4  | 411.7 |        | 804.4  | G     | 775.4  |       | 758.4  | 757.4  | 5  |
| 8  | 1003.4 | 502.2 |        | 985.4  | T+80  | 718.4  |       | 701.3  | 700.4  | 4  |
| 9  | 1102.5 | 551.8 |        | 1084.5 | V     | 537.4  |       | 520.3  |        | 3  |
| 10 | 1249.6 | 625.3 |        | 1231.6 | F     | 438.3  |       | 421.3  |        | 2  |
| 11 | 1539.8 | 770.4 | 1522.7 | 1521.8 | K+144 | 291.2  |       | 274.2  |        | 1  |

# CDK9\_HUMAN: NPApTTNQTEFER

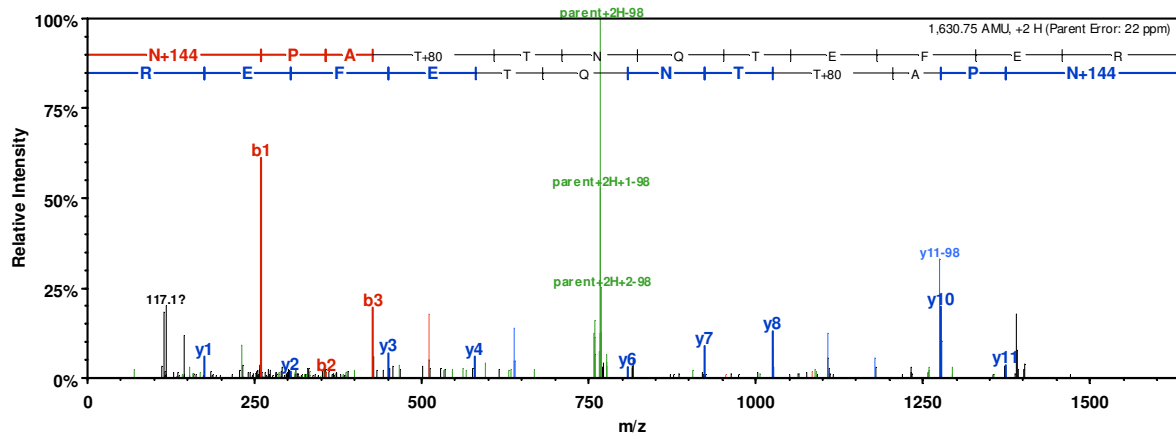

| B  | B Ions  | B+2H  | B-NH3   | B-H2O   | AA    | Y Ions  | Y+2H  | Y-NH3   | Y-H2O   | Y  |
|----|---------|-------|---------|---------|-------|---------|-------|---------|---------|----|
| 1  | 259.2   |       | 242.1   |         | N+144 | 1,631.7 | 816.4 | 1,614.7 | 1,613.7 | 12 |
| 2  | 356.2   |       | 339.2   |         | P     | 1,373.6 | 687.3 | 1,356.5 | 1,355.6 | 11 |
| 3  | 427.2   |       | 410.2   |         | A     | 1,276.5 | 638.8 | 1,259.5 | 1,258.5 | 10 |
| 4  | 608.3   |       | 591.2   | 590.2   | T+80  | 1,205.5 | 603.2 | 1,188.5 | 1,187.5 | 9  |
| 5  | 709.3   |       | 692.3   | 691.3   | T     | 1,024.5 | 512.7 | 1,007.4 | 1,006.5 | 8  |
| 6  | 823.3   | 412.2 | 806.3   | 805.3   | N     | 923.4   | 462.2 | 906.4   | 905.4   | 7  |
| 7  | 951.4   | 476.2 | 934.4   | 933.4   | Q     | 809.4   | 405.2 | 792.4   | 791.4   | 6  |
| 8  | 1,052.5 | 526.7 | 1,035.4 | 1,034.4 | T     | 681.3   |       | 664.3   | 663.3   | 5  |
| 9  | 1,181.5 | 591.3 | 1,164.5 | 1,163.5 | E     | 580.3   |       | 563.2   | 562.3   | 4  |
| 10 | 1,328.6 | 664.8 | 1,311.5 | 1,310.6 | F     | 451.2   |       | 434.2   | 433.2   | 3  |
| 11 | 1,457.6 | 729.3 | 1,440.6 | 1,439.6 | E     | 304.2   |       | 287.1   | 286.2   | 2  |
| 12 | 1,631.7 | 816.4 | 1,614.7 | 1,613.7 | R     | 175.1   |       | 158.1   |         | 1  |



# CDKL5\_HUMAN: TLLpSPSGR

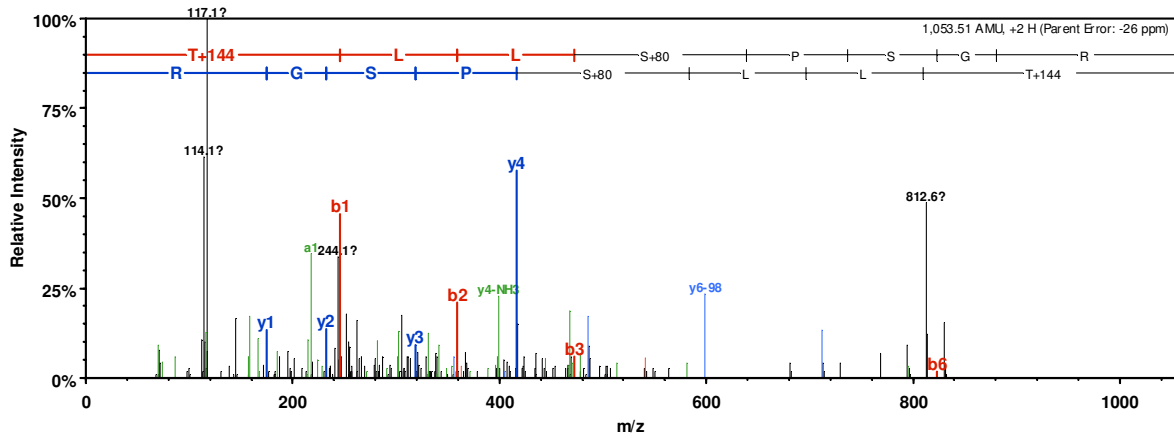

| B | B Ions  | B+2H  | B-NH3   | B-H2O   | AA    | Y Ions  | Y+2H  | Y-NH3   | Y-H2O   | Y |
|---|---------|-------|---------|---------|-------|---------|-------|---------|---------|---|
| 1 | 246.2   |       |         | 228.1   | T+144 | 1,054.5 | 527.8 | 1,037.5 | 1,036.5 | 8 |
| 2 | 359.2   |       |         | 341.2   | L     | 809.4   | 405.2 | 792.4   | 791.4   | 7 |
| 3 | 472.3   |       |         | 454.3   | L     | 696.3   | 348.7 | 679.3   | 678.3   | 6 |
| 4 | 639.3   |       |         | 621.3   | S+80  | 583.2   |       | 566.2   | 565.2   | 5 |
| 5 | 736.4   |       |         | 718.4   | P     | 416.2   |       | 399.2   | 398.2   | 4 |
| 6 | 823.4   | 412.2 |         | 805.4   | S     | 319.2   |       | 302.1   | 301.2   | 3 |
| 7 | 880.4   | 440.7 |         | 862.4   | G     | 232.1   |       | 215.1   |         | 2 |
| 8 | 1,054.5 | 527.8 | 1,037.5 | 1,036.5 | R     | 175.1   |       | 158.1   |         | 1 |

# CDKL5\_HUMAN: VPSRPDNP<sup>S</sup>FHENNVSTR

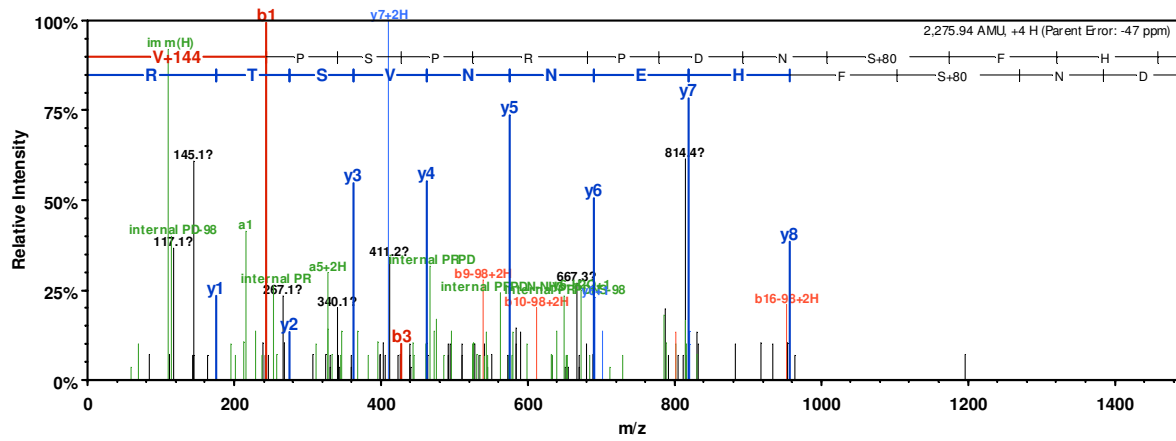

| B  | B Ions  | B+2H    | B-NH3   | B-H2O   | AA    | Y Ions  | Y+2H    | Y-NH3   | Y-H2O   | Y  |
|----|---------|---------|---------|---------|-------|---------|---------|---------|---------|----|
| 1  | 244.2   |         |         |         | V+144 | 2,277.1 | 1,139.0 | 2,260.0 | 2,259.0 | 18 |
| 2  | 341.2   |         |         |         | P     | 2,033.9 | 1,017.4 | 2,016.9 | 2,015.9 | 17 |
| 3  | 428.3   |         |         | 410.3   | S     | 1,936.8 | 968.9   | 1,919.8 | 1,918.8 | 16 |
| 4  | 525.3   |         |         | 507.3   | P     | 1,849.8 | 925.4   | 1,832.8 | 1,831.8 | 15 |
| 5  | 681.4   | 341.2   | 664.4   | 663.4   | R     | 1,752.7 | 876.9   | 1,735.7 | 1,734.7 | 14 |
| 6  | 778.5   | 389.7   | 761.4   | 760.5   | P     | 1,596.6 | 798.8   | 1,579.6 | 1,578.6 | 13 |
| 7  | 893.5   | 447.3   | 876.5   | 875.5   | D     | 1,499.6 | 750.3   | 1,482.6 | 1,481.6 | 12 |
| 8  | 1,007.5 | 504.3   | 990.5   | 989.5   | N     | 1,384.6 | 692.8   | 1,367.5 | 1,366.6 | 11 |
| 9  | 1,174.5 | 587.8   | 1,157.5 | 1,156.5 | S+80  | 1,270.5 | 635.8   | 1,253.5 | 1,252.5 | 10 |
| 10 | 1,321.6 | 661.3   | 1,304.6 | 1,303.6 | F     | 1,103.5 | 552.3   | 1,086.5 | 1,085.5 | 9  |
| 11 | 1,458.7 | 729.8   | 1,441.6 | 1,440.7 | H     | 956.5   | 478.7   | 939.4   | 938.4   | 8  |
| 12 | 1,587.7 | 794.4   | 1,570.7 | 1,569.7 | E     | 819.4   | 410.2   | 802.4   | 801.4   | 7  |
| 13 | 1,701.8 | 851.4   | 1,684.7 | 1,683.7 | N     | 690.4   | 345.7   | 673.3   | 672.3   | 6  |
| 14 | 1,815.8 | 908.4   | 1,798.8 | 1,797.8 | N     | 576.3   |         | 559.3   | 558.3   | 5  |
| 15 | 1,914.9 | 957.9   | 1,897.8 | 1,896.9 | V     | 462.3   |         | 445.2   | 444.3   | 4  |
| 16 | 2,001.9 | 1,001.5 | 1,984.9 | 1,983.9 | S     | 363.2   |         | 346.2   | 345.2   | 3  |
| 17 | 2,102.9 | 1,052.0 | 2,085.9 | 2,084.9 | T     | 276.2   |         | 259.1   | 258.2   | 2  |
| 18 | 2,277.1 | 1,139.0 | 2,260.0 | 2,259.0 | R     | 175.1   |         | 158.1   |         | 1  |

# CLK1\_HUMAN: pSVEDDEEGHLCQSGDVL SAR

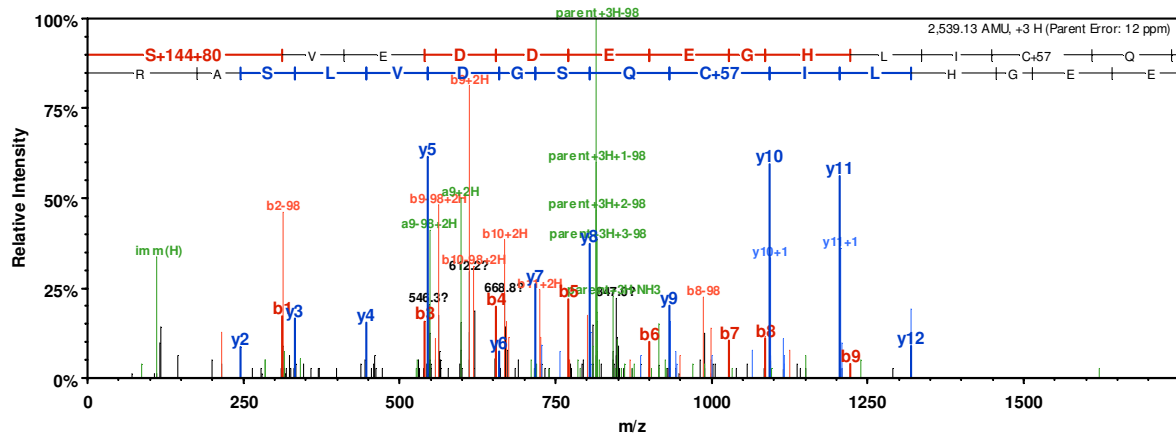

| B  | B Ions  | B+2H    | B-NH3   | B-H2O   | AA    | Y Ions  | Y+2H    | Y-NH3   | Y-H2O   | Y  |
|----|---------|---------|---------|---------|-------|---------|---------|---------|---------|----|
| 1  | 312.1   |         |         | 294.1   | S+224 | 2,540.1 | 1,270.6 | 2,523.1 | 2,522.1 | 21 |
| 2  | 411.2   |         |         | 393.2   | V     | 2,229.0 | 1,115.0 | 2,212.0 | 2,211.0 | 20 |
| 3  | 540.2   |         |         | 522.2   | E     | 2,129.9 | 1,065.5 | 2,112.9 | 2,111.9 | 19 |
| 4  | 655.2   |         |         | 637.2   | D     | 2,000.9 | 1,001.0 | 1,983.9 | 1,982.9 | 18 |
| 5  | 770.3   |         |         | 752.3   | D     | 1,885.9 | 943.4   | 1,868.8 | 1,867.9 | 17 |
| 6  | 899.3   | 450.2   |         | 881.3   | E     | 1,770.8 | 885.9   | 1,753.8 | 1,752.8 | 16 |
| 7  | 1,028.4 | 514.7   |         | 1,010.3 | E     | 1,641.8 | 821.4   | 1,624.8 | 1,623.8 | 15 |
| 8  | 1,085.4 | 543.2   |         | 1,067.4 | G     | 1,512.8 | 756.9   | 1,495.7 | 1,494.7 | 14 |
| 9  | 1,222.4 | 611.7   |         | 1,204.4 | H     | 1,455.7 | 728.4   | 1,438.7 | 1,437.7 | 13 |
| 10 | 1,335.5 | 668.3   |         | 1,317.5 | L     | 1,318.7 | 659.8   | 1,301.7 | 1,300.7 | 12 |
| 11 | 1,448.6 | 724.8   |         | 1,430.6 | I     | 1,205.6 | 603.3   | 1,188.6 | 1,187.6 | 11 |
| 12 | 1,608.6 | 804.8   |         | 1,590.6 | C+57  | 1,092.5 | 546.8   | 1,075.5 | 1,074.5 | 10 |
| 13 | 1,736.7 | 868.9   | 1,719.7 | 1,718.7 | Q     | 932.5   | 466.7   | 915.5   | 914.5   | 9  |
| 14 | 1,823.7 | 912.4   | 1,806.7 | 1,805.7 | S     | 804.4   | 402.7   | 787.4   | 786.4   | 8  |
| 15 | 1,880.7 | 940.9   | 1,863.7 | 1,862.7 | G     | 717.4   | 359.2   | 700.4   | 699.4   | 7  |
| 16 | 1,995.8 | 998.4   | 1,978.8 | 1,977.8 | D     | 660.4   | 330.7   | 643.3   | 642.4   | 6  |
| 17 | 2,094.8 | 1,047.9 | 2,077.8 | 2,076.8 | V     | 545.3   |         | 528.3   | 527.3   | 5  |
| 18 | 2,207.9 | 1,104.5 | 2,190.9 | 2,189.9 | L     | 446.3   |         | 429.2   | 428.3   | 4  |
| 19 | 2,295.0 | 1,148.0 | 2,277.9 | 2,277.0 | S     | 333.2   |         | 316.2   | 315.2   | 3  |
| 20 | 2,366.0 | 1,183.5 | 2,349.0 | 2,348.0 | A     | 246.2   |         | 229.1   |         | 2  |
| 21 | 2,540.1 | 1,270.6 | 2,523.1 | 2,522.1 | R     | 175.1   |         | 158.1   |         | 1  |

# CLK2\_HUMAN: AKpSVEDDAEGHLYHVGDWLQER

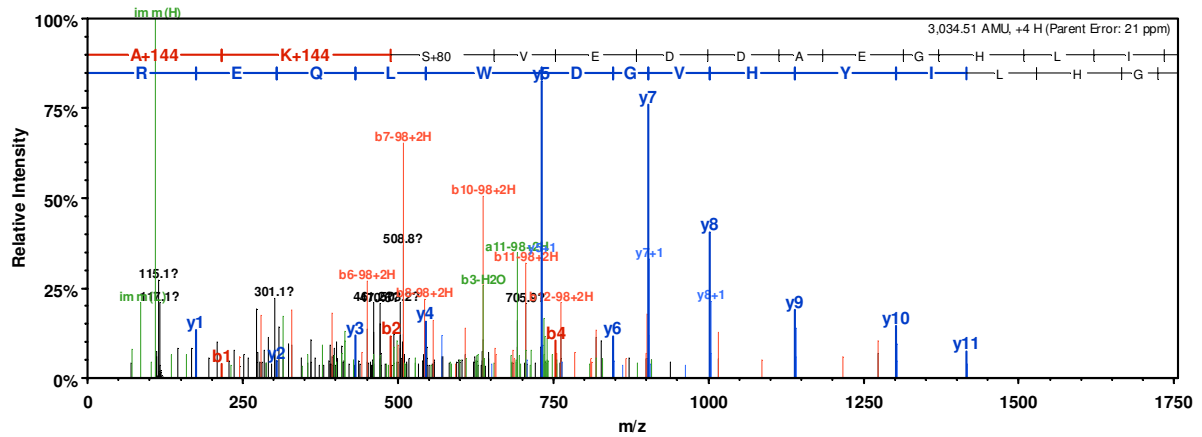

| B  | B Ions  | B+2H    | B-NH3   | B-H2O   | AA    | Y Ions  | Y+2H    | Y-NH3   | Y-H2O   | Y  |
|----|---------|---------|---------|---------|-------|---------|---------|---------|---------|----|
| 1  | 216.1   |         |         |         | A+144 | 3,035.5 | 1,518.2 | 3,018.4 | 3,017.4 | 23 |
| 2  | 488.3   | 244.7   | 471.3   |         | K+144 | 2,820.3 | 1,410.7 | 2,803.3 | 2,802.3 | 22 |
| 3  | 655.3   | 328.2   | 638.3   | 637.3   | S+80  | 2,548.1 | 1,274.6 | 2,531.1 | 2,530.1 | 21 |
| 4  | 754.4   | 377.7   | 737.4   | 736.4   | Y     | 2,381.1 | 1,191.1 | 2,364.1 | 2,363.1 | 20 |
| 5  | 883.5   | 442.2   | 866.4   | 865.4   | E     | 2,282.0 | 1,141.5 | 2,265.0 | 2,264.0 | 19 |
| 6  | 998.5   | 499.7   | 981.5   | 980.5   | D     | 2,153.0 | 1,077.0 | 2,136.0 | 2,135.0 | 18 |
| 7  | 1,113.5 | 557.3   | 1,096.5 | 1,095.5 | D     | 2,038.0 | 1,019.5 | 2,021.0 | 2,020.0 | 17 |
| 8  | 1,184.5 | 592.8   | 1,167.5 | 1,166.5 | A     | 1,923.0 | 962.0   | 1,905.9 | 1,904.9 | 16 |
| 9  | 1,313.6 | 657.3   | 1,296.6 | 1,295.6 | E     | 1,851.9 | 926.5   | 1,834.9 | 1,833.9 | 15 |
| 10 | 1,370.6 | 685.8   | 1,353.6 | 1,352.6 | G     | 1,722.9 | 861.9   | 1,705.8 | 1,704.9 | 14 |
| 11 | 1,507.7 | 754.3   | 1,490.6 | 1,489.7 | H     | 1,665.9 | 833.4   | 1,648.8 | 1,647.8 | 13 |
| 12 | 1,620.8 | 810.9   | 1,603.7 | 1,602.7 | L     | 1,528.8 | 764.9   | 1,511.8 | 1,510.8 | 12 |
| 13 | 1,733.8 | 867.4   | 1,716.8 | 1,715.8 | I     | 1,415.7 | 708.4   | 1,398.7 | 1,397.7 | 11 |
| 14 | 1,896.9 | 949.0   | 1,879.9 | 1,878.9 | Y     | 1,302.6 | 651.8   | 1,285.6 | 1,284.6 | 10 |
| 15 | 2,034.0 | 1,017.5 | 2,016.9 | 2,015.9 | H     | 1,139.6 | 570.3   | 1,122.5 | 1,121.5 | 9  |
| 16 | 2,133.0 | 1,067.0 | 2,116.0 | 2,115.0 | V     | 1,002.5 | 501.8   | 985.5   | 984.5   | 8  |
| 17 | 2,190.0 | 1,095.5 | 2,173.0 | 2,172.0 | G     | 903.4   | 452.2   | 886.4   | 885.4   | 7  |
| 18 | 2,305.1 | 1,153.0 | 2,288.0 | 2,287.1 | D     | 846.4   | 423.7   | 829.4   | 828.4   | 6  |
| 19 | 2,491.2 | 1,246.1 | 2,474.1 | 2,473.1 | W     | 731.4   |         | 714.4   | 713.4   | 5  |
| 20 | 2,604.2 | 1,302.6 | 2,587.2 | 2,586.2 | L     | 545.3   |         | 528.3   | 527.3   | 4  |
| 21 | 2,732.3 | 1,366.7 | 2,715.3 | 2,714.3 | Q     | 432.2   |         | 415.2   | 414.2   | 3  |
| 22 | 2,861.3 | 1,431.2 | 2,844.3 | 2,843.3 | E     | 304.2   |         | 287.1   | 286.2   | 2  |
| 23 | 3,035.5 | 1,518.2 | 3,018.4 | 3,017.4 | R     | 175.1   |         | 158.1   |         | 1  |

# CLK4\_HUMAN: VVDFGSATYDDEHHSTLVpSTR

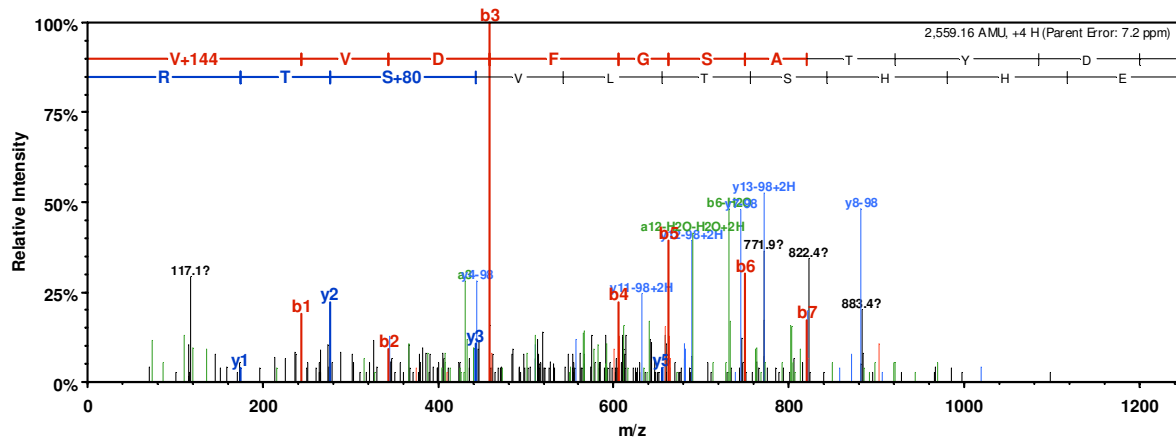

| B  | B Ions  | B+2H    | B-NH3   | B-H2O   | AA    | Y Ions  | Y+2H    | Y-NH3   | Y-H2O   | Y  |
|----|---------|---------|---------|---------|-------|---------|---------|---------|---------|----|
| 1  | 244.2   |         |         |         | V+144 | 2,560.1 | 1,280.6 | 2,543.1 | 2,542.1 | 21 |
| 2  | 343.2   |         |         |         | V     | 2,317.0 | 1,159.0 | 2,300.0 | 2,299.0 | 20 |
| 3  | 458.3   |         |         | 440.3   | D     | 2,217.9 | 1,109.5 | 2,200.9 | 2,199.9 | 19 |
| 4  | 605.3   |         |         | 587.3   | F     | 2,102.9 | 1,051.9 | 2,085.9 | 2,084.9 | 18 |
| 5  | 662.4   |         |         | 644.4   | G     | 1,955.8 | 978.4   | 1,938.8 | 1,937.8 | 17 |
| 6  | 749.4   | 375.2   |         | 731.4   | S     | 1,898.8 | 949.9   | 1,881.8 | 1,880.8 | 16 |
| 7  | 820.4   | 410.7   |         | 802.4   | A     | 1,811.8 | 906.4   | 1,794.7 | 1,793.7 | 15 |
| 8  | 921.5   | 461.2   |         | 903.5   | T     | 1,740.7 | 870.9   | 1,723.7 | 1,722.7 | 14 |
| 9  | 1,084.5 | 542.8   |         | 1,066.5 | Y     | 1,639.7 | 820.3   | 1,622.6 | 1,621.7 | 13 |
| 10 | 1,199.6 | 600.3   |         | 1,181.6 | D     | 1,476.6 | 738.8   | 1,459.6 | 1,458.6 | 12 |
| 11 | 1,314.6 | 657.8   |         | 1,296.6 | D     | 1,361.6 | 681.3   | 1,344.6 | 1,343.6 | 11 |
| 12 | 1,443.6 | 722.3   |         | 1,425.6 | E     | 1,246.6 | 623.8   | 1,229.5 | 1,228.5 | 10 |
| 13 | 1,580.7 | 790.9   |         | 1,562.7 | H     | 1,117.5 | 559.3   | 1,100.5 | 1,099.5 | 9  |
| 14 | 1,717.8 | 859.4   |         | 1,699.7 | H     | 980.5   | 490.7   | 963.4   | 962.4   | 8  |
| 15 | 1,804.8 | 902.9   |         | 1,786.8 | S     | 843.4   | 422.2   | 826.4   | 825.4   | 7  |
| 16 | 1,905.8 | 953.4   |         | 1,887.8 | T     | 756.4   | 378.7   | 739.3   | 738.4   | 6  |
| 17 | 2,018.9 | 1,010.0 |         | 2,000.9 | L     | 655.3   |         | 638.3   | 637.3   | 5  |
| 18 | 2,118.0 | 1,059.5 |         | 2,100.0 | V     | 542.2   |         | 525.2   | 524.2   | 4  |
| 19 | 2,285.0 | 1,143.0 |         | 2,267.0 | S+80  | 443.2   |         | 426.1   | 425.2   | 3  |
| 20 | 2,386.0 | 1,193.5 |         | 2,368.0 | T     | 276.2   |         | 259.1   | 258.2   | 2  |
| 21 | 2,560.1 | 1,280.6 | 2,543.1 | 2,542.1 | R     | 175.1   |         | 158.1   |         | 1  |

# CSK22\_HUMAN: VYAEVNP<sup>S</sup>SLR

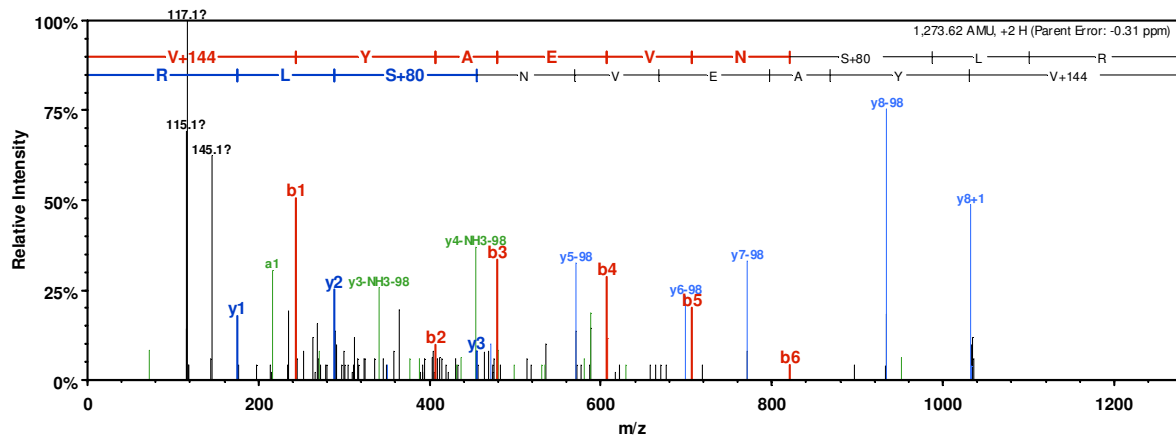

| B | B Ions  | B+2H  | B-NH3   | B-H2O   | AA    | Y Ions  | Y+2H  | Y-NH3   | Y-H2O   | Y |
|---|---------|-------|---------|---------|-------|---------|-------|---------|---------|---|
| 1 | 244.2   |       |         |         | V+144 | 1,274.6 | 637.8 | 1,257.6 | 1,256.6 | 9 |
| 2 | 407.2   |       |         |         | Y     | 1,031.5 | 516.2 | 1,014.4 | 1,013.4 | 8 |
| 3 | 478.3   |       |         |         | A     | 868.4   | 434.7 | 851.4   | 850.4   | 7 |
| 4 | 607.3   |       |         | 589.3   | E     | 797.4   | 399.2 | 780.3   | 779.3   | 6 |
| 5 | 706.4   |       |         | 688.4   | V     | 668.3   |       | 651.3   | 650.3   | 5 |
| 6 | 820.4   | 410.7 | 803.4   | 802.4   | N     | 569.2   |       | 552.2   | 551.2   | 4 |
| 7 | 987.4   | 494.2 | 970.4   | 969.4   | S+80  | 455.2   |       | 438.2   | 437.2   | 3 |
| 8 | 1,100.5 | 550.8 | 1,083.5 | 1,082.5 | L     | 288.2   |       | 271.2   |         | 2 |
| 9 | 1,274.6 | 637.8 | 1,257.6 | 1,256.6 | R     | 175.1   |       | 158.1   |         | 1 |

# FAK1\_HUMAN: LQPQEIPSPPTANLDR

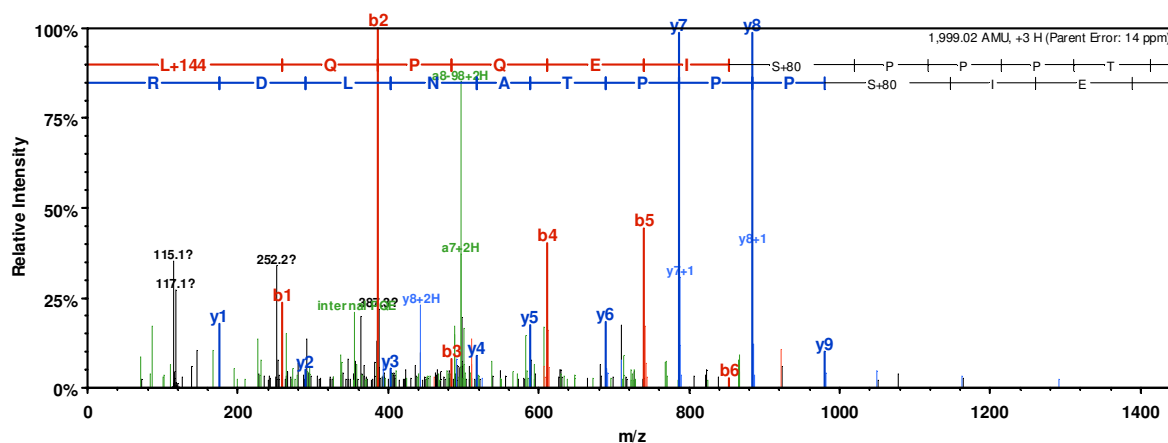

| B  | B Ions  | B+2H    | B-NH3   | B-H2O   | AA    | Y Ions  | Y+2H    | Y-NH3   | Y-H2O   | Y  |
|----|---------|---------|---------|---------|-------|---------|---------|---------|---------|----|
| 1  | 258.2   |         |         |         | L+144 | 2,000.0 | 1,000.5 | 1,983.0 | 1,982.0 | 16 |
| 2  | 386.3   |         | 369.2   |         | Q     | 1,742.8 | 871.9   | 1,725.8 | 1,724.8 | 15 |
| 3  | 483.3   |         | 466.3   |         | P     | 1,614.8 | 807.9   | 1,597.7 | 1,596.7 | 14 |
| 4  | 611.4   |         | 594.3   |         | Q     | 1,517.7 | 759.4   | 1,500.7 | 1,499.7 | 13 |
| 5  | 740.4   |         | 723.4   | 722.4   | E     | 1,389.6 | 695.3   | 1,372.6 | 1,371.6 | 12 |
| 6  | 853.5   | 427.2   | 836.5   | 835.5   | I     | 1,260.6 | 630.8   | 1,243.6 | 1,242.6 | 11 |
| 7  | 1,020.5 | 510.7   | 1,003.5 | 1,002.5 | S+80  | 1,147.5 | 574.3   | 1,130.5 | 1,129.5 | 10 |
| 8  | 1,117.5 | 559.3   | 1,100.5 | 1,099.5 | P     | 980.5   | 490.8   | 963.5   | 962.5   | 9  |
| 9  | 1,214.6 | 607.8   | 1,197.6 | 1,196.6 | P     | 883.5   | 442.2   | 866.4   | 865.5   | 8  |
| 10 | 1,311.6 | 656.3   | 1,294.6 | 1,293.6 | P     | 786.4   | 393.7   | 769.4   | 768.4   | 7  |
| 11 | 1,412.7 | 706.9   | 1,395.7 | 1,394.7 | T     | 689.4   | 345.2   | 672.3   | 671.3   | 6  |
| 12 | 1,483.7 | 742.4   | 1,466.7 | 1,465.7 | A     | 588.3   |         | 571.3   | 570.3   | 5  |
| 13 | 1,597.8 | 799.4   | 1,580.7 | 1,579.8 | N     | 517.3   |         | 500.2   | 499.3   | 4  |
| 14 | 1,710.9 | 855.9   | 1,693.8 | 1,692.8 | L     | 403.2   |         | 386.2   | 385.2   | 3  |
| 15 | 1,825.9 | 913.4   | 1,808.9 | 1,807.9 | D     | 290.1   |         | 273.1   | 272.1   | 2  |
| 16 | 2,000.0 | 1,000.5 | 1,983.0 | 1,982.0 | R     | 175.1   |         | 158.1   |         | 1  |

# FAK1\_HUMAN: QATVSWDSGGSDAPPKPSRPGYPpSPR

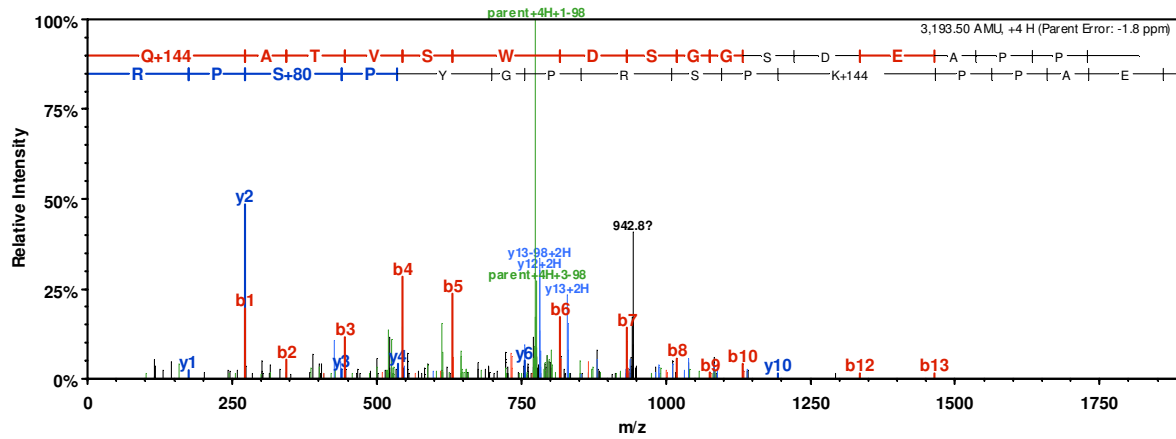

| B  | B Ions  | B+2H    | B-NH3   | B-H2O   | AA    | Y Ions  | Y+2H    | Y-NH3   | Y-H2O   | Y  |
|----|---------|---------|---------|---------|-------|---------|---------|---------|---------|----|
| 1  | 273.2   |         | 256.1   |         | Q+144 | 3,194.5 | 1,597.8 | 3,177.5 | 3,176.5 | 27 |
| 2  | 344.2   |         | 327.2   |         | A     | 2,922.4 | 1,461.7 | 2,905.3 | 2,904.3 | 26 |
| 3  | 445.3   |         | 428.2   | 427.2   | T     | 2,851.3 | 1,426.2 | 2,834.3 | 2,833.3 | 25 |
| 4  | 544.3   |         | 527.3   | 526.3   | V     | 2,750.3 | 1,375.6 | 2,733.2 | 2,732.3 | 24 |
| 5  | 631.4   |         | 614.3   | 613.3   | S     | 2,651.2 | 1,326.1 | 2,634.2 | 2,633.2 | 23 |
| 6  | 817.4   | 409.2   | 800.4   | 799.4   | W     | 2,564.2 | 1,282.6 | 2,547.1 | 2,546.2 | 22 |
| 7  | 932.5   | 466.7   | 915.4   | 914.4   | D     | 2,378.1 | 1,189.5 | 2,361.1 | 2,360.1 | 21 |
| 8  | 1,019.5 | 510.2   | 1,002.5 | 1,001.5 | S     | 2,263.1 | 1,132.0 | 2,246.0 | 2,245.1 | 20 |
| 9  | 1,076.5 | 538.8   | 1,059.5 | 1,058.5 | G     | 2,176.0 | 1,088.5 | 2,159.0 | 2,158.0 | 19 |
| 10 | 1,133.5 | 567.3   | 1,116.5 | 1,115.5 | G     | 2,119.0 | 1,060.0 | 2,102.0 | 2,101.0 | 18 |
| 11 | 1,220.6 | 610.8   | 1,203.5 | 1,202.6 | S     | 2,062.0 | 1,031.5 | 2,045.0 | 2,044.0 | 17 |
| 12 | 1,335.6 | 668.3   | 1,318.6 | 1,317.6 | D     | 1,975.0 | 988.0   | 1,957.9 | 1,956.9 | 16 |
| 13 | 1,464.6 | 732.8   | 1,447.6 | 1,446.6 | E     | 1,859.9 | 930.5   | 1,842.9 | 1,841.9 | 15 |
| 14 | 1,535.7 | 768.3   | 1,518.6 | 1,517.7 | A     | 1,730.9 | 865.9   | 1,713.9 | 1,712.9 | 14 |
| 15 | 1,632.7 | 816.9   | 1,615.7 | 1,614.7 | P     | 1,659.8 | 830.4   | 1,642.8 | 1,641.8 | 13 |
| 16 | 1,729.8 | 865.4   | 1,712.8 | 1,711.8 | P     | 1,562.8 | 781.9   | 1,545.8 | 1,544.8 | 12 |
| 17 | 2,002.0 | 1,001.5 | 1,984.9 | 1,984.0 | K+144 | 1,465.7 | 733.4   | 1,448.7 | 1,447.7 | 11 |
| 18 | 2,099.0 | 1,050.0 | 2,082.0 | 2,081.0 | P     | 1,193.5 | 597.3   | 1,176.5 | 1,175.5 | 10 |
| 19 | 2,186.1 | 1,093.5 | 2,169.0 | 2,168.1 | S     | 1,096.5 | 548.8   | 1,079.5 | 1,078.5 | 9  |
| 20 | 2,342.2 | 1,171.6 | 2,325.1 | 2,324.2 | R     | 1,009.5 | 505.2   | 992.4   | 991.5   | 8  |
| 21 | 2,439.2 | 1,220.1 | 2,422.2 | 2,421.2 | P     | 853.4   | 427.2   | 836.3   | 835.4   | 7  |
| 22 | 2,496.2 | 1,248.6 | 2,479.2 | 2,478.2 | G     | 756.3   | 378.7   | 739.3   | 738.3   | 6  |
| 23 | 2,659.3 | 1,330.2 | 2,642.3 | 2,641.3 | Y     | 699.3   |         | 682.3   | 681.3   | 5  |
| 24 | 2,756.4 | 1,378.7 | 2,739.3 | 2,738.3 | P     | 536.2   |         | 519.2   | 518.2   | 4  |
| 25 | 2,923.4 | 1,462.2 | 2,906.3 | 2,905.3 | S+80  | 439.2   |         | 422.1   | 421.2   | 3  |
| 26 | 3,020.4 | 1,510.7 | 3,003.4 | 3,002.4 | P     | 272.2   |         | 255.1   |         | 2  |
| 27 | 3,194.5 | 1,597.8 | 3,177.5 | 3,176.5 | R     | 175.1   |         | 158.1   |         | 1  |



# FAK1\_HUMAN: YMEDSTpYYK

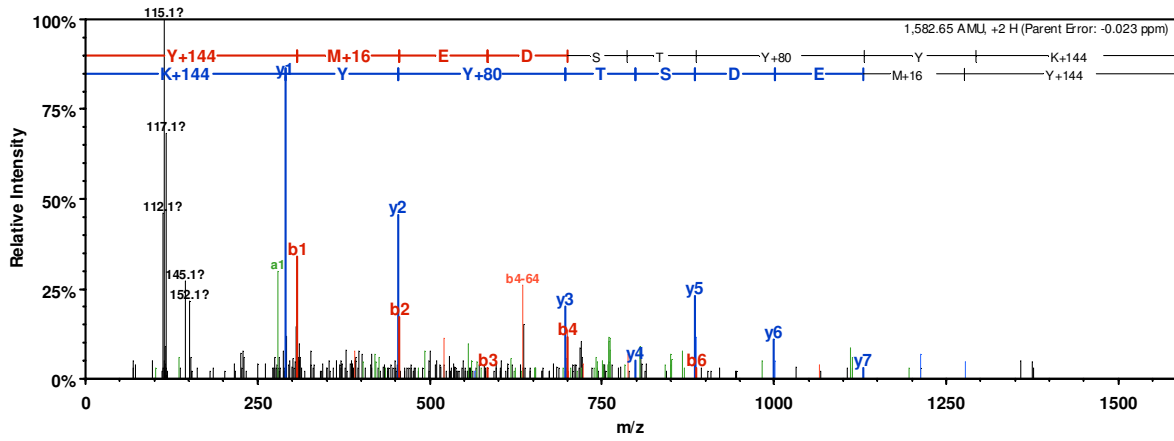

| B | B Ions  | B+2H  | B-NH3   | B-H2O   | AA    | Y Ions  | Y+2H  | Y-NH3   | Y-H2O   | Y |
|---|---------|-------|---------|---------|-------|---------|-------|---------|---------|---|
| 1 | 308.2   |       |         |         | Y+144 | 1,583.7 | 792.3 | 1,566.6 | 1,565.6 | 9 |
| 2 | 455.2   |       |         |         | M+16  | 1,276.5 | 638.8 | 1,259.5 | 1,258.5 | 8 |
| 3 | 584.3   |       |         | 566.2   | E     | 1,129.5 | 565.2 | 1,112.4 | 1,111.4 | 7 |
| 4 | 699.3   |       |         | 681.3   | D     | 1,000.4 | 500.7 | 983.4   | 982.4   | 6 |
| 5 | 786.3   |       |         | 768.3   | S     | 885.4   |       | 868.4   | 867.4   | 5 |
| 6 | 887.4   | 444.2 |         | 869.3   | T     | 798.4   |       | 781.3   | 780.3   | 4 |
| 7 | 1,130.4 | 565.7 |         | 1,112.4 | Y+80  | 697.3   |       | 680.3   |         | 3 |
| 8 | 1,293.5 | 647.2 |         | 1,275.4 | Y     | 454.3   |       | 437.3   |         | 2 |
| 9 | 1,583.7 | 792.3 | 1,566.6 | 1,565.6 | K+144 | 291.2   |       | 274.2   |         | 1 |

# FYN\_HUMAN: DGpSLNQSSGYR

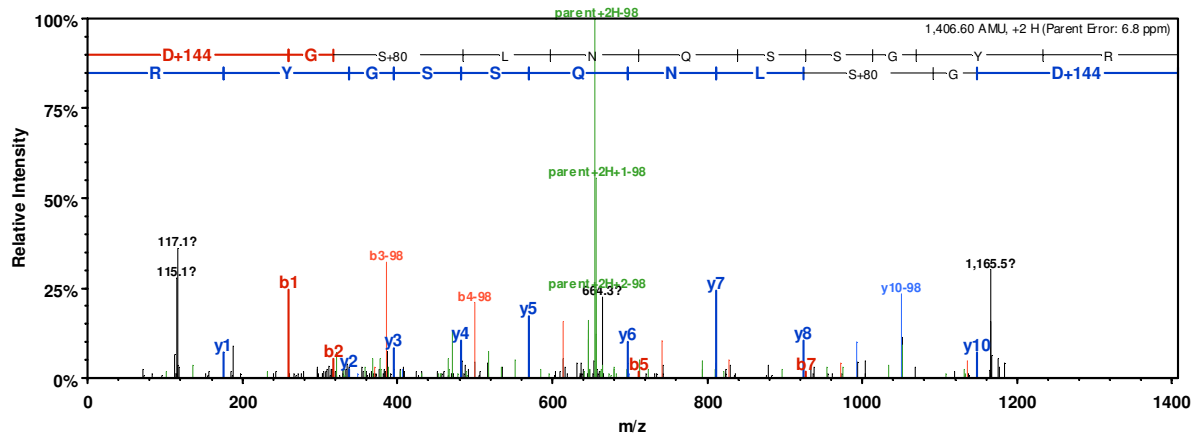

| B  | B Ions  | B+2H  | B-NH3   | B-H2O   | AA    | Y Ions  | Y+2H  | Y-NH3   | Y-H2O   | Y  |
|----|---------|-------|---------|---------|-------|---------|-------|---------|---------|----|
| 1  | 260.1   |       |         | 242.1   | D+144 | 1,407.6 | 704.3 | 1,390.6 | 1,389.6 | 11 |
| 2  | 317.2   |       |         | 299.1   | G     | 1,148.5 | 574.7 | 1,131.4 | 1,130.5 | 10 |
| 3  | 484.2   |       |         | 466.1   | S+80  | 1,091.5 | 546.2 | 1,074.4 | 1,073.4 | 9  |
| 4  | 597.2   |       |         | 579.2   | L     | 924.5   | 462.7 | 907.4   | 906.4   | 8  |
| 5  | 711.3   |       | 694.3   | 693.3   | N     | 811.4   | 406.2 | 794.3   | 793.4   | 7  |
| 6  | 839.3   | 420.2 | 822.3   | 821.3   | Q     | 697.3   | 349.2 | 680.3   | 679.3   | 6  |
| 7  | 926.4   | 463.7 | 909.3   | 908.4   | S     | 569.3   |       | 552.2   | 551.3   | 5  |
| 8  | 1,013.4 | 507.2 | 996.4   | 995.4   | S     | 482.2   |       | 465.2   | 464.2   | 4  |
| 9  | 1,070.4 | 535.7 | 1,053.4 | 1,052.4 | G     | 395.2   |       | 378.2   |         | 3  |
| 10 | 1,233.5 | 617.2 | 1,216.5 | 1,215.5 | Y     | 338.2   |       | 321.2   |         | 2  |
| 11 | 1,407.6 | 704.3 | 1,390.6 | 1,389.6 | R     | 175.1   |       | 158.1   |         | 1  |

# FYN\_HUMAN: LIEDNEYpTAR

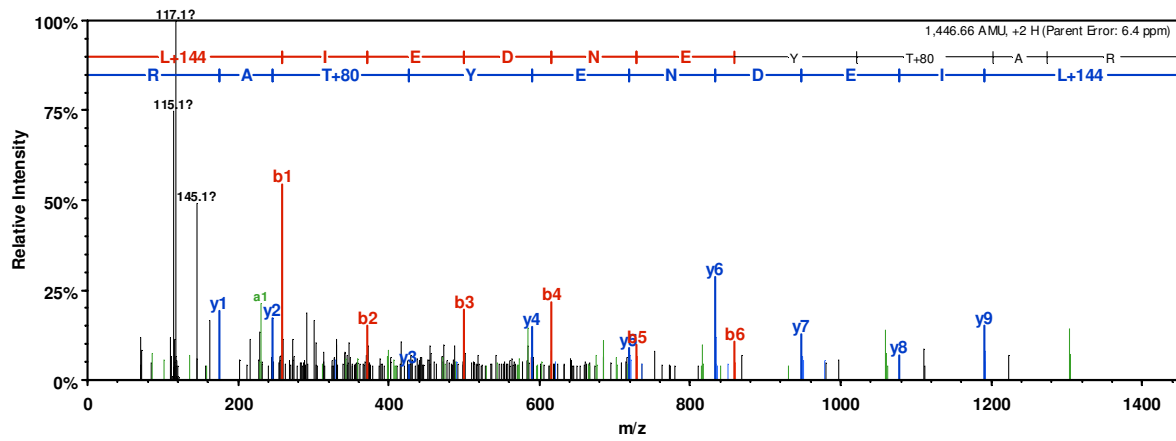

| B  | B Ions  | B+2H  | B-NH3   | B-H2O   | AA    | Y Ions  | Y+2H  | Y-NH3   | Y-H2O   | Y  |
|----|---------|-------|---------|---------|-------|---------|-------|---------|---------|----|
| 1  | 258.2   |       |         |         | L+144 | 1,447.7 | 724.3 | 1,430.6 | 1,429.6 | 10 |
| 2  | 371.3   |       |         |         | I     | 1,190.5 | 595.7 | 1,173.4 | 1,172.5 | 9  |
| 3  | 500.3   |       |         | 482.3   | E     | 1,077.4 | 539.2 | 1,060.4 | 1,059.4 | 8  |
| 4  | 615.3   |       |         | 597.3   | D     | 948.3   | 474.7 | 931.3   | 930.3   | 7  |
| 5  | 729.4   |       | 712.4   | 711.4   | N     | 833.3   | 417.2 | 816.3   | 815.3   | 6  |
| 6  | 858.4   | 429.7 | 841.4   | 840.4   | E     | 719.3   |       | 702.2   | 701.3   | 5  |
| 7  | 1,021.5 | 511.3 | 1,004.5 | 1,003.5 | Y     | 590.2   |       | 573.2   | 572.2   | 4  |
| 8  | 1,202.5 | 601.8 | 1,185.5 | 1,184.5 | T+80  | 427.2   |       | 410.1   | 409.2   | 3  |
| 9  | 1,273.5 | 637.3 | 1,256.5 | 1,255.5 | A     | 246.2   |       | 229.1   |         | 2  |
| 10 | 1,447.7 | 724.3 | 1,430.6 | 1,429.6 | R     | 175.1   |       | 158.1   |         | 1  |

# GSK3A\_HUMAN: TSSFAEPGGGGGGGGPGGASGPGGpTGGGK

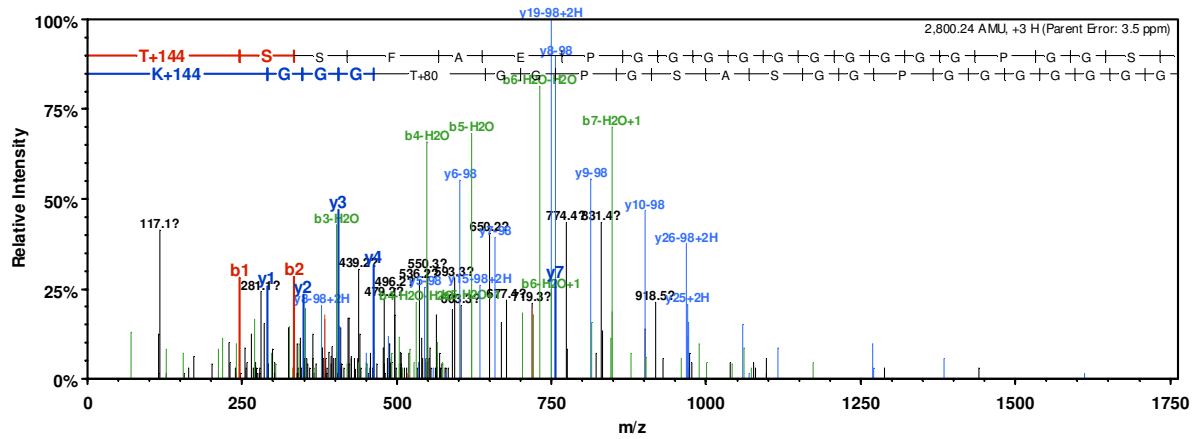

| B  | B Ions | B+2H   | B-NH3  | B-H2O  | AA    | Y Ions | Y+2H   | Y-NH3  | Y-H2O  | Y  |
|----|--------|--------|--------|--------|-------|--------|--------|--------|--------|----|
| 1  | 246.2  |        |        | 228.1  | T+144 | 2801.2 | 1401.1 | 2784.2 | 2783.2 | 32 |
| 2  | 333.2  |        |        | 315.2  | S     | 2556.1 | 1278.5 | 2539.1 | 2538.1 | 31 |
| 3  | 420.2  |        |        | 402.2  | S     | 2469.1 | 1235.0 | 2452.0 | 2451.0 | 30 |
| 4  | 567.3  |        |        | 549.3  | F     | 2382.0 | 1191.5 | 2365.0 | 2364.0 | 29 |
| 5  | 638.3  |        |        | 620.3  | A     | 2235.0 | 1118.0 | 2217.9 | 2216.9 | 28 |
| 6  | 767.4  | 384.2  |        | 749.4  | E     | 2163.9 | 1082.5 | 2146.9 | 2145.9 | 27 |
| 7  | 864.4  | 432.7  |        | 846.4  | P     | 2034.9 | 1017.9 | 2017.8 | 2016.9 | 26 |
| 8  | 921.4  | 461.2  |        | 903.4  | G     | 1937.8 | 969.4  | 1920.8 | 1919.8 | 25 |
| 9  | 978.5  | 489.7  |        | 960.5  | G     | 1880.8 | 940.9  | 1863.8 | 1862.8 | 24 |
| 10 | 1035.5 | 518.2  |        | 1017.5 | G     | 1823.8 | 912.4  | 1806.8 | 1805.8 | 23 |
| 11 | 1092.5 | 546.8  |        | 1074.5 | G     | 1766.8 | 883.9  | 1749.7 | 1748.7 | 22 |
| 12 | 1149.5 | 575.3  |        | 1131.5 | G     | 1709.7 | 855.4  | 1692.7 | 1691.7 | 21 |
| 13 | 1206.6 | 603.8  |        | 1188.5 | G     | 1652.7 | 826.9  | 1635.7 | 1634.7 | 20 |
| 14 | 1263.6 | 632.3  |        | 1245.6 | G     | 1595.7 | 798.4  | 1578.7 | 1577.7 | 19 |
| 15 | 1320.6 | 660.8  |        | 1302.6 | G     | 1538.7 | 769.8  | 1521.6 | 1520.6 | 18 |
| 16 | 1377.6 | 689.3  |        | 1359.6 | G     | 1481.7 | 741.3  | 1464.6 | 1463.6 | 17 |
| 17 | 1434.6 | 717.8  |        | 1416.6 | G     | 1424.6 | 712.8  | 1407.6 | 1406.6 | 16 |
| 18 | 1531.7 | 766.3  |        | 1513.7 | P     | 1367.6 | 684.3  | 1350.6 | 1349.6 | 15 |
| 19 | 1588.7 | 794.9  |        | 1570.7 | G     | 1270.6 | 635.8  | 1253.5 | 1252.5 | 14 |
| 20 | 1645.7 | 823.4  |        | 1627.7 | G     | 1213.5 | 607.3  | 1196.5 | 1195.5 | 13 |
| 21 | 1732.8 | 866.9  |        | 1714.8 | S     | 1156.5 | 578.8  | 1139.5 | 1138.5 | 12 |
| 22 | 1803.8 | 902.4  |        | 1785.8 | A     | 1069.5 | 535.2  | 1052.5 | 1051.5 | 11 |
| 23 | 1890.8 | 945.9  |        | 1872.8 | S     | 998.4  | 499.7  | 981.4  | 980.4  | 10 |
| 24 | 1947.9 | 974.4  |        | 1929.8 | G     | 911.4  | 456.2  | 894.4  | 893.4  | 9  |
| 25 | 2044.9 | 1023.0 |        | 2026.9 | P     | 854.4  | 427.7  | 837.4  | 836.4  | 8  |
| 26 | 2101.9 | 1051.5 |        | 2083.9 | G     | 757.3  | 379.2  | 740.3  | 739.3  | 7  |
| 27 | 2159.0 | 1080.0 |        | 2140.9 | G     | 700.3  | 350.7  | 683.3  | 682.3  | 6  |
| 28 | 2340.0 | 1170.5 |        | 2322.0 | T+80  | 643.3  |        | 626.3  | 625.3  | 5  |
| 29 | 2397.0 | 1199.0 |        | 2379.0 | G     | 462.3  |        | 445.3  |        | 4  |
| 30 | 2454.0 | 1227.5 |        | 2436.0 | G     | 405.3  |        | 388.2  |        | 3  |
| 31 | 2511.0 | 1256.0 |        | 2493.0 | G     | 348.2  |        | 331.2  |        | 2  |
| 32 | 2801.2 | 1401.1 | 2784.2 | 2783.2 | K+144 | 291.2  |        | 274.2  |        | 1  |

# GSK3B\_HUMAN: GEPNVpSYICSR

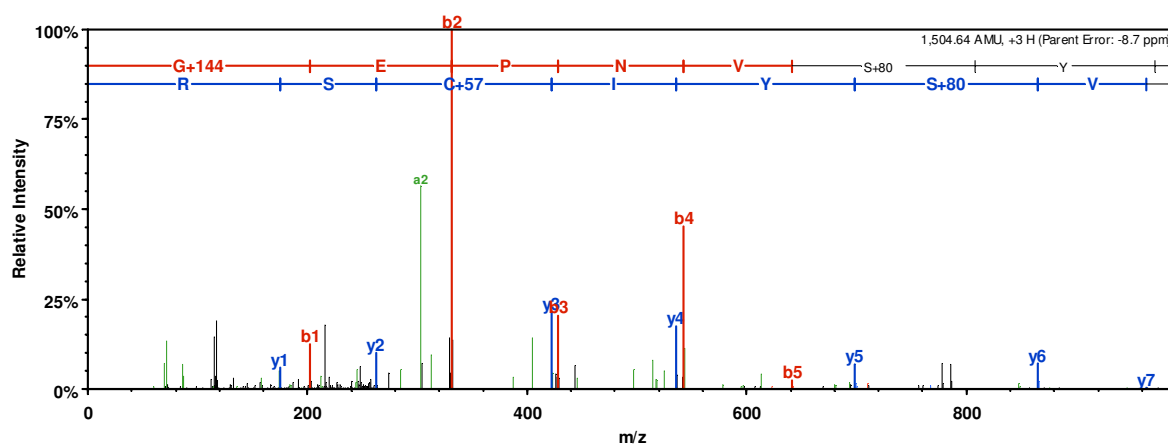

| B  | B Ions  | B+2H  | B-NH3   | B-H2O   | AA    | Y Ions  | Y+2H  | Y-NH3   | Y-H2O   | Y  |
|----|---------|-------|---------|---------|-------|---------|-------|---------|---------|----|
| 1  | 202.1   |       |         |         | G+144 | 1,505.7 | 753.3 | 1,488.6 | 1,487.6 | 11 |
| 2  | 331.2   |       |         | 313.2   | E     | 1,304.5 | 652.8 | 1,287.5 | 1,286.5 | 10 |
| 3  | 428.2   |       |         | 410.2   | P     | 1,175.5 | 588.2 | 1,158.5 | 1,157.5 | 9  |
| 4  | 542.3   |       | 525.2   | 524.3   | N     | 1,078.4 | 539.7 | 1,061.4 | 1,060.4 | 8  |
| 5  | 641.3   |       | 624.3   | 623.3   | V     | 964.4   | 482.7 | 947.4   | 946.4   | 7  |
| 6  | 808.3   | 404.7 | 791.3   | 790.3   | S+80  | 865.3   | 433.2 | 848.3   | 847.3   | 6  |
| 7  | 971.4   | 486.2 | 954.4   | 953.4   | Y     | 698.3   |       | 681.3   | 680.3   | 5  |
| 8  | 1,084.5 | 542.7 | 1,067.5 | 1,066.5 | I     | 535.3   |       | 518.2   | 517.3   | 4  |
| 9  | 1,244.5 | 622.8 | 1,227.5 | 1,226.5 | C+57  | 422.2   |       | 405.2   | 404.2   | 3  |
| 10 | 1,331.5 | 666.3 | 1,314.5 | 1,313.5 | S     | 262.2   |       | 245.1   | 244.1   | 2  |
| 11 | 1,505.7 | 753.3 | 1,488.6 | 1,487.6 | R     | 175.1   |       | 158.1   |         | 1  |

# GSK3B\_HUMAN: GEPNVSpYICSR

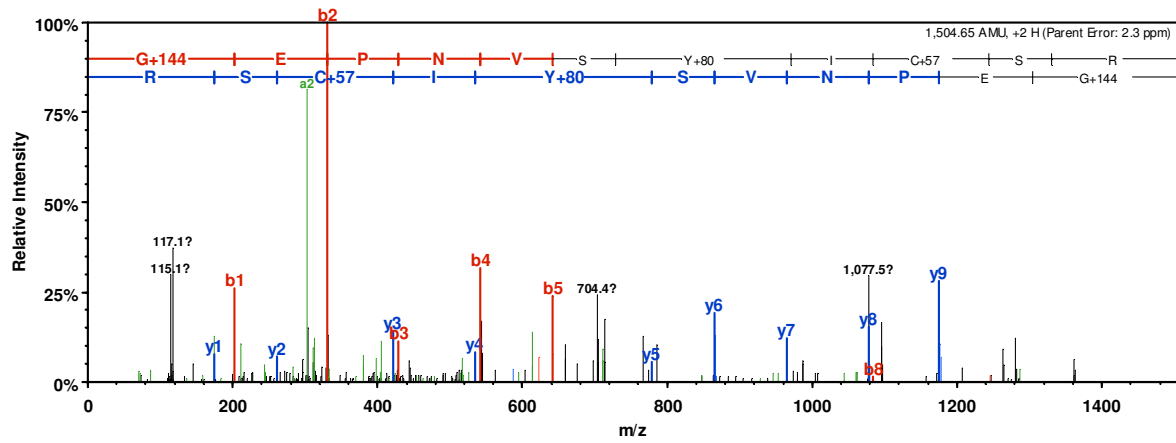

| B  | B Ions  | B+2H  | B-NH3   | B-H2O   | AA    | Y Ions  | Y+2H  | Y-NH3   | Y-H2O   | Y  |
|----|---------|-------|---------|---------|-------|---------|-------|---------|---------|----|
| 1  | 202.1   |       |         |         | G+144 | 1,505.7 | 753.3 | 1,488.6 | 1,487.6 | 11 |
| 2  | 331.2   |       |         | 313.2   | E     | 1,304.5 | 652.8 | 1,287.5 | 1,286.5 | 10 |
| 3  | 428.2   |       |         | 410.2   | P     | 1,175.5 | 588.2 | 1,158.5 | 1,157.5 | 9  |
| 4  | 542.3   |       | 525.2   | 524.3   | N     | 1,078.4 | 539.7 | 1,061.4 | 1,060.4 | 8  |
| 5  | 641.3   |       | 624.3   | 623.3   | V     | 964.4   | 482.7 | 947.4   | 946.4   | 7  |
| 6  | 728.4   | 364.7 | 711.3   | 710.4   | S     | 865.3   | 433.2 | 848.3   | 847.3   | 6  |
| 7  | 971.4   | 486.2 | 954.4   | 953.4   | Y+80  | 778.3   |       | 761.3   | 760.3   | 5  |
| 8  | 1,084.5 | 542.7 | 1,067.5 | 1,066.5 | I     | 535.3   |       | 518.2   | 517.3   | 4  |
| 9  | 1,244.5 | 622.8 | 1,227.5 | 1,226.5 | C+57  | 422.2   |       | 405.2   | 404.2   | 3  |
| 10 | 1,331.5 | 666.3 | 1,314.5 | 1,313.5 | S     | 262.2   |       | 245.1   | 244.1   | 2  |
| 11 | 1,505.7 | 753.3 | 1,488.6 | 1,487.6 | R     | 175.1   |       | 158.1   |         | 1  |

# GSK3B\_HUMAN: GEPNVSYICpSR

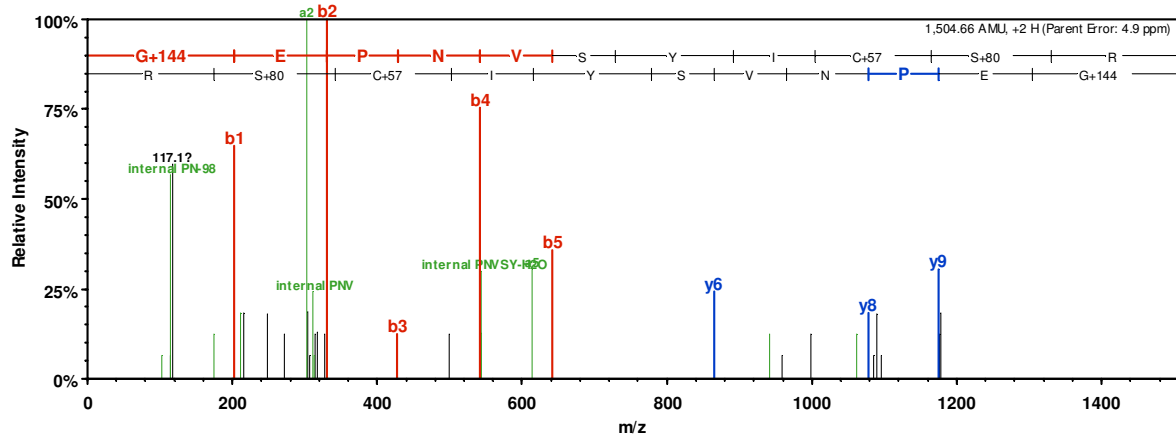

| B  | B Ions  | B+2H  | B-NH3   | B-H2O   | AA    | Y Ions  | Y+2H  | Y-NH3   | Y-H2O   | Y  |
|----|---------|-------|---------|---------|-------|---------|-------|---------|---------|----|
| 1  | 202.1   |       |         |         | G+144 | 1,505.7 | 753.3 | 1,488.6 | 1,487.6 | 11 |
| 2  | 331.2   |       |         | 313.2   | E     | 1,304.5 | 652.8 | 1,287.5 | 1,286.5 | 10 |
| 3  | 428.2   |       |         | 410.2   | P     | 1,175.5 | 588.2 | 1,158.5 | 1,157.5 | 9  |
| 4  | 542.3   |       | 525.2   | 524.3   | N     | 1,078.4 | 539.7 | 1,061.4 | 1,060.4 | 8  |
| 5  | 641.3   |       | 624.3   | 623.3   | V     | 964.4   | 482.7 | 947.4   | 946.4   | 7  |
| 6  | 728.4   | 364.7 | 711.3   | 710.4   | S     | 865.3   | 433.2 | 848.3   | 847.3   | 6  |
| 7  | 891.4   | 446.2 | 874.4   | 873.4   | Y     | 778.3   |       | 761.3   | 760.3   | 5  |
| 8  | 1,004.5 | 502.8 | 987.5   | 986.5   | I     | 615.2   |       | 598.2   | 597.2   | 4  |
| 9  | 1,164.5 | 582.8 | 1,147.5 | 1,146.5 | C+57  | 502.1   |       | 485.1   | 484.1   | 3  |
| 10 | 1,331.5 | 666.3 | 1,314.5 | 1,313.5 | S+80  | 342.1   |       | 325.1   | 324.1   | 2  |
| 11 | 1,505.7 | 753.3 | 1,488.6 | 1,487.6 | R     | 175.1   |       | 158.1   |         | 1  |

# GSK3B\_HUMAN: IQAAASpTPTNATAASDANTGDR

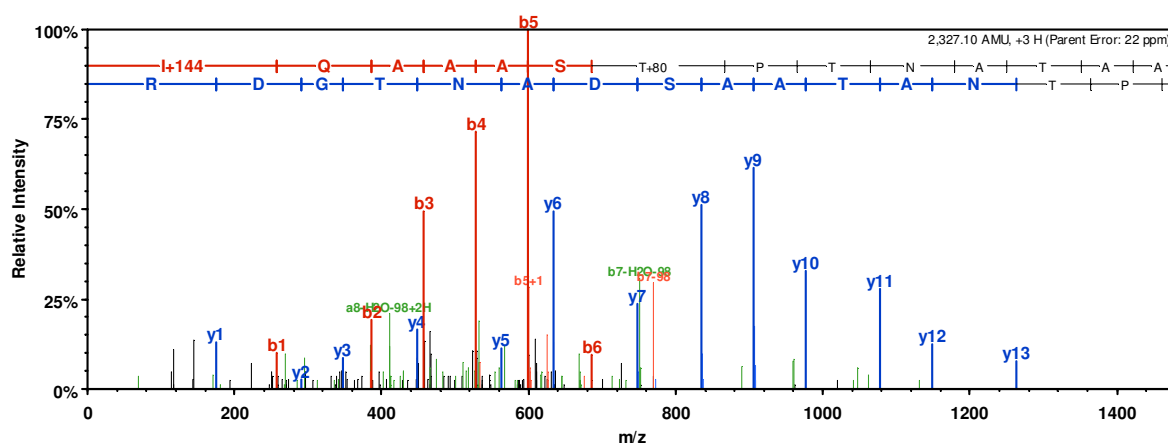

| B  | B Ions  | B+2H    | B-NH3   | B-H2O   | AA    | Y Ions  | Y+2H    | Y-NH3   | Y-H2O   | Y  |
|----|---------|---------|---------|---------|-------|---------|---------|---------|---------|----|
| 1  | 258.2   |         |         |         | I+144 | 2,328.1 | 1,164.5 | 2,311.0 | 2,310.0 | 22 |
| 2  | 386.3   |         | 369.2   |         | Q     | 2,070.9 | 1,035.9 | 2,053.8 | 2,052.9 | 21 |
| 3  | 457.3   |         | 440.3   |         | A     | 1,942.8 | 971.9   | 1,925.8 | 1,924.8 | 20 |
| 4  | 528.3   |         | 511.3   |         | A     | 1,871.8 | 936.4   | 1,854.8 | 1,853.8 | 19 |
| 5  | 599.4   |         | 582.3   |         | A     | 1,800.7 | 900.9   | 1,783.7 | 1,782.7 | 18 |
| 6  | 686.4   | 343.7   | 669.4   | 668.4   | S     | 1,729.7 | 865.4   | 1,712.7 | 1,711.7 | 17 |
| 7  | 867.4   | 434.2   | 850.4   | 849.4   | T+80  | 1,642.7 | 821.8   | 1,625.6 | 1,624.7 | 16 |
| 8  | 964.5   | 482.7   | 947.4   | 946.5   | P     | 1,461.7 | 731.3   | 1,444.6 | 1,443.6 | 15 |
| 9  | 1,065.5 | 533.3   | 1,048.5 | 1,047.5 | T     | 1,364.6 | 682.8   | 1,347.6 | 1,346.6 | 14 |
| 10 | 1,179.6 | 590.3   | 1,162.5 | 1,161.5 | N     | 1,263.6 | 632.3   | 1,246.5 | 1,245.5 | 13 |
| 11 | 1,250.6 | 625.8   | 1,233.6 | 1,232.6 | A     | 1,149.5 | 575.3   | 1,132.5 | 1,131.5 | 12 |
| 12 | 1,351.6 | 676.3   | 1,334.6 | 1,333.6 | T     | 1,078.5 | 539.7   | 1,061.4 | 1,060.5 | 11 |
| 13 | 1,422.7 | 711.8   | 1,405.6 | 1,404.7 | A     | 977.4   | 489.2   | 960.4   | 959.4   | 10 |
| 14 | 1,493.7 | 747.4   | 1,476.7 | 1,475.7 | A     | 906.4   | 453.7   | 889.4   | 888.4   | 9  |
| 15 | 1,580.7 | 790.9   | 1,563.7 | 1,562.7 | S     | 835.4   | 418.2   | 818.3   | 817.3   | 8  |
| 16 | 1,695.8 | 848.4   | 1,678.7 | 1,677.8 | D     | 748.3   | 374.7   | 731.3   | 730.3   | 7  |
| 17 | 1,766.8 | 883.9   | 1,749.8 | 1,748.8 | A     | 633.3   | 317.2   | 616.3   | 615.3   | 6  |
| 18 | 1,880.9 | 940.9   | 1,863.8 | 1,862.8 | N     | 562.3   |         | 545.2   | 544.2   | 5  |
| 19 | 1,981.9 | 991.5   | 1,964.9 | 1,963.9 | T     | 448.2   |         | 431.2   | 430.2   | 4  |
| 20 | 2,038.9 | 1,020.0 | 2,021.9 | 2,020.9 | G     | 347.2   |         | 330.1   | 329.2   | 3  |
| 21 | 2,153.9 | 1,077.5 | 2,136.9 | 2,135.9 | D     | 290.1   |         | 273.1   | 272.1   | 2  |
| 22 | 2,328.1 | 1,164.5 | 2,311.0 | 2,310.0 | R     | 175.1   |         | 158.1   |         | 1  |



# KC1D\_HUMAN: GAPVNIpSSSDLTGR

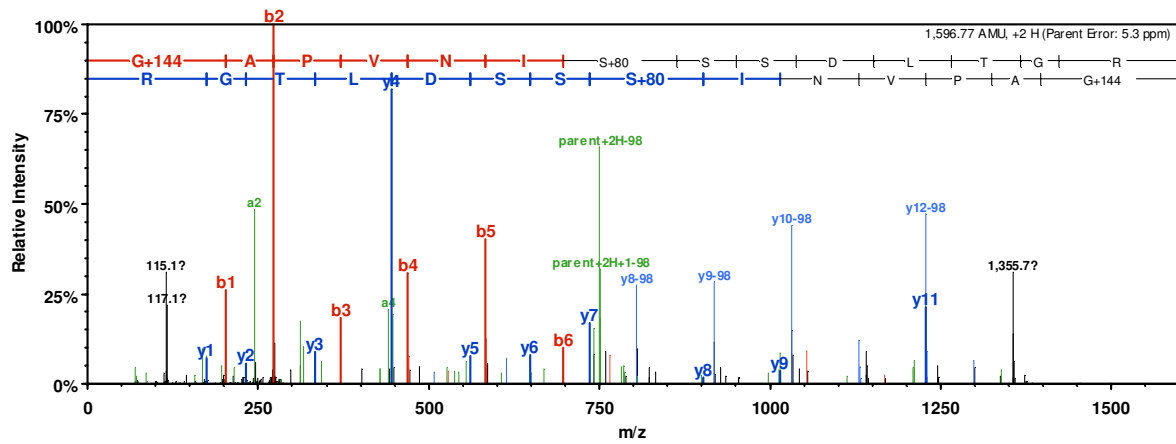

| B  | B Ions  | B+2H  | B-NH3   | B-H2O   | AA    | Y Ions  | Y+2H  | Y-NH3   | Y-H2O   | Y  |
|----|---------|-------|---------|---------|-------|---------|-------|---------|---------|----|
| 1  | 202.1   |       |         |         | G+144 | 1,597.8 | 799.4 | 1,580.7 | 1,579.8 | 14 |
| 2  | 273.2   |       |         |         | A     | 1,396.6 | 698.8 | 1,379.6 | 1,378.6 | 13 |
| 3  | 370.2   |       |         |         | P     | 1,325.6 | 663.3 | 1,308.6 | 1,307.6 | 12 |
| 4  | 469.3   |       |         |         | V     | 1,228.6 | 614.8 | 1,211.5 | 1,210.5 | 11 |
| 5  | 583.3   |       | 566.3   |         | N     | 1,129.5 | 565.2 | 1,112.5 | 1,111.5 | 10 |
| 6  | 696.4   | 348.7 | 679.4   |         | I     | 1,015.4 | 508.2 | 998.4   | 997.4   | 9  |
| 7  | 863.4   | 432.2 | 846.4   | 845.4   | S+80  | 902.4   | 451.7 | 885.3   | 884.4   | 8  |
| 8  | 950.4   | 475.7 | 933.4   | 932.4   | S     | 735.4   | 368.2 | 718.3   | 717.4   | 7  |
| 9  | 1,037.5 | 519.2 | 1,020.5 | 1,019.5 | S     | 648.3   | 324.7 | 631.3   | 630.3   | 6  |
| 10 | 1,152.5 | 576.8 | 1,135.5 | 1,134.5 | D     | 561.3   |       | 544.3   | 543.3   | 5  |
| 11 | 1,265.6 | 633.3 | 1,248.6 | 1,247.6 | L     | 446.3   |       | 429.2   | 428.3   | 4  |
| 12 | 1,366.6 | 683.8 | 1,349.6 | 1,348.6 | T     | 333.2   |       | 316.2   | 315.2   | 3  |
| 13 | 1,423.7 | 712.3 | 1,406.6 | 1,405.6 | G     | 232.1   |       | 215.1   |         | 2  |
| 14 | 1,597.8 | 799.4 | 1,580.7 | 1,579.8 | R     | 175.1   |       | 158.1   |         | 1  |

# KC1D\_HUMAN: GAPVNISSpSDLTGR

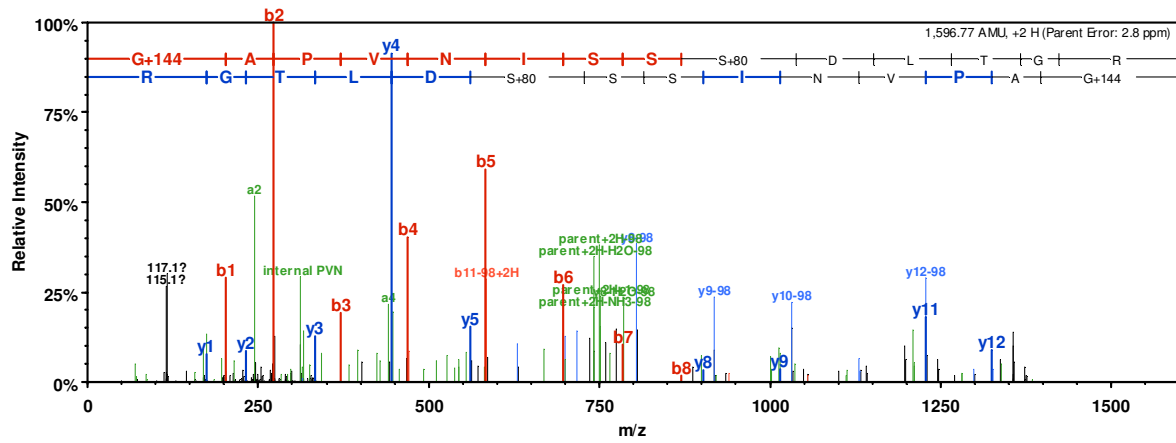

| B  | B Ions  | B+2H  | B-NH3   | B-H2O   | AA    | Y Ions  | Y+2H  | Y-NH3   | Y-H2O   | Y  |
|----|---------|-------|---------|---------|-------|---------|-------|---------|---------|----|
| 1  | 202.1   |       |         |         | G+144 | 1,597.8 | 799.4 | 1,580.7 | 1,579.8 | 14 |
| 2  | 273.2   |       |         |         | A     | 1,396.6 | 698.8 | 1,379.6 | 1,378.6 | 13 |
| 3  | 370.2   |       |         |         | P     | 1,325.6 | 663.3 | 1,308.6 | 1,307.6 | 12 |
| 4  | 469.3   |       |         |         | V     | 1,228.6 | 614.8 | 1,211.5 | 1,210.5 | 11 |
| 5  | 583.3   |       | 566.3   |         | N     | 1,129.5 | 565.2 | 1,112.5 | 1,111.5 | 10 |
| 6  | 696.4   | 348.7 | 679.4   |         | I     | 1,015.4 | 508.2 | 998.4   | 997.4   | 9  |
| 7  | 783.4   | 392.2 | 766.4   | 765.4   | S     | 902.4   | 451.7 | 885.3   | 884.4   | 8  |
| 8  | 870.5   | 435.7 | 853.5   | 852.5   | S     | 815.3   | 408.2 | 798.3   | 797.3   | 7  |
| 9  | 1,037.5 | 519.2 | 1,020.5 | 1,019.5 | S+80  | 728.3   | 364.7 | 711.3   | 710.3   | 6  |
| 10 | 1,152.5 | 576.8 | 1,135.5 | 1,134.5 | D     | 561.3   |       | 544.3   | 543.3   | 5  |
| 11 | 1,265.6 | 633.3 | 1,248.6 | 1,247.6 | L     | 446.3   |       | 429.2   | 428.3   | 4  |
| 12 | 1,366.6 | 683.8 | 1,349.6 | 1,348.6 | T     | 333.2   |       | 316.2   | 315.2   | 3  |
| 13 | 1,423.7 | 712.3 | 1,406.6 | 1,405.6 | G     | 232.1   |       | 215.1   |         | 2  |
| 14 | 1,597.8 | 799.4 | 1,580.7 | 1,579.8 | R     | 175.1   |       | 158.1   |         | 1  |

# KC1D\_HUMAN: GLPpSTApSGR

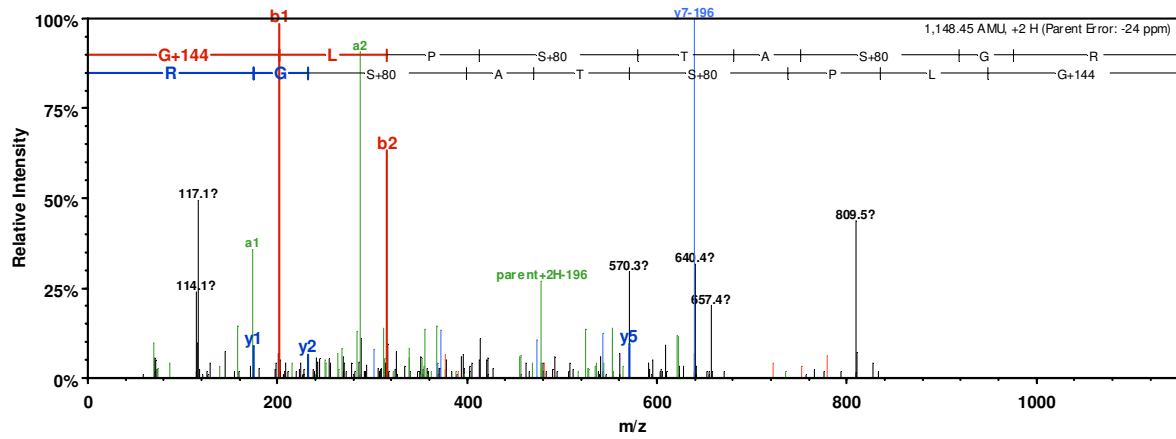

| B | B Ions  | B+2H  | B-NH3   | B-H2O   | AA    | Y Ions  | Y+2H  | Y-NH3   | Y-H2O   | Y |
|---|---------|-------|---------|---------|-------|---------|-------|---------|---------|---|
| 1 | 202.1   |       |         |         | G+144 | 1,149.5 | 575.2 | 1,132.5 | 1,131.5 | 9 |
| 2 | 315.2   |       |         |         | L     | 948.4   | 474.7 | 931.3   | 930.3   | 8 |
| 3 | 412.3   |       |         |         | P     | 835.3   | 418.1 | 818.2   | 817.3   | 7 |
| 4 | 579.3   |       |         | 561.3   | S+80  | 738.2   | 369.6 | 721.2   | 720.2   | 6 |
| 5 | 680.3   |       |         | 662.3   | T     | 571.2   |       | 554.2   | 553.2   | 5 |
| 6 | 751.4   | 376.2 |         | 733.3   | A     | 470.2   |       | 453.1   | 452.2   | 4 |
| 7 | 918.3   | 459.7 |         | 900.3   | S+80  | 399.1   |       | 382.1   | 381.1   | 3 |
| 8 | 975.4   | 488.2 |         | 957.4   | G     | 232.1   |       | 215.1   |         | 2 |
| 9 | 1,149.5 | 575.2 | 1,132.5 | 1,131.5 | R     | 175.1   |       | 158.1   |         | 1 |

# KC1D\_HUMAN: GLPpSTASGR

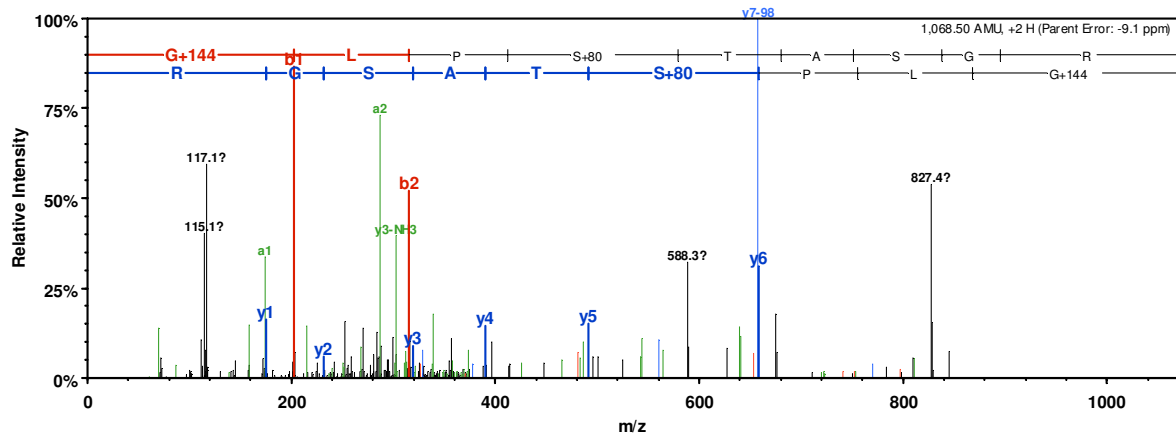

| B | B Ions  | B+2H  | B-NH3   | B-H2O   | AA    | Y Ions  | Y+2H  | Y-NH3   | Y-H2O   | Y |
|---|---------|-------|---------|---------|-------|---------|-------|---------|---------|---|
| 1 | 202.1   |       |         |         | G+144 | 1,069.5 | 535.3 | 1,052.5 | 1,051.5 | 9 |
| 2 | 315.2   |       |         |         | L     | 868.4   | 434.7 | 851.4   | 850.4   | 8 |
| 3 | 412.3   |       |         |         | P     | 755.3   | 378.2 | 738.3   | 737.3   | 7 |
| 4 | 579.3   |       |         | 561.3   | S+80  | 658.3   | 329.6 | 641.2   | 640.2   | 6 |
| 5 | 680.3   |       |         | 662.3   | T     | 491.3   |       | 474.2   | 473.2   | 5 |
| 6 | 751.4   | 376.2 |         | 733.3   | A     | 390.2   |       | 373.2   | 372.2   | 4 |
| 7 | 838.4   | 419.7 |         | 820.4   | S     | 319.2   |       | 302.1   | 301.2   | 3 |
| 8 | 895.4   | 448.2 |         | 877.4   | G     | 232.1   |       | 215.1   |         | 2 |
| 9 | 1,069.5 | 535.3 | 1,052.5 | 1,051.5 | R     | 175.1   |       | 158.1   |         | 1 |

# KC1D\_HUMAN: GLPSTApSGR

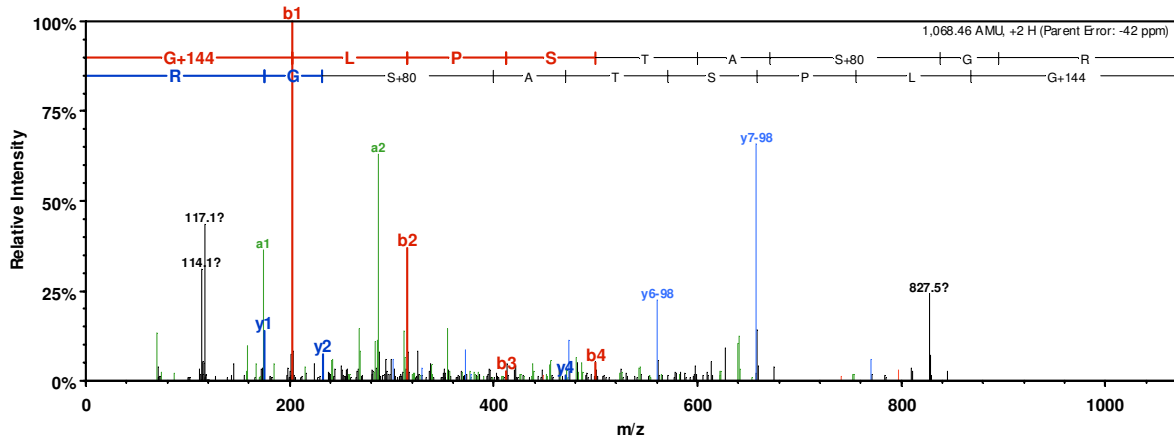

| B | B Ions | B+2H  | B-NH3  | B-H2O  | AA    | Y Ions | Y+2H  | Y-NH3  | Y-H2O  | Y |
|---|--------|-------|--------|--------|-------|--------|-------|--------|--------|---|
| 1 | 202.1  |       |        |        | G+144 | 1069.5 | 535.3 | 1052.5 | 1051.5 | 9 |
| 2 | 315.2  |       |        |        | L     | 868.4  | 434.7 | 851.4  | 850.4  | 8 |
| 3 | 412.3  |       |        |        | P     | 755.3  | 378.2 | 738.3  | 737.3  | 7 |
| 4 | 499.3  |       |        | 481.3  | S     | 658.3  | 329.6 | 641.2  | 640.2  | 6 |
| 5 | 600.3  |       |        | 582.3  | T     | 571.2  |       | 554.2  | 553.2  | 5 |
| 6 | 671.4  | 336.2 |        | 653.4  | A     | 470.2  |       | 453.1  | 452.2  | 4 |
| 7 | 838.4  | 419.7 |        | 820.4  | S+80  | 399.1  |       | 382.1  | 381.1  | 3 |
| 8 | 895.4  | 448.2 |        | 877.4  | G     | 232.1  |       | 215.1  |        | 2 |
| 9 | 1069.5 | 535.3 | 1052.5 | 1051.5 | R     | 175.1  |       | 158.1  |        | 1 |

# KC1D\_HUMAN: GTQEVAPPTPLTPTSHpTANTSPRPVSGMER

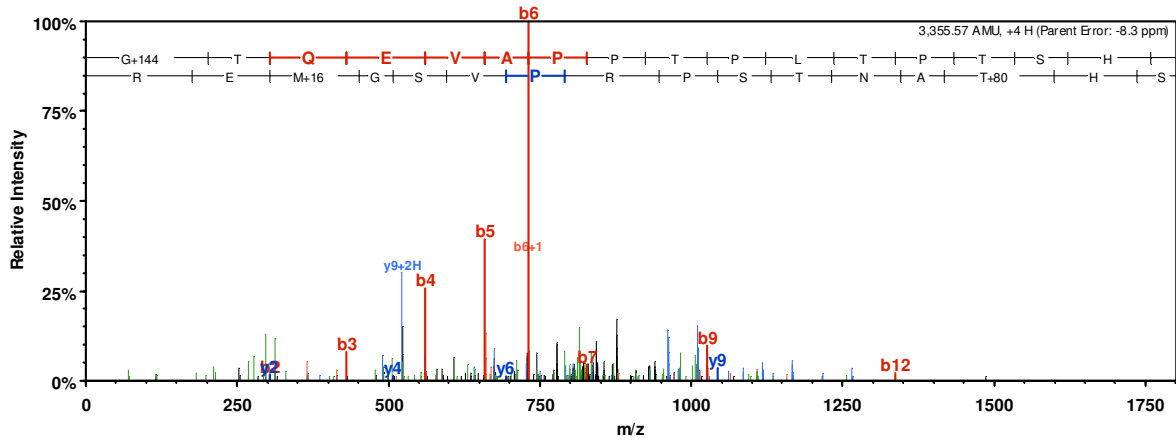

| B  | B Ions  | B+2H    | B-NH3   | B-H2O   | AA    | Y Ions  | Y+2H    | Y-NH3   | Y-H2O   | Y  |
|----|---------|---------|---------|---------|-------|---------|---------|---------|---------|----|
| 1  | 202.1   |         |         |         | G+144 | 3,356.6 | 1,678.8 | 3,339.6 | 3,338.6 | 30 |
| 2  | 303.2   |         |         | 285.2   | T     | 3,155.5 | 1,578.2 | 3,138.5 | 3,137.5 | 29 |
| 3  | 431.2   |         | 414.2   | 413.2   | Q     | 3,054.4 | 1,527.7 | 3,037.4 | 3,036.4 | 28 |
| 4  | 560.3   |         | 543.3   | 542.3   | E     | 2,926.4 | 1,463.7 | 2,909.4 | 2,908.4 | 27 |
| 5  | 659.3   |         | 642.3   | 641.3   | V     | 2,797.3 | 1,399.2 | 2,780.3 | 2,779.3 | 26 |
| 6  | 730.4   | 365.7   | 713.4   | 712.4   | A     | 2,698.3 | 1,349.6 | 2,681.2 | 2,680.3 | 25 |
| 7  | 827.4   | 414.2   | 810.4   | 809.4   | P     | 2,627.2 | 1,314.1 | 2,610.2 | 2,609.2 | 24 |
| 8  | 924.5   | 462.7   | 907.5   | 906.5   | P     | 2,530.2 | 1,265.6 | 2,513.1 | 2,512.2 | 23 |
| 9  | 1,025.5 | 513.3   | 1,008.5 | 1,007.5 | T     | 2,433.1 | 1,217.1 | 2,416.1 | 2,415.1 | 22 |
| 10 | 1,122.6 | 561.8   | 1,105.6 | 1,104.6 | P     | 2,332.1 | 1,166.5 | 2,315.0 | 2,314.1 | 21 |
| 11 | 1,235.7 | 618.3   | 1,218.6 | 1,217.7 | L     | 2,235.0 | 1,118.0 | 2,218.0 | 2,217.0 | 20 |
| 12 | 1,336.7 | 668.9   | 1,319.7 | 1,318.7 | T     | 2,121.9 | 1,061.5 | 2,104.9 | 2,103.9 | 19 |
| 13 | 1,433.8 | 717.4   | 1,416.8 | 1,415.8 | P     | 2,020.9 | 1,010.9 | 2,003.9 | 2,002.9 | 18 |
| 14 | 1,534.8 | 767.9   | 1,517.8 | 1,516.8 | T     | 1,923.8 | 962.4   | 1,906.8 | 1,905.8 | 17 |
| 15 | 1,621.9 | 811.4   | 1,604.8 | 1,603.8 | S     | 1,822.8 | 911.9   | 1,805.8 | 1,804.8 | 16 |
| 16 | 1,758.9 | 880.0   | 1,741.9 | 1,740.9 | H     | 1,735.8 | 868.4   | 1,718.7 | 1,717.7 | 15 |
| 17 | 1,939.9 | 970.5   | 1,922.9 | 1,921.9 | T+80  | 1,598.7 | 799.9   | 1,581.7 | 1,580.7 | 14 |
| 18 | 2,011.0 | 1,006.0 | 1,993.9 | 1,993.0 | A     | 1,417.7 | 709.3   | 1,400.7 | 1,399.7 | 13 |
| 19 | 2,125.0 | 1,063.0 | 2,108.0 | 2,107.0 | N     | 1,346.6 | 673.8   | 1,329.6 | 1,328.6 | 12 |
| 20 | 2,226.1 | 1,113.5 | 2,209.0 | 2,208.0 | T     | 1,232.6 | 616.8   | 1,215.6 | 1,214.6 | 11 |
| 21 | 2,313.1 | 1,157.0 | 2,296.1 | 2,295.1 | S     | 1,131.6 | 566.3   | 1,114.5 | 1,113.5 | 10 |
| 22 | 2,410.1 | 1,205.6 | 2,393.1 | 2,392.1 | P     | 1,044.5 | 522.8   | 1,027.5 | 1,026.5 | 9  |
| 23 | 2,566.2 | 1,283.6 | 2,549.2 | 2,548.2 | R     | 947.5   | 474.2   | 930.4   | 929.5   | 8  |
| 24 | 2,663.3 | 1,332.2 | 2,646.3 | 2,645.3 | P     | 791.4   | 396.2   | 774.3   | 773.4   | 7  |
| 25 | 2,762.4 | 1,381.7 | 2,745.3 | 2,744.4 | V     | 694.3   | 347.7   | 677.3   | 676.3   | 6  |
| 26 | 2,849.4 | 1,425.2 | 2,832.4 | 2,831.4 | S     | 595.3   |         | 578.2   | 577.2   | 5  |
| 27 | 2,906.4 | 1,453.7 | 2,889.4 | 2,888.4 | G     | 508.2   |         | 491.2   | 490.2   | 4  |
| 28 | 3,053.5 | 1,527.2 | 3,036.4 | 3,035.4 | M+16  | 451.2   |         | 434.2   | 433.2   | 3  |
| 29 | 3,182.5 | 1,591.8 | 3,165.5 | 3,164.5 | E     | 304.2   |         | 287.1   | 286.2   | 2  |
| 30 | 3,356.6 | 1,678.8 | 3,339.6 | 3,338.6 | R     | 175.1   |         | 158.1   |         | 1  |

# KC1E\_HUMAN: SAAEPVASTPpSR

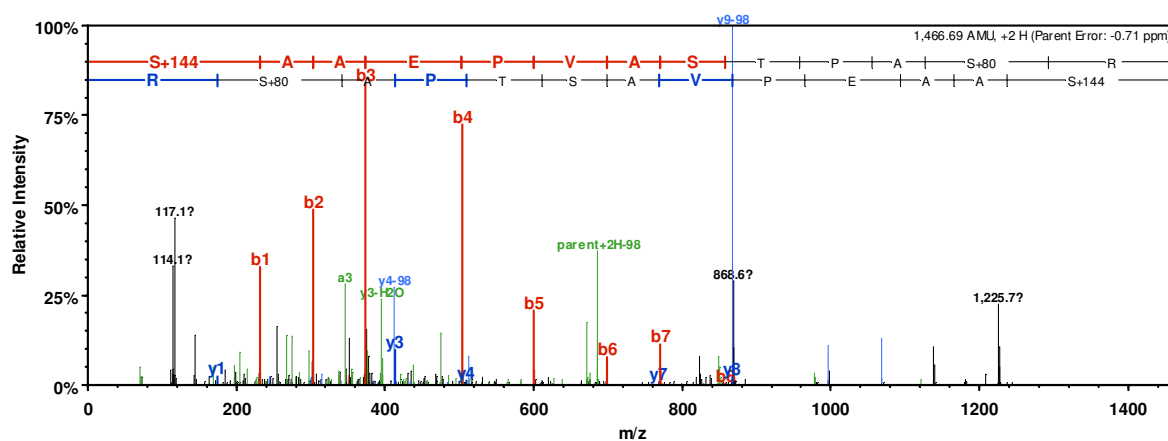

| B  | B Ions  | B+2H  | B-NH3   | B-H2O   | AA    | Y Ions  | Y+2H  | Y-NH3   | Y-H2O   | Y  |
|----|---------|-------|---------|---------|-------|---------|-------|---------|---------|----|
| 1  | 232.1   |       |         | 214.1   | S+144 | 1,467.7 | 734.4 | 1,450.7 | 1,449.7 | 13 |
| 2  | 303.2   |       |         | 285.2   | A     | 1,236.6 | 618.8 | 1,219.5 | 1,218.6 | 12 |
| 3  | 374.2   |       |         | 356.2   | A     | 1,165.5 | 583.3 | 1,148.5 | 1,147.5 | 11 |
| 4  | 503.3   |       |         | 485.2   | E     | 1,094.5 | 547.7 | 1,077.5 | 1,076.5 | 10 |
| 5  | 600.3   |       |         | 582.3   | P     | 965.4   | 483.2 | 948.4   | 947.4   | 9  |
| 6  | 699.4   | 350.2 |         | 681.4   | V     | 868.4   | 434.7 | 851.4   | 850.4   | 8  |
| 7  | 770.4   | 385.7 |         | 752.4   | A     | 769.3   | 385.2 | 752.3   | 751.3   | 7  |
| 8  | 857.4   | 429.2 |         | 839.4   | S     | 698.3   | 349.6 | 681.3   | 680.3   | 6  |
| 9  | 958.5   | 479.8 |         | 940.5   | T     | 611.3   |       | 594.2   | 593.2   | 5  |
| 10 | 1,055.5 | 528.3 |         | 1,037.5 | P     | 510.2   |       | 493.2   | 492.2   | 4  |
| 11 | 1,126.6 | 563.8 |         | 1,108.6 | A     | 413.2   |       | 396.1   | 395.1   | 3  |
| 12 | 1,293.6 | 647.3 |         | 1,275.6 | S+80  | 342.1   |       | 325.1   | 324.1   | 2  |
| 13 | 1,467.7 | 734.4 | 1,450.7 | 1,449.7 | R     | 175.1   |       | 158.1   |         | 1  |

# KCC2D\_HUMAN: ESTESSN<sup>p</sup>TTIEDEDVK

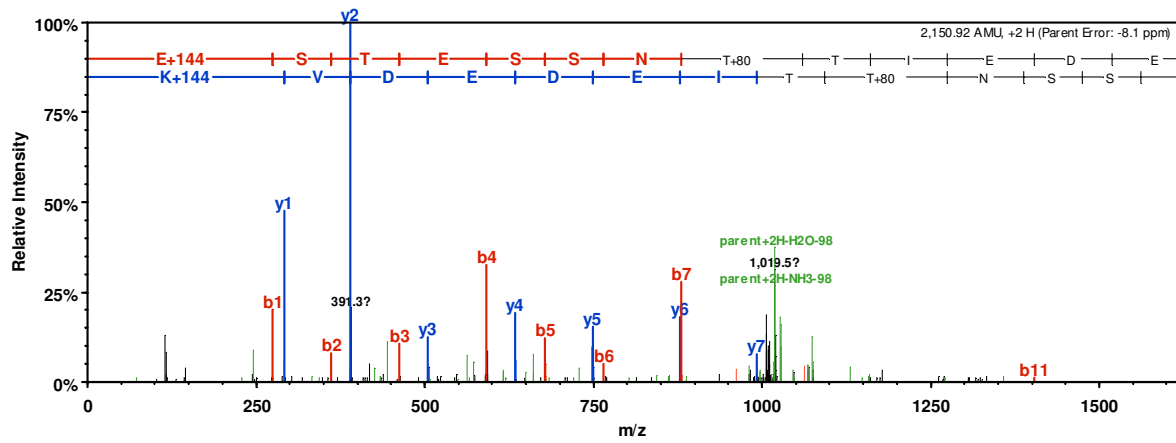

| B  | B Ions  | B+2H    | B-NH3   | B-H2O   | AA    | Y Ions  | Y+2H    | Y-NH3   | Y-H2O   | Y  |
|----|---------|---------|---------|---------|-------|---------|---------|---------|---------|----|
| 1  | 274.2   |         |         | 256.1   | E+144 | 2,151.9 | 1,076.5 | 2,134.9 | 2,133.9 | 16 |
| 2  | 361.2   |         |         | 343.2   | S     | 1,878.8 | 939.9   | 1,861.8 | 1,860.8 | 15 |
| 3  | 462.2   |         |         | 444.2   | T     | 1,791.8 | 896.4   | 1,774.7 | 1,773.8 | 14 |
| 4  | 591.3   |         |         | 573.3   | E     | 1,690.7 | 845.9   | 1,673.7 | 1,672.7 | 13 |
| 5  | 678.3   |         |         | 660.3   | S     | 1,561.7 | 781.3   | 1,544.6 | 1,543.7 | 12 |
| 6  | 765.3   | 383.2   |         | 747.3   | S     | 1,474.6 | 737.8   | 1,457.6 | 1,456.6 | 11 |
| 7  | 879.4   | 440.2   | 862.4   | 861.4   | N     | 1,387.6 | 694.3   | 1,370.6 | 1,369.6 | 10 |
| 8  | 1,060.4 | 530.7   | 1,043.4 | 1,042.4 | T+80  | 1,273.6 | 637.3   | 1,256.5 | 1,255.6 | 9  |
| 9  | 1,161.4 | 581.2   | 1,144.4 | 1,143.4 | T     | 1,092.6 | 546.8   | 1,075.5 | 1,074.5 | 8  |
| 10 | 1,274.5 | 637.8   | 1,257.5 | 1,256.5 | I     | 991.5   | 496.3   | 974.5   | 973.5   | 7  |
| 11 | 1,403.6 | 702.3   | 1,386.5 | 1,385.6 | E     | 878.4   | 439.7   | 861.4   | 860.4   | 6  |
| 12 | 1,518.6 | 759.8   | 1,501.6 | 1,500.6 | D     | 749.4   |         | 732.4   | 731.4   | 5  |
| 13 | 1,647.6 | 824.3   | 1,630.6 | 1,629.6 | E     | 634.4   |         | 617.3   | 616.3   | 4  |
| 14 | 1,762.7 | 881.8   | 1,745.6 | 1,744.7 | D     | 505.3   |         | 488.3   | 487.3   | 3  |
| 15 | 1,861.7 | 931.4   | 1,844.7 | 1,843.7 | V     | 390.3   |         | 373.3   |         | 2  |
| 16 | 2,151.9 | 1,076.5 | 2,134.9 | 2,133.9 | K+144 | 291.2   |         | 274.2   |         | 1  |



# KCC2D\_HUMAN: ESTESSNTpTIEDEDVK

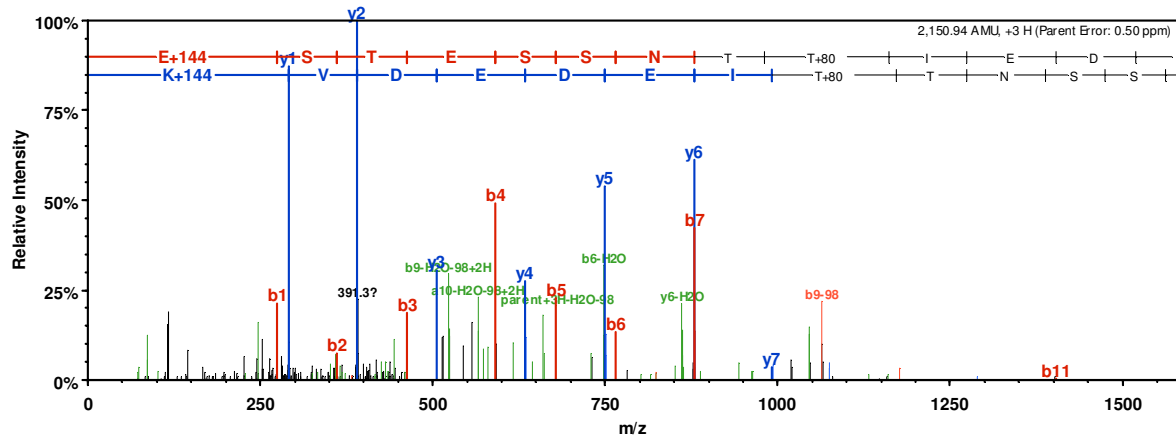

| B  | B Ions  | B+2H    | B-NH3   | B-H2O   | AA    | Y Ions  | Y+2H    | Y-NH3   | Y-H2O   | Y  |
|----|---------|---------|---------|---------|-------|---------|---------|---------|---------|----|
| 1  | 274.2   |         |         | 256.1   | E+144 | 2,151.9 | 1,076.5 | 2,134.9 | 2,133.9 | 16 |
| 2  | 361.2   |         |         | 343.2   | S     | 1,878.8 | 939.9   | 1,861.8 | 1,860.8 | 15 |
| 3  | 462.2   |         |         | 444.2   | T     | 1,791.8 | 896.4   | 1,774.7 | 1,773.8 | 14 |
| 4  | 591.3   |         |         | 573.3   | E     | 1,690.7 | 845.9   | 1,673.7 | 1,672.7 | 13 |
| 5  | 678.3   |         |         | 660.3   | S     | 1,561.7 | 781.3   | 1,544.6 | 1,543.7 | 12 |
| 6  | 765.3   | 383.2   |         | 747.3   | S     | 1,474.6 | 737.8   | 1,457.6 | 1,456.6 | 11 |
| 7  | 879.4   | 440.2   | 862.4   | 861.4   | N     | 1,387.6 | 694.3   | 1,370.6 | 1,369.6 | 10 |
| 8  | 980.4   | 490.7   | 963.4   | 962.4   | T     | 1,273.6 | 637.3   | 1,256.5 | 1,255.6 | 9  |
| 9  | 1,161.4 | 581.2   | 1,144.4 | 1,143.4 | T+80  | 1,172.5 | 586.8   | 1,155.5 | 1,154.5 | 8  |
| 10 | 1,274.5 | 637.8   | 1,257.5 | 1,256.5 | I     | 991.5   | 496.3   | 974.5   | 973.5   | 7  |
| 11 | 1,403.6 | 702.3   | 1,386.5 | 1,385.6 | E     | 878.4   | 439.7   | 861.4   | 860.4   | 6  |
| 12 | 1,518.6 | 759.8   | 1,501.6 | 1,500.6 | D     | 749.4   |         | 732.4   | 731.4   | 5  |
| 13 | 1,647.6 | 824.3   | 1,630.6 | 1,629.6 | E     | 634.4   |         | 617.3   | 616.3   | 4  |
| 14 | 1,762.7 | 881.8   | 1,745.6 | 1,744.7 | D     | 505.3   |         | 488.3   | 487.3   | 3  |
| 15 | 1,861.7 | 931.4   | 1,844.7 | 1,843.7 | V     | 390.3   |         | 373.3   |         | 2  |
| 16 | 2,151.9 | 1,076.5 | 2,134.9 | 2,133.9 | K+144 | 291.2   |         | 274.2   |         | 1  |

# KCC2D\_HUMAN: GAILT<sup>p</sup>TMLATR

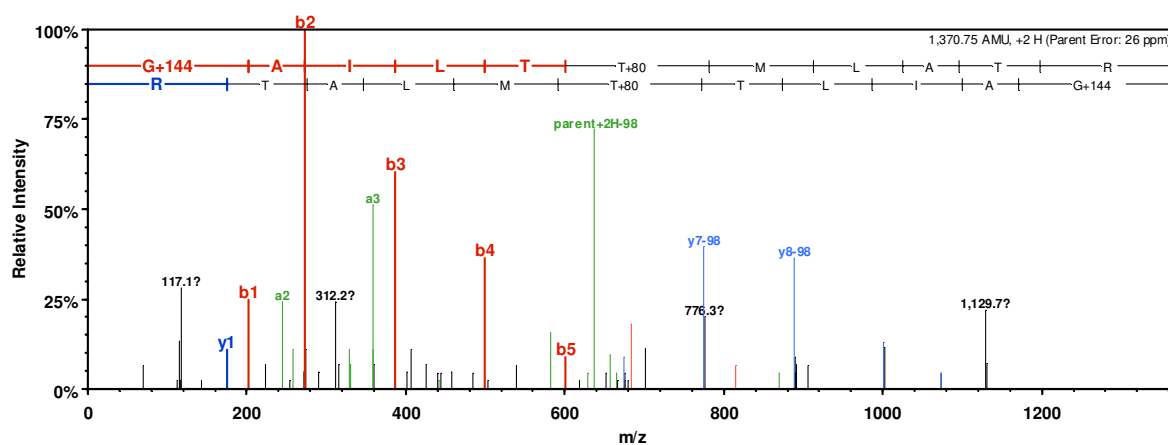

| B  | B Ions  | B+2H  | B-NH3   | B-H2O   | AA    | Y Ions  | Y+2H  | Y-NH3   | Y-H2O   | Y  |
|----|---------|-------|---------|---------|-------|---------|-------|---------|---------|----|
| 1  | 202.1   |       |         |         | G+144 | 1,371.7 | 686.4 | 1,354.7 | 1,353.7 | 11 |
| 2  | 273.2   |       |         |         | A     | 1,170.6 | 585.8 | 1,153.6 | 1,152.6 | 10 |
| 3  | 386.3   |       |         |         | I     | 1,099.6 | 550.3 | 1,082.5 | 1,081.5 | 9  |
| 4  | 499.3   |       |         |         | L     | 986.5   | 493.7 | 969.4   | 968.5   | 8  |
| 5  | 600.4   |       |         | 582.4   | T     | 873.4   | 437.2 | 856.4   | 855.4   | 7  |
| 6  | 781.4   | 391.2 |         | 763.4   | T+80  | 772.3   | 386.7 | 755.3   | 754.3   | 6  |
| 7  | 912.4   | 456.7 |         | 894.4   | M     | 591.3   |       | 574.3   | 573.3   | 5  |
| 8  | 1,025.5 | 513.3 |         | 1,007.5 | L     | 460.3   |       | 443.3   | 442.3   | 4  |
| 9  | 1,096.6 | 548.8 |         | 1,078.5 | A     | 347.2   |       | 330.2   | 329.2   | 3  |
| 10 | 1,197.6 | 599.3 |         | 1,179.6 | T     | 276.2   |       | 259.1   | 258.2   | 2  |
| 11 | 1,371.7 | 686.4 | 1,354.7 | 1,353.7 | R     | 175.1   |       | 158.1   |         | 1  |

# KCC2D\_HUMAN: KPDGVKESpTESSNTTIEDEDVK

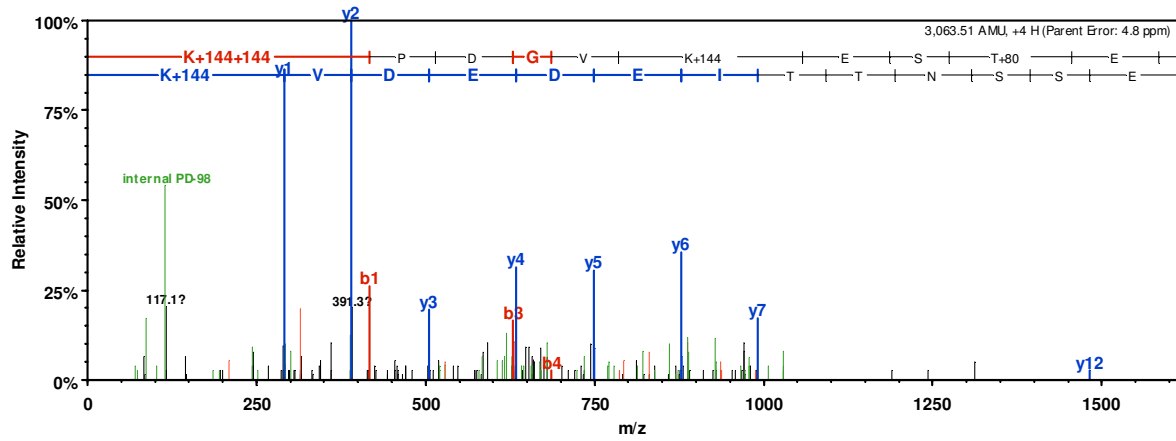

| B  | B Ions  | B+2H    | B-NH3   | B-H2O   | AA    | Y Ions  | Y+2H    | Y-NH3   | Y-H2O   | Y  |
|----|---------|---------|---------|---------|-------|---------|---------|---------|---------|----|
| 1  | 417.3   | 209.2   | 400.3   |         | K+288 | 3,064.5 | 1,532.8 | 3,047.5 | 3,046.5 | 22 |
| 2  | 514.4   | 257.7   | 497.3   |         | P     | 2,648.2 | 1,324.6 | 2,631.2 | 2,630.2 | 21 |
| 3  | 629.4   | 315.2   | 612.4   | 611.4   | D     | 2,551.2 | 1,276.1 | 2,534.1 | 2,533.1 | 20 |
| 4  | 686.4   | 343.7   | 669.4   | 668.4   | G     | 2,436.1 | 1,218.6 | 2,419.1 | 2,418.1 | 19 |
| 5  | 785.5   | 393.2   | 768.5   | 767.5   | V     | 2,379.1 | 1,190.1 | 2,362.1 | 2,361.1 | 18 |
| 6  | 1,057.7 | 529.3   | 1,040.6 | 1,039.7 | K+144 | 2,280.0 | 1,140.5 | 2,263.0 | 2,262.0 | 17 |
| 7  | 1,186.7 | 593.9   | 1,169.7 | 1,168.7 | E     | 2,007.8 | 1,004.4 | 1,990.8 | 1,989.8 | 16 |
| 8  | 1,273.7 | 637.4   | 1,256.7 | 1,255.7 | S     | 1,878.8 | 939.9   | 1,861.8 | 1,860.8 | 15 |
| 9  | 1,454.8 | 727.9   | 1,437.7 | 1,436.8 | T+80  | 1,791.8 | 896.4   | 1,774.7 | 1,773.8 | 14 |
| 10 | 1,583.8 | 792.4   | 1,566.8 | 1,565.8 | E     | 1,610.8 | 805.9   | 1,593.7 | 1,592.7 | 13 |
| 11 | 1,670.8 | 835.9   | 1,653.8 | 1,652.8 | S     | 1,481.7 | 741.4   | 1,464.7 | 1,463.7 | 12 |
| 12 | 1,757.9 | 879.4   | 1,740.8 | 1,739.9 | S     | 1,394.7 | 697.8   | 1,377.7 | 1,376.7 | 11 |
| 13 | 1,871.9 | 936.5   | 1,854.9 | 1,853.9 | N     | 1,307.6 | 654.3   | 1,290.6 | 1,289.6 | 10 |
| 14 | 1,973.0 | 987.0   | 1,955.9 | 1,954.9 | T     | 1,193.6 | 597.3   | 1,176.6 | 1,175.6 | 9  |
| 15 | 2,074.0 | 1,037.5 | 2,057.0 | 2,056.0 | T     | 1,092.6 | 546.8   | 1,075.5 | 1,074.5 | 8  |
| 16 | 2,187.1 | 1,094.0 | 2,170.1 | 2,169.1 | I     | 991.5   | 496.3   | 974.5   | 973.5   | 7  |
| 17 | 2,316.1 | 1,158.6 | 2,299.1 | 2,298.1 | E     | 878.4   | 439.7   | 861.4   | 860.4   | 6  |
| 18 | 2,431.2 | 1,216.1 | 2,414.1 | 2,413.2 | D     | 749.4   |         | 732.4   | 731.4   | 5  |
| 19 | 2,560.2 | 1,280.6 | 2,543.2 | 2,542.2 | E     | 634.4   |         | 617.3   | 616.3   | 4  |
| 20 | 2,675.2 | 1,338.1 | 2,658.2 | 2,657.2 | D     | 505.3   |         | 488.3   | 487.3   | 3  |
| 21 | 2,774.3 | 1,387.7 | 2,757.3 | 2,756.3 | V     | 390.3   |         | 373.3   |         | 2  |
| 22 | 3,064.5 | 1,532.8 | 3,047.5 | 3,046.5 | K+144 | 291.2   |         | 274.2   |         | 1  |

# KCC2D\_HUMAN: KPDGVKESTEpSSNTTIEDVDK

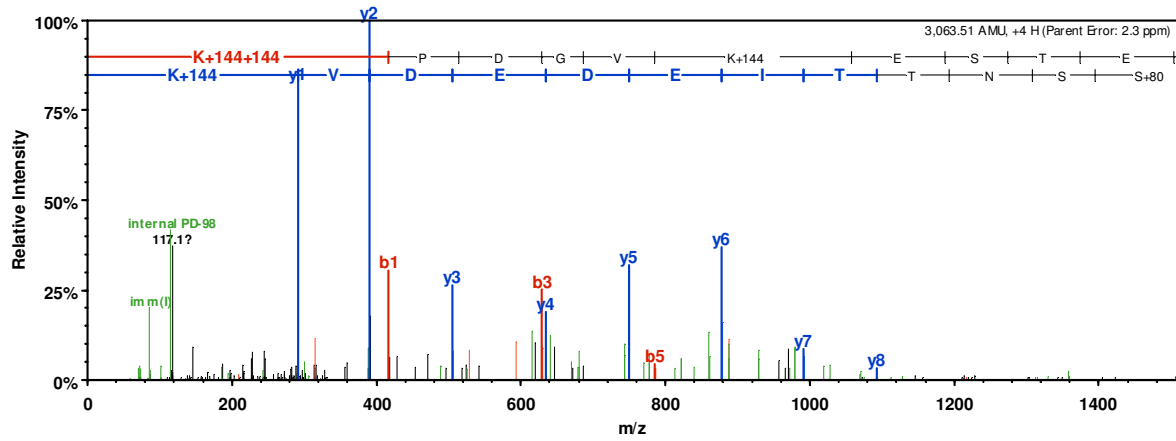

| B  | B Ions  | B+2H    | B-NH3   | B-H2O   | AA    | Y Ions  | Y+2H    | Y-NH3   | Y-H2O   | Y  |
|----|---------|---------|---------|---------|-------|---------|---------|---------|---------|----|
| 1  | 417.3   | 209.2   | 400.3   |         | K+288 | 3,064.5 | 1,532.8 | 3,047.5 | 3,046.5 | 22 |
| 2  | 514.4   | 257.7   | 497.3   |         | P     | 2,648.2 | 1,324.6 | 2,631.2 | 2,630.2 | 21 |
| 3  | 629.4   | 315.2   | 612.4   | 611.4   | D     | 2,551.2 | 1,276.1 | 2,534.1 | 2,533.1 | 20 |
| 4  | 686.4   | 343.7   | 669.4   | 668.4   | G     | 2,436.1 | 1,218.6 | 2,419.1 | 2,418.1 | 19 |
| 5  | 785.5   | 393.2   | 768.5   | 767.5   | V     | 2,379.1 | 1,190.1 | 2,362.1 | 2,361.1 | 18 |
| 6  | 1,057.7 | 529.3   | 1,040.6 | 1,039.7 | K+144 | 2,280.0 | 1,140.5 | 2,263.0 | 2,262.0 | 17 |
| 7  | 1,186.7 | 593.9   | 1,169.7 | 1,168.7 | E     | 2,007.8 | 1,004.4 | 1,990.8 | 1,989.8 | 16 |
| 8  | 1,273.7 | 637.4   | 1,256.7 | 1,255.7 | S     | 1,878.8 | 939.9   | 1,861.8 | 1,860.8 | 15 |
| 9  | 1,374.8 | 687.9   | 1,357.8 | 1,356.8 | T     | 1,791.8 | 896.4   | 1,774.7 | 1,773.8 | 14 |
| 10 | 1,503.8 | 752.4   | 1,486.8 | 1,485.8 | E     | 1,690.7 | 845.9   | 1,673.7 | 1,672.7 | 13 |
| 11 | 1,670.8 | 835.9   | 1,653.8 | 1,652.8 | S+80  | 1,561.7 | 781.3   | 1,544.6 | 1,543.7 | 12 |
| 12 | 1,757.9 | 879.4   | 1,740.8 | 1,739.9 | S     | 1,394.7 | 697.8   | 1,377.7 | 1,376.7 | 11 |
| 13 | 1,871.9 | 936.5   | 1,854.9 | 1,853.9 | N     | 1,307.6 | 654.3   | 1,290.6 | 1,289.6 | 10 |
| 14 | 1,973.0 | 987.0   | 1,955.9 | 1,954.9 | T     | 1,193.6 | 597.3   | 1,176.6 | 1,175.6 | 9  |
| 15 | 2,074.0 | 1,037.5 | 2,057.0 | 2,056.0 | T     | 1,092.6 | 546.8   | 1,075.5 | 1,074.5 | 8  |
| 16 | 2,187.1 | 1,094.0 | 2,170.1 | 2,169.1 | I     | 991.5   | 496.3   | 974.5   | 973.5   | 7  |
| 17 | 2,316.1 | 1,158.6 | 2,299.1 | 2,298.1 | E     | 878.4   | 439.7   | 861.4   | 860.4   | 6  |
| 18 | 2,431.2 | 1,216.1 | 2,414.1 | 2,413.2 | D     | 749.4   |         | 732.4   | 731.4   | 5  |
| 19 | 2,560.2 | 1,280.6 | 2,543.2 | 2,542.2 | E     | 634.4   |         | 617.3   | 616.3   | 4  |
| 20 | 2,675.2 | 1,338.1 | 2,658.2 | 2,657.2 | D     | 505.3   |         | 488.3   | 487.3   | 3  |
| 21 | 2,774.3 | 1,387.7 | 2,757.3 | 2,756.3 | V     | 390.3   |         | 373.3   |         | 2  |
| 22 | 3,064.5 | 1,532.8 | 3,047.5 | 3,046.5 | K+144 | 291.2   |         | 274.2   |         | 1  |

# KCC2D\_HUMAN: NFpSAAKpSLLK

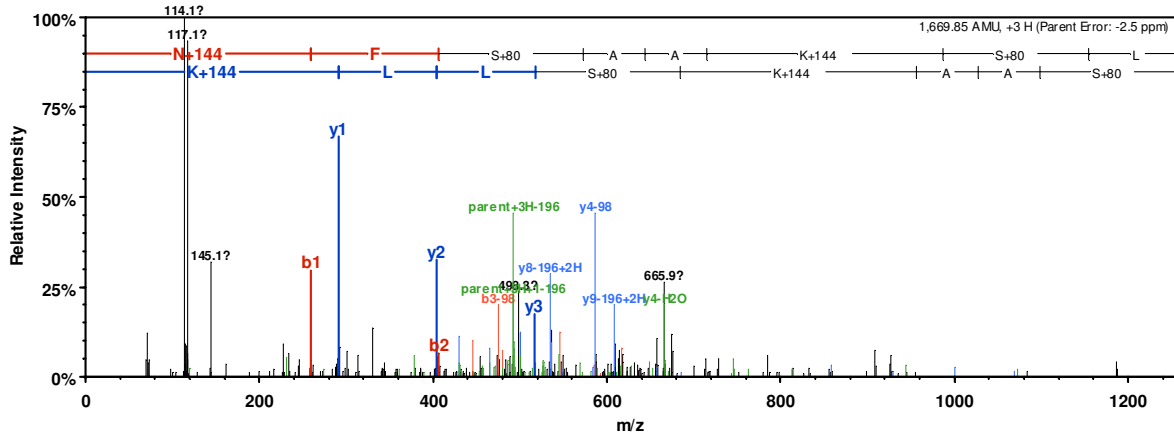

| B  | B Ions  | B+2H  | B-NH3   | B-H2O   | AA    | Y Ions  | Y+2H  | Y-NH3   | Y-H2O   | Y  |
|----|---------|-------|---------|---------|-------|---------|-------|---------|---------|----|
| 1  | 259.2   |       | 242.1   |         | N+144 | 1,670.9 | 835.9 | 1,653.8 | 1,652.9 | 10 |
| 2  | 406.2   |       | 389.2   |         | F     | 1,412.7 | 706.9 | 1,395.7 | 1,394.7 | 9  |
| 3  | 573.2   |       | 556.2   | 555.2   | S+80  | 1,265.7 | 633.3 | 1,248.6 | 1,247.6 | 8  |
| 4  | 644.3   |       | 627.2   | 626.2   | A     | 1,098.7 | 549.8 | 1,081.6 | 1,080.6 | 7  |
| 5  | 715.3   |       | 698.3   | 697.3   | A     | 1,027.6 | 514.3 | 1,010.6 | 1,009.6 | 6  |
| 6  | 987.5   | 494.2 | 970.5   | 969.5   | K+144 | 956.6   | 478.8 | 939.6   | 938.6   | 5  |
| 7  | 1,154.5 | 577.7 | 1,137.5 | 1,136.5 | S+80  | 684.4   |       | 667.4   | 666.4   | 4  |
| 8  | 1,267.6 | 634.3 | 1,250.5 | 1,249.6 | L     | 517.4   |       | 500.4   |         | 3  |
| 9  | 1,380.7 | 690.8 | 1,363.6 | 1,362.6 | L     | 404.3   |       | 387.3   |         | 2  |
| 10 | 1,670.9 | 835.9 | 1,653.8 | 1,652.9 | K+144 | 291.2   |       | 274.2   |         | 1  |

# KCC2D\_HUMAN: QEpTVDCLK

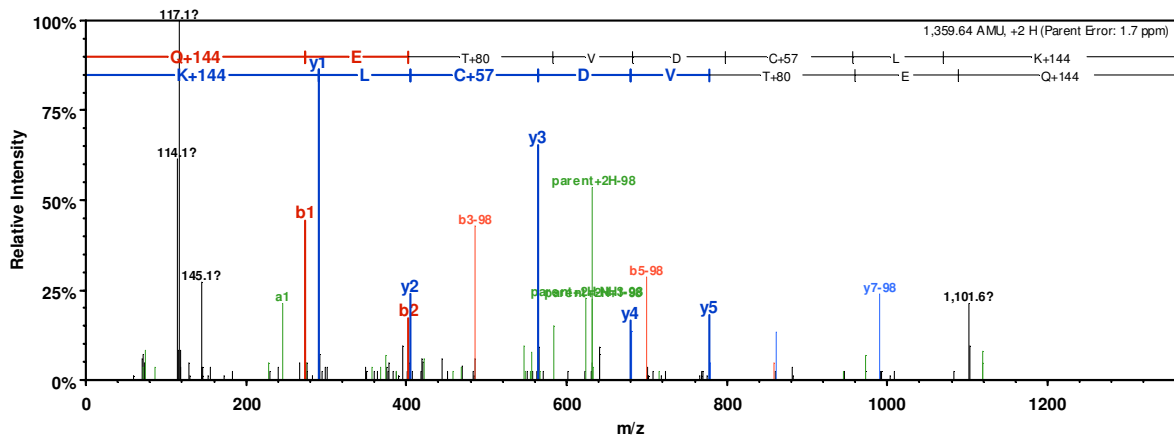

| B | B Ions  | B+2H  | B-NH3   | B-H2O   | AA    | Y Ions  | Y+2H  | Y-NH3   | Y-H2O   | Y |
|---|---------|-------|---------|---------|-------|---------|-------|---------|---------|---|
| 1 | 273.2   |       | 256.1   |         | Q+144 | 1,360.6 | 680.8 | 1,343.6 | 1,342.6 | 8 |
| 2 | 402.2   |       | 385.2   | 384.2   | E     | 1,088.5 | 544.7 | 1,071.5 | 1,070.5 | 7 |
| 3 | 583.2   |       | 566.2   | 565.2   | T+80  | 959.4   | 480.2 | 942.4   | 941.4   | 6 |
| 4 | 682.3   |       | 665.3   | 664.3   | V     | 778.4   |       | 761.4   | 760.4   | 5 |
| 5 | 797.3   |       | 780.3   | 779.3   | D     | 679.4   |       | 662.3   | 661.3   | 4 |
| 6 | 957.4   | 479.2 | 940.3   | 939.3   | C+57  | 564.3   |       | 547.3   |         | 3 |
| 7 | 1,070.4 | 535.7 | 1,053.4 | 1,052.4 | L     | 404.3   |       | 387.3   |         | 2 |
| 8 | 1,360.6 | 680.8 | 1,343.6 | 1,342.6 | K+144 | 291.2   |       | 274.2   |         | 1 |

# KCC2G\_HUMAN: GAILT<sup>p</sup>TMLV<sup>p</sup>SR

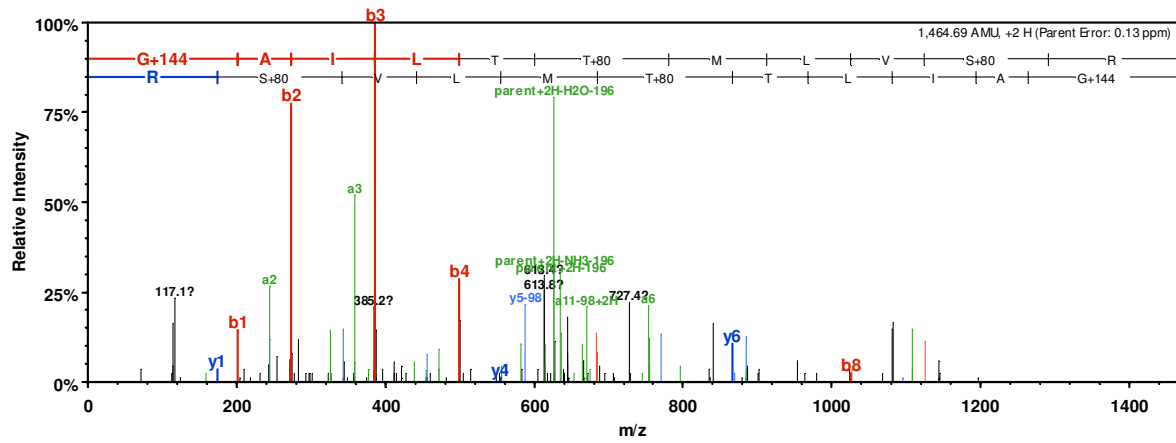

| B  | B Ions  | B+2H  | B-NH3   | B-H2O   | AA    | Y Ions  | Y+2H  | Y-NH3   | Y-H2O   | Y  |
|----|---------|-------|---------|---------|-------|---------|-------|---------|---------|----|
| 1  | 202.1   |       |         |         | G+144 | 1,465.7 | 733.4 | 1,448.7 | 1,447.7 | 11 |
| 2  | 273.2   |       |         |         | A     | 1,264.6 | 632.8 | 1,247.6 | 1,246.6 | 10 |
| 3  | 386.3   |       |         |         | I     | 1,193.5 | 597.3 | 1,176.5 | 1,175.5 | 9  |
| 4  | 499.3   |       |         |         | L     | 1,080.5 | 540.7 | 1,063.4 | 1,062.4 | 8  |
| 5  | 600.4   |       |         | 582.4   | T     | 967.4   | 484.2 | 950.3   | 949.4   | 7  |
| 6  | 781.4   | 391.2 |         | 763.4   | T+80  | 866.3   | 433.7 | 849.3   | 848.3   | 6  |
| 7  | 912.4   | 456.7 |         | 894.4   | M     | 685.3   |       | 668.3   | 667.3   | 5  |
| 8  | 1,025.5 | 513.3 |         | 1,007.5 | L     | 554.3   |       | 537.2   | 536.3   | 4  |
| 9  | 1,124.6 | 562.8 |         | 1,106.6 | V     | 441.2   |       | 424.2   | 423.2   | 3  |
| 10 | 1,291.6 | 646.3 |         | 1,273.6 | S+80  | 342.1   |       | 325.1   | 324.1   | 2  |
| 11 | 1,465.7 | 733.4 | 1,448.7 | 1,447.7 | R     | 175.1   |       | 158.1   |         | 1  |

# KCC2G\_HUMAN: GAILT<sup>p</sup>TMLVSR

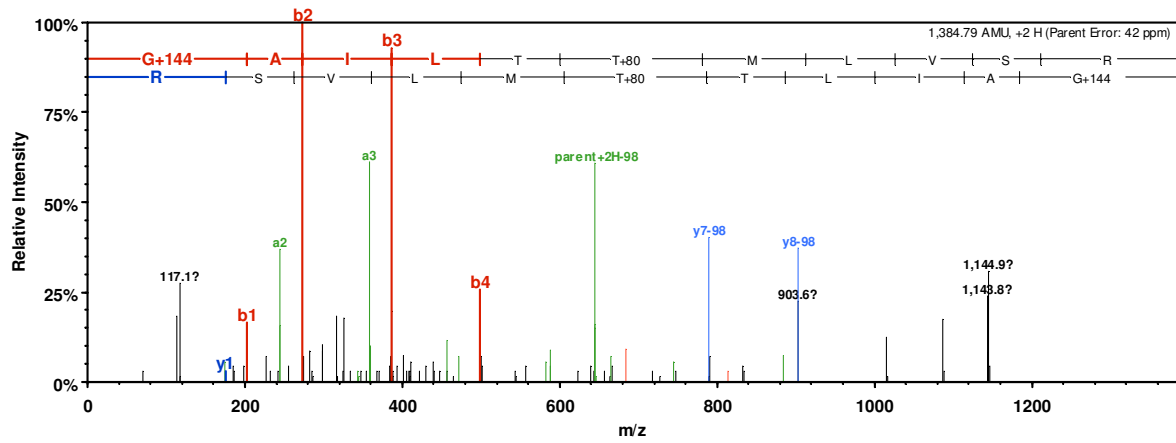

| B  | B Ions  | B+2H  | B-NH3   | B-H2O   | AA    | Y Ions  | Y+2H  | Y-NH3   | Y-H2O   | Y  |
|----|---------|-------|---------|---------|-------|---------|-------|---------|---------|----|
| 1  | 202.1   |       |         |         | G+144 | 1,385.7 | 693.4 | 1,368.7 | 1,367.7 | 11 |
| 2  | 273.2   |       |         |         | A     | 1,184.6 | 592.8 | 1,167.6 | 1,166.6 | 10 |
| 3  | 386.3   |       |         |         | I     | 1,113.6 | 557.3 | 1,096.5 | 1,095.6 | 9  |
| 4  | 499.3   |       |         |         | L     | 1,000.5 | 500.7 | 983.5   | 982.5   | 8  |
| 5  | 600.4   |       |         | 582.4   | T     | 887.4   | 444.2 | 870.4   | 869.4   | 7  |
| 6  | 781.4   | 391.2 |         | 763.4   | T+80  | 786.4   | 393.7 | 769.3   | 768.3   | 6  |
| 7  | 912.4   | 456.7 |         | 894.4   | M     | 605.3   |       | 588.3   | 587.3   | 5  |
| 8  | 1,025.5 | 513.3 |         | 1,007.5 | L     | 474.3   |       | 457.3   | 456.3   | 4  |
| 9  | 1,124.6 | 562.8 |         | 1,106.6 | V     | 361.2   |       | 344.2   | 343.2   | 3  |
| 10 | 1,211.6 | 606.3 |         | 1,193.6 | S     | 262.2   |       | 245.1   | 244.1   | 2  |
| 11 | 1,385.7 | 693.4 | 1,368.7 | 1,367.7 | R     | 175.1   |       | 158.1   |         | 1  |



# KCC2G\_HUMAN: GAILTTMLVpSR

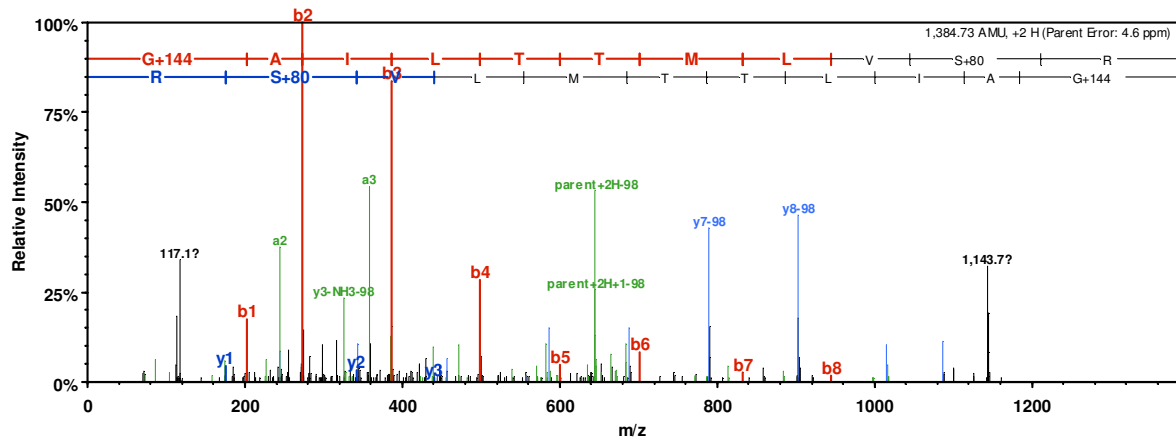

| B  | B Ions  | B+2H  | B-NH3   | B-H2O   | AA    | Y Ions  | Y+2H  | Y-NH3   | Y-H2O   | Y  |
|----|---------|-------|---------|---------|-------|---------|-------|---------|---------|----|
| 1  | 202.1   |       |         |         | G+144 | 1,385.7 | 693.4 | 1,368.7 | 1,367.7 | 11 |
| 2  | 273.2   |       |         |         | A     | 1,184.6 | 592.8 | 1,167.6 | 1,166.6 | 10 |
| 3  | 386.3   |       |         |         | I     | 1,113.6 | 557.3 | 1,096.5 | 1,095.6 | 9  |
| 4  | 499.3   |       |         |         | L     | 1,000.5 | 500.7 | 983.5   | 982.5   | 8  |
| 5  | 600.4   |       |         | 582.4   | T     | 887.4   | 444.2 | 870.4   | 869.4   | 7  |
| 6  | 701.4   | 351.2 |         | 683.4   | T     | 786.4   | 393.7 | 769.3   | 768.3   | 6  |
| 7  | 832.5   | 416.7 |         | 814.5   | M     | 685.3   |       | 668.3   | 667.3   | 5  |
| 8  | 945.6   | 473.3 |         | 927.5   | L     | 554.3   |       | 537.2   | 536.3   | 4  |
| 9  | 1,044.6 | 522.8 |         | 1,026.6 | V     | 441.2   |       | 424.2   | 423.2   | 3  |
| 10 | 1,211.6 | 606.3 |         | 1,193.6 | S+80  | 342.1   |       | 325.1   | 324.1   | 2  |
| 11 | 1,385.7 | 693.4 | 1,368.7 | 1,367.7 | R     | 175.1   |       | 158.1   |         | 1  |

# KCC2G\_HUMAN: GpSTESCNTTTEDEDLK

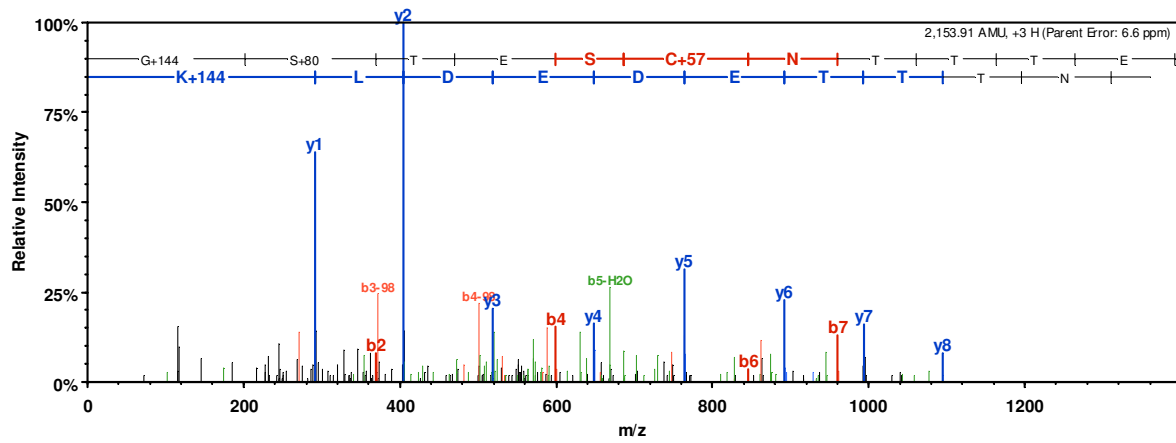

| B  | B Ions  | B+2H    | B-NH3   | B-H2O   | AA    | Y Ions  | Y+2H    | Y-NH3   | Y-H2O   | Y  |
|----|---------|---------|---------|---------|-------|---------|---------|---------|---------|----|
| 1  | 202.1   |         |         |         | G+144 | 2,154.9 | 1,078.0 | 2,137.9 | 2,136.9 | 16 |
| 2  | 369.1   |         |         | 351.1   | S+80  | 1,953.8 | 977.4   | 1,936.7 | 1,935.8 | 15 |
| 3  | 470.2   |         |         | 452.2   | T     | 1,786.8 | 893.9   | 1,769.8 | 1,768.8 | 14 |
| 4  | 599.2   |         |         | 581.2   | E     | 1,685.7 | 843.4   | 1,668.7 | 1,667.7 | 13 |
| 5  | 686.3   |         |         | 668.2   | S     | 1,556.7 | 778.8   | 1,539.7 | 1,538.7 | 12 |
| 6  | 846.3   | 423.6   |         | 828.3   | C+57  | 1,469.7 | 735.3   | 1,452.6 | 1,451.6 | 11 |
| 7  | 960.3   | 480.7   | 943.3   | 942.3   | N     | 1,309.6 | 655.3   | 1,292.6 | 1,291.6 | 10 |
| 8  | 1,061.4 | 531.2   | 1,044.3 | 1,043.4 | T     | 1,195.6 | 598.3   | 1,178.6 | 1,177.6 | 9  |
| 9  | 1,162.4 | 581.7   | 1,145.4 | 1,144.4 | T     | 1,094.5 | 547.8   | 1,077.5 | 1,076.5 | 8  |
| 10 | 1,263.5 | 632.2   | 1,246.4 | 1,245.5 | T     | 993.5   | 497.2   | 976.5   | 975.5   | 7  |
| 11 | 1,392.5 | 696.8   | 1,375.5 | 1,374.5 | E     | 892.4   | 446.7   | 875.4   | 874.4   | 6  |
| 12 | 1,507.5 | 754.3   | 1,490.5 | 1,489.5 | D     | 763.4   |         | 746.4   | 745.4   | 5  |
| 13 | 1,636.6 | 818.8   | 1,619.6 | 1,618.6 | E     | 648.4   |         | 631.3   | 630.4   | 4  |
| 14 | 1,751.6 | 876.3   | 1,734.6 | 1,733.6 | D     | 519.3   |         | 502.3   | 501.3   | 3  |
| 15 | 1,864.7 | 932.8   | 1,847.7 | 1,846.7 | L     | 404.3   |         | 387.3   |         | 2  |
| 16 | 2,154.9 | 1,078.0 | 2,137.9 | 2,136.9 | K+144 | 291.2   |         | 274.2   |         | 1  |

# KCC2G\_HUMAN: GSPTESCNTTTEDEDLK

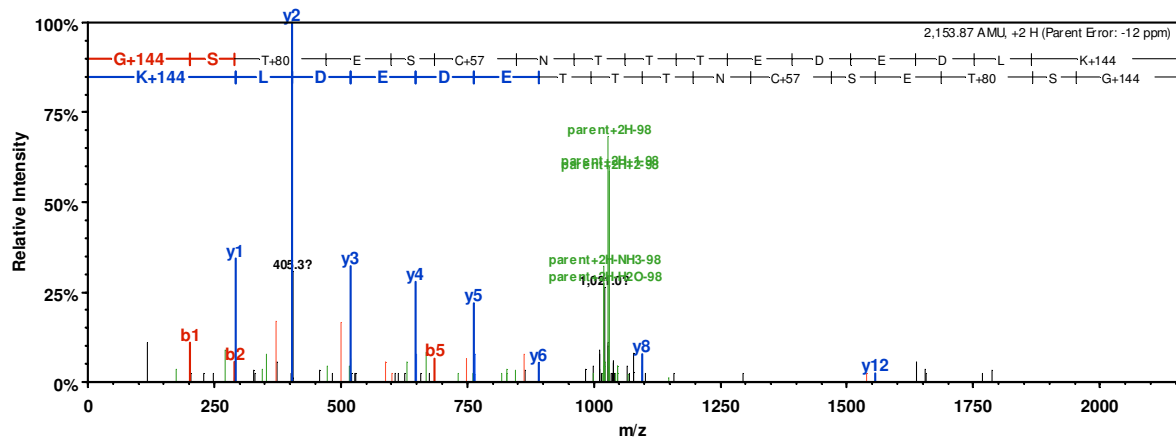

| B  | B Ions  | B+2H    | B-NH3   | B-H2O   | AA    | Y Ions  | Y+2H    | Y-NH3   | Y-H2O   | Y  |
|----|---------|---------|---------|---------|-------|---------|---------|---------|---------|----|
| 1  | 202.1   |         |         |         | G+144 | 2,154.9 | 1,078.0 | 2,137.9 | 2,136.9 | 16 |
| 2  | 289.2   |         |         | 271.2   | S     | 1,953.8 | 977.4   | 1,936.7 | 1,935.8 | 15 |
| 3  | 470.2   |         |         | 452.2   | T+80  | 1,866.7 | 933.9   | 1,849.7 | 1,848.7 | 14 |
| 4  | 599.2   |         |         | 581.2   | E     | 1,685.7 | 843.4   | 1,668.7 | 1,667.7 | 13 |
| 5  | 686.3   |         |         | 668.2   | S     | 1,556.7 | 778.8   | 1,539.7 | 1,538.7 | 12 |
| 6  | 846.3   | 423.6   |         | 828.3   | C+57  | 1,469.7 | 735.3   | 1,452.6 | 1,451.6 | 11 |
| 7  | 960.3   | 480.7   | 943.3   | 942.3   | N     | 1,309.6 | 655.3   | 1,292.6 | 1,291.6 | 10 |
| 8  | 1,061.4 | 531.2   | 1,044.3 | 1,043.4 | T     | 1,195.6 | 598.3   | 1,178.6 | 1,177.6 | 9  |
| 9  | 1,162.4 | 581.7   | 1,145.4 | 1,144.4 | T     | 1,094.5 | 547.8   | 1,077.5 | 1,076.5 | 8  |
| 10 | 1,263.5 | 632.2   | 1,246.4 | 1,245.5 | T     | 993.5   | 497.2   | 976.5   | 975.5   | 7  |
| 11 | 1,392.5 | 696.8   | 1,375.5 | 1,374.5 | E     | 892.4   | 446.7   | 875.4   | 874.4   | 6  |
| 12 | 1,507.5 | 754.3   | 1,490.5 | 1,489.5 | D     | 763.4   |         | 746.4   | 745.4   | 5  |
| 13 | 1,636.6 | 818.8   | 1,619.6 | 1,618.6 | E     | 648.4   |         | 631.3   | 630.4   | 4  |
| 14 | 1,751.6 | 876.3   | 1,734.6 | 1,733.6 | D     | 519.3   |         | 502.3   | 501.3   | 3  |
| 15 | 1,864.7 | 932.8   | 1,847.7 | 1,846.7 | L     | 404.3   |         | 387.3   |         | 2  |
| 16 | 2,154.9 | 1,078.0 | 2,137.9 | 2,136.9 | K+144 | 291.2   |         | 274.2   |         | 1  |

# KCC2G\_HUMAN: GSTEpSCNTTTEDEDLK

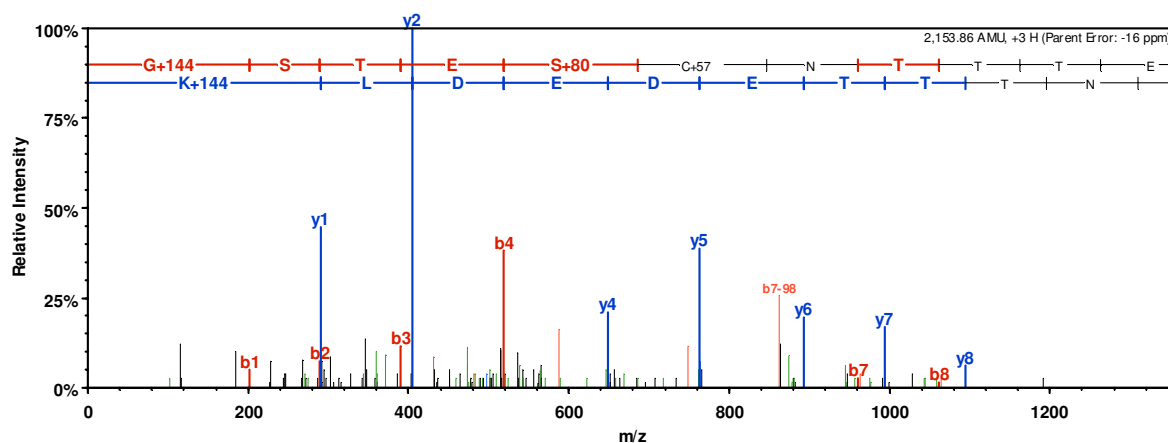

| B  | B Ions  | B+2H    | B-NH3   | B-H2O   | AA    | Y Ions  | Y+2H    | Y-NH3   | Y-H2O   | Y  |
|----|---------|---------|---------|---------|-------|---------|---------|---------|---------|----|
| 1  | 202.1   |         |         |         | G+144 | 2,154.9 | 1,078.0 | 2,137.9 | 2,136.9 | 16 |
| 2  | 289.2   |         |         | 271.2   | S     | 1,953.8 | 977.4   | 1,936.7 | 1,935.8 | 15 |
| 3  | 390.2   |         |         | 372.2   | T     | 1,866.7 | 933.9   | 1,849.7 | 1,848.7 | 14 |
| 4  | 519.3   |         |         | 501.2   | E     | 1,765.7 | 883.4   | 1,748.7 | 1,747.7 | 13 |
| 5  | 686.3   |         |         | 668.2   | S+80  | 1,636.7 | 818.8   | 1,619.6 | 1,618.6 | 12 |
| 6  | 846.3   | 423.6   |         | 828.3   | C+57  | 1,469.7 | 735.3   | 1,452.6 | 1,451.6 | 11 |
| 7  | 960.3   | 480.7   | 943.3   | 942.3   | N     | 1,309.6 | 655.3   | 1,292.6 | 1,291.6 | 10 |
| 8  | 1,061.4 | 531.2   | 1,044.3 | 1,043.4 | T     | 1,195.6 | 598.3   | 1,178.6 | 1,177.6 | 9  |
| 9  | 1,162.4 | 581.7   | 1,145.4 | 1,144.4 | T     | 1,094.5 | 547.8   | 1,077.5 | 1,076.5 | 8  |
| 10 | 1,263.5 | 632.2   | 1,246.4 | 1,245.5 | T     | 993.5   | 497.2   | 976.5   | 975.5   | 7  |
| 11 | 1,392.5 | 696.8   | 1,375.5 | 1,374.5 | E     | 892.4   | 446.7   | 875.4   | 874.4   | 6  |
| 12 | 1,507.5 | 754.3   | 1,490.5 | 1,489.5 | D     | 763.4   |         | 746.4   | 745.4   | 5  |
| 13 | 1,636.6 | 818.8   | 1,619.6 | 1,618.6 | E     | 648.4   |         | 631.3   | 630.4   | 4  |
| 14 | 1,751.6 | 876.3   | 1,734.6 | 1,733.6 | D     | 519.3   |         | 502.3   | 501.3   | 3  |
| 15 | 1,864.7 | 932.8   | 1,847.7 | 1,846.7 | L     | 404.3   |         | 387.3   |         | 2  |
| 16 | 2,154.9 | 1,078.0 | 2,137.9 | 2,136.9 | K+144 | 291.2   |         | 274.2   |         | 1  |

# KCC2G\_HUMAN: NFpSAAK

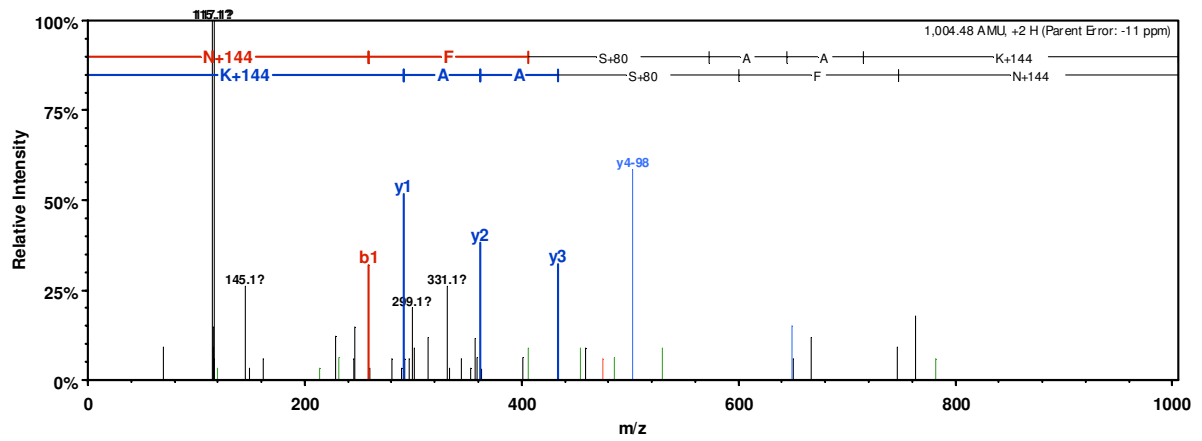

| B | B Ions  | B+2H  | B-NH3 | B-H2O | AA    | Y Ions  | Y+2H  | Y-NH3 | Y-H2O | Y |
|---|---------|-------|-------|-------|-------|---------|-------|-------|-------|---|
| 1 | 259.2   |       | 242.1 |       | N+144 | 1,005.5 | 503.3 | 988.5 | 987.5 | 6 |
| 2 | 406.2   |       | 389.2 |       | F     | 747.4   |       | 730.3 | 729.3 | 5 |
| 3 | 573.2   |       | 556.2 | 555.2 | S+80  | 600.3   |       | 583.3 | 582.3 | 4 |
| 4 | 644.3   |       | 627.2 | 626.2 | A     | 433.3   |       | 416.3 |       | 3 |
| 5 | 715.3   |       | 698.3 | 697.3 | A     | 362.3   |       | 345.2 |       | 2 |
| 6 | 1,005.5 | 503.3 | 988.5 | 987.5 | K+144 | 291.2   |       | 274.2 |       | 1 |

# KCC2G\_HUMAN: NFpSAAKpSLLNK

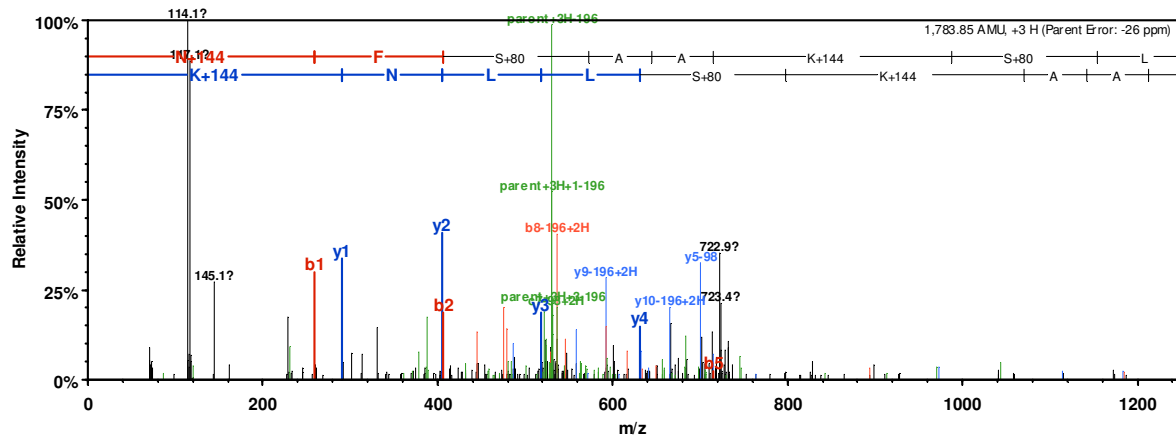

| B  | B Ions  | B+2H  | B-NH3   | B-H2O   | AA    | Y Ions  | Y+2H  | Y-NH3   | Y-H2O   | Y  |
|----|---------|-------|---------|---------|-------|---------|-------|---------|---------|----|
| 1  | 259.2   |       | 242.1   |         | N+144 | 1,784.9 | 893.0 | 1,767.9 | 1,766.9 | 11 |
| 2  | 406.2   |       | 389.2   |         | F     | 1,526.8 | 763.9 | 1,509.7 | 1,508.8 | 10 |
| 3  | 573.2   |       | 556.2   | 555.2   | S+80  | 1,379.7 | 690.4 | 1,362.7 | 1,361.7 | 9  |
| 4  | 644.3   |       | 627.2   | 626.2   | A     | 1,212.7 | 606.9 | 1,195.7 | 1,194.7 | 8  |
| 5  | 715.3   |       | 698.3   | 697.3   | A     | 1,141.7 | 571.3 | 1,124.6 | 1,123.6 | 7  |
| 6  | 987.5   | 494.2 | 970.5   | 969.5   | K+144 | 1,070.6 | 535.8 | 1,053.6 | 1,052.6 | 6  |
| 7  | 1,154.5 | 577.7 | 1,137.5 | 1,136.5 | S+80  | 798.4   |       | 781.4   | 780.4   | 5  |
| 8  | 1,267.6 | 634.3 | 1,250.5 | 1,249.6 | L     | 631.4   |       | 614.4   |         | 4  |
| 9  | 1,380.7 | 690.8 | 1,363.6 | 1,362.6 | L     | 518.3   |       | 501.3   |         | 3  |
| 10 | 1,494.7 | 747.9 | 1,477.7 | 1,476.7 | N     | 405.3   |       | 388.2   |         | 2  |
| 11 | 1,784.9 | 893.0 | 1,767.9 | 1,766.9 | K+144 | 291.2   |       | 274.2   |         | 1  |

# KCC2G\_HUMAN: QEpTVECLR

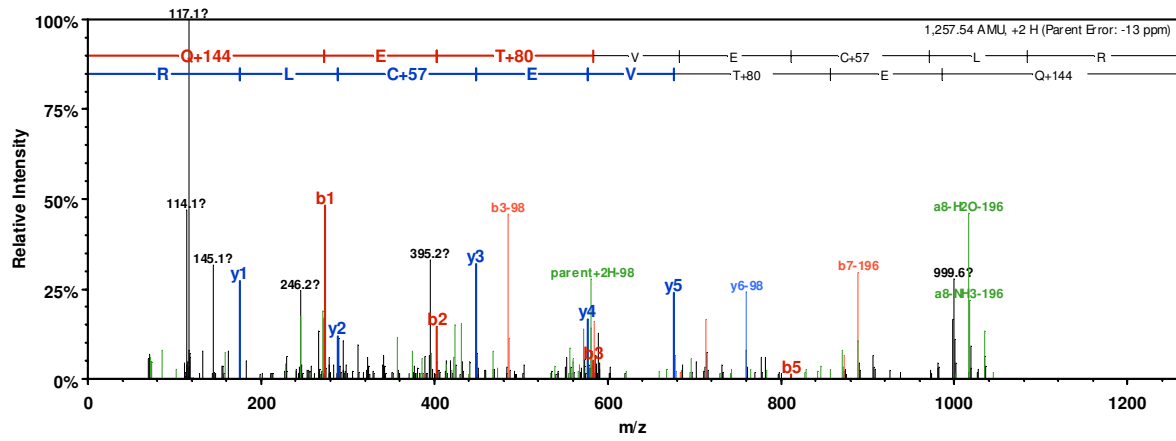

| B | B Ions  | B+2H  | B-NH3   | B-H2O   | AA    | Y Ions  | Y+2H  | Y-NH3   | Y-H2O   | Y |
|---|---------|-------|---------|---------|-------|---------|-------|---------|---------|---|
| 1 | 273.2   |       | 256.1   |         | Q+144 | 1,258.6 | 629.8 | 1,241.5 | 1,240.6 | 8 |
| 2 | 402.2   |       | 385.2   | 384.2   | E     | 986.4   | 493.7 | 969.4   | 968.4   | 7 |
| 3 | 583.2   |       | 566.2   | 565.2   | T+80  | 857.4   | 429.2 | 840.3   | 839.3   | 6 |
| 4 | 682.3   |       | 665.3   | 664.3   | V     | 676.3   |       | 659.3   | 658.3   | 5 |
| 5 | 811.3   |       | 794.3   | 793.3   | E     | 577.3   |       | 560.3   | 559.3   | 4 |
| 6 | 971.4   | 486.2 | 954.3   | 953.4   | C+57  | 448.2   |       | 431.2   |         | 3 |
| 7 | 1,084.5 | 542.7 | 1,067.4 | 1,066.4 | L     | 288.2   |       | 271.2   |         | 2 |
| 8 | 1,258.6 | 629.8 | 1,241.5 | 1,240.6 | R     | 175.1   |       | 158.1   |         | 1 |

# RIPK2\_HUMAN: SPpSLNLLQNK

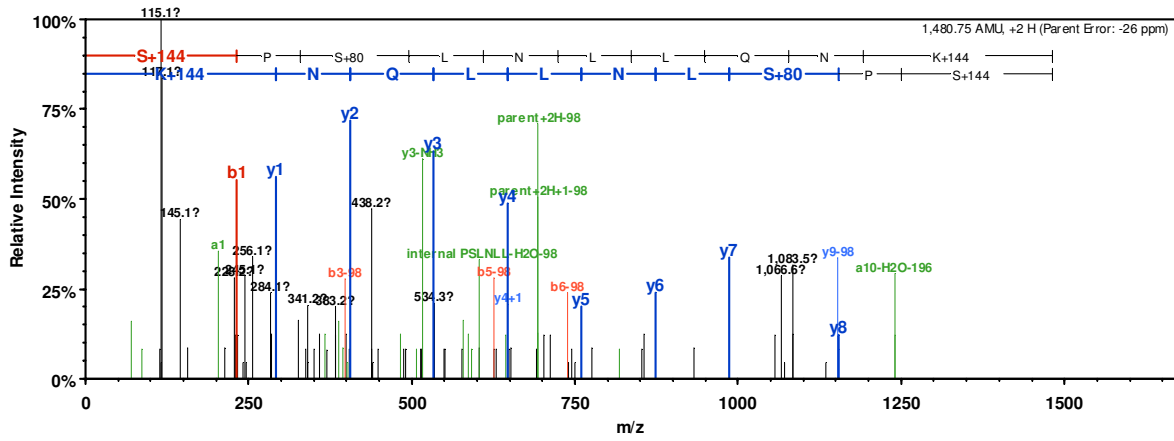

| B  | B Ions  | B+2H  | B-NH3   | B-H2O   | AA    | Y Ions  | Y+2H  | Y-NH3   | Y-H2O   | Y  |
|----|---------|-------|---------|---------|-------|---------|-------|---------|---------|----|
| 1  | 232.1   |       |         | 214.1   | S+144 | 1,481.8 | 741.4 | 1,464.8 | 1,463.8 | 10 |
| 2  | 329.2   |       |         | 311.2   | P     | 1,250.7 | 625.8 | 1,233.6 | 1,232.7 | 9  |
| 3  | 496.2   |       |         | 478.2   | S+80  | 1,153.6 | 577.3 | 1,136.6 | 1,135.6 | 8  |
| 4  | 609.3   |       |         | 591.3   | L     | 986.6   | 493.8 | 969.6   |         | 7  |
| 5  | 723.3   |       | 706.3   | 705.3   | N     | 873.5   | 437.3 | 856.5   |         | 6  |
| 6  | 836.4   | 418.7 | 819.4   | 818.4   | L     | 759.5   |       | 742.5   |         | 5  |
| 7  | 949.5   | 475.2 | 932.5   | 931.5   | L     | 646.4   |       | 629.4   |         | 4  |
| 8  | 1,077.5 | 539.3 | 1,060.5 | 1,059.5 | Q     | 533.3   |       | 516.3   |         | 3  |
| 9  | 1,191.6 | 596.3 | 1,174.6 | 1,173.6 | N     | 405.3   |       | 388.2   |         | 2  |
| 10 | 1,481.8 | 741.4 | 1,464.8 | 1,463.8 | K+144 | 291.2   |       | 274.2   |         | 1  |



# STK3\_HUMAN: ELEEEENpSDEELDSHTMVK

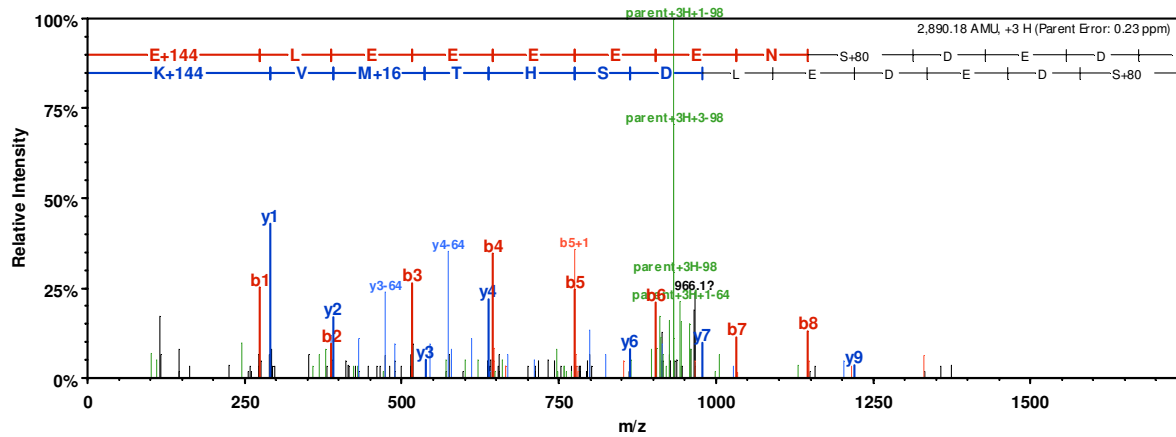

| B  | B Ions | B+2H   | B-NH3  | B-H2O  | AA    | Y Ions | Y+2H   | Y-NH3  | Y-H2O  | Y  |
|----|--------|--------|--------|--------|-------|--------|--------|--------|--------|----|
| 1  | 274.2  |        |        | 256.1  | E+144 | 2891.2 | 1446.1 | 2874.2 | 2873.2 | 21 |
| 2  | 387.2  |        |        | 369.2  | L     | 2618.0 | 1309.5 | 2601.0 | 2600.0 | 20 |
| 3  | 516.3  |        |        | 498.3  | E     | 2505.0 | 1253.0 | 2487.9 | 2487.0 | 19 |
| 4  | 645.3  |        |        | 627.3  | E     | 2375.9 | 1188.5 | 2358.9 | 2357.9 | 18 |
| 5  | 774.4  |        |        | 756.4  | E     | 2246.9 | 1123.9 | 2229.9 | 2228.9 | 17 |
| 6  | 903.4  | 452.2  |        | 885.4  | E     | 2117.8 | 1059.4 | 2100.8 | 2099.8 | 16 |
| 7  | 1032.4 | 516.7  |        | 1014.4 | E     | 1988.8 | 994.9  | 1971.8 | 1970.8 | 15 |
| 8  | 1146.5 | 573.8  | 1129.5 | 1128.5 | N     | 1859.7 | 930.4  | 1842.7 | 1841.7 | 14 |
| 9  | 1313.5 | 657.2  | 1296.5 | 1295.5 | S+80  | 1745.7 | 873.4  | 1728.7 | 1727.7 | 13 |
| 10 | 1428.5 | 714.8  | 1411.5 | 1410.5 | D     | 1578.7 | 789.9  | 1561.7 | 1560.7 | 12 |
| 11 | 1557.6 | 779.3  | 1540.5 | 1539.5 | E     | 1463.7 | 732.3  | 1446.7 | 1445.7 | 11 |
| 12 | 1672.6 | 836.8  | 1655.6 | 1654.6 | D     | 1334.6 | 667.8  | 1317.6 | 1316.6 | 10 |
| 13 | 1801.6 | 901.3  | 1784.6 | 1783.6 | E     | 1219.6 | 610.3  | 1202.6 | 1201.6 | 9  |
| 14 | 1914.7 | 957.9  | 1897.7 | 1896.7 | L     | 1090.6 | 545.8  | 1073.5 | 1072.6 | 8  |
| 15 | 2029.7 | 1015.4 | 2012.7 | 2011.7 | D     | 977.5  | 489.2  | 960.5  | 959.5  | 7  |
| 16 | 2116.8 | 1058.9 | 2099.7 | 2098.8 | S     | 862.5  | 431.7  | 845.4  | 844.4  | 6  |
| 17 | 2253.8 | 1127.4 | 2236.8 | 2235.8 | H     | 775.4  | 388.2  | 758.4  | 757.4  | 5  |
| 18 | 2354.9 | 1177.9 | 2337.9 | 2336.9 | T     | 638.4  |        | 621.3  | 620.4  | 4  |
| 19 | 2501.9 | 1251.5 | 2484.9 | 2483.9 | M+16  | 537.3  |        | 520.3  |        | 3  |
| 20 | 2601.0 | 1301.0 | 2584.0 | 2583.0 | V     | 390.3  |        | 373.3  |        | 2  |
| 21 | 2891.2 | 1446.1 | 2874.2 | 2873.2 | K+144 | 291.2  |        | 274.2  |        | 1  |

# KPCD2\_HUMAN: RLpSSTSLASGHpSVR

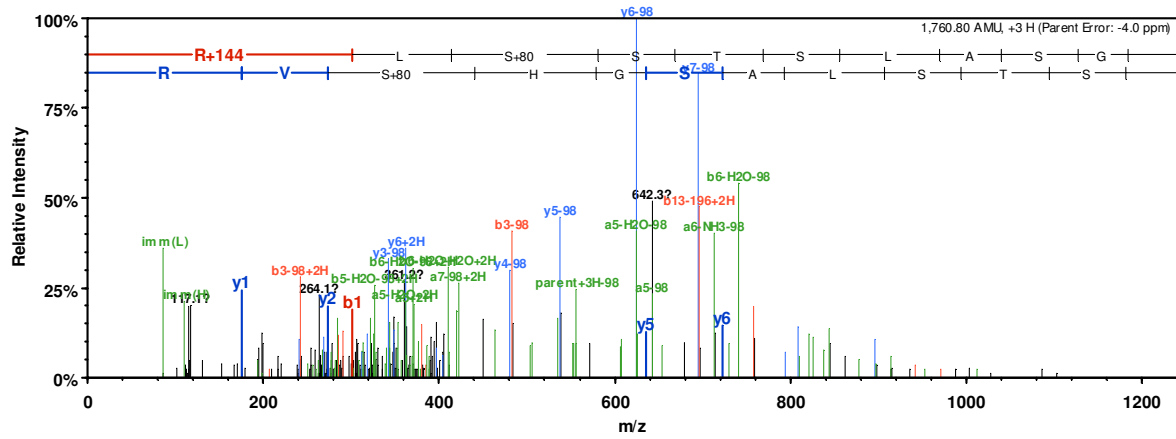

| B  | B Ions  | B+2H  | B-NH3   | B-H2O   | AA    | Y Ions  | Y+2H  | Y-NH3   | Y-H2O   | Y  |
|----|---------|-------|---------|---------|-------|---------|-------|---------|---------|----|
| 1  | 301.2   | 151.1 | 284.2   |         | R+144 | 1,761.8 | 881.4 | 1,744.8 | 1,743.8 | 14 |
| 2  | 414.3   | 207.7 | 397.3   |         | L     | 1,461.6 | 731.3 | 1,444.6 | 1,443.6 | 13 |
| 3  | 581.3   | 291.2 | 564.3   | 563.3   | S+80  | 1,348.5 | 674.8 | 1,331.5 | 1,330.5 | 12 |
| 4  | 668.3   | 334.7 | 651.3   | 650.3   | S     | 1,181.5 | 591.3 | 1,164.5 | 1,163.5 | 11 |
| 5  | 769.4   | 385.2 | 752.3   | 751.4   | T     | 1,094.5 | 547.8 | 1,077.5 | 1,076.5 | 10 |
| 6  | 856.4   | 428.7 | 839.4   | 838.4   | S     | 993.5   | 497.2 | 976.4   | 975.4   | 9  |
| 7  | 969.5   | 485.2 | 952.5   | 951.5   | L     | 906.4   | 453.7 | 889.4   | 888.4   | 8  |
| 8  | 1,040.5 | 520.8 | 1,023.5 | 1,022.5 | A     | 793.3   | 397.2 | 776.3   | 775.3   | 7  |
| 9  | 1,127.6 | 564.3 | 1,110.5 | 1,109.5 | S     | 722.3   | 361.7 | 705.3   | 704.3   | 6  |
| 10 | 1,184.6 | 592.8 | 1,167.6 | 1,166.6 | G     | 635.3   | 318.1 | 618.2   | 617.3   | 5  |
| 11 | 1,321.6 | 661.3 | 1,304.6 | 1,303.6 | H     | 578.2   | 289.6 | 561.2   | 560.2   | 4  |
| 12 | 1,488.6 | 744.8 | 1,471.6 | 1,470.6 | S+80  | 441.2   |       | 424.2   | 423.2   | 3  |
| 13 | 1,587.7 | 794.4 | 1,570.7 | 1,569.7 | V     | 274.2   |       | 257.2   |         | 2  |
| 14 | 1,761.8 | 881.4 | 1,744.8 | 1,743.8 | R     | 175.1   |       | 158.1   |         | 1  |

# KPCD2\_HUMAN: SpTTELLPR

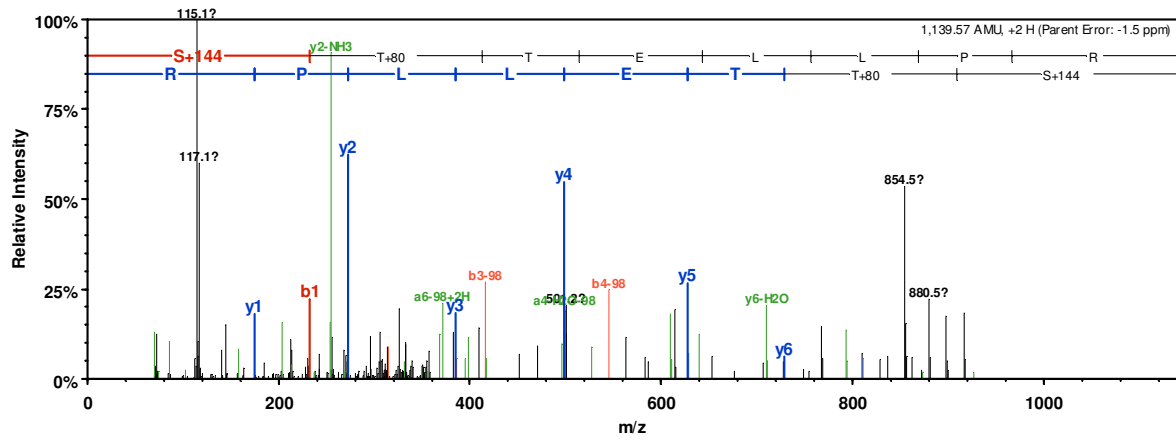

| B | B Ions  | B+2H  | B-NH3   | B-H2O   | AA    | Y Ions  | Y+2H  | Y-NH3   | Y-H2O   | Y |
|---|---------|-------|---------|---------|-------|---------|-------|---------|---------|---|
| 1 | 232.1   |       |         | 214.1   | S+144 | 1,140.6 | 570.8 | 1,123.6 | 1,122.6 | 8 |
| 2 | 413.2   |       |         | 395.1   | T+80  | 909.4   | 455.2 | 892.4   | 891.4   | 7 |
| 3 | 514.2   |       |         | 496.2   | T     | 728.4   | 364.7 | 711.4   | 710.4   | 6 |
| 4 | 643.2   |       |         | 625.2   | E     | 627.4   |       | 610.4   | 609.4   | 5 |
| 5 | 756.3   |       |         | 738.3   | L     | 498.3   |       | 481.3   |         | 4 |
| 6 | 869.4   | 435.2 |         | 851.4   | L     | 385.3   |       | 368.2   |         | 3 |
| 7 | 966.5   | 483.7 |         | 948.5   | P     | 272.2   |       | 255.1   |         | 2 |
| 8 | 1,140.6 | 570.8 | 1,123.6 | 1,122.6 | R     | 175.1   |       | 158.1   |         | 1 |

# KPCD2\_HUMAN: STpTELLPR

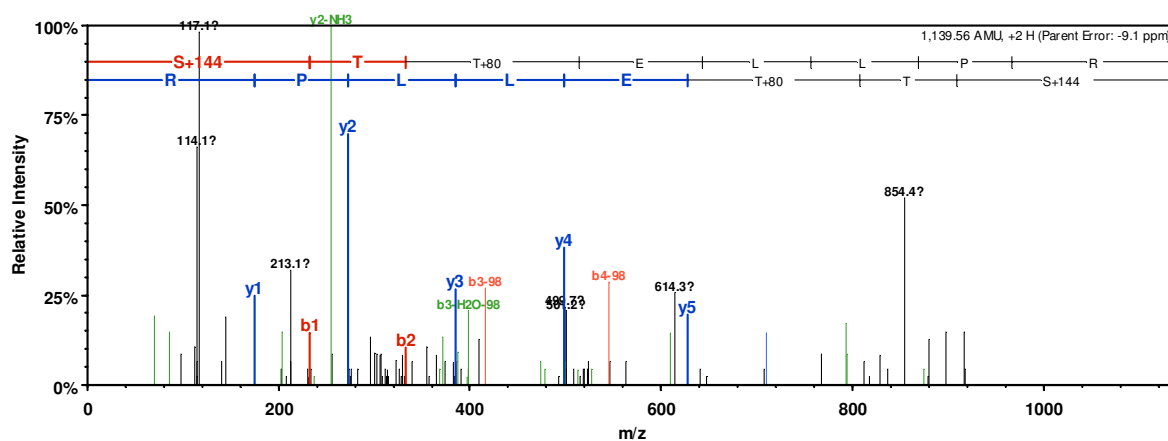

| B | B Ions  | B+2H  | B-NH3   | B-H2O   | AA    | Y Ions  | Y+2H  | Y-NH3   | Y-H2O   | Y |
|---|---------|-------|---------|---------|-------|---------|-------|---------|---------|---|
| 1 | 232.1   |       |         | 214.1   | S+144 | 1,140.6 | 570.8 | 1,123.6 | 1,122.6 | 8 |
| 2 | 333.2   |       |         | 315.2   | T     | 909.4   | 455.2 | 892.4   | 891.4   | 7 |
| 3 | 514.2   |       |         | 496.2   | T+80  | 808.4   | 404.7 | 791.4   | 790.4   | 6 |
| 4 | 643.2   |       |         | 625.2   | E     | 627.4   |       | 610.4   | 609.4   | 5 |
| 5 | 756.3   |       |         | 738.3   | L     | 498.3   |       | 481.3   |         | 4 |
| 6 | 869.4   | 435.2 |         | 851.4   | L     | 385.3   |       | 368.2   |         | 3 |
| 7 | 966.5   | 483.7 |         | 948.5   | P     | 272.2   |       | 255.1   |         | 2 |
| 8 | 1,140.6 | 570.8 | 1,123.6 | 1,122.6 | R     | 175.1   |       | 158.1   |         | 1 |

# KPCD3\_HUMAN: GLDDpTEEPSPPEDK

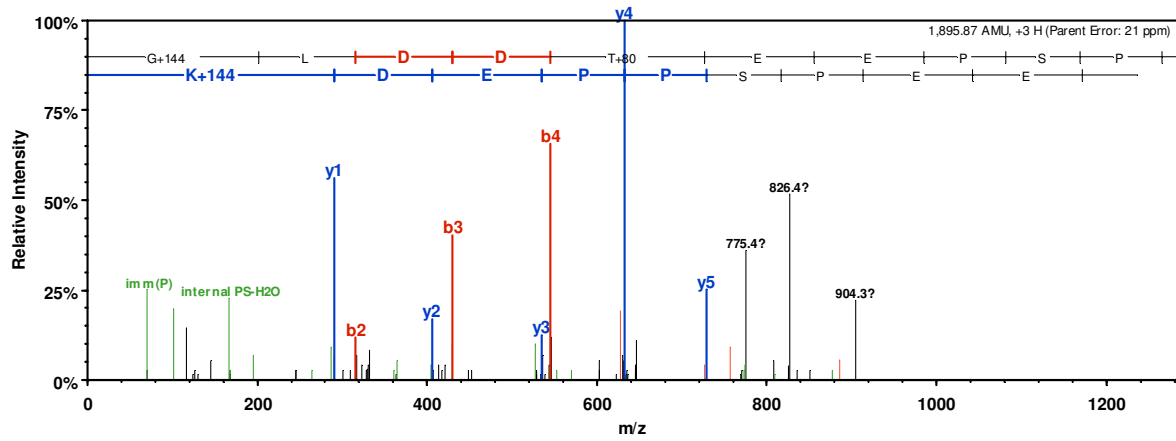

| B  | B Ions  | B+2H  | B-NH3   | B-H2O   | AA    | Y Ions  | Y+2H  | Y-NH3   | Y-H2O   | Y  |
|----|---------|-------|---------|---------|-------|---------|-------|---------|---------|----|
| 1  | 202.1   |       |         |         | G+144 | 1,896.8 | 948.9 | 1,879.8 | 1,878.8 | 14 |
| 2  | 315.2   |       |         |         | L     | 1,695.7 | 848.4 | 1,678.7 | 1,677.7 | 13 |
| 3  | 430.2   |       |         | 412.2   | D     | 1,582.6 | 791.8 | 1,565.6 | 1,564.6 | 12 |
| 4  | 545.3   |       |         | 527.3   | D     | 1,467.6 | 734.3 | 1,450.6 | 1,449.6 | 11 |
| 5  | 726.3   |       |         | 708.3   | T+80  | 1,352.6 | 676.8 | 1,335.5 | 1,334.6 | 10 |
| 6  | 855.3   | 428.2 |         | 837.3   | E     | 1,171.6 | 586.3 | 1,154.5 | 1,153.6 | 9  |
| 7  | 984.4   | 492.7 |         | 966.4   | E     | 1,042.5 | 521.8 | 1,025.5 | 1,024.5 | 8  |
| 8  | 1,081.4 | 541.2 |         | 1,063.4 | P     | 913.5   | 457.2 | 896.4   | 895.5   | 7  |
| 9  | 1,168.5 | 584.7 |         | 1,150.4 | S     | 816.4   | 408.7 | 799.4   | 798.4   | 6  |
| 10 | 1,265.5 | 633.3 |         | 1,247.5 | P     | 729.4   |       | 712.4   | 711.4   | 5  |
| 11 | 1,362.6 | 681.8 |         | 1,344.5 | P     | 632.3   |       | 615.3   | 614.3   | 4  |
| 12 | 1,491.6 | 746.3 |         | 1,473.6 | E     | 535.3   |       | 518.3   | 517.3   | 3  |
| 13 | 1,606.6 | 803.8 |         | 1,588.6 | D     | 406.2   |       | 389.2   | 388.2   | 2  |
| 14 | 1,896.8 | 948.9 | 1,879.8 | 1,878.8 | K+144 | 291.2   |       | 274.2   |         | 1  |

# KPCD3\_HUMAN: LpSNGSFSAPSLTNSR

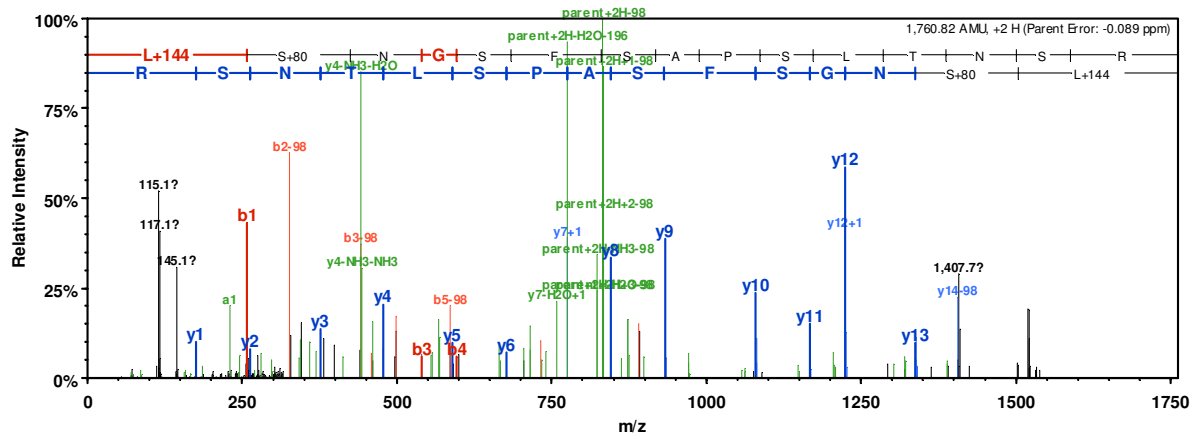

| B  | B Ions  | B+2H  | B-NH3   | B-H2O   | AA    | Y Ions  | Y+2H  | Y-NH3   | Y-H2O   | Y  |
|----|---------|-------|---------|---------|-------|---------|-------|---------|---------|----|
| 1  | 258.2   |       |         |         | L+144 | 1,761.8 | 881.4 | 1,744.8 | 1,743.8 | 15 |
| 2  | 425.2   |       |         | 407.2   | S+80  | 1,504.6 | 752.8 | 1,487.6 | 1,486.6 | 14 |
| 3  | 539.2   |       | 522.2   | 521.2   | N     | 1,337.6 | 669.3 | 1,320.6 | 1,319.6 | 13 |
| 4  | 596.3   |       | 579.2   | 578.2   | G     | 1,223.6 | 612.3 | 1,206.6 | 1,205.6 | 12 |
| 5  | 683.3   |       | 666.3   | 665.3   | S     | 1,166.6 | 583.8 | 1,149.6 | 1,148.6 | 11 |
| 6  | 830.4   | 415.7 | 813.3   | 812.3   | F     | 1,079.5 | 540.3 | 1,062.5 | 1,061.5 | 10 |
| 7  | 917.4   | 459.2 | 900.4   | 899.4   | S     | 932.5   | 466.7 | 915.5   | 914.5   | 9  |
| 8  | 988.4   | 494.7 | 971.4   | 970.4   | A     | 845.4   | 423.2 | 828.4   | 827.4   | 8  |
| 9  | 1,085.5 | 543.2 | 1,068.5 | 1,067.5 | P     | 774.4   | 387.7 | 757.4   | 756.4   | 7  |
| 10 | 1,172.5 | 586.8 | 1,155.5 | 1,154.5 | S     | 677.4   | 339.2 | 660.3   | 659.3   | 6  |
| 11 | 1,285.6 | 643.3 | 1,268.6 | 1,267.6 | L     | 590.3   |       | 573.3   | 572.3   | 5  |
| 12 | 1,386.6 | 693.8 | 1,369.6 | 1,368.6 | T     | 477.2   |       | 460.2   | 459.2   | 4  |
| 13 | 1,500.7 | 750.8 | 1,483.7 | 1,482.7 | N     | 376.2   |       | 359.2   | 358.2   | 3  |
| 14 | 1,587.7 | 794.4 | 1,570.7 | 1,569.7 | S     | 262.2   |       | 245.1   | 244.1   | 2  |
| 15 | 1,761.8 | 881.4 | 1,744.8 | 1,743.8 | R     | 175.1   |       | 158.1   |         | 1  |

# KPCD3\_HUMAN: SVLPTAIPAVLPAApSPCSSPK

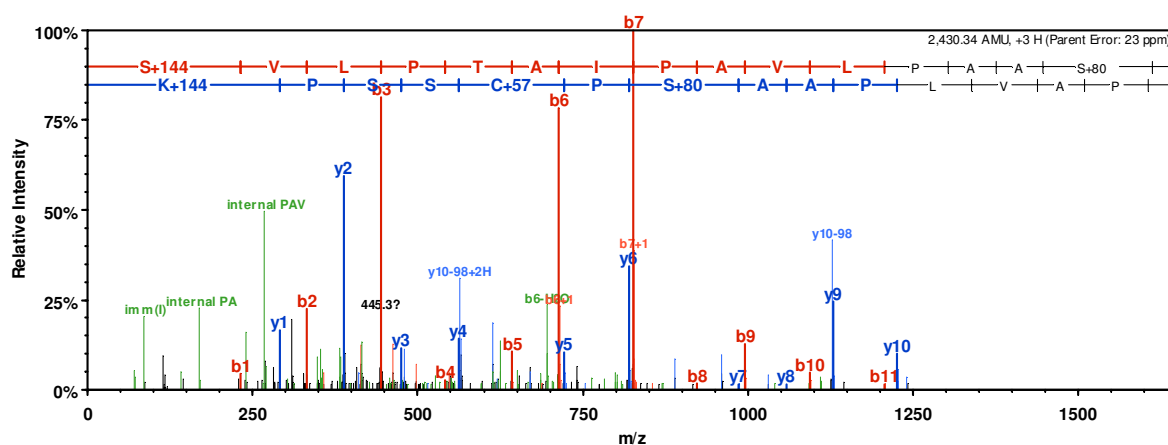

| B  | B Ions  | B+2H    | B-NH3   | B-H2O   | AA    | Y Ions  | Y+2H    | Y-NH3   | Y-H2O   | Y  |
|----|---------|---------|---------|---------|-------|---------|---------|---------|---------|----|
| 1  | 232.1   |         |         | 214.1   | S+144 | 2,431.3 | 1,216.1 | 2,414.3 | 2,413.3 | 21 |
| 2  | 331.2   |         |         | 313.2   | V     | 2,200.2 | 1,100.6 | 2,183.1 | 2,182.1 | 20 |
| 3  | 444.3   |         |         | 426.3   | L     | 2,101.1 | 1,051.0 | 2,084.1 | 2,083.1 | 19 |
| 4  | 541.3   |         |         | 523.3   | P     | 1,988.0 | 994.5   | 1,971.0 | 1,970.0 | 18 |
| 5  | 642.4   |         |         | 624.4   | T     | 1,891.0 | 946.0   | 1,873.9 | 1,872.9 | 17 |
| 6  | 713.4   | 357.2   |         | 695.4   | A     | 1,789.9 | 895.5   | 1,772.9 | 1,771.9 | 16 |
| 7  | 826.5   | 413.8   |         | 808.5   | I     | 1,718.9 | 859.9   | 1,701.8 | 1,700.9 | 15 |
| 8  | 923.6   | 462.3   |         | 905.6   | P     | 1,605.8 | 803.4   | 1,588.8 | 1,587.8 | 14 |
| 9  | 994.6   | 497.8   |         | 976.6   | A     | 1,508.7 | 754.9   | 1,491.7 | 1,490.7 | 13 |
| 10 | 1,093.7 | 547.3   |         | 1,075.7 | V     | 1,437.7 | 719.4   | 1,420.7 | 1,419.7 | 12 |
| 11 | 1,206.8 | 603.9   |         | 1,188.7 | L     | 1,338.6 | 669.8   | 1,321.6 | 1,320.6 | 11 |
| 12 | 1,303.8 | 652.4   |         | 1,285.8 | P     | 1,225.5 | 613.3   | 1,208.5 | 1,207.5 | 10 |
| 13 | 1,374.8 | 687.9   |         | 1,356.8 | A     | 1,128.5 | 564.7   | 1,111.5 | 1,110.5 | 9  |
| 14 | 1,445.9 | 723.4   |         | 1,427.9 | A     | 1,057.5 | 529.2   | 1,040.4 | 1,039.4 | 8  |
| 15 | 1,612.9 | 806.9   |         | 1,594.9 | S+80  | 986.4   | 493.7   | 969.4   | 968.4   | 7  |
| 16 | 1,709.9 | 855.5   |         | 1,691.9 | P     | 819.4   | 410.2   | 802.4   | 801.4   | 6  |
| 17 | 1,870.0 | 935.5   |         | 1,852.0 | C+57  | 722.4   |         | 705.3   | 704.4   | 5  |
| 18 | 1,957.0 | 979.0   |         | 1,939.0 | S     | 562.3   |         | 545.3   | 544.3   | 4  |
| 19 | 2,044.0 | 1,022.5 |         | 2,026.0 | S     | 475.3   |         | 458.3   | 457.3   | 3  |
| 20 | 2,141.1 | 1,071.0 |         | 2,123.1 | P     | 388.3   |         | 371.2   |         | 2  |
| 21 | 2,431.3 | 1,216.1 | 2,414.3 | 2,413.3 | K+144 | 291.2   |         | 274.2   |         | 1  |

# KPCD3\_HUMAN: TIpSPSTSNNIPLMR

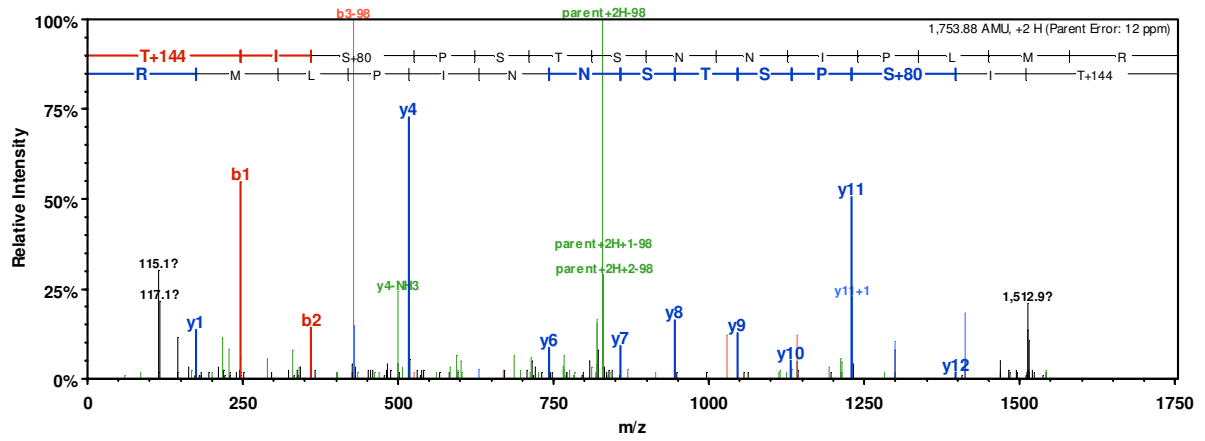

| B  | B Ions  | B+2H  | B-NH3   | B-H2O   | AA    | Y Ions  | Y+2H  | Y-NH3   | Y-H2O   | Y  |
|----|---------|-------|---------|---------|-------|---------|-------|---------|---------|----|
| 1  | 246.2   |       |         | 228.1   | T+144 | 1,754.9 | 877.9 | 1,737.8 | 1,736.9 | 14 |
| 2  | 359.2   |       |         | 341.2   | I     | 1,509.7 | 755.4 | 1,492.7 | 1,491.7 | 13 |
| 3  | 526.2   |       |         | 508.2   | S+80  | 1,396.6 | 698.8 | 1,379.6 | 1,378.6 | 12 |
| 4  | 623.3   |       |         | 605.3   | P     | 1,229.6 | 615.3 | 1,212.6 | 1,211.6 | 11 |
| 5  | 710.3   |       |         | 692.3   | S     | 1,132.6 | 566.8 | 1,115.6 | 1,114.6 | 10 |
| 6  | 811.4   | 406.2 |         | 793.4   | T     | 1,045.5 | 523.3 | 1,028.5 | 1,027.5 | 9  |
| 7  | 898.4   | 449.7 |         | 880.4   | S     | 944.5   | 472.8 | 927.5   | 926.5   | 8  |
| 8  | 1,012.4 | 506.7 | 995.4   | 994.4   | N     | 857.5   | 429.2 | 840.4   |         | 7  |
| 9  | 1,126.5 | 563.7 | 1,109.5 | 1,108.5 | N     | 743.4   | 372.2 | 726.4   |         | 6  |
| 10 | 1,239.6 | 620.3 | 1,222.5 | 1,221.6 | I     | 629.4   |       | 612.4   |         | 5  |
| 11 | 1,336.6 | 668.8 | 1,319.6 | 1,318.6 | P     | 516.3   |       | 499.3   |         | 4  |
| 12 | 1,449.7 | 725.4 | 1,432.7 | 1,431.7 | L     | 419.2   |       | 402.2   |         | 3  |
| 13 | 1,580.8 | 790.9 | 1,563.7 | 1,562.7 | M     | 306.2   |       | 289.1   |         | 2  |
| 14 | 1,754.9 | 877.9 | 1,737.8 | 1,736.9 | R     | 175.1   |       | 158.1   |         | 1  |



# LIMK1\_HUMAN: SPGAGSLGpSPASQR

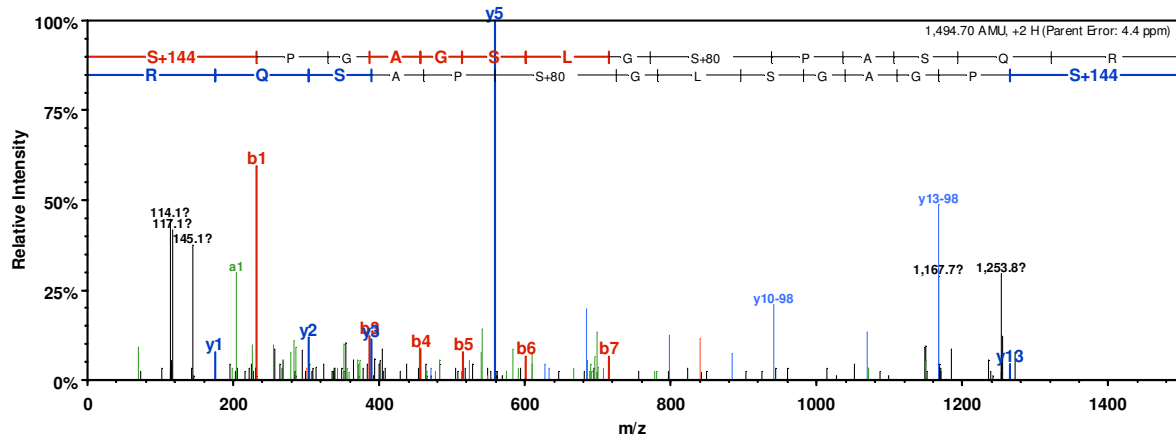

| B  | B Ions  | B+2H  | B-NH3   | B-H2O   | AA    | Y Ions  | Y+2H  | Y-NH3   | Y-H2O   | Y  |
|----|---------|-------|---------|---------|-------|---------|-------|---------|---------|----|
| 1  | 232.1   |       |         | 214.1   | S+144 | 1,495.7 | 748.4 | 1,478.7 | 1,477.7 | 14 |
| 2  | 329.2   |       |         | 311.2   | P     | 1,264.6 | 632.8 | 1,247.5 | 1,246.6 | 13 |
| 3  | 386.2   |       |         | 368.2   | G     | 1,167.5 | 584.3 | 1,150.5 | 1,149.5 | 12 |
| 4  | 457.3   |       |         | 439.2   | A     | 1,110.5 | 555.8 | 1,093.5 | 1,092.5 | 11 |
| 5  | 514.3   |       |         | 496.3   | G     | 1,039.5 | 520.2 | 1,022.4 | 1,021.4 | 10 |
| 6  | 601.3   | 301.2 |         | 583.3   | S     | 982.4   | 491.7 | 965.4   | 964.4   | 9  |
| 7  | 714.4   | 357.7 |         | 696.4   | L     | 895.4   | 448.2 | 878.4   | 877.4   | 8  |
| 8  | 771.4   | 386.2 |         | 753.4   | G     | 782.3   | 391.7 | 765.3   | 764.3   | 7  |
| 9  | 938.4   | 469.7 |         | 920.4   | S+80  | 725.3   | 363.2 | 708.3   | 707.3   | 6  |
| 10 | 1,035.5 | 518.2 |         | 1,017.5 | P     | 558.3   |       | 541.3   | 540.3   | 5  |
| 11 | 1,106.5 | 553.8 |         | 1,088.5 | A     | 461.2   |       | 444.2   | 443.2   | 4  |
| 12 | 1,193.5 | 597.3 |         | 1,175.5 | S     | 390.2   |       | 373.2   | 372.2   | 3  |
| 13 | 1,321.6 | 661.3 | 1,304.6 | 1,303.6 | Q     | 303.2   |       | 286.2   |         | 2  |
| 14 | 1,495.7 | 748.4 | 1,478.7 | 1,477.7 | R     | 175.1   |       | 158.1   |         | 1  |

LYN\_HUMAN: AEERTFDYLSVLDDDFYTATEGQpYQQQP

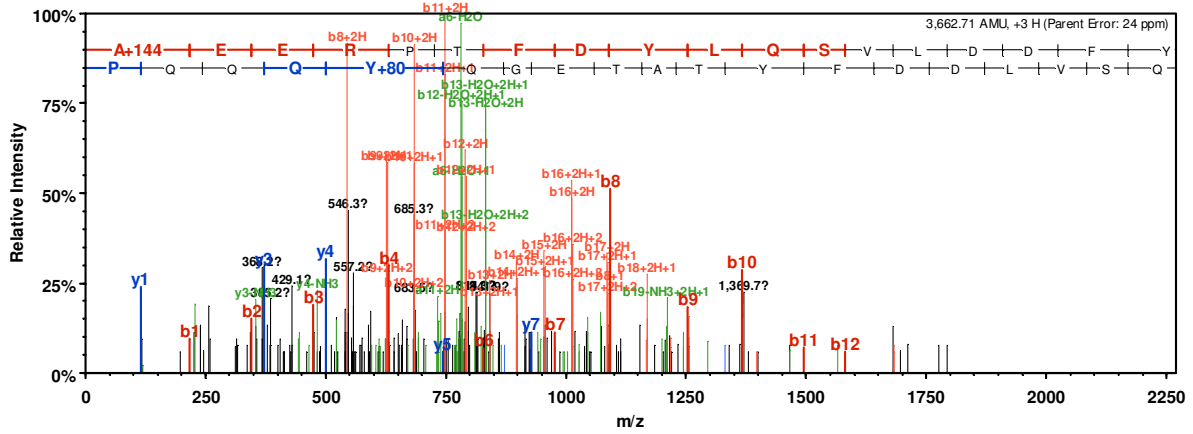

| B  | B Ions  | B+2H    | B-NH3   | B-H2O   | AA    | Y Ions  | Y+2H    | Y-NH3   | Y-H2O   | Y  |
|----|---------|---------|---------|---------|-------|---------|---------|---------|---------|----|
| 1  | 216.1   |         |         |         | A+144 | 3,663.6 | 1,832.3 | 3,646.6 | 3,645.6 | 29 |
| 2  | 345.2   |         |         | 327.2   | E     | 3,448.5 | 1,724.7 | 3,431.5 | 3,430.5 | 28 |
| 3  | 474.2   |         |         | 456.2   | E     | 3,319.4 | 1,660.2 | 3,302.4 | 3,301.4 | 27 |
| 4  | 630.3   | 315.7   | 613.3   | 612.3   | R     | 3,190.4 | 1,595.7 | 3,173.4 | 3,172.4 | 26 |
| 5  | 727.4   | 364.2   | 710.4   | 709.4   | P     | 3,034.3 |         | 3,017.3 | 3,016.3 | 25 |
| 6  | 828.4   | 414.7   | 811.4   | 810.4   | T     | 2,937.3 |         | 2,920.2 | 2,919.2 | 24 |
| 7  | 975.5   | 488.3   | 958.5   | 957.5   | F     | 2,836.2 |         | 2,819.2 | 2,818.2 | 23 |
| 8  | 1,090.5 | 545.8   | 1,073.5 | 1,072.5 | D     | 2,689.1 |         | 2,672.1 | 2,671.1 | 22 |
| 9  | 1,253.6 | 627.3   | 1,236.6 | 1,235.6 | Y     | 2,574.1 |         | 2,557.1 | 2,556.1 | 21 |
| 10 | 1,366.7 | 683.8   | 1,349.7 | 1,348.7 | L     | 2,411.0 |         | 2,394.0 | 2,393.0 | 20 |
| 11 | 1,494.7 | 747.9   | 1,477.7 | 1,476.7 | Q     | 2,298.0 |         | 2,280.9 | 2,280.0 | 19 |
| 12 | 1,581.8 | 791.4   | 1,564.7 | 1,563.8 | S     | 2,169.9 |         | 2,152.9 | 2,151.9 | 18 |
| 13 | 1,680.8 | 840.9   | 1,663.8 | 1,662.8 | V     | 2,082.9 |         | 2,065.8 | 2,064.9 | 17 |
| 14 | 1,793.9 | 897.5   | 1,776.9 | 1,775.9 | L     | 1,983.8 |         | 1,966.8 | 1,965.8 | 16 |
| 15 | 1,908.9 | 955.0   | 1,891.9 | 1,890.9 | D     | 1,870.7 |         | 1,853.7 | 1,852.7 | 15 |
| 16 | 2,024.0 | 1,012.5 | 2,006.9 | 2,006.0 | D     | 1,755.7 |         | 1,738.7 | 1,737.7 | 14 |
| 17 | 2,171.0 | 1,086.0 | 2,154.0 | 2,153.0 | F     | 1,640.7 |         | 1,623.6 | 1,622.7 | 13 |
| 18 | 2,334.1 | 1,167.6 | 2,317.1 | 2,316.1 | Y     | 1,493.6 |         | 1,476.6 | 1,475.6 | 12 |
| 19 | 2,435.2 | 1,218.1 | 2,418.1 | 2,417.1 | T     | 1,330.5 |         | 1,313.5 | 1,312.5 | 11 |
| 20 | 2,506.2 | 1,253.6 | 2,489.2 | 2,488.2 | A     | 1,229.5 |         | 1,212.5 | 1,211.5 | 10 |
| 21 | 2,607.2 | 1,304.1 | 2,590.2 | 2,589.2 | T     | 1,158.4 |         | 1,141.4 | 1,140.4 | 9  |
| 22 | 2,736.3 | 1,368.6 | 2,719.3 | 2,718.3 | E     | 1,057.4 |         | 1,040.4 | 1,039.4 | 8  |
| 23 | 2,793.3 | 1,397.2 | 2,776.3 | 2,775.3 | G     | 928.4   |         | 911.3   |         | 7  |
| 24 | 2,921.4 | 1,461.2 | 2,904.3 | 2,903.3 | Q     | 871.3   |         | 854.3   |         | 6  |
| 25 | 3,164.4 | 1,582.7 | 3,147.4 | 3,146.4 | Y+80  | 743.3   |         | 726.3   |         | 5  |
| 26 | 3,292.4 | 1,646.7 | 3,275.4 | 3,274.4 | Q     | 500.2   |         | 483.2   |         | 4  |
| 27 | 3,420.5 | 1,710.8 | 3,403.5 | 3,402.5 | Q     | 372.2   |         | 355.2   |         | 3  |
| 28 | 3,548.6 | 1,774.8 | 3,531.5 | 3,530.6 | Q     | 244.1   |         | 227.1   |         | 2  |
| 29 | 3,663.6 | 1,832.3 | 3,646.6 | 3,645.6 | P     | 116.1   |         |         |         | 1  |

# LYN\_HUMAN: DpSLSDDGVDLK

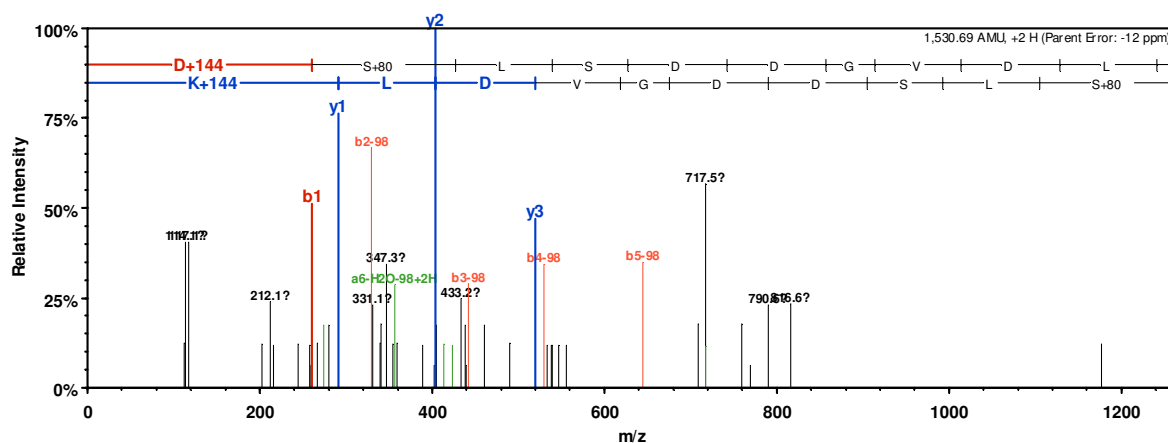

| B  | B Ions  | B+2H  | B-NH3   | B-H2O   | AA    | Y Ions  | Y+2H  | Y-NH3   | Y-H2O   | Y  |
|----|---------|-------|---------|---------|-------|---------|-------|---------|---------|----|
| 1  | 260.1   |       |         | 242.1   | D+144 | 1,531.7 | 766.4 | 1,514.7 | 1,513.7 | 11 |
| 2  | 427.1   |       |         | 409.1   | S+80  | 1,272.6 | 636.8 | 1,255.6 | 1,254.6 | 10 |
| 3  | 540.2   |       |         | 522.2   | L     | 1,105.6 | 553.3 | 1,088.6 | 1,087.6 | 9  |
| 4  | 627.3   |       |         | 609.2   | S     | 992.5   | 496.8 | 975.5   | 974.5   | 8  |
| 5  | 742.3   |       |         | 724.3   | D     | 905.5   | 453.2 | 888.4   | 887.5   | 7  |
| 6  | 857.3   | 429.2 |         | 839.3   | D     | 790.4   | 395.7 | 773.4   | 772.4   | 6  |
| 7  | 914.3   | 457.7 |         | 896.3   | G     | 675.4   |       | 658.4   | 657.4   | 5  |
| 8  | 1,013.4 | 507.2 |         | 995.4   | V     | 618.4   |       | 601.4   | 600.4   | 4  |
| 9  | 1,128.4 | 564.7 |         | 1,110.4 | D     | 519.3   |       | 502.3   | 501.3   | 3  |
| 10 | 1,241.5 | 621.3 |         | 1,223.5 | L     | 404.3   |       | 387.3   |         | 2  |
| 11 | 1,531.7 | 766.4 | 1,514.7 | 1,513.7 | K+144 | 291.2   |       | 274.2   |         | 1  |

# LYN\_HUMAN: DSLpSDDGVDLK

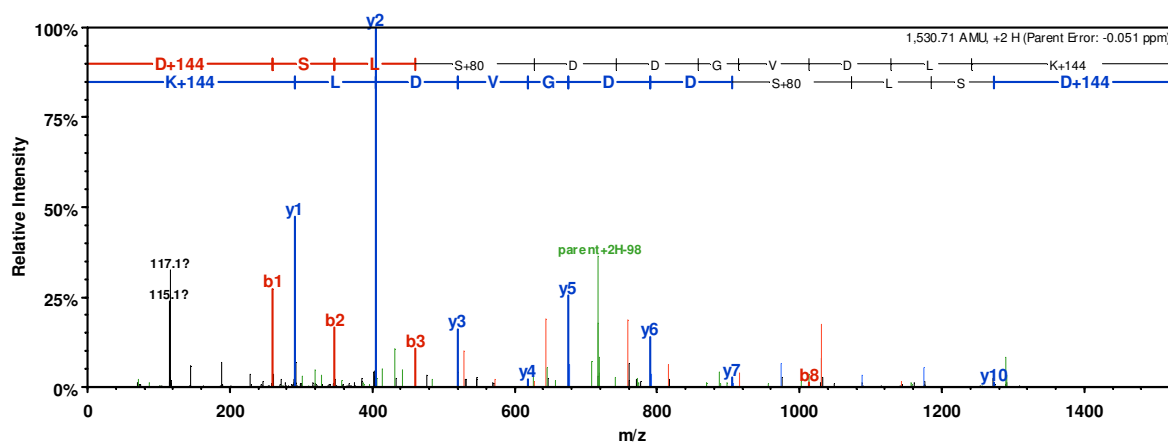

| B  | B Ions  | B+2H  | B-NH3   | B-H2O   | AA    | Y Ions  | Y+2H  | Y-NH3   | Y-H2O   | Y  |
|----|---------|-------|---------|---------|-------|---------|-------|---------|---------|----|
| 1  | 260.1   |       |         | 242.1   | D+144 | 1,531.7 | 766.4 | 1,514.7 | 1,513.7 | 11 |
| 2  | 347.2   |       |         | 329.2   | S     | 1,272.6 | 636.8 | 1,255.6 | 1,254.6 | 10 |
| 3  | 460.3   |       |         | 442.2   | L     | 1,185.6 | 593.3 | 1,168.5 | 1,167.5 | 9  |
| 4  | 627.3   |       |         | 609.2   | S+80  | 1,072.5 | 536.7 | 1,055.4 | 1,054.5 | 8  |
| 5  | 742.3   |       |         | 724.3   | D     | 905.5   | 453.2 | 888.4   | 887.5   | 7  |
| 6  | 857.3   | 429.2 |         | 839.3   | D     | 790.4   | 395.7 | 773.4   | 772.4   | 6  |
| 7  | 914.3   | 457.7 |         | 896.3   | G     | 675.4   |       | 658.4   | 657.4   | 5  |
| 8  | 1,013.4 | 507.2 |         | 995.4   | V     | 618.4   |       | 601.4   | 600.4   | 4  |
| 9  | 1,128.4 | 564.7 |         | 1,110.4 | D     | 519.3   |       | 502.3   | 501.3   | 3  |
| 10 | 1,241.5 | 621.3 |         | 1,223.5 | L     | 404.3   |       | 387.3   |         | 2  |
| 11 | 1,531.7 | 766.4 | 1,514.7 | 1,513.7 | K+144 | 291.2   |       | 274.2   |         | 1  |

# LYN\_HUMAN: SLDNGGYpYISPR

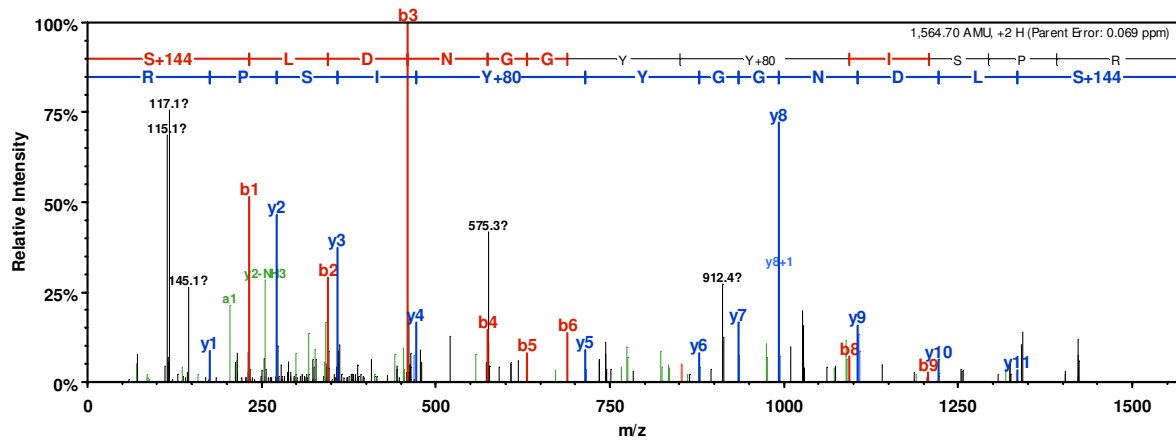

| B  | B Ions  | B+2H  | B-NH3   | B-H2O   | AA    | Y Ions  | Y+2H  | Y-NH3   | Y-H2O   | Y  |
|----|---------|-------|---------|---------|-------|---------|-------|---------|---------|----|
| 1  | 232.1   |       |         | 214.1   | S+144 | 1,565.7 | 783.4 | 1,548.7 | 1,547.7 | 12 |
| 2  | 345.2   |       |         | 327.2   | L     | 1,334.6 | 667.8 | 1,317.6 | 1,316.6 | 11 |
| 3  | 460.3   |       |         | 442.2   | D     | 1,221.5 | 611.3 | 1,204.5 | 1,203.5 | 10 |
| 4  | 574.3   |       | 557.3   | 556.3   | N     | 1,106.5 | 553.7 | 1,089.4 | 1,088.5 | 9  |
| 5  | 631.3   |       | 614.3   | 613.3   | G     | 992.4   | 496.7 | 975.4   | 974.4   | 8  |
| 6  | 688.3   | 344.7 | 671.3   | 670.3   | G     | 935.4   | 468.2 | 918.4   | 917.4   | 7  |
| 7  | 851.4   | 426.2 | 834.4   | 833.4   | Y     | 878.4   | 439.7 | 861.4   | 860.4   | 6  |
| 8  | 1,094.4 | 547.7 | 1,077.4 | 1,076.4 | Y+80  | 715.3   |       | 698.3   | 697.3   | 5  |
| 9  | 1,207.5 | 604.3 | 1,190.5 | 1,189.5 | I     | 472.3   |       | 455.3   | 454.3   | 4  |
| 10 | 1,294.5 | 647.8 | 1,277.5 | 1,276.5 | S     | 359.2   |       | 342.2   | 341.2   | 3  |
| 11 | 1,391.6 | 696.3 | 1,374.6 | 1,373.6 | P     | 272.2   |       | 255.1   |         | 2  |
| 12 | 1,565.7 | 783.4 | 1,548.7 | 1,547.7 | R     | 175.1   |       | 158.1   |         | 1  |

# LYN\_HUMAN: VIEDNEpYTAR

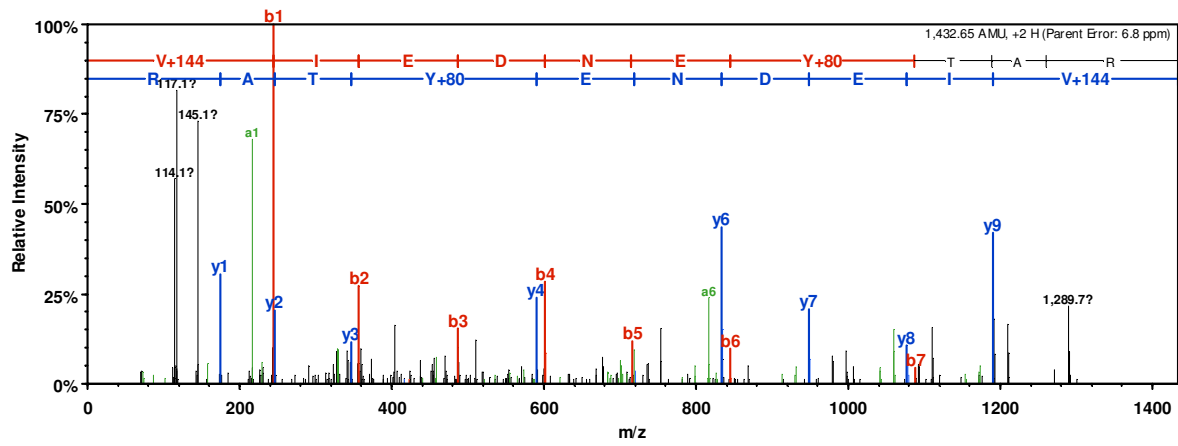

| B  | B Ions  | B+2H  | B-NH3   | B-H2O   | AA    | Y Ions  | Y+2H  | Y-NH3   | Y-H2O   | Y  |
|----|---------|-------|---------|---------|-------|---------|-------|---------|---------|----|
| 1  | 244.2   |       |         |         | V+144 | 1,433.6 | 717.3 | 1,416.6 | 1,415.6 | 10 |
| 2  | 357.3   |       |         |         | I     | 1,190.5 | 595.7 | 1,173.4 | 1,172.5 | 9  |
| 3  | 486.3   |       |         | 468.3   | E     | 1,077.4 | 539.2 | 1,060.4 | 1,059.4 | 8  |
| 4  | 601.3   |       |         | 583.3   | D     | 948.3   | 474.7 | 931.3   | 930.3   | 7  |
| 5  | 715.4   |       | 698.3   | 697.4   | N     | 833.3   | 417.2 | 816.3   | 815.3   | 6  |
| 6  | 844.4   | 422.7 | 827.4   | 826.4   | E     | 719.3   |       | 702.2   | 701.3   | 5  |
| 7  | 1,087.4 | 544.2 | 1,070.4 | 1,069.4 | Y+80  | 590.2   |       | 573.2   | 572.2   | 4  |
| 8  | 1,188.5 | 594.8 | 1,171.5 | 1,170.5 | T     | 347.2   |       | 330.2   | 329.2   | 3  |
| 9  | 1,259.5 | 630.3 | 1,242.5 | 1,241.5 | A     | 246.2   |       | 229.1   |         | 2  |
| 10 | 1,433.6 | 717.3 | 1,416.6 | 1,415.6 | R     | 175.1   |       | 158.1   |         | 1  |

# LYN\_HUMAN: VIEDNEYpTAR

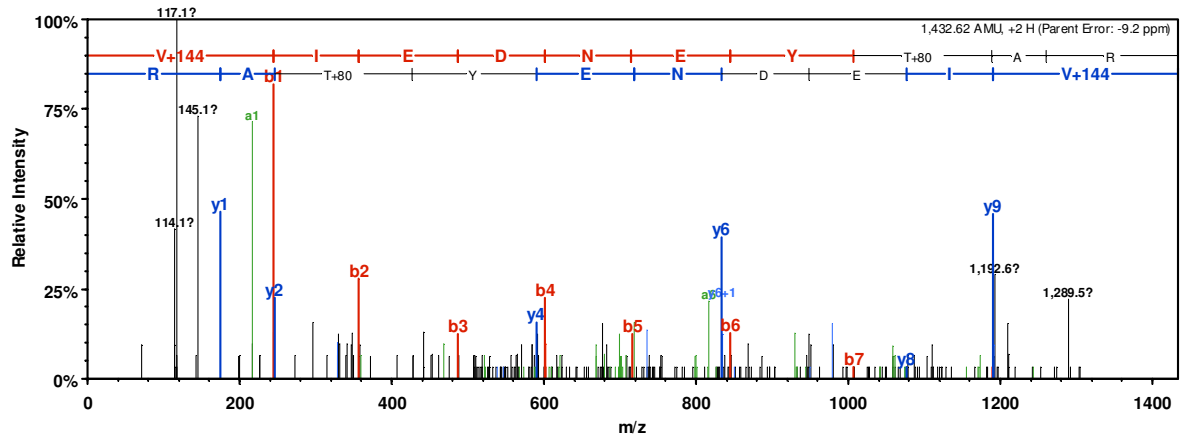

| B  | B Ions  | B+2H  | B-NH3   | B-H2O   | AA    | Y Ions  | Y+2H  | Y-NH3   | Y-H2O   | Y  |
|----|---------|-------|---------|---------|-------|---------|-------|---------|---------|----|
| 1  | 244.2   |       |         |         | V+144 | 1,433.6 | 717.3 | 1,416.6 | 1,415.6 | 10 |
| 2  | 357.3   |       |         |         | I     | 1,190.5 | 595.7 | 1,173.4 | 1,172.5 | 9  |
| 3  | 486.3   |       |         | 468.3   | E     | 1,077.4 | 539.2 | 1,060.4 | 1,059.4 | 8  |
| 4  | 601.3   |       |         | 583.3   | D     | 948.3   | 474.7 | 931.3   | 930.3   | 7  |
| 5  | 715.4   |       | 698.3   | 697.4   | N     | 833.3   | 417.2 | 816.3   | 815.3   | 6  |
| 6  | 844.4   | 422.7 | 827.4   | 826.4   | E     | 719.3   |       | 702.2   | 701.3   | 5  |
| 7  | 1,007.5 | 504.2 | 990.5   | 989.5   | Y     | 590.2   |       | 573.2   | 572.2   | 4  |
| 8  | 1,188.5 | 594.8 | 1,171.5 | 1,170.5 | T+80  | 427.2   |       | 410.1   | 409.2   | 3  |
| 9  | 1,259.5 | 630.3 | 1,242.5 | 1,241.5 | A     | 246.2   |       | 229.1   |         | 2  |
| 10 | 1,433.6 | 717.3 | 1,416.6 | 1,415.6 | R     | 175.1   |       | 158.1   |         | 1  |

# M3K11\_HUMAN: GGTVpSPPPGTSR

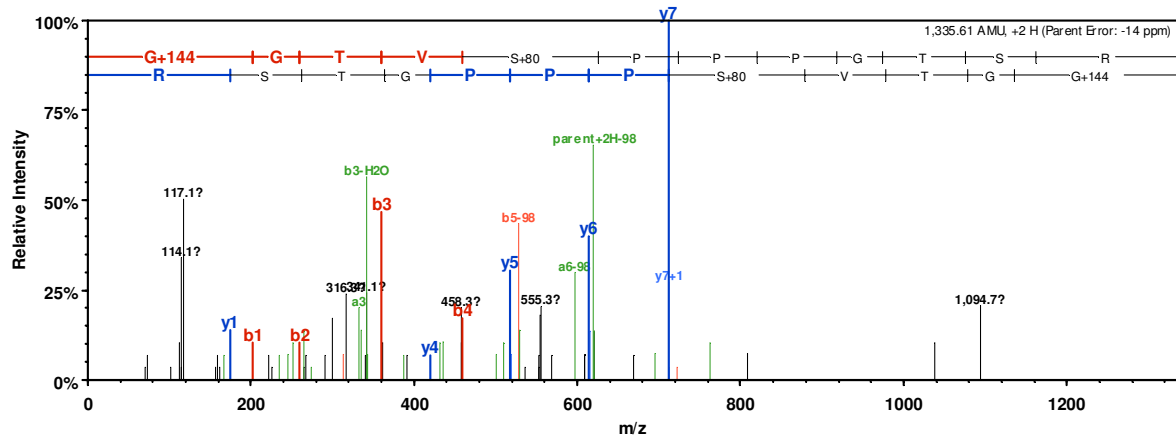

| B  | B Ions  | B+2H  | B-NH3   | B-H2O   | AA    | Y Ions  | Y+2H  | Y-NH3   | Y-H2O   | Y  |
|----|---------|-------|---------|---------|-------|---------|-------|---------|---------|----|
| 1  | 202.1   |       |         |         | G+144 | 1,336.6 | 668.8 | 1,319.6 | 1,318.6 | 12 |
| 2  | 259.2   |       |         |         | G     | 1,135.5 | 568.3 | 1,118.5 | 1,117.5 | 11 |
| 3  | 360.2   |       |         | 342.2   | T     | 1,078.5 | 539.8 | 1,061.5 | 1,060.5 | 10 |
| 4  | 459.3   |       |         | 441.3   | V     | 977.4   | 489.2 | 960.4   | 959.4   | 9  |
| 5  | 626.3   |       |         | 608.3   | S+80  | 878.4   | 439.7 | 861.4   | 860.4   | 8  |
| 6  | 723.3   | 362.2 |         | 705.3   | P     | 711.4   | 356.2 | 694.4   | 693.4   | 7  |
| 7  | 820.4   | 410.7 |         | 802.4   | P     | 614.3   | 307.7 | 597.3   | 596.3   | 6  |
| 8  | 917.4   | 459.2 |         | 899.4   | P     | 517.3   |       | 500.2   | 499.3   | 5  |
| 9  | 974.4   | 487.7 |         | 956.4   | G     | 420.2   |       | 403.2   | 402.2   | 4  |
| 10 | 1,075.5 | 538.3 |         | 1,057.5 | T     | 363.2   |       | 346.2   | 345.2   | 3  |
| 11 | 1,162.5 | 581.8 |         | 1,144.5 | S     | 262.2   |       | 245.1   | 244.1   | 2  |
| 12 | 1,336.6 | 668.8 | 1,319.6 | 1,318.6 | R     | 175.1   |       | 158.1   |         | 1  |



# M3K11\_HUMAN: ITVQApSPGLDR

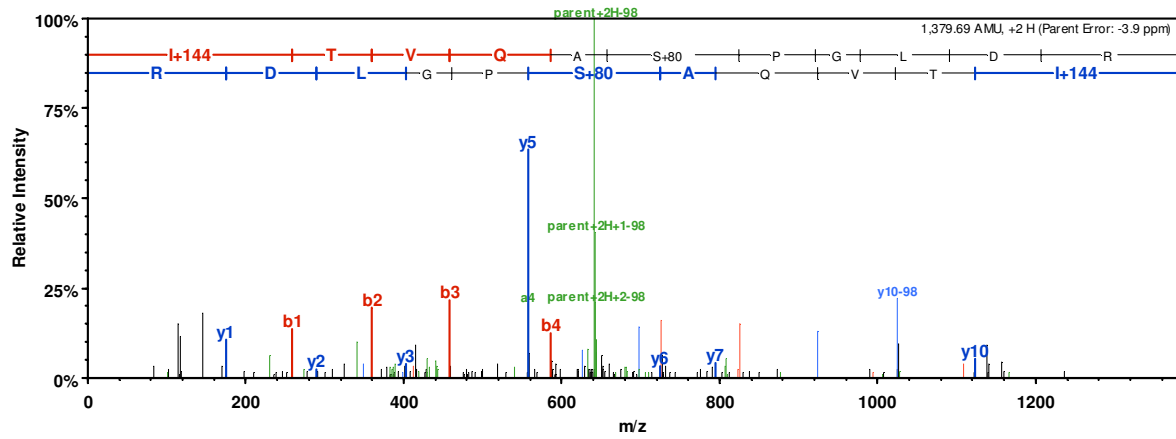

| B  | B Ions  | B+2H  | B-NH3   | B-H2O   | AA    | Y Ions  | Y+2H  | Y-NH3   | Y-H2O   | Y  |
|----|---------|-------|---------|---------|-------|---------|-------|---------|---------|----|
| 1  | 258.2   |       |         |         | I+144 | 1,380.7 | 690.9 | 1,363.7 | 1,362.7 | 11 |
| 2  | 359.2   |       |         | 341.2   | T     | 1,123.5 | 562.3 | 1,106.5 | 1,105.5 | 10 |
| 3  | 458.3   |       |         | 440.3   | V     | 1,022.5 | 511.7 | 1,005.4 | 1,004.5 | 9  |
| 4  | 586.4   |       | 569.3   | 568.4   | Q     | 923.4   | 462.2 | 906.4   | 905.4   | 8  |
| 5  | 657.4   |       | 640.4   | 639.4   | A     | 795.3   | 398.2 | 778.3   | 777.3   | 7  |
| 6  | 824.4   | 412.7 | 807.4   | 806.4   | S+80  | 724.3   | 362.7 | 707.3   | 706.3   | 6  |
| 7  | 921.5   | 461.2 | 904.4   | 903.4   | P     | 557.3   |       | 540.3   | 539.3   | 5  |
| 8  | 978.5   | 489.7 | 961.5   | 960.5   | G     | 460.3   |       | 443.2   | 442.2   | 4  |
| 9  | 1,091.6 | 546.3 | 1,074.5 | 1,073.6 | L     | 403.2   |       | 386.2   | 385.2   | 3  |
| 10 | 1,206.6 | 603.8 | 1,189.6 | 1,188.6 | D     | 290.1   |       | 273.1   | 272.1   | 2  |
| 11 | 1,380.7 | 690.9 | 1,363.7 | 1,362.7 | R     | 175.1   |       | 158.1   |         | 1  |

# M3K11\_HUMAN: NVFEVGPpSPTFPR

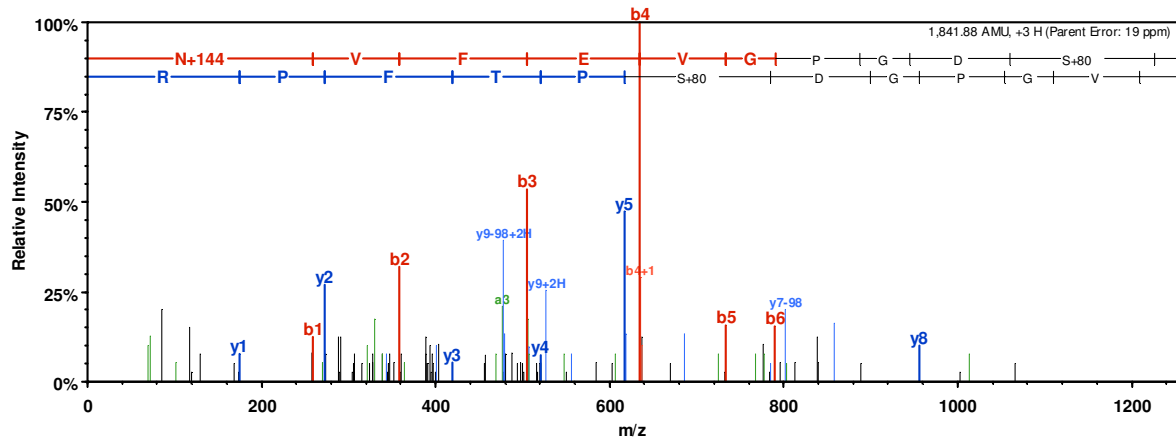

| B  | B Ions  | B+2H  | B-NH3   | B-H2O   | AA    | Y Ions  | Y+2H  | Y-NH3   | Y-H2O   | Y  |
|----|---------|-------|---------|---------|-------|---------|-------|---------|---------|----|
| 1  | 259.2   |       | 242.1   |         | N+144 | 1,842.9 | 921.9 | 1,825.8 | 1,824.8 | 15 |
| 2  | 358.2   |       | 341.2   |         | V     | 1,584.7 | 792.9 | 1,567.7 | 1,566.7 | 14 |
| 3  | 505.3   |       | 488.3   |         | F     | 1,485.6 | 743.3 | 1,468.6 | 1,467.6 | 13 |
| 4  | 634.3   |       | 617.3   | 616.3   | E     | 1,338.6 | 669.8 | 1,321.5 | 1,320.6 | 12 |
| 5  | 733.4   |       | 716.4   | 715.4   | V     | 1,209.5 | 605.3 | 1,192.5 | 1,191.5 | 11 |
| 6  | 790.4   | 395.7 | 773.4   | 772.4   | G     | 1,110.5 | 555.7 | 1,093.4 | 1,092.5 | 10 |
| 7  | 887.5   | 444.2 | 870.4   | 869.5   | P     | 1,053.4 | 527.2 | 1,036.4 | 1,035.4 | 9  |
| 8  | 944.5   | 472.8 | 927.5   | 926.5   | G     | 956.4   | 478.7 | 939.4   | 938.4   | 8  |
| 9  | 1,059.5 | 530.3 | 1,042.5 | 1,041.5 | D     | 899.4   | 450.2 | 882.3   | 881.4   | 7  |
| 10 | 1,226.5 | 613.8 | 1,209.5 | 1,208.5 | S+80  | 784.3   | 392.7 | 767.3   | 766.3   | 6  |
| 11 | 1,323.6 | 662.3 | 1,306.5 | 1,305.6 | P     | 617.3   |       | 600.3   | 599.3   | 5  |
| 12 | 1,424.6 | 712.8 | 1,407.6 | 1,406.6 | T     | 520.3   |       | 503.3   | 502.3   | 4  |
| 13 | 1,571.7 | 786.3 | 1,554.7 | 1,553.7 | F     | 419.2   |       | 402.2   |         | 3  |
| 14 | 1,668.7 | 834.9 | 1,651.7 | 1,650.7 | P     | 272.2   |       | 255.1   |         | 2  |
| 15 | 1,842.9 | 921.9 | 1,825.8 | 1,824.8 | R     | 175.1   |       | 158.1   |         | 1  |

# M3K2\_HUMAN: AQpSYPDNHQEFSDYDNPIFEK

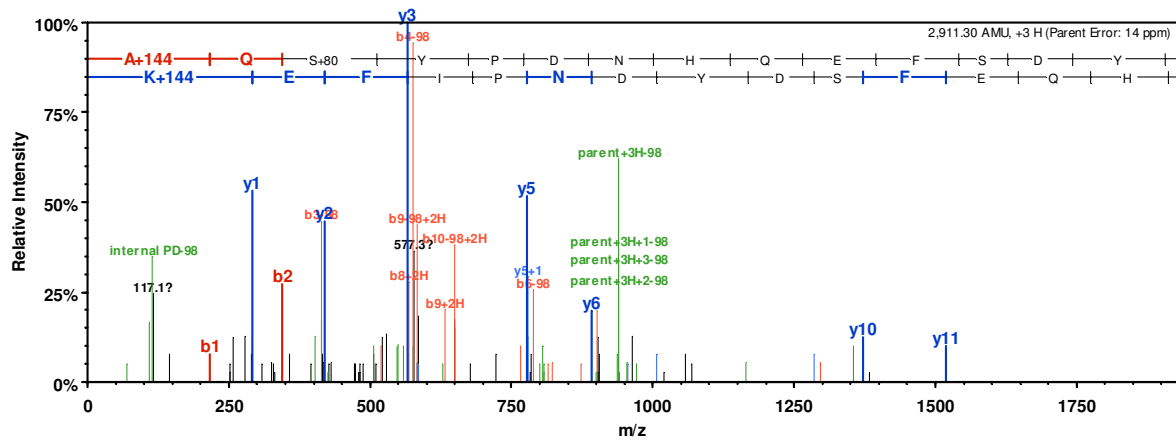

| B  | B Ions  | B+2H    | B-NH3   | B-H2O   | AA    | Y Ions  | Y+2H    | Y-NH3   | Y-H2O   | Y  |
|----|---------|---------|---------|---------|-------|---------|---------|---------|---------|----|
| 1  | 216.1   |         |         |         | A+144 | 2,912.3 | 1,456.6 | 2,895.2 | 2,894.3 | 21 |
| 2  | 344.2   |         | 327.2   |         | Q     | 2,697.1 | 1,349.1 | 2,680.1 | 2,679.1 | 20 |
| 3  | 511.2   |         | 494.2   | 493.2   | S+80  | 2,569.1 | 1,285.0 | 2,552.0 | 2,551.1 | 19 |
| 4  | 674.3   |         | 657.2   | 656.3   | Y     | 2,402.1 | 1,201.5 | 2,385.0 | 2,384.1 | 18 |
| 5  | 771.3   |         | 754.3   | 753.3   | P     | 2,239.0 | 1,120.0 | 2,222.0 | 2,221.0 | 17 |
| 6  | 886.3   | 443.7   | 869.3   | 868.3   | D     | 2,142.0 | 1,071.5 | 2,124.9 | 2,123.9 | 16 |
| 7  | 1,000.4 | 500.7   | 983.4   | 982.4   | N     | 2,026.9 | 1,014.0 | 2,009.9 | 2,008.9 | 15 |
| 8  | 1,137.4 | 569.2   | 1,120.4 | 1,119.4 | H     | 1,912.9 | 956.9   | 1,895.9 | 1,894.9 | 14 |
| 9  | 1,265.5 | 633.3   | 1,248.5 | 1,247.5 | Q     | 1,775.8 | 888.4   | 1,758.8 | 1,757.8 | 13 |
| 10 | 1,394.5 | 697.8   | 1,377.5 | 1,376.5 | E     | 1,647.8 | 824.4   | 1,630.7 | 1,629.8 | 12 |
| 11 | 1,541.6 | 771.3   | 1,524.6 | 1,523.6 | F     | 1,518.7 | 759.9   | 1,501.7 | 1,500.7 | 11 |
| 12 | 1,628.7 | 814.8   | 1,611.6 | 1,610.6 | S     | 1,371.7 | 686.3   | 1,354.6 | 1,353.6 | 10 |
| 13 | 1,743.7 | 872.3   | 1,726.7 | 1,725.7 | D     | 1,284.6 | 642.8   | 1,267.6 | 1,266.6 | 9  |
| 14 | 1,906.7 | 953.9   | 1,889.7 | 1,888.7 | Y     | 1,169.6 | 585.3   | 1,152.6 | 1,151.6 | 8  |
| 15 | 2,021.8 | 1,011.4 | 2,004.7 | 2,003.8 | D     | 1,006.5 | 503.8   | 989.5   | 988.5   | 7  |
| 16 | 2,135.8 | 1,068.4 | 2,118.8 | 2,117.8 | N     | 891.5   | 446.3   | 874.5   | 873.5   | 6  |
| 17 | 2,232.9 | 1,116.9 | 2,215.8 | 2,214.9 | P     | 777.5   |         | 760.4   | 759.5   | 5  |
| 18 | 2,345.9 | 1,173.5 | 2,328.9 | 2,327.9 | I     | 680.4   |         | 663.4   | 662.4   | 4  |
| 19 | 2,493.0 | 1,247.0 | 2,476.0 | 2,475.0 | F     | 567.3   |         | 550.3   | 549.3   | 3  |
| 20 | 2,622.1 | 1,311.5 | 2,605.0 | 2,604.0 | E     | 420.3   |         | 403.2   | 402.2   | 2  |
| 21 | 2,912.3 | 1,456.6 | 2,895.2 | 2,894.3 | K+144 | 291.2   |         | 274.2   |         | 1  |

# M3K2\_HUMAN: DRSpSPPPGYIPDELHQVAR

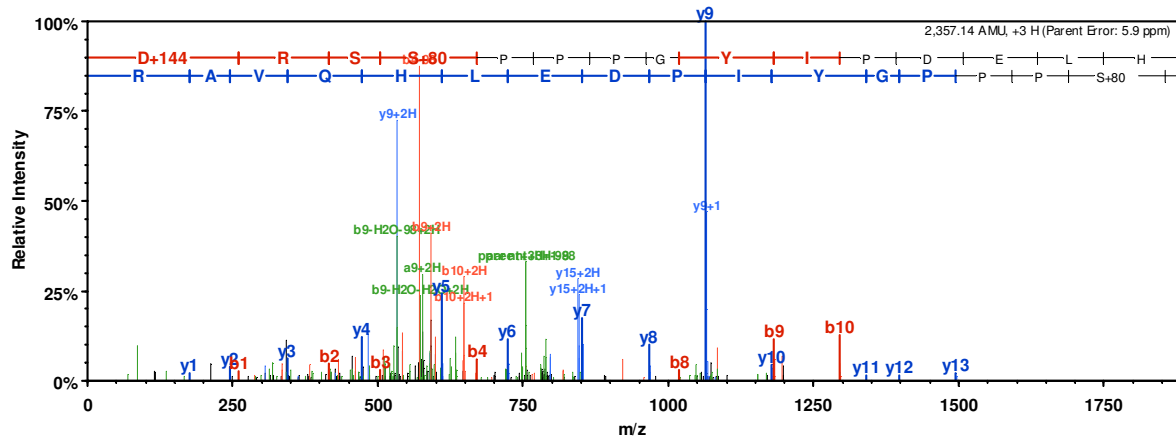

| B  | B Ions  | B+2H    | B-NH3   | B-H2O   | AA    | Y Ions  | Y+2H    | Y-NH3   | Y-H2O   | Y  |
|----|---------|---------|---------|---------|-------|---------|---------|---------|---------|----|
| 1  | 260.1   |         |         | 242.1   | D+144 | 2,358.1 | 1,179.6 | 2,341.1 | 2,340.1 | 19 |
| 2  | 416.2   | 208.6   | 399.2   | 398.2   | R     | 2,099.0 | 1,050.0 | 2,082.0 | 2,081.0 | 18 |
| 3  | 503.3   | 252.1   | 486.2   | 485.3   | S     | 1,942.9 | 972.0   | 1,925.9 | 1,924.9 | 17 |
| 4  | 670.3   | 335.6   | 653.2   | 652.3   | S+80  | 1,855.9 | 928.4   | 1,838.8 | 1,837.9 | 16 |
| 5  | 767.3   | 384.2   | 750.3   | 749.3   | P     | 1,688.9 | 844.9   | 1,671.9 | 1,670.9 | 15 |
| 6  | 864.4   | 432.7   | 847.3   | 846.4   | P     | 1,591.8 | 796.4   | 1,574.8 | 1,573.8 | 14 |
| 7  | 961.4   | 481.2   | 944.4   | 943.4   | P     | 1,494.8 | 747.9   | 1,477.7 | 1,476.8 | 13 |
| 8  | 1,018.4 | 509.7   | 1,001.4 | 1,000.4 | G     | 1,397.7 | 699.4   | 1,380.7 | 1,379.7 | 12 |
| 9  | 1,181.5 | 591.3   | 1,164.5 | 1,163.5 | Y     | 1,340.7 | 670.9   | 1,323.7 | 1,322.7 | 11 |
| 10 | 1,294.6 | 647.8   | 1,277.6 | 1,276.6 | I     | 1,177.6 | 589.3   | 1,160.6 | 1,159.6 | 10 |
| 11 | 1,391.6 | 696.3   | 1,374.6 | 1,373.6 | P     | 1,064.5 | 532.8   | 1,047.5 | 1,046.5 | 9  |
| 12 | 1,506.7 | 753.8   | 1,489.6 | 1,488.7 | D     | 967.5   | 484.3   | 950.5   | 949.5   | 8  |
| 13 | 1,635.7 | 818.4   | 1,618.7 | 1,617.7 | E     | 852.5   | 426.7   | 835.4   | 834.5   | 7  |
| 14 | 1,748.8 | 874.9   | 1,731.8 | 1,730.8 | L     | 723.4   | 362.2   | 706.4   |         | 6  |
| 15 | 1,885.9 | 943.4   | 1,868.8 | 1,867.9 | H     | 610.3   | 305.7   | 593.3   |         | 5  |
| 16 | 2,013.9 | 1,007.5 | 1,996.9 | 1,995.9 | Q     | 473.3   |         | 456.3   |         | 4  |
| 17 | 2,113.0 | 1,057.0 | 2,096.0 | 2,095.0 | V     | 345.2   |         | 328.2   |         | 3  |
| 18 | 2,184.0 | 1,092.5 | 2,167.0 | 2,166.0 | A     | 246.2   |         | 229.1   |         | 2  |
| 19 | 2,358.1 | 1,179.6 | 2,341.1 | 2,340.1 | R     | 175.1   |         | 158.1   |         | 1  |

# M3K2\_HUMAN: RLpSIIGPTSR

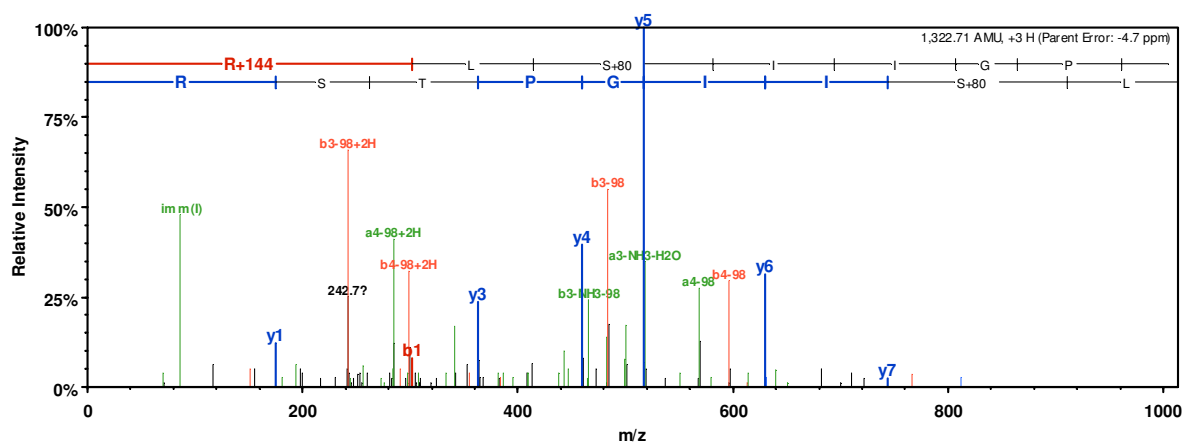

| B  | B Ions  | B+2H  | B-NH3   | B-H2O   | AA    | Y Ions  | Y+2H  | Y-NH3   | Y-H2O   | Y  |
|----|---------|-------|---------|---------|-------|---------|-------|---------|---------|----|
| 1  | 301.2   | 151.1 | 284.2   |         | R+144 | 1,323.7 | 662.4 | 1,306.7 | 1,305.7 | 10 |
| 2  | 414.3   | 207.7 | 397.3   |         | L     | 1,023.5 | 512.3 | 1,006.5 | 1,005.5 | 9  |
| 3  | 581.3   | 291.2 | 564.3   | 563.3   | S+80  | 910.4   | 455.7 | 893.4   | 892.4   | 8  |
| 4  | 694.4   | 347.7 | 677.4   | 676.4   | I     | 743.4   | 372.2 | 726.4   | 725.4   | 7  |
| 5  | 807.5   | 404.2 | 790.4   | 789.5   | I     | 630.4   | 315.7 | 613.3   | 612.3   | 6  |
| 6  | 864.5   | 432.7 | 847.5   | 846.5   | G     | 517.3   |       | 500.2   | 499.3   | 5  |
| 7  | 961.5   | 481.3 | 944.5   | 943.5   | P     | 460.3   |       | 443.2   | 442.2   | 4  |
| 8  | 1,062.6 | 531.8 | 1,045.6 | 1,044.6 | T     | 363.2   |       | 346.2   | 345.2   | 3  |
| 9  | 1,149.6 | 575.3 | 1,132.6 | 1,131.6 | S     | 262.2   |       | 245.1   | 244.1   | 2  |
| 10 | 1,323.7 | 662.4 | 1,306.7 | 1,305.7 | R     | 175.1   |       | 158.1   |         | 1  |

# M4K3\_HUMAN: TRpSEITFGQVK

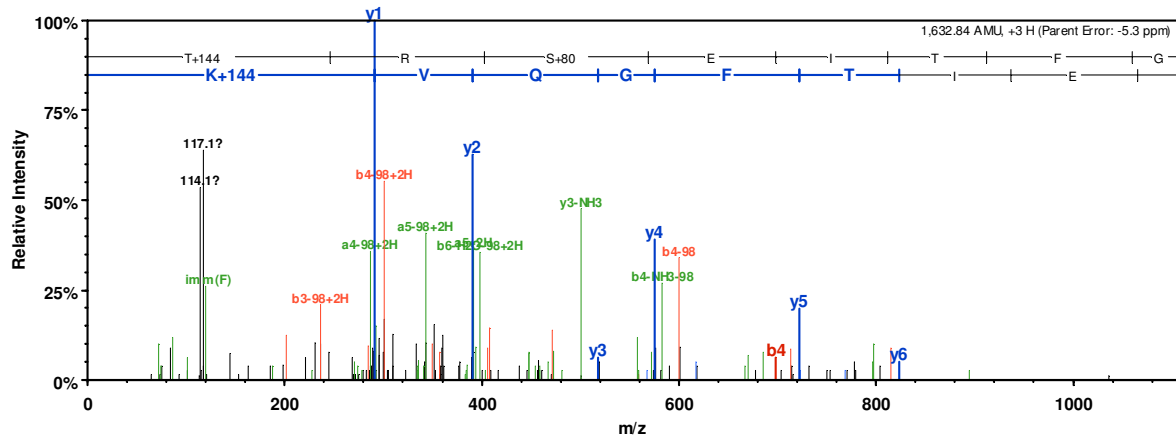

| B  | B Ions  | B+2H  | B-NH3   | B-H2O   | AA    | Y Ions  | Y+2H  | Y-NH3   | Y-H2O   | Y  |
|----|---------|-------|---------|---------|-------|---------|-------|---------|---------|----|
| 1  | 246.2   |       |         | 228.1   | T+144 | 1,633.9 | 817.4 | 1,616.8 | 1,615.8 | 11 |
| 2  | 402.3   | 201.6 | 385.2   | 384.2   | R     | 1,388.7 | 694.9 | 1,371.7 | 1,370.7 | 10 |
| 3  | 569.3   | 285.1 | 552.2   | 551.2   | S+80  | 1,232.6 | 616.8 | 1,215.6 | 1,214.6 | 9  |
| 4  | 698.3   | 349.7 | 681.3   | 680.3   | E     | 1,065.6 | 533.3 | 1,048.6 | 1,047.6 | 8  |
| 5  | 811.4   | 406.2 | 794.4   | 793.4   | I     | 936.6   | 468.8 | 919.5   | 918.6   | 7  |
| 6  | 912.4   | 456.7 | 895.4   | 894.4   | T     | 823.5   | 412.2 | 806.5   | 805.5   | 6  |
| 7  | 1,059.5 | 530.3 | 1,042.5 | 1,041.5 | F     | 722.4   |       | 705.4   |         | 5  |
| 8  | 1,116.5 | 558.8 | 1,099.5 | 1,098.5 | G     | 575.4   |       | 558.3   |         | 4  |
| 9  | 1,244.6 | 622.8 | 1,227.6 | 1,226.6 | Q     | 518.3   |       | 501.3   |         | 3  |
| 10 | 1,343.6 | 672.3 | 1,326.6 | 1,325.6 | V     | 390.3   |       | 373.3   |         | 2  |
| 11 | 1,633.9 | 817.4 | 1,616.8 | 1,615.8 | K+144 | 291.2   |       | 274.2   |         | 1  |

# MARK1\_HUMAN: SIpSANQK

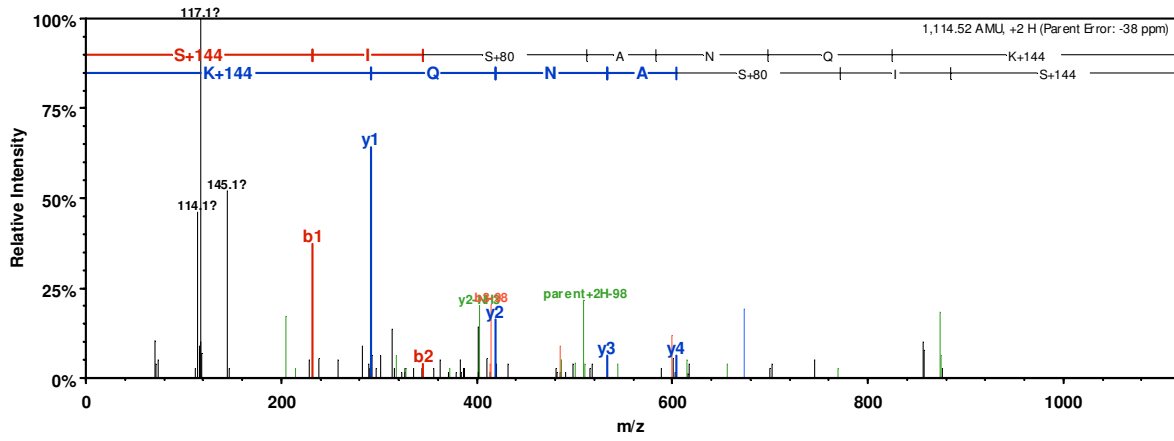

| B | B Ions  | B+2H  | B-NH3   | B-H2O   | AA    | Y Ions  | Y+2H  | Y-NH3   | Y-H2O   | Y |
|---|---------|-------|---------|---------|-------|---------|-------|---------|---------|---|
| 1 | 232.1   |       |         | 214.1   | S+144 | 1,115.6 | 558.3 | 1,098.5 | 1,097.6 | 7 |
| 2 | 345.2   |       |         | 327.2   | I     | 884.4   | 442.7 | 867.4   | 866.4   | 6 |
| 3 | 512.2   |       |         | 494.2   | S+80  | 771.4   |       | 754.3   | 753.3   | 5 |
| 4 | 583.3   |       |         | 565.3   | A     | 604.4   |       | 587.3   |         | 4 |
| 5 | 697.3   |       | 680.3   | 679.3   | N     | 533.3   |       | 516.3   |         | 3 |
| 6 | 825.4   | 413.2 | 808.3   | 807.4   | Q     | 419.3   |       | 402.2   |         | 2 |
| 7 | 1,115.6 | 558.3 | 1,098.5 | 1,097.6 | K+144 | 291.2   |       | 274.2   |         | 1 |

# MARK1\_HUMAN: VPAApSPSAHSISTATPDR

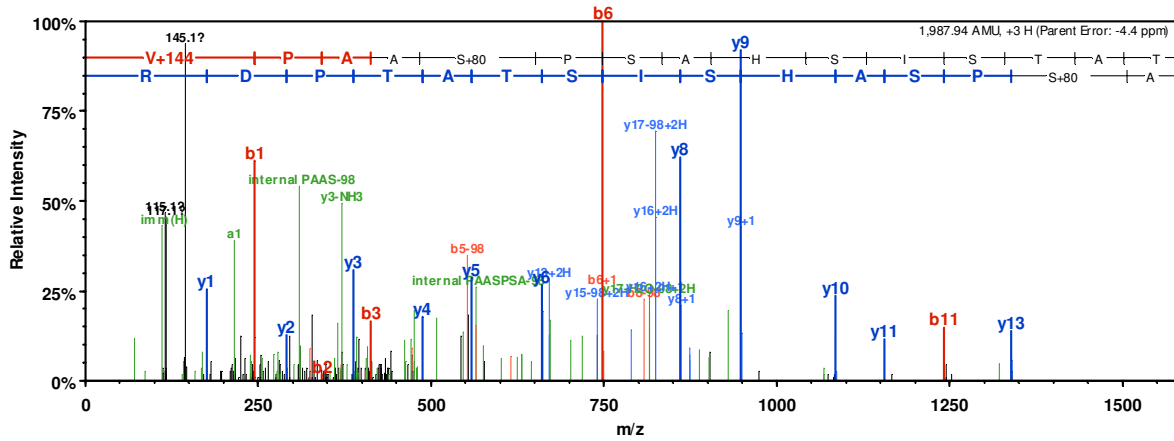

| B  | B Ions  | B+2H  | B-NH3   | B-H2O   | AA    | Y Ions  | Y+2H  | Y-NH3   | Y-H2O   | Y  |
|----|---------|-------|---------|---------|-------|---------|-------|---------|---------|----|
| 1  | 244.2   |       |         |         | V+144 | 1,989.0 | 995.0 | 1,971.9 | 1,970.9 | 18 |
| 2  | 341.2   |       |         |         | P     | 1,745.8 | 873.4 | 1,728.8 | 1,727.8 | 17 |
| 3  | 412.3   |       |         |         | A     | 1,648.7 | 824.9 | 1,631.7 | 1,630.7 | 16 |
| 4  | 483.3   |       |         |         | A     | 1,577.7 | 789.4 | 1,560.7 | 1,559.7 | 15 |
| 5  | 650.3   |       |         | 632.3   | S+80  | 1,506.7 | 753.8 | 1,489.6 | 1,488.6 | 14 |
| 6  | 747.4   | 374.2 |         | 729.3   | P     | 1,339.7 | 670.3 | 1,322.6 | 1,321.7 | 13 |
| 7  | 834.4   | 417.7 |         | 816.4   | S     | 1,242.6 | 621.8 | 1,225.6 | 1,224.6 | 12 |
| 8  | 905.4   | 453.2 |         | 887.4   | A     | 1,155.6 | 578.3 | 1,138.5 | 1,137.6 | 11 |
| 9  | 1,042.5 | 521.7 |         | 1,024.5 | H     | 1,084.5 | 542.8 | 1,067.5 | 1,066.5 | 10 |
| 10 | 1,129.5 | 565.3 |         | 1,111.5 | S     | 947.5   | 474.2 | 930.5   | 929.5   | 9  |
| 11 | 1,242.6 | 621.8 |         | 1,224.6 | I     | 860.4   | 430.7 | 843.4   | 842.4   | 8  |
| 12 | 1,329.6 | 665.3 |         | 1,311.6 | S     | 747.4   | 374.2 | 730.3   | 729.4   | 7  |
| 13 | 1,430.7 | 715.8 |         | 1,412.7 | T     | 660.3   | 330.7 | 643.3   | 642.3   | 6  |
| 14 | 1,501.7 | 751.4 |         | 1,483.7 | A     | 559.3   |       | 542.3   | 541.3   | 5  |
| 15 | 1,602.8 | 801.9 |         | 1,584.8 | T     | 488.2   |       | 471.2   | 470.2   | 4  |
| 16 | 1,699.8 | 850.4 |         | 1,681.8 | P     | 387.2   |       | 370.2   | 369.2   | 3  |
| 17 | 1,814.8 | 907.9 |         | 1,796.8 | D     | 290.1   |       | 273.1   | 272.1   | 2  |
| 18 | 1,989.0 | 995.0 | 1,971.9 | 1,970.9 | R     | 175.1   |       | 158.1   |         | 1  |



# MARK2\_HUMAN: pSRNSPLLER

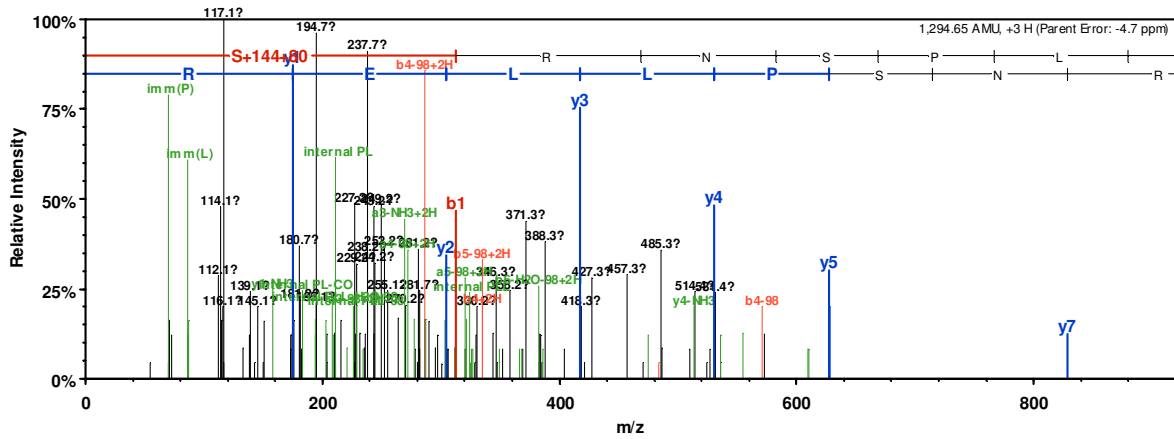

| B | B Ions  | B+2H  | B-NH3   | B-H2O   | AA    | Y Ions  | Y+2H  | Y-NH3   | Y-H2O   | Y |
|---|---------|-------|---------|---------|-------|---------|-------|---------|---------|---|
| 1 | 312.1   |       |         | 294.1   | S+224 | 1,295.7 | 648.3 | 1,278.6 | 1,277.6 | 9 |
| 2 | 468.2   | 234.6 | 451.2   | 450.2   | R     | 984.6   | 492.8 | 967.5   | 966.5   | 8 |
| 3 | 582.3   | 291.6 | 565.2   | 564.2   | N     | 828.5   | 414.7 | 811.4   | 810.4   | 7 |
| 4 | 669.3   | 335.1 | 652.3   | 651.3   | S     | 714.4   | 357.7 | 697.4   | 696.4   | 6 |
| 5 | 766.3   | 383.7 | 749.3   | 748.3   | P     | 627.4   |       | 610.4   | 609.4   | 5 |
| 6 | 879.4   | 440.2 | 862.4   | 861.4   | L     | 530.3   |       | 513.3   | 512.3   | 4 |
| 7 | 992.5   | 496.8 | 975.5   | 974.5   | L     | 417.2   |       | 400.2   | 399.2   | 3 |
| 8 | 1,121.5 | 561.3 | 1,104.5 | 1,103.5 | E     | 304.2   |       | 287.1   | 286.2   | 2 |
| 9 | 1,295.7 | 648.3 | 1,278.6 | 1,277.6 | R     | 175.1   |       | 158.1   |         | 1 |

# MARK2\_HUMAN: SVpSANPK

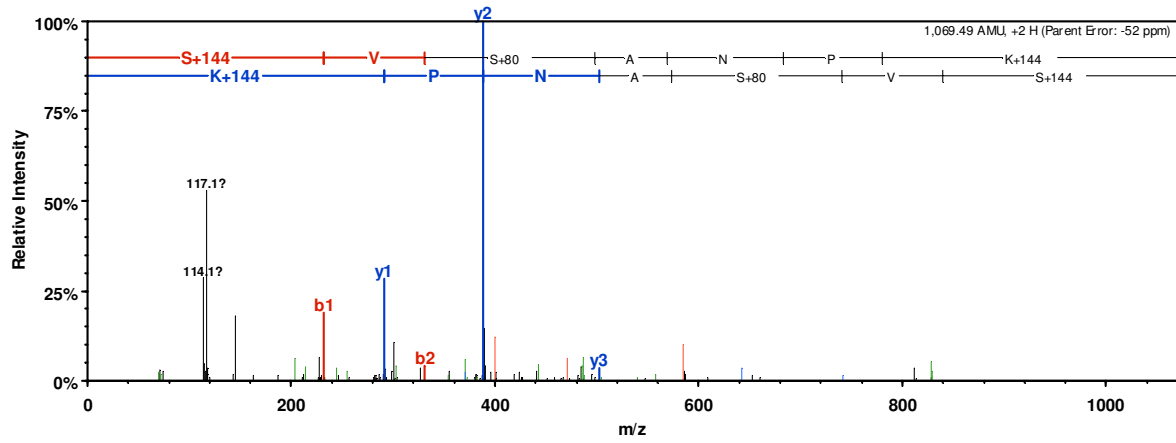

| B | B Ions  | B+2H  | B-NH3   | B-H2O   | AA    | Y Ions  | Y+2H  | Y-NH3   | Y-H2O   | Y |
|---|---------|-------|---------|---------|-------|---------|-------|---------|---------|---|
| 1 | 232.1   |       |         | 214.1   | S+144 | 1,070.5 | 535.8 | 1,053.5 | 1,052.5 | 7 |
| 2 | 331.2   |       |         | 313.2   | V     | 839.4   | 420.2 | 822.4   | 821.4   | 6 |
| 3 | 498.2   |       |         | 480.2   | S+80  | 740.3   |       | 723.3   | 722.3   | 5 |
| 4 | 569.2   |       |         | 551.2   | A     | 573.3   |       | 556.3   |         | 4 |
| 5 | 683.3   |       | 666.3   | 665.3   | N     | 502.3   |       | 485.3   |         | 3 |
| 6 | 780.3   | 390.7 | 763.3   | 762.3   | P     | 388.3   |       | 371.2   |         | 2 |
| 7 | 1,070.5 | 535.8 | 1,053.5 | 1,052.5 | K+144 | 291.2   |       | 274.2   |         | 1 |

# MARK2\_HUMAN: VPAP<sup>S</sup>PLPGLER

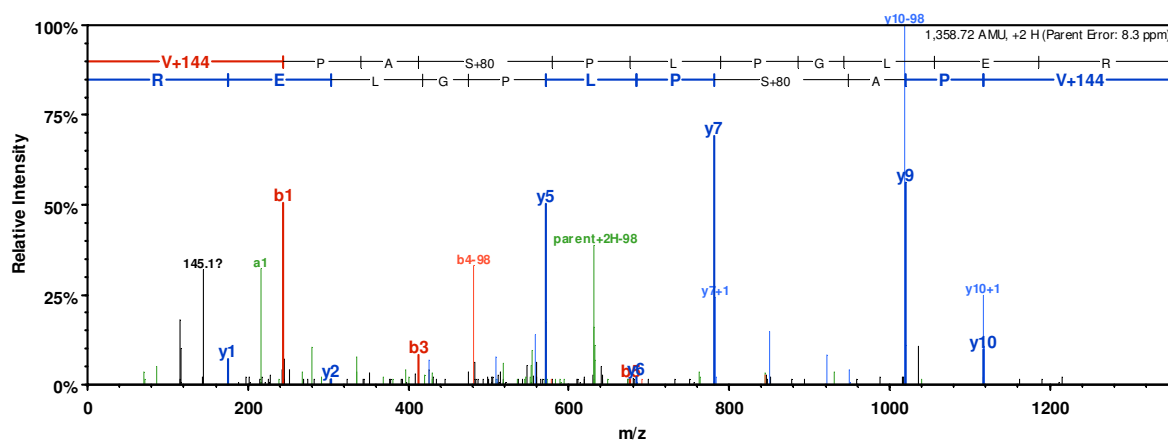

| B  | B Ions  | B+2H  | B-NH3   | B-H2O   | AA    | Y Ions  | Y+2H  | Y-NH3   | Y-H2O   | Y  |
|----|---------|-------|---------|---------|-------|---------|-------|---------|---------|----|
| 1  | 244.2   |       |         |         | V+144 | 1,359.7 | 680.4 | 1,342.7 | 1,341.7 | 11 |
| 2  | 341.2   |       |         |         | P     | 1,116.5 | 558.8 | 1,099.5 | 1,098.5 | 10 |
| 3  | 412.3   |       |         |         | A     | 1,019.5 | 510.3 | 1,002.5 | 1,001.5 | 9  |
| 4  | 579.3   |       |         | 561.3   | S+80  | 948.5   | 474.7 | 931.4   | 930.4   | 8  |
| 5  | 676.3   |       |         | 658.3   | P     | 781.5   | 391.2 | 764.4   | 763.4   | 7  |
| 6  | 789.4   | 395.2 |         | 771.4   | L     | 684.4   | 342.7 | 667.4   | 666.4   | 6  |
| 7  | 886.5   | 443.7 |         | 868.4   | P     | 571.3   |       | 554.3   | 553.3   | 5  |
| 8  | 943.5   | 472.2 |         | 925.5   | G     | 474.3   |       | 457.2   | 456.3   | 4  |
| 9  | 1,056.6 | 528.8 |         | 1,038.6 | L     | 417.2   |       | 400.2   | 399.2   | 3  |
| 10 | 1,185.6 | 593.3 |         | 1,167.6 | E     | 304.2   |       | 287.1   | 286.2   | 2  |
| 11 | 1,359.7 | 680.4 | 1,342.7 | 1,341.7 | R     | 175.1   |       | 158.1   |         | 1  |

# MARK2\_HUMAN: VPVAspSAHNISSSGGAPDR

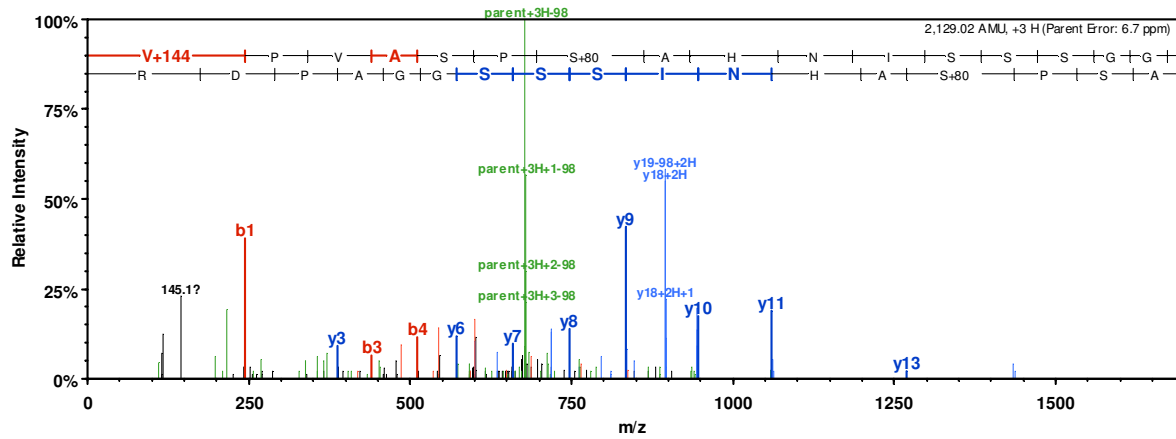

| B  | B Ions  | B+2H    | B-NH3   | B-H2O   | AA    | Y Ions  | Y+2H    | Y-NH3   | Y-H2O   | Y  |
|----|---------|---------|---------|---------|-------|---------|---------|---------|---------|----|
| 1  | 244.2   |         |         |         | V+144 | 2,130.0 | 1,065.5 | 2,113.0 | 2,112.0 | 20 |
| 2  | 341.2   |         |         |         | P     | 1,886.8 | 943.9   | 1,869.8 | 1,868.8 | 19 |
| 3  | 440.3   |         |         |         | V     | 1,789.8 | 895.4   | 1,772.8 | 1,771.8 | 18 |
| 4  | 511.3   |         |         |         | A     | 1,690.7 | 845.9   | 1,673.7 | 1,672.7 | 17 |
| 5  | 598.4   |         |         | 580.4   | S     | 1,619.7 | 810.3   | 1,602.7 | 1,601.7 | 16 |
| 6  | 695.4   | 348.2   |         | 677.4   | P     | 1,532.6 | 766.8   | 1,515.6 | 1,514.6 | 15 |
| 7  | 862.4   | 431.7   |         | 844.4   | S+80  | 1,435.6 | 718.3   | 1,418.6 | 1,417.6 | 14 |
| 8  | 933.5   | 467.2   |         | 915.4   | A     | 1,268.6 | 634.8   | 1,251.6 | 1,250.6 | 13 |
| 9  | 1,070.5 | 535.8   |         | 1,052.5 | H     | 1,197.6 | 599.3   | 1,180.5 | 1,179.6 | 12 |
| 10 | 1,184.6 | 592.8   | 1,167.5 | 1,166.5 | N     | 1,060.5 | 530.8   | 1,043.5 | 1,042.5 | 11 |
| 11 | 1,297.6 | 649.3   | 1,280.6 | 1,279.6 | I     | 946.5   | 473.7   | 929.4   | 928.4   | 10 |
| 12 | 1,384.7 | 692.8   | 1,367.6 | 1,366.7 | S     | 833.4   | 417.2   | 816.3   | 815.4   | 9  |
| 13 | 1,471.7 | 736.4   | 1,454.7 | 1,453.7 | S     | 746.3   | 373.7   | 729.3   | 728.3   | 8  |
| 14 | 1,558.7 | 779.9   | 1,541.7 | 1,540.7 | S     | 659.3   | 330.2   | 642.3   | 641.3   | 7  |
| 15 | 1,615.8 | 808.4   | 1,598.7 | 1,597.7 | G     | 572.3   | 286.6   | 555.3   | 554.3   | 6  |
| 16 | 1,672.8 | 836.9   | 1,655.8 | 1,654.8 | G     | 515.3   |         | 498.2   | 497.2   | 5  |
| 17 | 1,743.8 | 872.4   | 1,726.8 | 1,725.8 | A     | 458.2   |         | 441.2   | 440.2   | 4  |
| 18 | 1,840.9 | 920.9   | 1,823.8 | 1,822.9 | P     | 387.2   |         | 370.2   | 369.2   | 3  |
| 19 | 1,955.9 | 978.5   | 1,938.9 | 1,937.9 | D     | 290.1   |         | 273.1   | 272.1   | 2  |
| 20 | 2,130.0 | 1,065.5 | 2,113.0 | 2,112.0 | R     | 175.1   |         | 158.1   |         | 1  |

# MARK3\_HUMAN: TPVApSTHSISSAATPDR

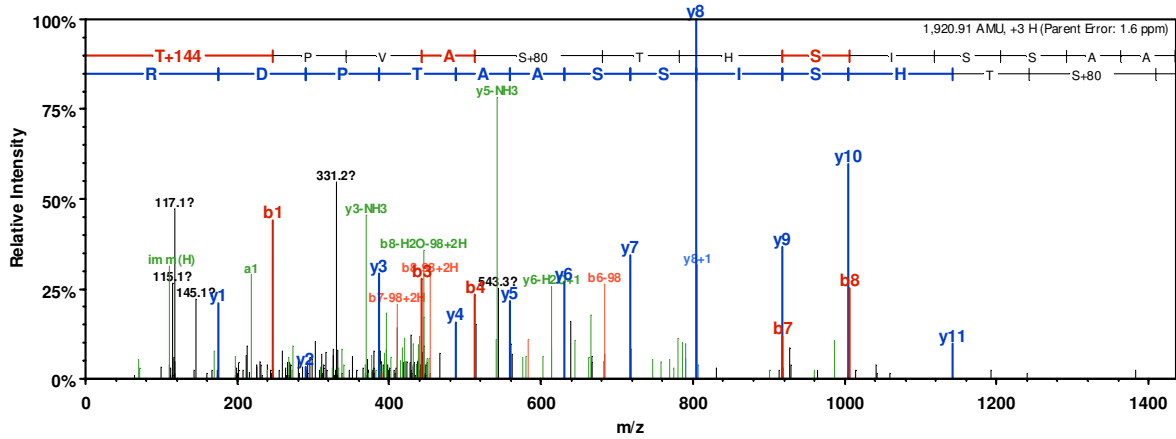

| B  | B Ions  | B+2H  | B-NH3   | B-H2O   | AA    | Y Ions  | Y+2H  | Y-NH3   | Y-H2O   | Y  |
|----|---------|-------|---------|---------|-------|---------|-------|---------|---------|----|
| 1  | 246.2   |       |         | 228.1   | T+144 | 1,921.9 | 961.5 | 1,904.9 | 1,903.9 | 17 |
| 2  | 343.2   |       |         | 325.2   | P     | 1,676.8 | 838.9 | 1,659.7 | 1,658.8 | 16 |
| 3  | 442.3   |       |         | 424.3   | V     | 1,579.7 | 790.4 | 1,562.7 | 1,561.7 | 15 |
| 4  | 513.3   |       |         | 495.3   | A     | 1,480.6 | 740.8 | 1,463.6 | 1,462.6 | 14 |
| 5  | 680.3   |       |         | 662.3   | S+80  | 1,409.6 | 705.3 | 1,392.6 | 1,391.6 | 13 |
| 6  | 781.4   | 391.2 |         | 763.4   | T     | 1,242.6 | 621.8 | 1,225.6 | 1,224.6 | 12 |
| 7  | 918.4   | 459.7 |         | 900.4   | H     | 1,141.6 | 571.3 | 1,124.5 | 1,123.5 | 11 |
| 8  | 1,005.5 | 503.2 |         | 987.4   | S     | 1,004.5 | 502.8 | 987.5   | 986.5   | 10 |
| 9  | 1,118.5 | 559.8 |         | 1,100.5 | I     | 917.5   | 459.2 | 900.4   | 899.5   | 9  |
| 10 | 1,205.6 | 603.3 |         | 1,187.6 | S     | 804.4   | 402.7 | 787.4   | 786.4   | 8  |
| 11 | 1,292.6 | 646.8 |         | 1,274.6 | S     | 717.4   | 359.2 | 700.3   | 699.3   | 7  |
| 12 | 1,363.6 | 682.3 |         | 1,345.6 | A     | 630.3   | 315.7 | 613.3   | 612.3   | 6  |
| 13 | 1,434.7 | 717.8 |         | 1,416.7 | A     | 559.3   |       | 542.3   | 541.3   | 5  |
| 14 | 1,535.7 | 768.4 |         | 1,517.7 | T     | 488.2   |       | 471.2   | 470.2   | 4  |
| 15 | 1,632.8 | 816.9 |         | 1,614.8 | P     | 387.2   |       | 370.2   | 369.2   | 3  |
| 16 | 1,747.8 | 874.4 |         | 1,729.8 | D     | 290.1   |       | 273.1   | 272.1   | 2  |
| 17 | 1,921.9 | 961.5 | 1,904.9 | 1,903.9 | R     | 175.1   |       | 158.1   |         | 1  |

# MELK\_HUMAN: VFGpSLER

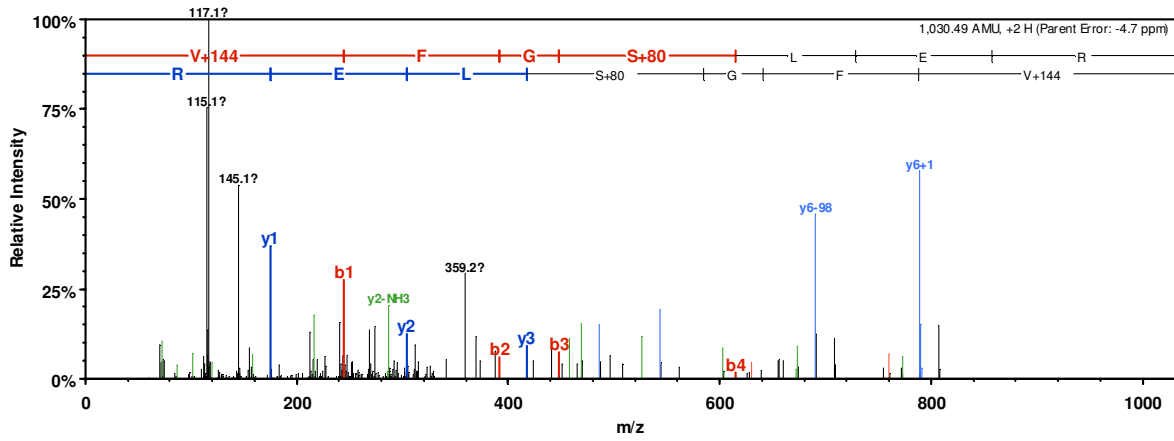

| B | B Ions  | B+2H  | B-NH3   | B-H2O   | AA    | Y Ions  | Y+2H  | Y-NH3   | Y-H2O   | Y |
|---|---------|-------|---------|---------|-------|---------|-------|---------|---------|---|
| 1 | 244.2   |       |         |         | V+144 | 1,031.5 | 516.3 | 1,014.5 | 1,013.5 | 7 |
| 2 | 391.2   |       |         |         | F     | 788.3   | 394.7 | 771.3   | 770.3   | 6 |
| 3 | 448.3   |       |         |         | G     | 641.3   |       | 624.2   | 623.3   | 5 |
| 4 | 615.3   |       |         | 597.3   | S+80  | 584.2   |       | 567.2   | 566.2   | 4 |
| 5 | 728.4   |       |         | 710.3   | L     | 417.2   |       | 400.2   | 399.2   | 3 |
| 6 | 857.4   | 429.2 |         | 839.4   | E     | 304.2   |       | 287.1   | 286.2   | 2 |
| 7 | 1,031.5 | 516.3 | 1,014.5 | 1,013.5 | R     | 175.1   |       | 158.1   |         | 1 |

# MK01\_HUMAN: DVYIVQDLME<sub>p</sub>TDLYK

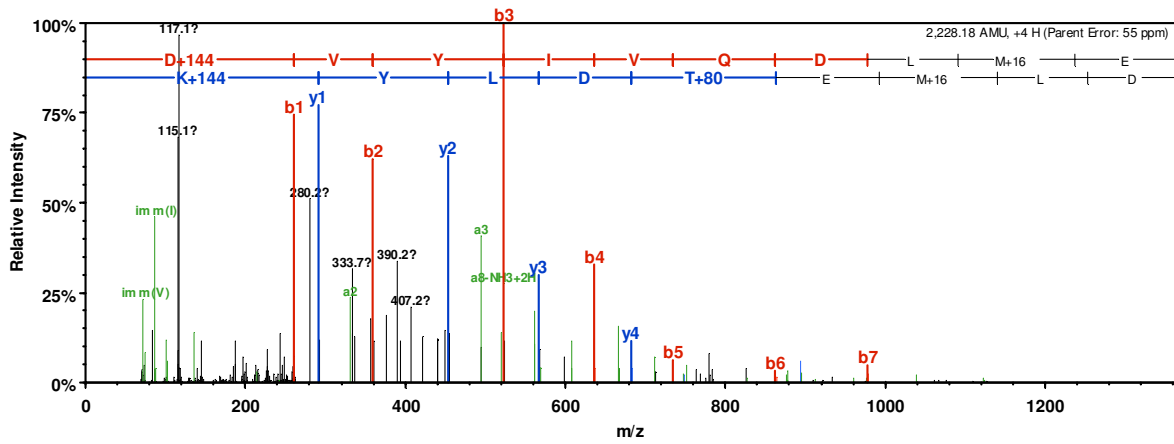

| B  | B Ions  | B+2H    | B-NH3   | B-H2O   | AA    | Y Ions  | Y+2H    | Y-NH3   | Y-H2O   | Y  |
|----|---------|---------|---------|---------|-------|---------|---------|---------|---------|----|
| 1  | 260.1   |         |         | 242.1   | D+144 | 2,229.1 | 1,115.0 | 2,212.0 | 2,211.1 | 15 |
| 2  | 359.2   |         |         | 341.2   | V     | 1,969.9 | 985.5   | 1,952.9 | 1,951.9 | 14 |
| 3  | 522.3   |         |         | 504.3   | Y     | 1,870.9 | 935.9   | 1,853.8 | 1,852.9 | 13 |
| 4  | 635.4   |         |         | 617.3   | I     | 1,707.8 | 854.4   | 1,690.8 | 1,689.8 | 12 |
| 5  | 734.4   |         |         | 716.4   | V     | 1,594.7 | 797.9   | 1,577.7 | 1,576.7 | 11 |
| 6  | 862.5   | 431.7   | 845.5   | 844.5   | Q     | 1,495.7 | 748.3   | 1,478.6 | 1,477.6 | 10 |
| 7  | 977.5   | 489.3   | 960.5   | 959.5   | D     | 1,367.6 | 684.3   | 1,350.6 | 1,349.6 | 9  |
| 8  | 1,090.6 | 545.8   | 1,073.6 | 1,072.6 | L     | 1,252.6 | 626.8   | 1,235.5 | 1,234.6 | 8  |
| 9  | 1,237.6 | 619.3   | 1,220.6 | 1,219.6 | M+16  | 1,139.5 | 570.2   | 1,122.5 | 1,121.5 | 7  |
| 10 | 1,366.7 | 683.8   | 1,349.6 | 1,348.7 | E     | 992.4   | 496.7   | 975.4   | 974.4   | 6  |
| 11 | 1,547.7 | 774.3   | 1,530.7 | 1,529.7 | T+80  | 863.4   |         | 846.4   | 845.4   | 5  |
| 12 | 1,662.7 | 831.9   | 1,645.7 | 1,644.7 | D     | 682.4   |         | 665.4   | 664.4   | 4  |
| 13 | 1,775.8 | 888.4   | 1,758.8 | 1,757.8 | L     | 567.4   |         | 550.3   |         | 3  |
| 14 | 1,938.9 | 969.9   | 1,921.8 | 1,920.8 | Y     | 454.3   |         | 437.3   |         | 2  |
| 15 | 2,229.1 | 1,115.0 | 2,212.0 | 2,211.1 | K+144 | 291.2   |         | 274.2   |         | 1  |

# MK01\_HUMAN: VADPDHDHTGFLpTEYVATR

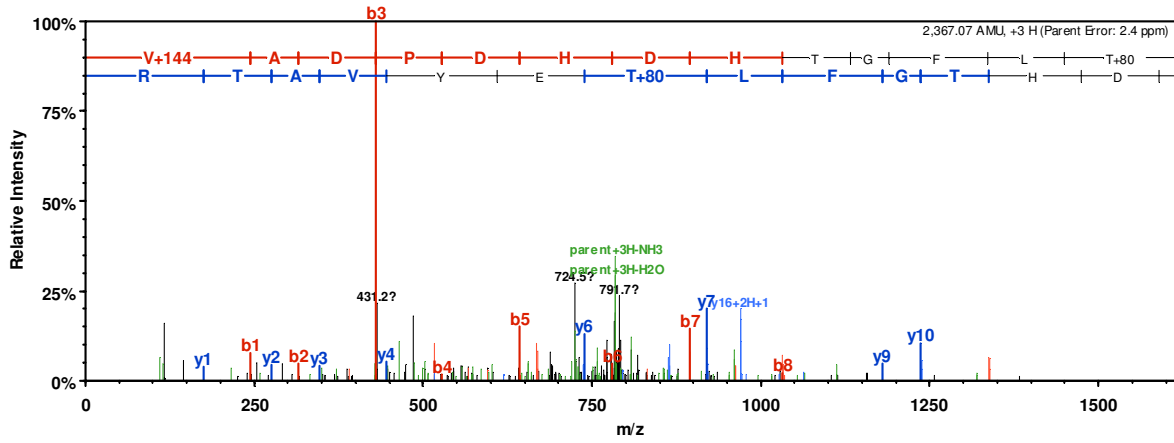

| B  | B Ions  | B+2H    | B-NH3   | B-H2O   | AA    | Y Ions  | Y+2H    | Y-NH3   | Y-H2O   | Y  |
|----|---------|---------|---------|---------|-------|---------|---------|---------|---------|----|
| 1  | 244.2   |         |         |         | V+144 | 2,368.1 | 1,184.5 | 2,351.0 | 2,350.1 | 19 |
| 2  | 315.2   |         |         |         | A     | 2,124.9 | 1,063.0 | 2,107.9 | 2,106.9 | 18 |
| 3  | 430.2   |         |         | 412.2   | D     | 2,053.9 | 1,027.4 | 2,036.8 | 2,035.9 | 17 |
| 4  | 527.3   |         |         | 509.3   | P     | 1,938.8 | 969.9   | 1,921.8 | 1,920.8 | 16 |
| 5  | 642.3   |         |         | 624.3   | D     | 1,841.8 | 921.4   | 1,824.8 | 1,823.8 | 15 |
| 6  | 779.4   | 390.2   |         | 761.4   | H     | 1,726.8 | 863.9   | 1,709.7 | 1,708.7 | 14 |
| 7  | 894.4   | 447.7   |         | 876.4   | D     | 1,589.7 | 795.4   | 1,572.7 | 1,571.7 | 13 |
| 8  | 1,031.5 | 516.2   |         | 1,013.5 | H     | 1,474.7 | 737.8   | 1,457.6 | 1,456.7 | 12 |
| 9  | 1,132.5 | 566.8   |         | 1,114.5 | T     | 1,337.6 | 669.3   | 1,320.6 | 1,319.6 | 11 |
| 10 | 1,189.5 | 595.3   |         | 1,171.5 | G     | 1,236.6 | 618.8   | 1,219.5 | 1,218.6 | 10 |
| 11 | 1,336.6 | 668.8   |         | 1,318.6 | F     | 1,179.5 | 590.3   | 1,162.5 | 1,161.5 | 9  |
| 12 | 1,449.7 | 725.3   |         | 1,431.7 | L     | 1,032.5 | 516.7   | 1,015.5 | 1,014.5 | 8  |
| 13 | 1,630.7 | 815.9   |         | 1,612.7 | T+80  | 919.4   | 460.2   | 902.4   | 901.4   | 7  |
| 14 | 1,759.7 | 880.4   |         | 1,741.7 | E     | 738.4   | 369.7   | 721.4   | 720.4   | 6  |
| 15 | 1,922.8 | 961.9   |         | 1,904.8 | Y     | 609.3   |         | 592.3   | 591.3   | 5  |
| 16 | 2,021.9 | 1,011.4 |         | 2,003.9 | V     | 446.3   |         | 429.2   | 428.3   | 4  |
| 17 | 2,092.9 | 1,047.0 |         | 2,074.9 | A     | 347.2   |         | 330.2   | 329.2   | 3  |
| 18 | 2,194.0 | 1,097.5 |         | 2,176.0 | T     | 276.2   |         | 259.1   | 258.2   | 2  |
| 19 | 2,368.1 | 1,184.5 | 2,351.0 | 2,350.1 | R     | 175.1   |         | 158.1   |         | 1  |



# MK01\_HUMAN: VADPDHDHTGFLTEpYVApTR

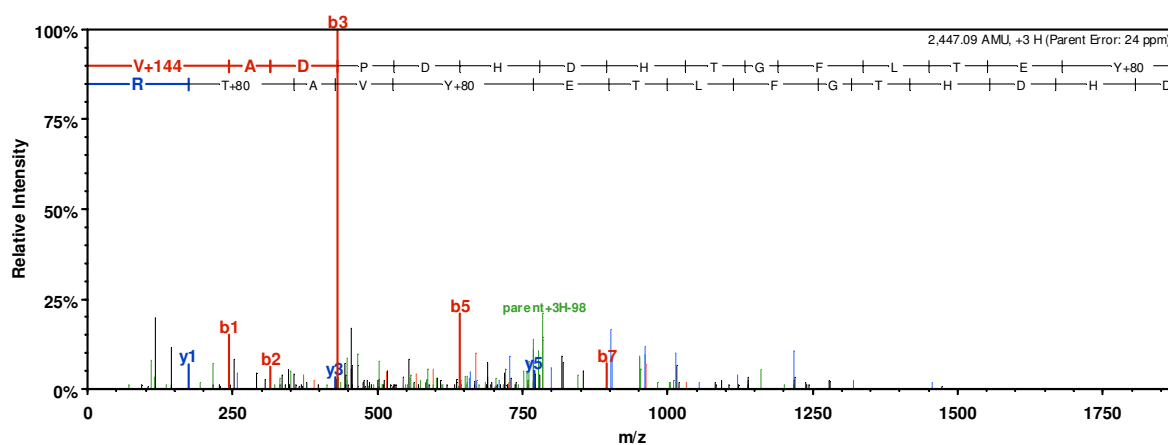

| B  | B Ions  | B+2H    | B-NH3   | B-H2O   | AA    | Y Ions  | Y+2H    | Y-NH3   | Y-H2O   | Y  |
|----|---------|---------|---------|---------|-------|---------|---------|---------|---------|----|
| 1  | 244.2   |         |         |         | V+144 | 2,448.0 | 1,224.5 | 2,431.0 | 2,430.0 | 19 |
| 2  | 315.2   |         |         |         | A     | 2,204.9 | 1,102.9 | 2,187.8 | 2,186.9 | 18 |
| 3  | 430.2   |         |         | 412.2   | D     | 2,133.8 | 1,067.4 | 2,116.8 | 2,115.8 | 17 |
| 4  | 527.3   |         |         | 509.3   | P     | 2,018.8 | 1,009.9 | 2,001.8 | 2,000.8 | 16 |
| 5  | 642.3   |         |         | 624.3   | D     | 1,921.8 | 961.4   | 1,904.7 | 1,903.7 | 15 |
| 6  | 779.4   | 390.2   |         | 761.4   | H     | 1,806.7 | 903.9   | 1,789.7 | 1,788.7 | 14 |
| 7  | 894.4   | 447.7   |         | 876.4   | D     | 1,669.7 | 835.3   | 1,652.6 | 1,651.7 | 13 |
| 8  | 1,031.5 | 516.2   |         | 1,013.5 | H     | 1,554.6 | 777.8   | 1,537.6 | 1,536.6 | 12 |
| 9  | 1,132.5 | 566.8   |         | 1,114.5 | T     | 1,417.6 | 709.3   | 1,400.6 | 1,399.6 | 11 |
| 10 | 1,189.5 | 595.3   |         | 1,171.5 | G     | 1,316.5 | 658.8   | 1,299.5 | 1,298.5 | 10 |
| 11 | 1,336.6 | 668.8   |         | 1,318.6 | F     | 1,259.5 | 630.3   | 1,242.5 | 1,241.5 | 9  |
| 12 | 1,449.7 | 725.3   |         | 1,431.7 | L     | 1,112.4 | 556.7   | 1,095.4 | 1,094.4 | 8  |
| 13 | 1,550.7 | 775.9   |         | 1,532.7 | T     | 999.4   | 500.2   | 982.3   | 981.3   | 7  |
| 14 | 1,679.8 | 840.4   |         | 1,661.8 | E     | 898.3   | 449.7   | 881.3   | 880.3   | 6  |
| 15 | 1,922.8 | 961.9   |         | 1,904.8 | Y+80  | 769.3   |         | 752.2   | 751.3   | 5  |
| 16 | 2,021.9 | 1,011.4 |         | 2,003.9 | V     | 526.2   |         | 509.2   | 508.2   | 4  |
| 17 | 2,092.9 | 1,047.0 |         | 2,074.9 | A     | 427.2   |         | 410.1   | 409.2   | 3  |
| 18 | 2,273.9 | 1,137.5 |         | 2,255.9 | T+80  | 356.1   |         | 339.1   | 338.1   | 2  |
| 19 | 2,448.0 | 1,224.5 | 2,431.0 | 2,430.0 | R     | 175.1   |         | 158.1   |         | 1  |

# MLTK\_HUMAN: SpSSPTQYGLTK

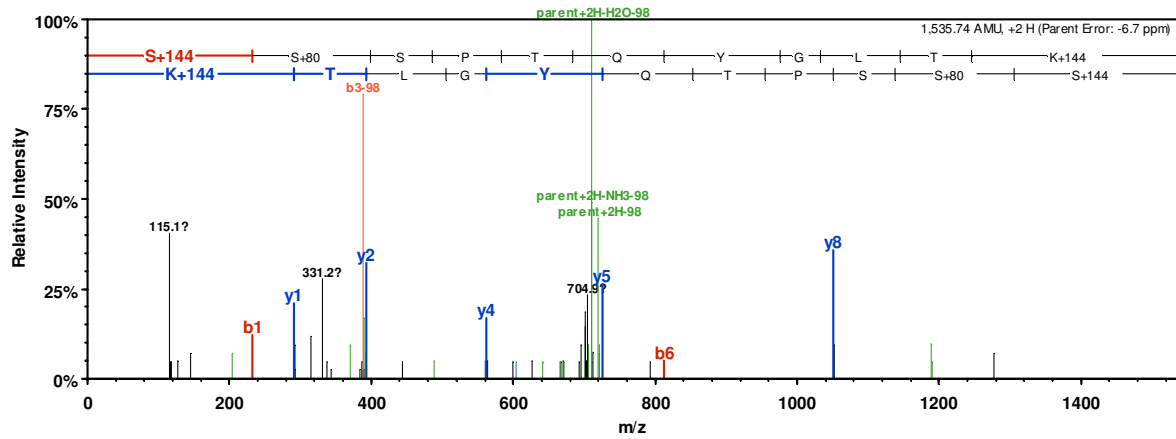

| B  | B Ions  | B+2H  | B-NH3   | B-H2O   | AA    | Y Ions  | Y+2H  | Y-NH3   | Y-H2O   | Y  |
|----|---------|-------|---------|---------|-------|---------|-------|---------|---------|----|
| 1  | 232.1   |       |         | 214.1   | S+144 | 1,536.8 | 768.9 | 1,519.7 | 1,518.7 | 11 |
| 2  | 399.1   |       |         | 381.1   | S+80  | 1,305.6 | 653.3 | 1,288.6 | 1,287.6 | 10 |
| 3  | 486.2   |       |         | 468.2   | S     | 1,138.6 | 569.8 | 1,121.6 | 1,120.6 | 9  |
| 4  | 583.2   |       |         | 565.2   | P     | 1,051.6 | 526.3 | 1,034.6 | 1,033.6 | 8  |
| 5  | 684.3   |       |         | 666.3   | T     | 954.5   | 477.8 | 937.5   | 936.5   | 7  |
| 6  | 812.3   | 406.7 | 795.3   | 794.3   | Q     | 853.5   | 427.2 | 836.5   | 835.5   | 6  |
| 7  | 975.4   | 488.2 | 958.4   | 957.4   | Y     | 725.4   |       | 708.4   | 707.4   | 5  |
| 8  | 1,032.4 | 516.7 | 1,015.4 | 1,014.4 | G     | 562.4   |       | 545.3   | 544.4   | 4  |
| 9  | 1,145.5 | 573.3 | 1,128.5 | 1,127.5 | L     | 505.3   |       | 488.3   | 487.3   | 3  |
| 10 | 1,246.5 | 623.8 | 1,229.5 | 1,228.5 | T     | 392.3   |       | 375.2   | 374.3   | 2  |
| 11 | 1,536.8 | 768.9 | 1,519.7 | 1,518.7 | K+144 | 291.2   |       | 274.2   |         | 1  |

# MLTK\_HUMAN: SS<sup>p</sup>SPTQYGLTK

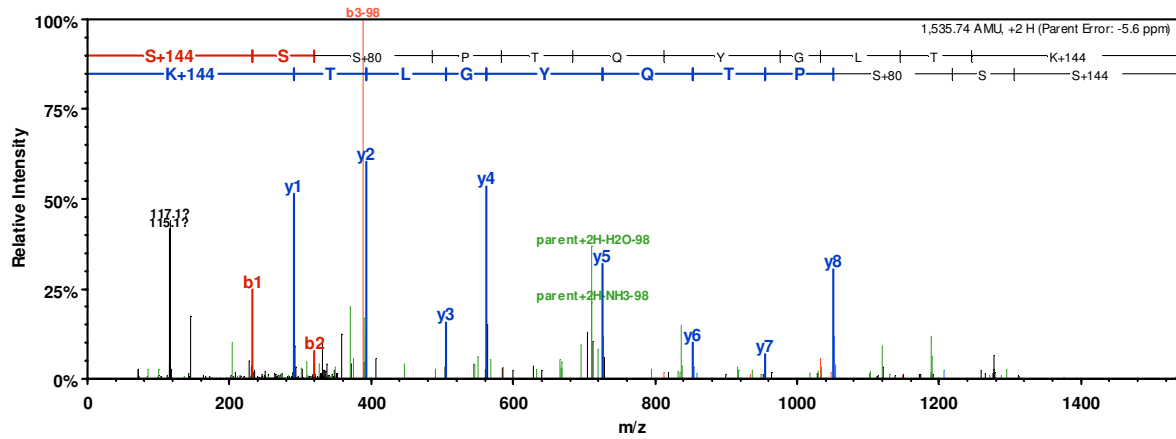

| B  | B Ions  | B+2H  | B-NH3   | B-H2O   | AA    | Y Ions  | Y+2H  | Y-NH3   | Y-H2O   | Y  |
|----|---------|-------|---------|---------|-------|---------|-------|---------|---------|----|
| 1  | 232.1   |       |         | 214.1   | S+144 | 1,536.8 | 768.9 | 1,519.7 | 1,518.7 | 11 |
| 2  | 319.2   |       |         | 301.2   | S     | 1,305.6 | 653.3 | 1,288.6 | 1,287.6 | 10 |
| 3  | 486.2   |       |         | 468.2   | S+80  | 1,218.6 | 609.8 | 1,201.6 | 1,200.6 | 9  |
| 4  | 583.2   |       |         | 565.2   | P     | 1,051.6 | 526.3 | 1,034.6 | 1,033.6 | 8  |
| 5  | 684.3   |       |         | 666.3   | T     | 954.5   | 477.8 | 937.5   | 936.5   | 7  |
| 6  | 812.3   | 406.7 | 795.3   | 794.3   | Q     | 853.5   | 427.2 | 836.5   | 835.5   | 6  |
| 7  | 975.4   | 488.2 | 958.4   | 957.4   | Y     | 725.4   |       | 708.4   | 707.4   | 5  |
| 8  | 1,032.4 | 516.7 | 1,015.4 | 1,014.4 | G     | 562.4   |       | 545.3   | 544.4   | 4  |
| 9  | 1,145.5 | 573.3 | 1,128.5 | 1,127.5 | L     | 505.3   |       | 488.3   | 487.3   | 3  |
| 10 | 1,246.5 | 623.8 | 1,229.5 | 1,228.5 | T     | 392.3   |       | 375.2   | 374.3   | 2  |
| 11 | 1,536.8 | 768.9 | 1,519.7 | 1,518.7 | K+144 | 291.2   |       | 274.2   |         | 1  |

# MLTK\_HUMAN: VSQSALNPHQpSPDFKR

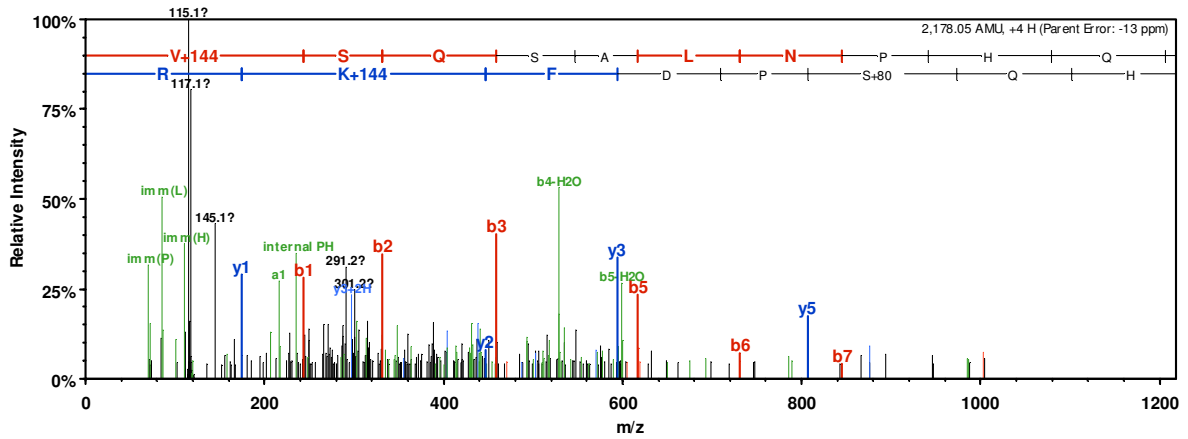

| B  | B Ions  | B+2H    | B-NH3   | B-H2O   | AA    | Y Ions  | Y+2H    | Y-NH3   | Y-H2O   | Y  |
|----|---------|---------|---------|---------|-------|---------|---------|---------|---------|----|
| 1  | 244.2   |         |         |         | V+144 | 2,179.1 | 1,090.0 | 2,162.1 | 2,161.1 | 16 |
| 2  | 331.2   |         |         | 313.2   | S     | 1,935.9 | 968.5   | 1,918.9 | 1,917.9 | 15 |
| 3  | 459.3   |         | 442.2   | 441.3   | Q     | 1,848.9 | 924.9   | 1,831.9 | 1,830.9 | 14 |
| 4  | 546.3   |         | 529.3   | 528.3   | S     | 1,720.8 | 860.9   | 1,703.8 | 1,702.8 | 13 |
| 5  | 617.3   |         | 600.3   | 599.3   | A     | 1,633.8 | 817.4   | 1,616.8 | 1,615.8 | 12 |
| 6  | 730.4   | 365.7   | 713.4   | 712.4   | L     | 1,562.8 | 781.9   | 1,545.7 | 1,544.7 | 11 |
| 7  | 844.5   | 422.7   | 827.4   | 826.5   | N     | 1,449.7 | 725.3   | 1,432.6 | 1,431.7 | 10 |
| 8  | 941.5   | 471.3   | 924.5   | 923.5   | P     | 1,335.6 | 668.3   | 1,318.6 | 1,317.6 | 9  |
| 9  | 1,078.6 | 539.8   | 1,061.6 | 1,060.6 | H     | 1,238.6 | 619.8   | 1,221.6 | 1,220.6 | 8  |
| 10 | 1,206.6 | 603.8   | 1,189.6 | 1,188.6 | Q     | 1,101.5 | 551.3   | 1,084.5 | 1,083.5 | 7  |
| 11 | 1,373.6 | 687.3   | 1,356.6 | 1,355.6 | S+80  | 973.5   | 487.2   | 956.4   | 955.5   | 6  |
| 12 | 1,470.7 | 735.8   | 1,453.7 | 1,452.7 | P     | 806.5   | 403.7   | 789.4   | 788.5   | 5  |
| 13 | 1,585.7 | 793.4   | 1,568.7 | 1,567.7 | D     | 709.4   | 355.2   | 692.4   | 691.4   | 4  |
| 14 | 1,732.8 | 866.9   | 1,715.8 | 1,714.8 | F     | 594.4   | 297.7   | 577.4   |         | 3  |
| 15 | 2,005.0 | 1,003.0 | 1,988.0 | 1,987.0 | K+144 | 447.3   | 224.2   | 430.3   |         | 2  |
| 16 | 2,179.1 | 1,090.0 | 2,162.1 | 2,161.1 | R     | 175.1   |         | 158.1   |         | 1  |

# MLTK\_HUMAN: YQQITPVNQpSR

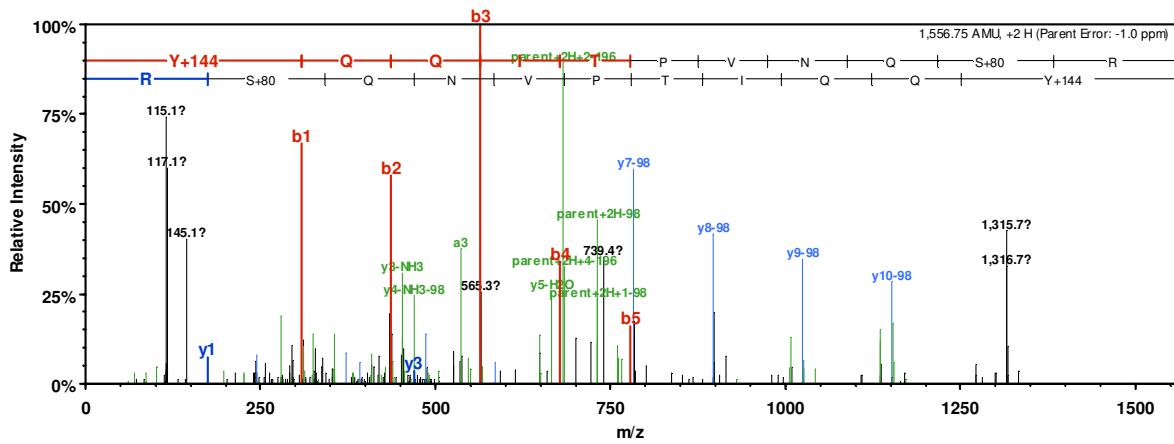

| B  | B Ions  | B+2H  | B-NH3   | B-H2O   | AA    | Y Ions  | Y+2H  | Y-NH3   | Y-H2O   | Y  |
|----|---------|-------|---------|---------|-------|---------|-------|---------|---------|----|
| 1  | 308.2   |       |         |         | Y+144 | 1,557.8 | 779.4 | 1,540.7 | 1,539.7 | 11 |
| 2  | 436.2   |       | 419.2   |         | Q     | 1,250.6 | 625.8 | 1,233.6 | 1,232.6 | 10 |
| 3  | 564.3   |       | 547.3   |         | Q     | 1,122.5 | 561.8 | 1,105.5 | 1,104.5 | 9  |
| 4  | 677.4   |       | 660.3   |         | I     | 994.5   | 497.7 | 977.4   | 976.5   | 8  |
| 5  | 778.4   |       | 761.4   | 760.4   | T     | 881.4   | 441.2 | 864.4   | 863.4   | 7  |
| 6  | 875.5   | 438.2 | 858.4   | 857.5   | P     | 780.3   | 390.7 | 763.3   | 762.3   | 6  |
| 7  | 974.5   | 487.8 | 957.5   | 956.5   | V     | 683.3   |       | 666.3   | 665.3   | 5  |
| 8  | 1,088.6 | 544.8 | 1,071.6 | 1,070.6 | N     | 584.2   |       | 567.2   | 566.2   | 4  |
| 9  | 1,216.6 | 608.8 | 1,199.6 | 1,198.6 | Q     | 470.2   |       | 453.1   | 452.2   | 3  |
| 10 | 1,383.6 | 692.3 | 1,366.6 | 1,365.6 | S+80  | 342.1   |       | 325.1   | 324.1   | 2  |
| 11 | 1,557.8 | 779.4 | 1,540.7 | 1,539.7 | R     | 175.1   |       | 158.1   |         | 1  |

# NEK9\_HUMAN: pSSTVTEAPIAVVTSR

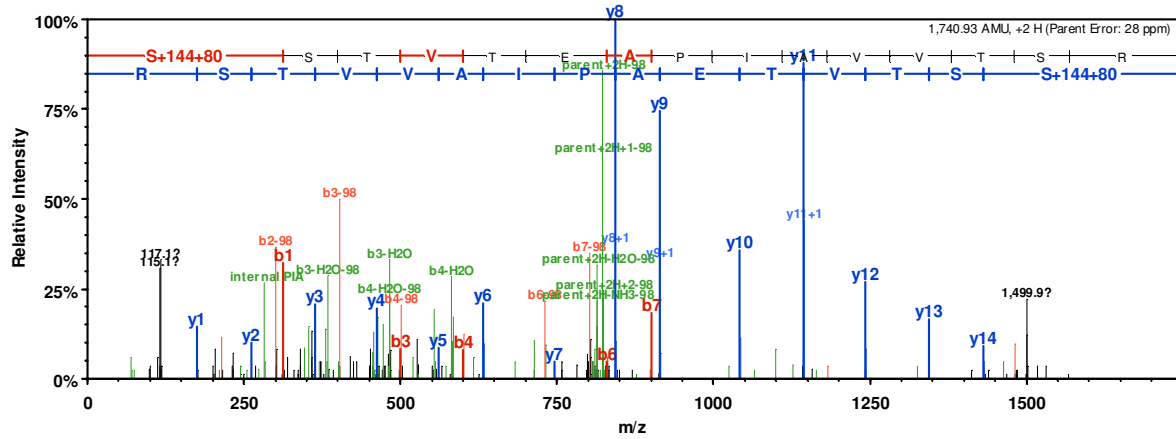

| B  | B Ions  | B+2H  | B-NH3   | B-H2O   | AA    | Y Ions  | Y+2H  | Y-NH3   | Y-H2O   | Y  |
|----|---------|-------|---------|---------|-------|---------|-------|---------|---------|----|
| 1  | 312.1   |       |         | 294.1   | S+224 | 1,741.9 | 871.4 | 1,724.9 | 1,723.9 | 15 |
| 2  | 399.1   |       |         | 381.1   | S     | 1,430.8 | 715.9 | 1,413.8 | 1,412.8 | 14 |
| 3  | 500.2   |       |         | 482.2   | T     | 1,343.8 | 672.4 | 1,326.7 | 1,325.7 | 13 |
| 4  | 599.3   |       |         | 581.2   | V     | 1,242.7 | 621.9 | 1,225.7 | 1,224.7 | 12 |
| 5  | 700.3   |       |         | 682.3   | T     | 1,143.6 | 572.3 | 1,126.6 | 1,125.6 | 11 |
| 6  | 829.3   | 415.2 |         | 811.3   | E     | 1,042.6 | 521.8 | 1,025.6 | 1,024.6 | 10 |
| 7  | 900.4   | 450.7 |         | 882.4   | A     | 913.5   | 457.3 | 896.5   | 895.5   | 9  |
| 8  | 997.4   | 499.2 |         | 979.4   | P     | 842.5   | 421.8 | 825.5   | 824.5   | 8  |
| 9  | 1,110.5 | 555.8 |         | 1,092.5 | I     | 745.5   | 373.2 | 728.4   | 727.4   | 7  |
| 10 | 1,181.6 | 591.3 |         | 1,163.5 | A     | 632.4   | 316.7 | 615.3   | 614.4   | 6  |
| 11 | 1,280.6 | 640.8 |         | 1,262.6 | V     | 561.3   |       | 544.3   | 543.3   | 5  |
| 12 | 1,379.7 | 690.4 |         | 1,361.7 | V     | 462.3   |       | 445.2   | 444.3   | 4  |
| 13 | 1,480.7 | 740.9 |         | 1,462.7 | T     | 363.2   |       | 346.2   | 345.2   | 3  |
| 14 | 1,567.8 | 784.4 |         | 1,549.8 | S     | 262.2   |       | 245.1   | 244.1   | 2  |
| 15 | 1,741.9 | 871.4 | 1,724.9 | 1,723.9 | R     | 175.1   |       | 158.1   |         | 1  |

# NEK9\_HUMAN: SpSTVTEAPIAVVTSR

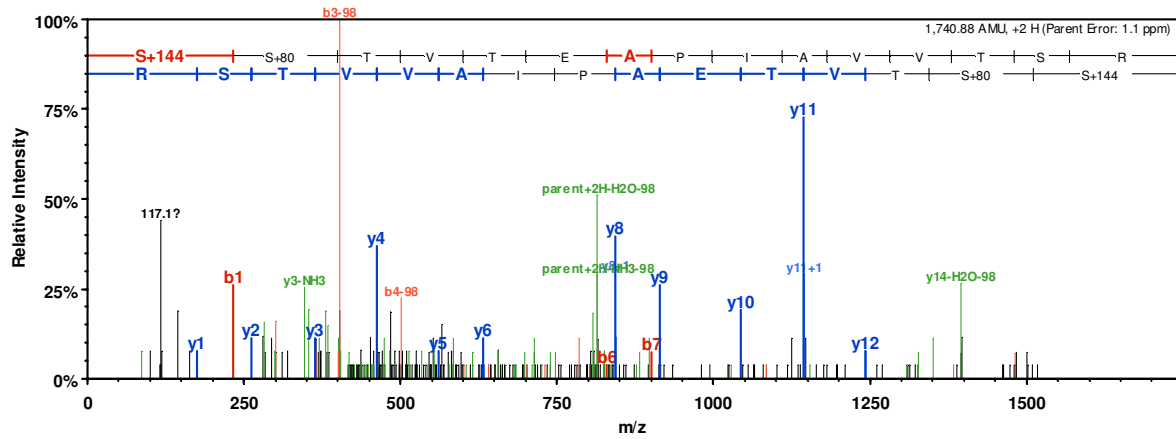

| B  | B Ions  | B+2H  | B-NH3   | B-H2O   | AA    | Y Ions  | Y+2H  | Y-NH3   | Y-H2O   | Y  |
|----|---------|-------|---------|---------|-------|---------|-------|---------|---------|----|
| 1  | 232.1   |       |         | 214.1   | S+144 | 1,741.9 | 871.4 | 1,724.9 | 1,723.9 | 15 |
| 2  | 399.1   |       |         | 381.1   | S+80  | 1,510.8 | 755.9 | 1,493.7 | 1,492.7 | 14 |
| 3  | 500.2   |       |         | 482.2   | T     | 1,343.8 | 672.4 | 1,326.7 | 1,325.7 | 13 |
| 4  | 599.3   |       |         | 581.2   | V     | 1,242.7 | 621.9 | 1,225.7 | 1,224.7 | 12 |
| 5  | 700.3   |       |         | 682.3   | T     | 1,143.6 | 572.3 | 1,126.6 | 1,125.6 | 11 |
| 6  | 829.3   | 415.2 |         | 811.3   | E     | 1,042.6 | 521.8 | 1,025.6 | 1,024.6 | 10 |
| 7  | 900.4   | 450.7 |         | 882.4   | A     | 913.5   | 457.3 | 896.5   | 895.5   | 9  |
| 8  | 997.4   | 499.2 |         | 979.4   | P     | 842.5   | 421.8 | 825.5   | 824.5   | 8  |
| 9  | 1,110.5 | 555.8 |         | 1,092.5 | I     | 745.5   | 373.2 | 728.4   | 727.4   | 7  |
| 10 | 1,181.6 | 591.3 |         | 1,163.5 | A     | 632.4   | 316.7 | 615.3   | 614.4   | 6  |
| 11 | 1,280.6 | 640.8 |         | 1,262.6 | V     | 561.3   |       | 544.3   | 543.3   | 5  |
| 12 | 1,379.7 | 690.4 |         | 1,361.7 | V     | 462.3   |       | 445.2   | 444.3   | 4  |
| 13 | 1,480.7 | 740.9 |         | 1,462.7 | T     | 363.2   |       | 346.2   | 345.2   | 3  |
| 14 | 1,567.8 | 784.4 |         | 1,549.8 | S     | 262.2   |       | 245.1   | 244.1   | 2  |
| 15 | 1,741.9 | 871.4 | 1,724.9 | 1,723.9 | R     | 175.1   |       | 158.1   |         | 1  |

# NEK9\_HUMAN: VASEAPLEHKPQVEASpSPR

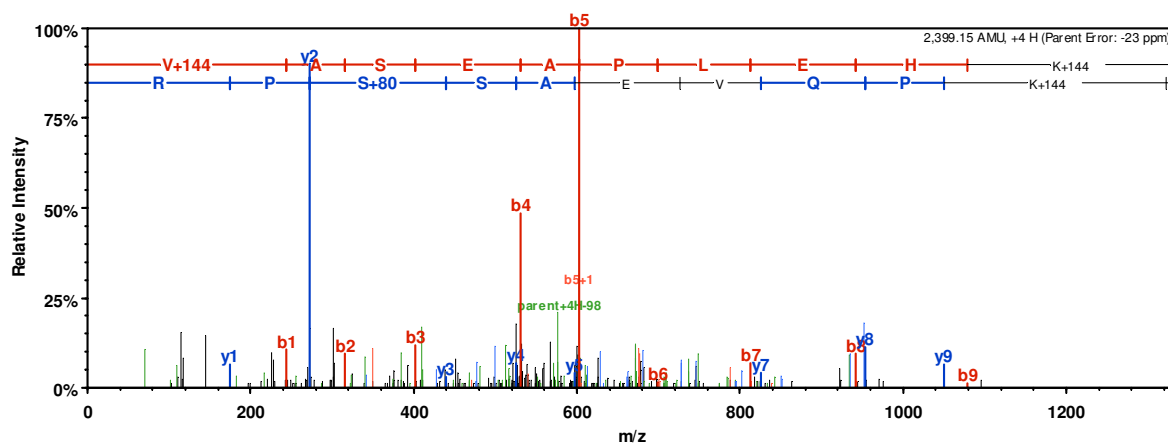

| B  | B Ions  | B+2H    | B-NH3   | B-H2O   | AA    | Y Ions  | Y+2H    | Y-NH3   | Y-H2O   | Y  |
|----|---------|---------|---------|---------|-------|---------|---------|---------|---------|----|
| 1  | 244.2   |         |         |         | V+144 | 2,400.2 | 1,200.6 | 2,383.2 | 2,382.2 | 19 |
| 2  | 315.2   |         |         |         | A     | 2,157.0 | 1,079.0 | 2,140.0 | 2,139.0 | 18 |
| 3  | 402.2   |         |         | 384.2   | S     | 2,086.0 | 1,043.5 | 2,069.0 | 2,068.0 | 17 |
| 4  | 531.3   |         |         | 513.3   | E     | 1,999.0 | 1,000.0 | 1,982.0 | 1,981.0 | 16 |
| 5  | 602.3   |         |         | 584.3   | A     | 1,869.9 | 935.5   | 1,852.9 | 1,851.9 | 15 |
| 6  | 699.4   | 350.2   |         | 681.4   | P     | 1,798.9 | 900.0   | 1,781.9 | 1,780.9 | 14 |
| 7  | 812.5   | 406.7   |         | 794.5   | L     | 1,701.8 | 851.4   | 1,684.8 | 1,683.8 | 13 |
| 8  | 941.5   | 471.3   |         | 923.5   | E     | 1,588.8 | 794.9   | 1,571.7 | 1,570.8 | 12 |
| 9  | 1,078.6 | 539.8   |         | 1,060.6 | H     | 1,459.7 | 730.4   | 1,442.7 | 1,441.7 | 11 |
| 10 | 1,350.8 | 675.9   | 1,333.7 | 1,332.8 | K+144 | 1,322.7 | 661.8   | 1,305.6 | 1,304.6 | 10 |
| 11 | 1,447.8 | 724.4   | 1,430.8 | 1,429.8 | P     | 1,050.5 | 525.7   | 1,033.4 | 1,032.5 | 9  |
| 12 | 1,575.9 | 788.4   | 1,558.8 | 1,557.9 | Q     | 953.4   | 477.2   | 936.4   | 935.4   | 8  |
| 13 | 1,674.9 | 838.0   | 1,657.9 | 1,656.9 | V     | 825.4   | 413.2   | 808.3   | 807.3   | 7  |
| 14 | 1,804.0 | 902.5   | 1,787.0 | 1,786.0 | E     | 726.3   | 363.6   | 709.3   | 708.3   | 6  |
| 15 | 1,875.0 | 938.0   | 1,858.0 | 1,857.0 | A     | 597.2   |         | 580.2   | 579.2   | 5  |
| 16 | 1,962.1 | 981.5   | 1,945.0 | 1,944.0 | S     | 526.2   |         | 509.2   | 508.2   | 4  |
| 17 | 2,129.1 | 1,065.0 | 2,112.0 | 2,111.0 | S+80  | 439.2   |         | 422.1   | 421.2   | 3  |
| 18 | 2,226.1 | 1,113.6 | 2,209.1 | 2,208.1 | P     | 272.2   |         | 255.1   |         | 2  |
| 19 | 2,400.2 | 1,200.6 | 2,383.2 | 2,382.2 | R     | 175.1   |         | 158.1   |         | 1  |



# PAK4\_HUMAN: RDpSPPPPAR

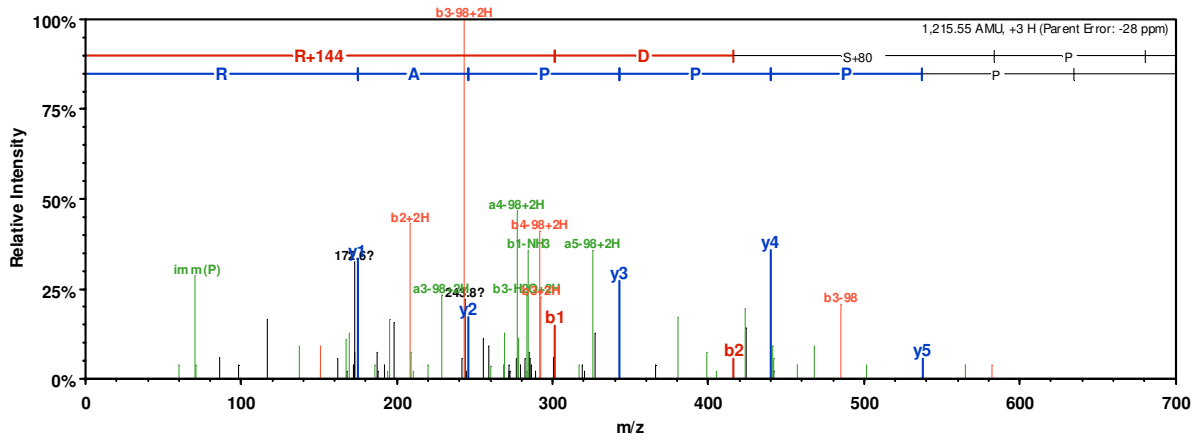

| B | B Ions  | B+2H  | B-NH3   | B-H2O   | AA    | Y Ions  | Y+2H  | Y-NH3   | Y-H2O   | Y |
|---|---------|-------|---------|---------|-------|---------|-------|---------|---------|---|
| 1 | 301.2   | 151.1 | 284.2   |         | R+144 | 1,216.6 | 608.8 | 1,199.6 | 1,198.6 | 9 |
| 2 | 416.2   | 208.6 | 399.2   | 398.2   | D     | 916.4   | 458.7 | 899.4   | 898.4   | 8 |
| 3 | 583.2   | 292.1 | 566.2   | 565.2   | S+80  | 801.4   | 401.2 | 784.3   | 783.4   | 7 |
| 4 | 680.3   | 340.6 | 663.3   | 662.3   | P     | 634.4   | 317.7 | 617.3   |         | 6 |
| 5 | 777.3   | 389.2 | 760.3   | 759.3   | P     | 537.3   |       | 520.3   |         | 5 |
| 6 | 874.4   | 437.7 | 857.4   | 856.4   | P     | 440.3   |       | 423.2   |         | 4 |
| 7 | 971.4   | 486.2 | 954.4   | 953.4   | P     | 343.2   |       | 326.2   |         | 3 |
| 8 | 1,042.5 | 521.7 | 1,025.5 | 1,024.5 | A     | 246.2   |       | 229.1   |         | 2 |
| 9 | 1,216.6 | 608.8 | 1,199.6 | 1,198.6 | R     | 175.1   |       | 158.1   |         | 1 |

# PCTK1\_HUMAN: KIpSTEDINK

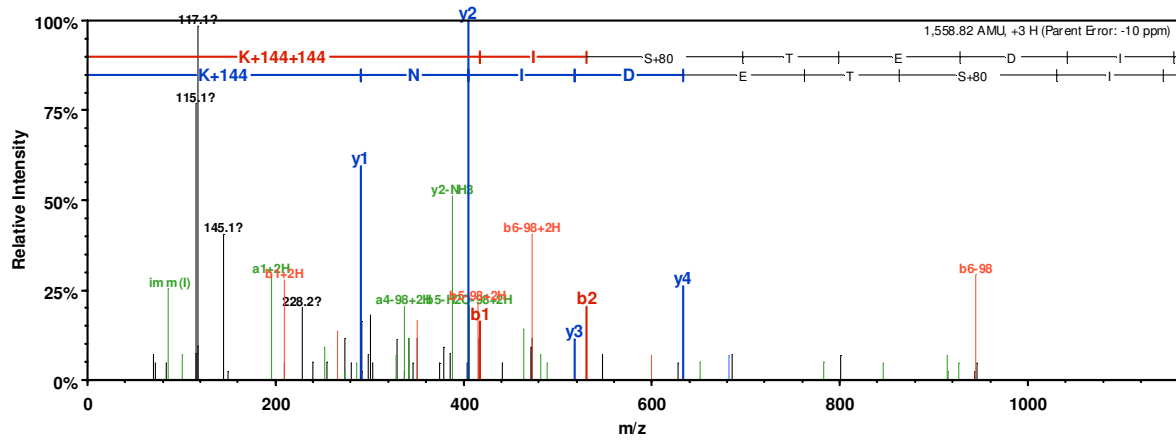

| B | B Ions  | B+2H  | B-NH3   | B-H2O   | AA    | Y Ions  | Y+2H  | Y-NH3   | Y-H2O   | Y |
|---|---------|-------|---------|---------|-------|---------|-------|---------|---------|---|
| 1 | 417.3   | 209.2 | 400.3   |         | K+288 | 1,559.8 | 780.4 | 1,542.8 | 1,541.8 | 9 |
| 2 | 530.4   | 265.7 | 513.4   |         | I     | 1,143.5 | 572.3 | 1,126.5 | 1,125.5 | 8 |
| 3 | 697.4   | 349.2 | 680.4   | 679.4   | S+80  | 1,030.5 | 515.7 | 1,013.4 | 1,012.4 | 7 |
| 4 | 798.4   | 399.7 | 781.4   | 780.4   | T     | 863.5   | 432.2 | 846.4   | 845.4   | 6 |
| 5 | 927.5   | 464.2 | 910.5   | 909.5   | E     | 762.4   |       | 745.4   | 744.4   | 5 |
| 6 | 1,042.5 | 521.8 | 1,025.5 | 1,024.5 | D     | 633.4   |       | 616.3   | 615.4   | 4 |
| 7 | 1,155.6 | 578.3 | 1,138.6 | 1,137.6 | I     | 518.3   |       | 501.3   |         | 3 |
| 8 | 1,269.6 | 635.3 | 1,252.6 | 1,251.6 | N     | 405.3   |       | 388.2   |         | 2 |
| 9 | 1,559.8 | 780.4 | 1,542.8 | 1,541.8 | K+144 | 291.2   |       | 274.2   |         | 1 |

# PCTK1\_HUMAN: LpSLPADIR

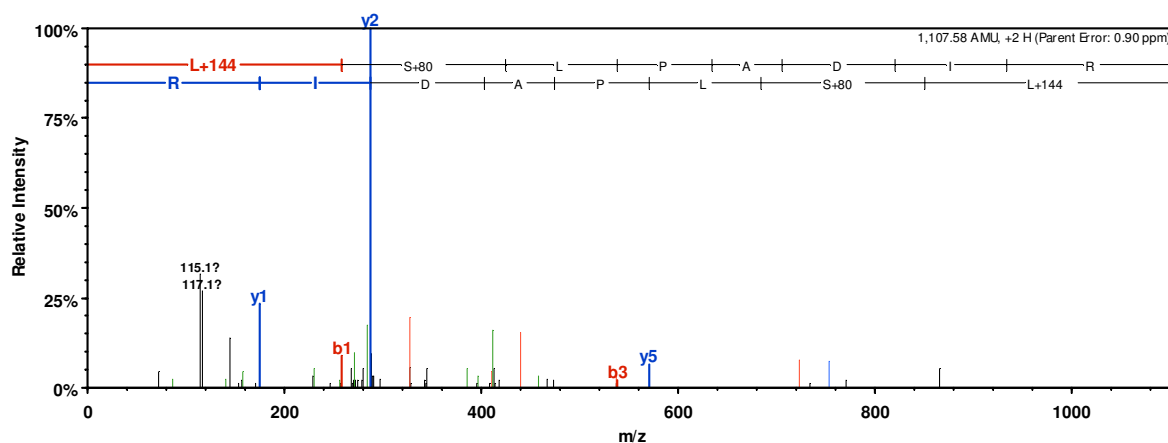

| B | B Ions  | B+2H  | B-NH3   | B-H2O   | AA    | Y Ions  | Y+2H  | Y-NH3   | Y-H2O   | Y |
|---|---------|-------|---------|---------|-------|---------|-------|---------|---------|---|
| 1 | 258.2   |       |         |         | L+144 | 1,108.6 | 554.8 | 1,091.6 | 1,090.6 | 8 |
| 2 | 425.2   |       |         | 407.2   | S+80  | 851.4   | 426.2 | 834.4   | 833.4   | 7 |
| 3 | 538.3   |       |         | 520.3   | L     | 684.4   | 342.7 | 667.4   | 666.4   | 6 |
| 4 | 635.3   |       |         | 617.3   | P     | 571.3   |       | 554.3   | 553.3   | 5 |
| 5 | 706.4   |       |         | 688.4   | A     | 474.3   |       | 457.2   | 456.3   | 4 |
| 6 | 821.4   | 411.2 |         | 803.4   | D     | 403.2   |       | 386.2   | 385.2   | 3 |
| 7 | 934.5   | 467.7 |         | 916.5   | I     | 288.2   |       | 271.2   |         | 2 |
| 8 | 1,108.6 | 554.8 | 1,091.6 | 1,090.6 | R     | 175.1   |       | 158.1   |         | 1 |

# PCTK1\_HUMAN: LTLNpSPIFDKPLSR

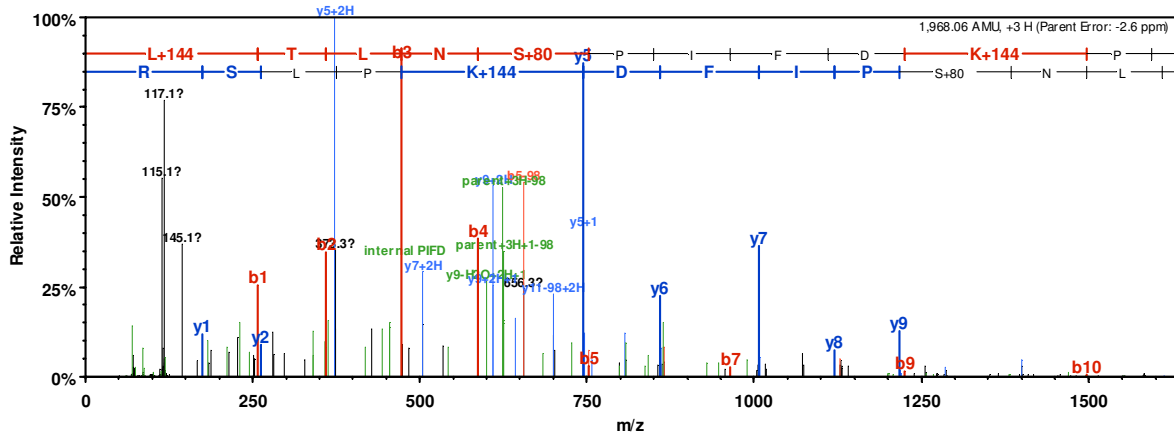

| B  | B Ions  | B+2H  | B-NH3   | B-H2O   | AA    | Y Ions  | Y+2H  | Y-NH3   | Y-H2O   | Y  |
|----|---------|-------|---------|---------|-------|---------|-------|---------|---------|----|
| 1  | 258.2   |       |         |         | L+144 | 1,969.1 | 985.0 | 1,952.1 | 1,951.1 | 14 |
| 2  | 359.2   |       |         | 341.2   | T     | 1,711.9 | 856.4 | 1,694.9 | 1,693.9 | 13 |
| 3  | 472.3   |       |         | 454.3   | L     | 1,610.8 | 805.9 | 1,593.8 | 1,592.8 | 12 |
| 4  | 586.4   |       | 569.3   | 568.4   | N     | 1,497.8 | 749.4 | 1,480.7 | 1,479.7 | 11 |
| 5  | 753.4   |       | 736.3   | 735.4   | S+80  | 1,383.7 | 692.4 | 1,366.7 | 1,365.7 | 10 |
| 6  | 850.4   | 425.7 | 833.4   | 832.4   | P     | 1,216.7 | 608.9 | 1,199.7 | 1,198.7 | 9  |
| 7  | 963.5   | 482.3 | 946.5   | 945.5   | I     | 1,119.7 | 560.3 | 1,102.6 | 1,101.7 | 8  |
| 8  | 1,110.6 | 555.8 | 1,093.5 | 1,092.6 | F     | 1,006.6 | 503.8 | 989.6   | 988.6   | 7  |
| 9  | 1,225.6 | 613.3 | 1,208.6 | 1,207.6 | D     | 859.5   | 430.3 | 842.5   | 841.5   | 6  |
| 10 | 1,497.8 | 749.4 | 1,480.8 | 1,479.8 | K+144 | 744.5   | 372.7 | 727.5   | 726.5   | 5  |
| 11 | 1,594.8 | 797.9 | 1,577.8 | 1,576.8 | P     | 472.3   |       | 455.3   | 454.3   | 4  |
| 12 | 1,707.9 | 854.5 | 1,690.9 | 1,689.9 | L     | 375.2   |       | 358.2   | 357.2   | 3  |
| 13 | 1,795.0 | 898.0 | 1,777.9 | 1,777.0 | S     | 262.2   |       | 245.1   | 244.1   | 2  |
| 14 | 1,969.1 | 985.0 | 1,952.1 | 1,951.1 | R     | 175.1   |       | 158.1   |         | 1  |

# PCTK1\_HUMAN: MGSDGESDQASATSSDEVQpSPVR

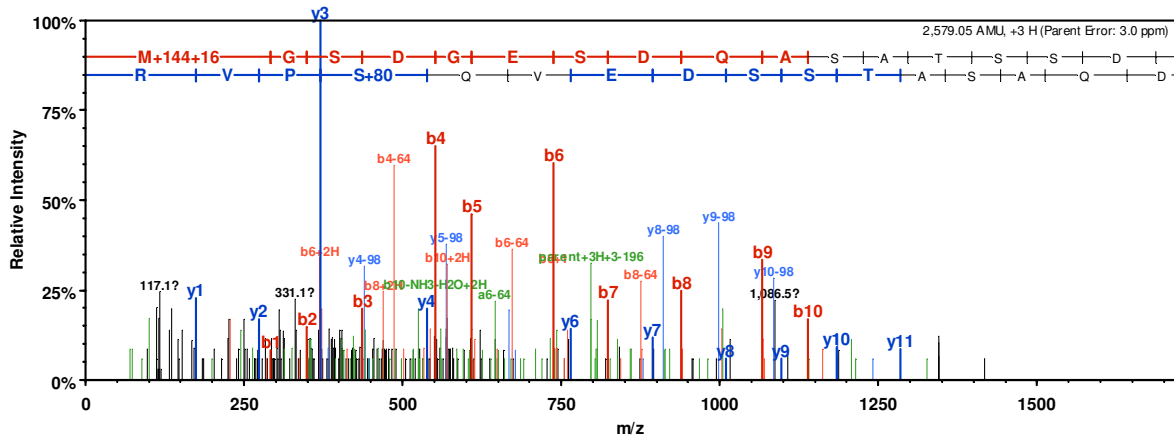

| B  | B Ions  | B+2H    | B-NH3   | B-H2O   | AA     | Y Ions  | Y+2H    | Y-NH3   | Y-H2O   | Y  |
|----|---------|---------|---------|---------|--------|---------|---------|---------|---------|----|
| 1  | 292.1   |         |         |         | M+1... | 2,580.1 | 1,290.5 | 2,563.0 | 2,562.0 | 23 |
| 2  | 349.2   |         |         |         | G      | 2,288.9 | 1,145.0 | 2,271.9 | 2,270.9 | 22 |
| 3  | 436.2   |         |         | 418.2   | S      | 2,231.9 | 1,116.5 | 2,214.9 | 2,213.9 | 21 |
| 4  | 551.2   |         |         | 533.2   | D      | 2,144.9 | 1,072.9 | 2,127.8 | 2,126.9 | 20 |
| 5  | 608.2   |         |         | 590.2   | G      | 2,029.8 | 1,015.4 | 2,012.8 | 2,011.8 | 19 |
| 6  | 737.3   | 369.1   |         | 719.3   | E      | 1,972.8 | 986.9   | 1,955.8 | 1,954.8 | 18 |
| 7  | 824.3   | 412.7   |         | 806.3   | S      | 1,843.8 | 922.4   | 1,826.7 | 1,825.8 | 17 |
| 8  | 939.3   | 470.2   |         | 921.3   | D      | 1,756.7 | 878.9   | 1,739.7 | 1,738.7 | 16 |
| 9  | 1,067.4 | 534.2   | 1,050.4 | 1,049.4 | Q      | 1,641.7 | 821.4   | 1,624.7 | 1,623.7 | 15 |
| 10 | 1,138.4 | 569.7   | 1,121.4 | 1,120.4 | A      | 1,513.7 | 757.3   | 1,496.6 | 1,495.6 | 14 |
| 11 | 1,225.5 | 613.2   | 1,208.4 | 1,207.5 | S      | 1,442.6 | 721.8   | 1,425.6 | 1,424.6 | 13 |
| 12 | 1,296.5 | 648.8   | 1,279.5 | 1,278.5 | A      | 1,355.6 | 678.3   | 1,338.6 | 1,337.6 | 12 |
| 13 | 1,397.6 | 699.3   | 1,380.5 | 1,379.6 | T      | 1,284.5 | 642.8   | 1,267.5 | 1,266.5 | 11 |
| 14 | 1,484.6 | 742.8   | 1,467.6 | 1,466.6 | S      | 1,183.5 | 592.3   | 1,166.5 | 1,165.5 | 10 |
| 15 | 1,571.6 | 786.3   | 1,554.6 | 1,553.6 | S      | 1,096.5 | 548.7   | 1,079.4 | 1,078.5 | 9  |
| 16 | 1,686.7 | 843.8   | 1,669.6 | 1,668.6 | D      | 1,009.4 | 505.2   | 992.4   | 991.4   | 8  |
| 17 | 1,815.7 | 908.4   | 1,798.7 | 1,797.7 | E      | 894.4   | 447.7   | 877.4   | 876.4   | 7  |
| 18 | 1,914.8 | 957.9   | 1,897.7 | 1,896.8 | V      | 765.4   | 383.2   | 748.3   | 747.4   | 6  |
| 19 | 2,042.8 | 1,021.9 | 2,025.8 | 2,024.8 | Q      | 666.3   |         | 649.3   | 648.3   | 5  |
| 20 | 2,209.8 | 1,105.4 | 2,192.8 | 2,191.8 | S+80   | 538.2   |         | 521.2   | 520.2   | 4  |
| 21 | 2,306.9 | 1,153.9 | 2,289.8 | 2,288.9 | P      | 371.2   |         | 354.2   |         | 3  |
| 22 | 2,405.9 | 1,203.5 | 2,388.9 | 2,387.9 | V      | 274.2   |         | 257.2   |         | 2  |
| 23 | 2,580.1 | 1,290.5 | 2,563.0 | 2,562.0 | R      | 175.1   |         | 158.1   |         | 1  |

# PCTK1\_HUMAN: QLpSMTLR

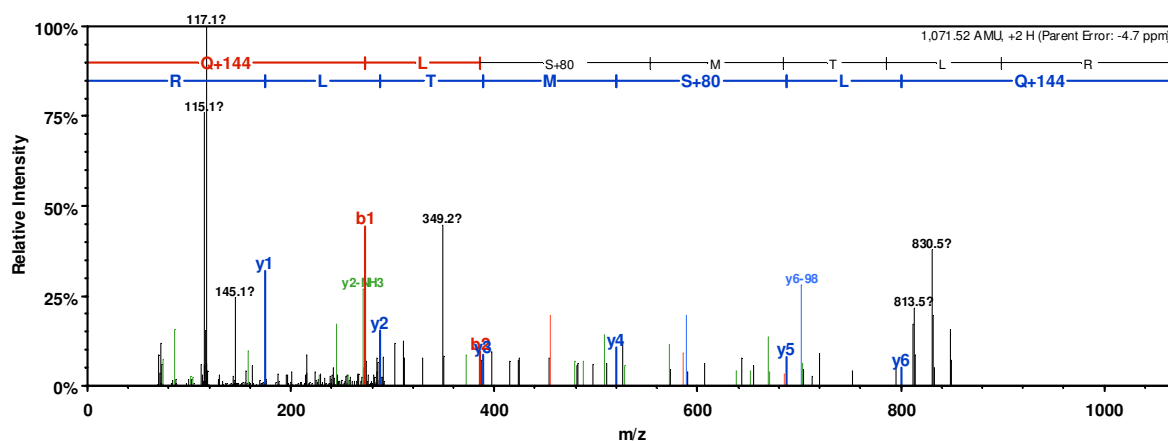

| B | B Ions  | B+2H  | B-NH3   | B-H2O   | AA    | Y Ions  | Y+2H  | Y-NH3   | Y-H2O   | Y |
|---|---------|-------|---------|---------|-------|---------|-------|---------|---------|---|
| 1 | 273.2   |       | 256.1   |         | Q+144 | 1,072.5 | 536.8 | 1,055.5 | 1,054.5 | 7 |
| 2 | 386.3   |       | 369.2   |         | L     | 800.4   | 400.7 | 783.3   | 782.4   | 6 |
| 3 | 553.3   |       | 536.2   | 535.2   | S+80  | 687.3   |       | 670.3   | 669.3   | 5 |
| 4 | 684.3   |       | 667.3   | 666.3   | M     | 520.3   |       | 503.3   | 502.3   | 4 |
| 5 | 785.3   |       | 768.3   | 767.3   | T     | 389.3   |       | 372.2   | 371.2   | 3 |
| 6 | 898.4   | 449.7 | 881.4   | 880.4   | L     | 288.2   |       | 271.2   |         | 2 |
| 7 | 1,072.5 | 536.8 | 1,055.5 | 1,054.5 | R     | 175.1   |       | 158.1   |         | 1 |

# PCTK1\_HUMAN: VpSLSEIGFGK

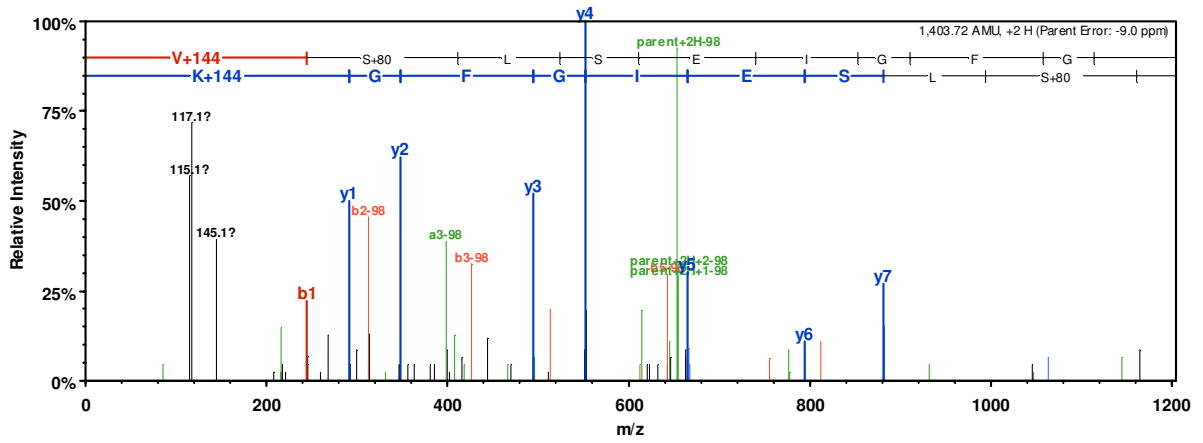

| B  | B Ions  | B+2H  | B-NH3   | B-H2O   | AA    | Y Ions  | Y+2H  | Y-NH3   | Y-H2O   | Y  |
|----|---------|-------|---------|---------|-------|---------|-------|---------|---------|----|
| 1  | 244.2   |       |         |         | V+144 | 1,404.7 | 702.9 | 1,387.7 | 1,386.7 | 10 |
| 2  | 411.2   |       |         | 393.2   | S+80  | 1,161.6 | 581.3 | 1,144.5 | 1,143.6 | 9  |
| 3  | 524.3   |       |         | 506.3   | L     | 994.6   | 497.8 | 977.5   | 976.6   | 8  |
| 4  | 611.3   |       |         | 593.3   | S     | 881.5   | 441.2 | 864.5   | 863.5   | 7  |
| 5  | 740.3   |       |         | 722.3   | E     | 794.5   | 397.7 | 777.4   | 776.4   | 6  |
| 6  | 853.4   | 427.2 |         | 835.4   | I     | 665.4   |       | 648.4   |         | 5  |
| 7  | 910.4   | 455.7 |         | 892.4   | G     | 552.3   |       | 535.3   |         | 4  |
| 8  | 1,057.5 | 529.3 |         | 1,039.5 | F     | 495.3   |       | 478.3   |         | 3  |
| 9  | 1,114.5 | 557.8 |         | 1,096.5 | G     | 348.2   |       | 331.2   |         | 2  |
| 10 | 1,404.7 | 702.9 | 1,387.7 | 1,386.7 | K+144 | 291.2   |       | 274.2   |         | 1  |

# PCTK2\_HUMAN: ApSLSEIGFGK

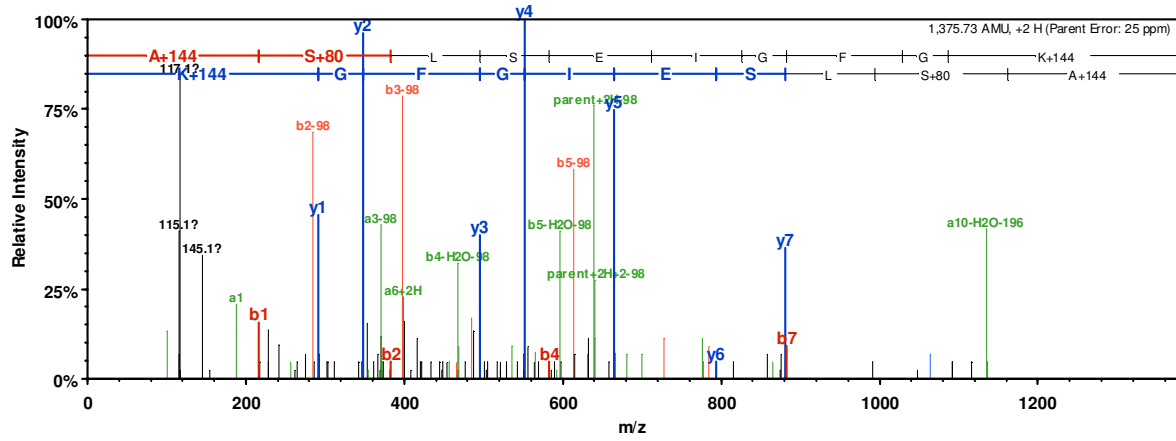

| B  | B Ions  | B+2H  | B-NH3   | B-H2O   | AA    | Y Ions  | Y+2H  | Y-NH3   | Y-H2O   | Y  |
|----|---------|-------|---------|---------|-------|---------|-------|---------|---------|----|
| 1  | 216.1   |       |         |         | A+144 | 1,376.7 | 688.9 | 1,359.7 | 1,358.7 | 10 |
| 2  | 383.1   |       |         | 365.1   | S+80  | 1,161.6 | 581.3 | 1,144.5 | 1,143.6 | 9  |
| 3  | 496.2   |       |         | 478.2   | L     | 994.6   | 497.8 | 977.5   | 976.6   | 8  |
| 4  | 583.3   |       |         | 565.3   | S     | 881.5   | 441.2 | 864.5   | 863.5   | 7  |
| 5  | 712.3   |       |         | 694.3   | E     | 794.5   | 397.7 | 777.4   | 776.4   | 6  |
| 6  | 825.4   | 413.2 |         | 807.4   | I     | 665.4   |       | 648.4   |         | 5  |
| 7  | 882.4   | 441.7 |         | 864.4   | G     | 552.3   |       | 535.3   |         | 4  |
| 8  | 1,029.5 | 515.2 |         | 1,011.5 | F     | 495.3   |       | 478.3   |         | 3  |
| 9  | 1,086.5 | 543.8 |         | 1,068.5 | G     | 348.2   |       | 331.2   |         | 2  |
| 10 | 1,376.7 | 688.9 | 1,359.7 | 1,358.7 | K+144 | 291.2   |       | 274.2   |         | 1  |



# PCTK2\_HUMAN: RASLpSEIGFGK

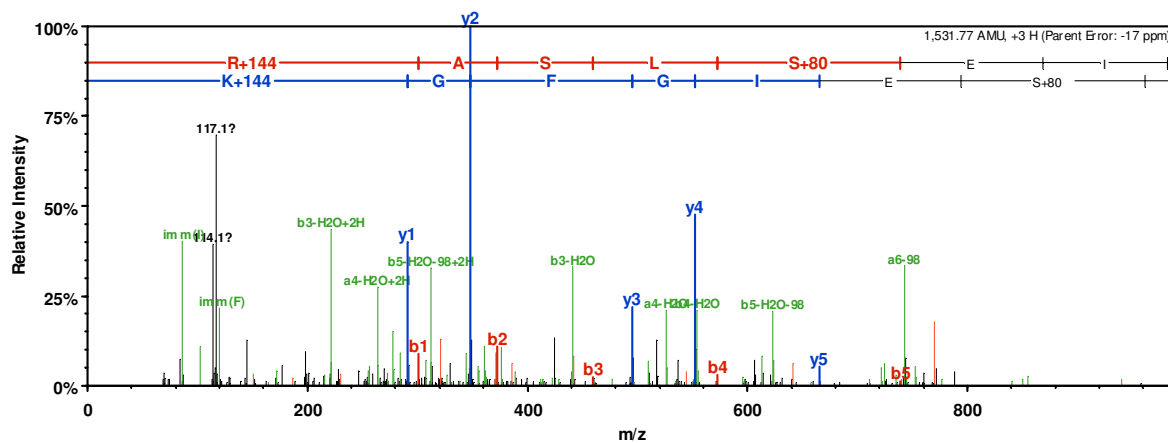

| B  | B Ions  | B+2H  | B-NH3   | B-H2O   | AA    | Y Ions  | Y+2H  | Y-NH3   | Y-H2O   | Y  |
|----|---------|-------|---------|---------|-------|---------|-------|---------|---------|----|
| 1  | 301.2   | 151.1 | 284.2   |         | R+144 | 1,532.8 | 766.9 | 1,515.8 | 1,514.8 | 11 |
| 2  | 372.2   | 186.6 | 355.2   |         | A     | 1,232.6 | 616.8 | 1,215.6 | 1,214.6 | 10 |
| 3  | 459.3   | 230.1 | 442.3   | 441.3   | S     | 1,161.6 | 581.3 | 1,144.5 | 1,143.6 | 9  |
| 4  | 572.4   | 286.7 | 555.3   | 554.4   | L     | 1,074.5 | 537.8 | 1,057.5 | 1,056.5 | 8  |
| 5  | 739.4   | 370.2 | 722.3   | 721.4   | S+80  | 961.5   | 481.2 | 944.4   | 943.4   | 7  |
| 6  | 868.4   | 434.7 | 851.4   | 850.4   | E     | 794.5   | 397.7 | 777.4   | 776.4   | 6  |
| 7  | 981.5   | 491.2 | 964.5   | 963.5   | I     | 665.4   |       | 648.4   |         | 5  |
| 8  | 1,038.5 | 519.8 | 1,021.5 | 1,020.5 | G     | 552.3   |       | 535.3   |         | 4  |
| 9  | 1,185.6 | 593.3 | 1,168.6 | 1,167.6 | F     | 495.3   |       | 478.3   |         | 3  |
| 10 | 1,242.6 | 621.8 | 1,225.6 | 1,224.6 | G     | 348.2   |       | 331.2   |         | 2  |
| 11 | 1,532.8 | 766.9 | 1,515.8 | 1,514.8 | K+144 | 291.2   |       | 274.2   |         | 1  |

# PCTK2\_HUMAN: RLpSLTLR

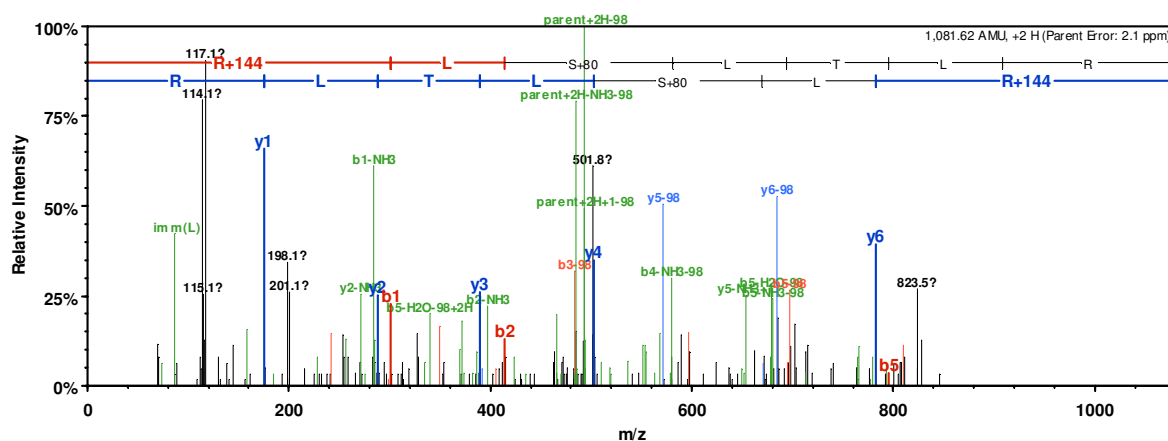

| B | B Ions | B+2H  | B-NH3  | B-H2O  | AA    | Y Ions | Y+2H  | Y-NH3  | Y-H2O  | Y |
|---|--------|-------|--------|--------|-------|--------|-------|--------|--------|---|
| 1 | 301.2  | 151.1 | 284.2  |        | R+144 | 1082.6 | 541.8 | 1065.6 | 1064.6 | 7 |
| 2 | 414.3  | 207.7 | 397.3  |        | L     | 782.4  | 391.7 | 765.4  | 764.4  | 6 |
| 3 | 581.3  | 291.2 | 564.3  | 563.3  | S+80  | 669.3  |       | 652.3  | 651.3  | 5 |
| 4 | 694.4  | 347.7 | 677.4  | 676.4  | L     | 502.3  |       | 485.3  | 484.3  | 4 |
| 5 | 795.4  | 398.2 | 778.4  | 777.4  | T     | 389.3  |       | 372.2  | 371.2  | 3 |
| 6 | 908.5  | 454.8 | 891.5  | 890.5  | L     | 288.2  |       | 271.2  |        | 2 |
| 7 | 1082.6 | 541.8 | 1065.6 | 1064.6 | R     | 175.1  |       | 158.1  |        | 1 |

# PCTK3\_HUMAN: ApSLSDIGFGK

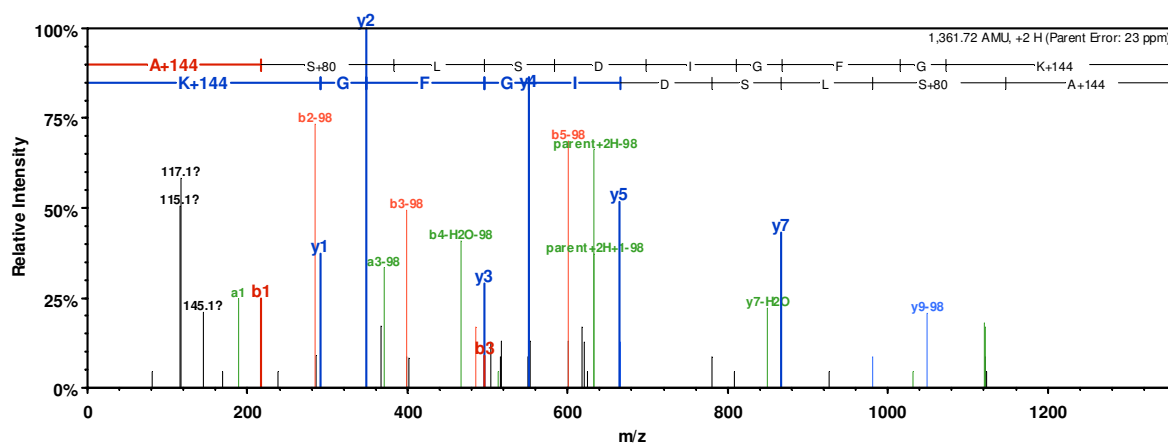

| B  | B Ions  | B+2H  | B-NH3   | B-H2O   | AA    | Y Ions  | Y+2H  | Y-NH3   | Y-H2O   | Y  |
|----|---------|-------|---------|---------|-------|---------|-------|---------|---------|----|
| 1  | 216.1   |       |         |         | A+144 | 1,362.7 | 681.8 | 1,345.7 | 1,344.7 | 10 |
| 2  | 383.1   |       |         | 365.1   | S+80  | 1,147.6 | 574.3 | 1,130.5 | 1,129.5 | 9  |
| 3  | 496.2   |       |         | 478.2   | L     | 980.6   | 490.8 | 963.5   | 962.5   | 8  |
| 4  | 583.3   |       |         | 565.3   | S     | 867.5   | 434.2 | 850.4   | 849.5   | 7  |
| 5  | 698.3   |       |         | 680.3   | D     | 780.4   | 390.7 | 763.4   | 762.4   | 6  |
| 6  | 811.4   | 406.2 |         | 793.4   | I     | 665.4   |       | 648.4   |         | 5  |
| 7  | 868.4   | 434.7 |         | 850.4   | G     | 552.3   |       | 535.3   |         | 4  |
| 8  | 1,015.5 | 508.2 |         | 997.5   | F     | 495.3   |       | 478.3   |         | 3  |
| 9  | 1,072.5 | 536.7 |         | 1,054.5 | G     | 348.2   |       | 331.2   |         | 2  |
| 10 | 1,362.7 | 681.8 | 1,345.7 | 1,344.7 | K+144 | 291.2   |       | 274.2   |         | 1  |

# PCTK3\_HUMAN: RfpSLSVPR

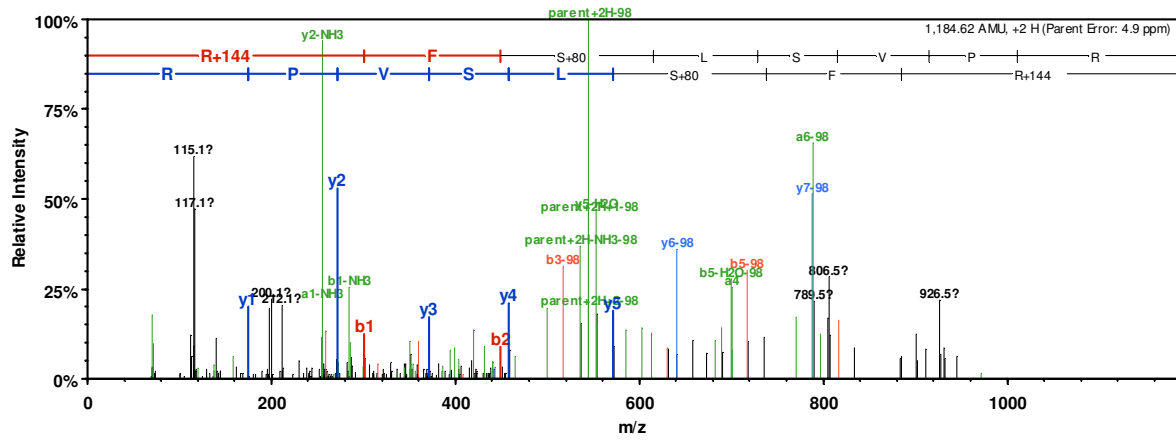

| B | B Ions  | B+2H  | B-NH3   | B-H2O   | AA    | Y Ions  | Y+2H  | Y-NH3   | Y-H2O   | Y |
|---|---------|-------|---------|---------|-------|---------|-------|---------|---------|---|
| 1 | 301.2   | 151.1 | 284.2   |         | R+144 | 1,185.6 | 593.3 | 1,168.6 | 1,167.6 | 8 |
| 2 | 448.3   | 224.6 | 431.3   |         | F     | 885.4   | 443.2 | 868.4   | 867.4   | 7 |
| 3 | 615.3   | 308.1 | 598.3   | 597.3   | S+80  | 738.4   | 369.7 | 721.3   | 720.3   | 6 |
| 4 | 728.4   | 364.7 | 711.3   | 710.4   | L     | 571.4   |       | 554.3   | 553.3   | 5 |
| 5 | 815.4   | 408.2 | 798.4   | 797.4   | S     | 458.3   |       | 441.2   | 440.3   | 4 |
| 6 | 914.5   | 457.7 | 897.4   | 896.5   | V     | 371.2   |       | 354.2   |         | 3 |
| 7 | 1,011.5 | 506.3 | 994.5   | 993.5   | P     | 272.2   |       | 255.1   |         | 2 |
| 8 | 1,185.6 | 593.3 | 1,168.6 | 1,167.6 | R     | 175.1   |       | 158.1   |         | 1 |

# PRPK\_HUMAN: ApTTPADGEEPAPAEAEALAAAR

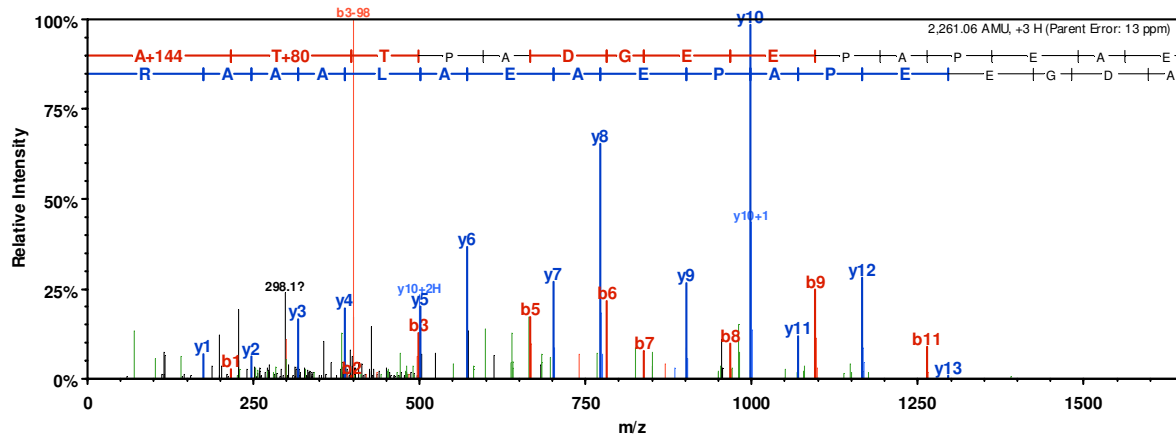

| B  | B Ions  | B+2H    | B-NH3   | B-H2O   | AA    | Y Ions  | Y+2H    | Y-NH3   | Y-H2O   | Y  |
|----|---------|---------|---------|---------|-------|---------|---------|---------|---------|----|
| 1  | 216.1   |         |         |         | A+144 | 2,262.0 | 1,131.5 | 2,245.0 | 2,244.0 | 21 |
| 2  | 397.2   |         |         | 379.2   | T+80  | 2,046.9 | 1,024.0 | 2,029.9 | 2,028.9 | 20 |
| 3  | 498.2   |         |         | 480.2   | T     | 1,865.9 | 933.4   | 1,848.9 | 1,847.9 | 19 |
| 4  | 595.3   |         |         | 577.3   | P     | 1,764.8 | 882.9   | 1,747.8 | 1,746.8 | 18 |
| 5  | 666.3   |         |         | 648.3   | A     | 1,667.8 | 834.4   | 1,650.8 | 1,649.8 | 17 |
| 6  | 781.3   | 391.2   |         | 763.3   | D     | 1,596.8 | 798.9   | 1,579.7 | 1,578.7 | 16 |
| 7  | 838.3   | 419.7   |         | 820.3   | G     | 1,481.7 | 741.4   | 1,464.7 | 1,463.7 | 15 |
| 8  | 967.4   | 484.2   |         | 949.4   | E     | 1,424.7 | 712.9   | 1,407.7 | 1,406.7 | 14 |
| 9  | 1,096.4 | 548.7   |         | 1,078.4 | E     | 1,295.7 | 648.3   | 1,278.6 | 1,277.6 | 13 |
| 10 | 1,193.5 | 597.2   |         | 1,175.5 | P     | 1,166.6 | 583.8   | 1,149.6 | 1,148.6 | 12 |
| 11 | 1,264.5 | 632.8   |         | 1,246.5 | A     | 1,069.6 | 535.3   | 1,052.5 | 1,051.6 | 11 |
| 12 | 1,361.6 | 681.3   |         | 1,343.6 | P     | 998.5   | 499.8   | 981.5   | 980.5   | 10 |
| 13 | 1,490.6 | 745.8   |         | 1,472.6 | E     | 901.5   | 451.2   | 884.4   | 883.5   | 9  |
| 14 | 1,561.7 | 781.3   |         | 1,543.6 | A     | 772.4   | 386.7   | 755.4   | 754.4   | 8  |
| 15 | 1,690.7 | 845.9   |         | 1,672.7 | E     | 701.4   | 351.2   | 684.4   | 683.4   | 7  |
| 16 | 1,761.7 | 881.4   |         | 1,743.7 | A     | 572.4   | 286.7   | 555.3   |         | 6  |
| 17 | 1,874.8 | 937.9   |         | 1,856.8 | L     | 501.3   |         | 484.3   |         | 5  |
| 18 | 1,945.9 | 973.4   |         | 1,927.8 | A     | 388.2   |         | 371.2   |         | 4  |
| 19 | 2,016.9 | 1,009.0 |         | 1,998.9 | A     | 317.2   |         | 300.2   |         | 3  |
| 20 | 2,087.9 | 1,044.5 |         | 2,069.9 | A     | 246.2   |         | 229.1   |         | 2  |
| 21 | 2,262.0 | 1,131.5 | 2,245.0 | 2,244.0 | R     | 175.1   |         | 158.1   |         | 1  |

# PRPK\_HUMAN: ATpTPADGEEPAPAEALAAAR

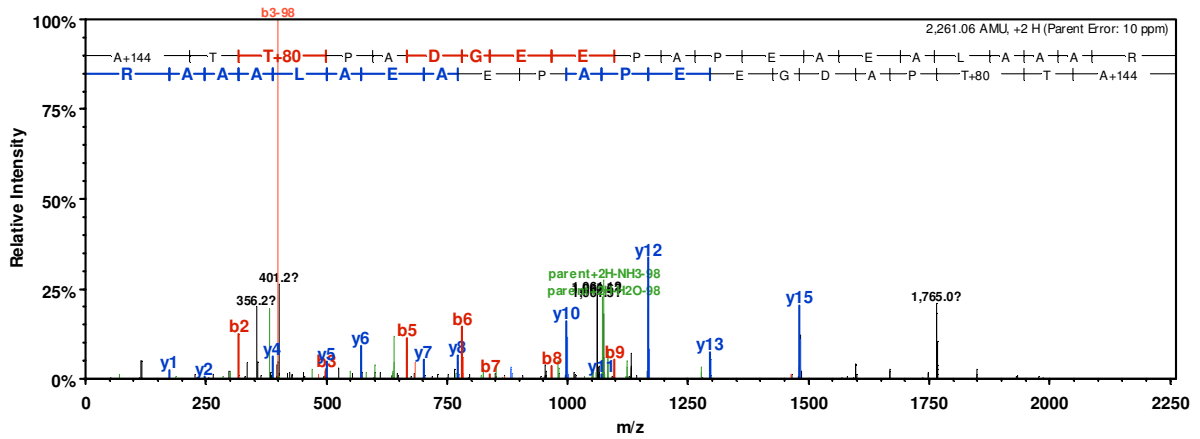

| B  | B Ions  | B+2H    | B-NH3   | B-H2O   | AA    | Y Ions  | Y+2H    | Y-NH3   | Y-H2O   | Y  |
|----|---------|---------|---------|---------|-------|---------|---------|---------|---------|----|
| 1  | 216.1   |         |         |         | A+144 | 2,262.0 | 1,131.5 | 2,245.0 | 2,244.0 | 21 |
| 2  | 317.2   |         |         | 299.2   | T     | 2,046.9 | 1,024.0 | 2,029.9 | 2,028.9 | 20 |
| 3  | 498.2   |         |         | 480.2   | T+80  | 1,945.9 | 973.4   | 1,928.8 | 1,927.8 | 19 |
| 4  | 595.3   |         |         | 577.3   | P     | 1,764.8 | 882.9   | 1,747.8 | 1,746.8 | 18 |
| 5  | 666.3   |         |         | 648.3   | A     | 1,667.8 | 834.4   | 1,650.8 | 1,649.8 | 17 |
| 6  | 781.3   | 391.2   |         | 763.3   | D     | 1,596.8 | 798.9   | 1,579.7 | 1,578.7 | 16 |
| 7  | 838.3   | 419.7   |         | 820.3   | G     | 1,481.7 | 741.4   | 1,464.7 | 1,463.7 | 15 |
| 8  | 967.4   | 484.2   |         | 949.4   | E     | 1,424.7 | 712.9   | 1,407.7 | 1,406.7 | 14 |
| 9  | 1,096.4 | 548.7   |         | 1,078.4 | E     | 1,295.7 | 648.3   | 1,278.6 | 1,277.6 | 13 |
| 10 | 1,193.5 | 597.2   |         | 1,175.5 | P     | 1,166.6 | 583.8   | 1,149.6 | 1,148.6 | 12 |
| 11 | 1,264.5 | 632.8   |         | 1,246.5 | A     | 1,069.6 | 535.3   | 1,052.5 | 1,051.6 | 11 |
| 12 | 1,361.6 | 681.3   |         | 1,343.6 | P     | 998.5   | 499.8   | 981.5   | 980.5   | 10 |
| 13 | 1,490.6 | 745.8   |         | 1,472.6 | E     | 901.5   | 451.2   | 884.4   | 883.5   | 9  |
| 14 | 1,561.7 | 781.3   |         | 1,543.6 | A     | 772.4   | 386.7   | 755.4   | 754.4   | 8  |
| 15 | 1,690.7 | 845.9   |         | 1,672.7 | E     | 701.4   | 351.2   | 684.4   | 683.4   | 7  |
| 16 | 1,761.7 | 881.4   |         | 1,743.7 | A     | 572.4   | 286.7   | 555.3   |         | 6  |
| 17 | 1,874.8 | 937.9   |         | 1,856.8 | L     | 501.3   |         | 484.3   |         | 5  |
| 18 | 1,945.9 | 973.4   |         | 1,927.8 | A     | 388.2   |         | 371.2   |         | 4  |
| 19 | 2,016.9 | 1,009.0 |         | 1,998.9 | A     | 317.2   |         | 300.2   |         | 3  |
| 20 | 2,087.9 | 1,044.5 |         | 2,069.9 | A     | 246.2   |         | 229.1   |         | 2  |
| 21 | 2,262.0 | 1,131.5 | 2,245.0 | 2,244.0 | R     | 175.1   |         | 158.1   |         | 1  |

# RIOK2\_HUMAN: AEVYGpSENESER

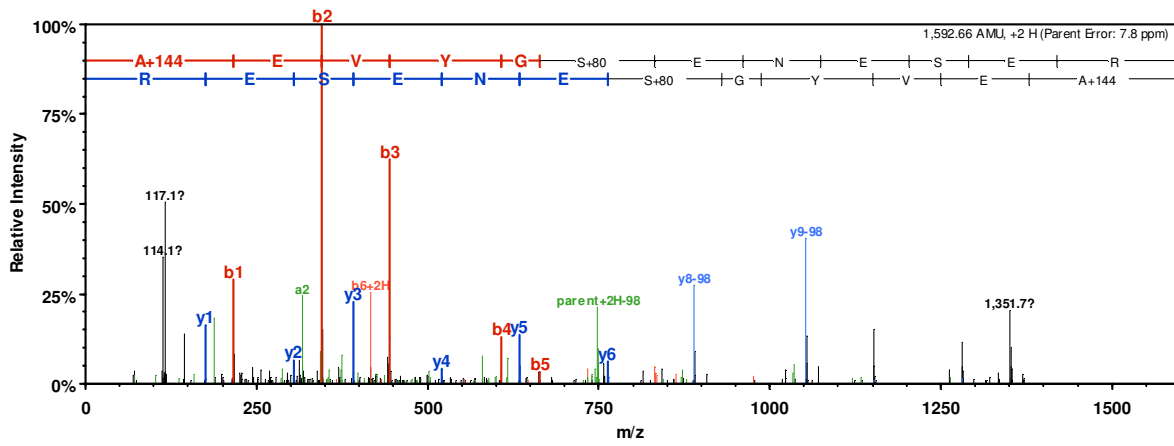

| B  | B Ions  | B+2H  | B-NH3   | B-H2O   | AA    | Y Ions  | Y+2H  | Y-NH3   | Y-H2O   | Y  |
|----|---------|-------|---------|---------|-------|---------|-------|---------|---------|----|
| 1  | 216.1   |       |         |         | A+144 | 1,593.7 | 797.3 | 1,576.6 | 1,575.6 | 12 |
| 2  | 345.2   |       |         | 327.2   | E     | 1,378.5 | 689.8 | 1,361.5 | 1,360.5 | 11 |
| 3  | 444.3   |       |         | 426.2   | V     | 1,249.5 | 625.2 | 1,232.4 | 1,231.5 | 10 |
| 4  | 607.3   |       |         | 589.3   | Y     | 1,150.4 | 575.7 | 1,133.4 | 1,132.4 | 9  |
| 5  | 664.3   |       |         | 646.3   | G     | 987.3   | 494.2 | 970.3   | 969.3   | 8  |
| 6  | 831.3   | 416.2 |         | 813.3   | S+80  | 930.3   | 465.7 | 913.3   | 912.3   | 7  |
| 7  | 960.4   | 480.7 |         | 942.4   | E     | 763.3   | 382.2 | 746.3   | 745.3   | 6  |
| 8  | 1,074.4 | 537.7 | 1,057.4 | 1,056.4 | N     | 634.3   |       | 617.3   | 616.3   | 5  |
| 9  | 1,203.5 | 602.2 | 1,186.4 | 1,185.5 | E     | 520.2   |       | 503.2   | 502.2   | 4  |
| 10 | 1,290.5 | 645.8 | 1,273.5 | 1,272.5 | S     | 391.2   |       | 374.2   | 373.2   | 3  |
| 11 | 1,419.5 | 710.3 | 1,402.5 | 1,401.5 | E     | 304.2   |       | 287.1   | 286.2   | 2  |
| 12 | 1,593.7 | 797.3 | 1,576.6 | 1,575.6 | R     | 175.1   |       | 158.1   |         | 1  |

# RIOK2\_HUMAN: EGSEFSF<sub>p</sub>SDGEVAEK

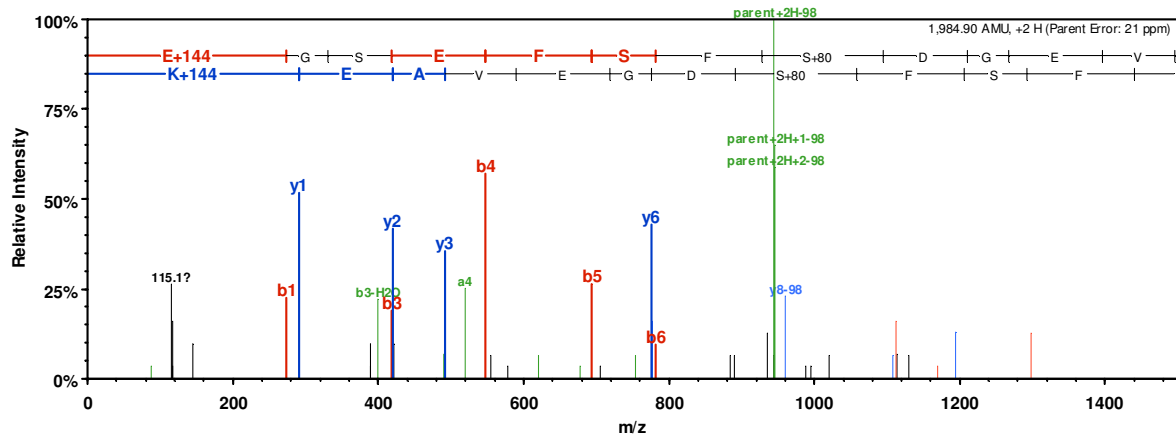

| B  | B Ions  | B+2H  | B-NH3   | B-H2O   | AA    | Y Ions  | Y+2H  | Y-NH3   | Y-H2O   | Y  |
|----|---------|-------|---------|---------|-------|---------|-------|---------|---------|----|
| 1  | 274.2   |       |         | 256.1   | E+144 | 1,985.9 | 993.4 | 1,968.8 | 1,967.9 | 15 |
| 2  | 331.2   |       |         | 313.2   | G     | 1,712.7 | 856.9 | 1,695.7 | 1,694.7 | 14 |
| 3  | 418.2   |       |         | 400.2   | S     | 1,655.7 | 828.4 | 1,638.7 | 1,637.7 | 13 |
| 4  | 547.2   |       |         | 529.2   | E     | 1,568.7 | 784.8 | 1,551.6 | 1,550.7 | 12 |
| 5  | 694.3   |       |         | 676.3   | F     | 1,439.6 | 720.3 | 1,422.6 | 1,421.6 | 11 |
| 6  | 781.3   | 391.2 |         | 763.3   | S     | 1,292.6 | 646.8 | 1,275.5 | 1,274.5 | 10 |
| 7  | 928.4   | 464.7 |         | 910.4   | F     | 1,205.5 | 603.3 | 1,188.5 | 1,187.5 | 9  |
| 8  | 1,095.4 | 548.2 |         | 1,077.4 | S+80  | 1,058.5 | 529.7 | 1,041.4 | 1,040.4 | 8  |
| 9  | 1,210.4 | 605.7 |         | 1,192.4 | D     | 891.5   | 446.2 | 874.4   | 873.4   | 7  |
| 10 | 1,267.5 | 634.2 |         | 1,249.5 | G     | 776.4   | 388.7 | 759.4   | 758.4   | 6  |
| 11 | 1,396.5 | 698.8 |         | 1,378.5 | E     | 719.4   |       | 702.4   | 701.4   | 5  |
| 12 | 1,495.6 | 748.3 |         | 1,477.6 | V     | 590.4   |       | 573.3   | 572.4   | 4  |
| 13 | 1,566.6 | 783.8 |         | 1,548.6 | A     | 491.3   |       | 474.3   | 473.3   | 3  |
| 14 | 1,695.7 | 848.3 |         | 1,677.6 | E     | 420.3   |       | 403.2   | 402.2   | 2  |
| 15 | 1,985.9 | 993.4 | 1,968.8 | 1,967.9 | K+144 | 291.2   |       | 274.2   |         | 1  |
